# Supplementary material for: Atypical DNA methylation, sRNA-size distribution, and female gametogenesis in Utricularia gibba
Source: Sci Rep. 2021 Aug 3;11:15725. doi: 10.1038/s41598-021-95054-y (PMC8333044; doi:10.1038/s41598-021-95054-y)
Supplement: Supplementary file 3 — Supplementary Information 3. [file 41598_2021_95054_MOESM3_ESM.xlsx]

## Sheet: putative_lncRNAs
Dataset S2. lncRNAs identified in Utricularia gibba.
ID_lnc	Unitig	Start	End	Size	Strand	Exon Number
TRINITY_DN12471_c0_g1	unitig_899	1471801	1472788	918	1	2
TRINITY_DN5837_c0_g2	unitig_32	386338	387543	935	-1	3
TRINITY_DN169_c0_g1	unitig_747	415448	416349	902	1	1
TRINITY_DN18630_c0_g1	unitig_748	610923	611503	581	1	1
TRINITY_DN21840_c0_g1	unitig_62	464696	465509	814	1	1
TRINITY_DN26084_c0_g1	unitig_52	444221	444827	612	1	1
TRINITY_DN25468_c0_g1	unitig_899	2396413	2397531	1119	1	1
TRINITY_DN16337_c0_g1	unitig_699	2513637	2514154	518	1	1
TRINITY_DN23643_c0_g1	unitig_37	73930	74619	690	1	1
TRINITY_DN23174_c0_g1	unitig_699	2231028	2231756	729	1	1
TRINITY_DN27046_c0_g2	unitig_748	4123297	4123908	612	1	1
TRINITY_DN14669_c0_g1	unitig_899	1779775	1780686	912	1	1
TRINITY_DN14824_c0_g1	unitig_22	4485765	4486806	1042	1	1
TRINITY_DN4149_c0_g2	unitig_8	280926	281867	687	-1	2
TRINITY_DN18336_c0_g1	unitig_60	321234	322035	724	-1	2
TRINITY_DN22682_c0_g1	unitig_747	1523189	1523956	768	1	1
TRINITY_DN27436_c0_g1	unitig_748	3867983	3868726	745	1	1
TRINITY_DN20095_c0_g1	unitig_749	262000	262502	503	1	1
TRINITY_DN28394_c0_g1	unitig_899	2697420	2697913	494	1	1
TRINITY_DN29512_c0_g1	unitig_26	2688703	2689787	1085	1	1
TRINITY_DN21850_c0_g1	unitig_578	1928302	1929191	730	-1	3
TRINITY_DN3199_c0_g2	unitig_46	1821960	1822453	494	1	1
TRINITY_DN10043_c1_g1	unitig_22	4138720	4139319	600	1	1
TRINITY_DN10945_c1_g1	unitig_52	169581	170396	816	1	1
TRINITY_DN15482_c0_g1	unitig_62	435441	435945	505	1	1
TRINITY_DN29993_c0_g1	unitig_750	127588	128096	509	1	1
TRINITY_DN13963_c0_g1	unitig_748	1451786	1452254	469	1	1
TRINITY_DN18935_c0_g1	unitig_699	3167336	3168252	561	1	2
TRINITY_DN3211_c0_g2	unitig_699	2012819	2013569	751	1	1
TRINITY_DN4978_c0_g1	unitig_26	1851293	1852441	897	-1	2
TRINITY_DN10595_c0_g1	unitig_899	601990	603328	701	-1	3
TRINITY_DN30060_c0_g1	unitig_0	1703316	1703985	512	-1	2
TRINITY_DN14658_c0_g1	unitig_52	2004398	2004872	475	1	1
TRINITY_DN2097_c0_g2	unitig_21	1513889	1515239	878	-1	2
TRINITY_DN23445_c0_g1	unitig_22	1124492	1125069	578	1	1
TRINITY_DN16108_c0_g1	unitig_0	461134	461914	781	1	1
TRINITY_DN19326_c0_g1	unitig_899	834623	835029	407	1	1
TRINITY_DN21854_c0_g1	unitig_748	2268095	2268881	787	1	1
TRINITY_DN2190_c0_g1	unitig_748	300023	300489	467	1	1
TRINITY_DN22597_c0_g1	unitig_32	342074	343106	798	1	2
TRINITY_DN26905_c0_g1	unitig_0	2581260	2581671	413	1	1
TRINITY_DN31011_c0_g1	unitig_0	7258640	7259114	481	1	1
TRINITY_DN31945_c0_g1	unitig_899	1935490	1936043	554	1	1
TRINITY_DN5811_c0_g1	unitig_747	129043	130797	1341	-1	5
TRINITY_DN20848_c0_g1	unitig_21	2667080	2667504	425	1	1
TRINITY_DN24076_c0_g1	unitig_699	1961470	1961935	466	1	1
TRINITY_DN28241_c0_g1	unitig_52	2675468	2676223	756	1	1
TRINITY_DN29795_c0_g1	unitig_26	3194056	3194520	465	1	1
TRINITY_DN30313_c0_g1	unitig_22	2030293	2030714	422	1	1
TRINITY_DN4705_c0_g1	unitig_32	713950	715157	997	1	2
TRINITY_DN11306_c1_g1	unitig_21	1496042	1496724	598	-1	2
TRINITY_DN1169_c0_g1	unitig_899	3344669	3345486	669	-1	3
TRINITY_DN1627_c0_g1	unitig_744	1287386	1288243	568	-1	2
TRINITY_DN19543_c0_g1	unitig_52	2225620	2226358	746	1	1
TRINITY_DN23178_c0_g1	unitig_21	1206171	1206744	574	1	1
TRINITY_DN27794_c0_g1	unitig_749	1522875	1523418	544	1	1
TRINITY_DN31000_c0_g1	unitig_747	1518806	1519228	423	1	1
TRINITY_DN3235_c0_g2	unitig_46	2717866	2718783	918	1	1
TRINITY_DN11416_c0_g2	unitig_0	6427963	6429047	1008	1	2
TRINITY_DN22580_c0_g1	unitig_26	3171217	3171624	408	1	1
TRINITY_DN22870_c0_g1	unitig_37	1191298	1192047	750	1	1
TRINITY_DN23884_c0_g1	unitig_748	1362479	1363107	629	1	1
TRINITY_DN27105_c0_g1	unitig_0	3914351	3915299	676	1	2
TRINITY_DN27914_c0_g1	unitig_748	3207950	3208529	580	1	1
TRINITY_DN4920_c0_g1	unitig_60	682162	683206	1046	1	1
TRINITY_DN10795_c0_g1	unitig_46	863947	864948	574	1	4
TRINITY_DN12009_c1_g1	unitig_746	46627	47242	422	1	2
TRINITY_DN12943_c0_g1	unitig_27	166638	167291	654	1	1
TRINITY_DN16454_c0_g1	unitig_26	2982578	2983029	397	-1	2
TRINITY_DN18458_c0_g2	unitig_62	526687	527365	708	-1	1
TRINITY_DN22500_c0_g1	unitig_899	625663	626396	489	-1	2
TRINITY_DN31518_c0_g1	unitig_61	1493131	1493717	589	1	1
TRINITY_DN3977_c0_g2	unitig_8	1582490	1583711	812	-1	2
TRINITY_DN13982_c0_g1	unitig_8	1666271	1666983	624	1	2
TRINITY_DN14_c0_g1	unitig_747	760594	761540	947	1	1
TRINITY_DN16859_c0_g1	unitig_61	1164766	1165198	433	1	1
TRINITY_DN18731_c0_g1	unitig_61	929739	930098	360	1	1
TRINITY_DN19855_c0_g1	unitig_744	2069851	2070323	474	1	1
TRINITY_DN28705_c0_g1	unitig_21	2103388	2103770	383	1	1
TRINITY_DN30668_c0_g1	unitig_899	967590	967968	379	1	1
TRINITY_DN5896_c0_g1	unitig_26	4349559	4350085	527	1	1
TRINITY_DN11018_c2_g1	unitig_699	1358970	1359442	473	1	1
TRINITY_DN11146_c0_g1	unitig_22	730669	731991	1173	-1	3
TRINITY_DN13985_c0_g1	unitig_46	2934979	2935527	549	1	1
TRINITY_DN15690_c0_g1	unitig_8	1589841	1590587	598	1	3
TRINITY_DN26353_c0_g1	unitig_27	1585593	1586042	450	1	1
TRINITY_DN27358_c0_g1	unitig_60	544883	545207	327	1	1
TRINITY_DN27582_c0_g1	unitig_27	2086143	2086891	478	-1	2
TRINITY_DN31220_c0_g1	unitig_578	1154653	1155080	428	1	1
TRINITY_DN3985_c0_g2	unitig_22	4711127	4711994	766	-1	2
TRINITY_DN5097_c0_g1	unitig_32	3555255	3555940	597	-1	2
TRINITY_DN5194_c0_g3	unitig_22	2168606	2169862	1185	-1	2
TRINITY_DN14803_c0_g1	unitig_0	5799378	5800482	1005	1	2
TRINITY_DN27372_c0_g1	unitig_0	6531703	6532117	420	1	1
TRINITY_DN28892_c0_g1	unitig_899	297047	297647	601	1	1
TRINITY_DN29894_c0_g1	unitig_0	2458325	2459101	582	1	2
TRINITY_DN31091_c0_g1	unitig_899	834134	834622	489	1	1
TRINITY_DN19991_c0_g1	unitig_748	4909359	4909781	423	1	1
TRINITY_DN21049_c0_g1	unitig_85	292762	293172	411	1	1
TRINITY_DN23678_c0_g1	unitig_62	623046	623525	480	1	1
TRINITY_DN26055_c0_g1	unitig_748	2548515	2548863	349	1	1
TRINITY_DN26586_c0_g1	unitig_60	481142	481768	627	1	1
TRINITY_DN27603_c0_g1	unitig_90	211125	211687	487	1	2
TRINITY_DN306_c0_g1	unitig_26	1270046	1270594	549	1	1
TRINITY_DN3088_c0_g2	unitig_37	759364	760010	657	1	1
TRINITY_DN31905_c0_g1	unitig_747	249572	250029	464	1	1
TRINITY_DN10349_c2_g1	unitig_46	2628427	2628945	519	1	1
TRINITY_DN12715_c0_g1	unitig_61	989851	990698	848	1	1
TRINITY_DN13181_c0_g1	unitig_0	6024734	6025204	471	1	1
TRINITY_DN14967_c0_g1	unitig_736	1158708	1159371	690	1	1
TRINITY_DN15521_c0_g1	unitig_8	965824	966519	610	1	2
TRINITY_DN16167_c0_g1	unitig_21	1190629	1191195	567	1	1
TRINITY_DN20203_c0_g1	unitig_62	95071	96066	799	-1	2
TRINITY_DN21643_c0_g1	unitig_736	1556445	1557044	504	-1	2
TRINITY_DN30537_c0_g1	unitig_32	560979	561410	432	1	1
TRINITY_DN12025_c0_g2	unitig_0	5542511	5542899	389	1	1
TRINITY_DN14045_c0_g1	unitig_26	1051458	1051909	452	1	1
TRINITY_DN1481_c0_g1	unitig_899	3107777	3108155	379	1	1
TRINITY_DN15228_c0_g1	unitig_22	722377	722742	366	1	1
TRINITY_DN18566_c0_g1	unitig_22	1125833	1126811	491	-1	2
TRINITY_DN20179_c0_g1	unitig_749	2305463	2306789	462	-1	3
TRINITY_DN24996_c0_g1	unitig_749	1015717	1016295	579	1	1
TRINITY_DN29766_c0_g1	unitig_748	4817593	4818549	481	-1	2
TRINITY_DN30856_c0_g1	unitig_60	952839	953213	375	1	1
TRINITY_DN31646_c0_g1	unitig_88	392789	393130	349	1	1
TRINITY_DN4490_c0_g1	unitig_8	2541952	2542600	536	-1	2
TRINITY_DN537_c0_g2	unitig_0	2411320	2412190	871	1	1
TRINITY_DN10473_c0_g2	unitig_744	676946	678428	1289	-1	3
TRINITY_DN14955_c0_g1	unitig_62	2208628	2209038	411	1	1
TRINITY_DN16805_c0_g1	unitig_46	3259495	3259829	335	1	1
TRINITY_DN20154_c0_g1	unitig_0	7190399	7190848	451	1	1
TRINITY_DN23336_c0_g1	unitig_37	828412	829076	665	1	1
TRINITY_DN24069_c0_g1	unitig_0	1638265	1638653	389	1	1
TRINITY_DN26471_c0_g1	unitig_21	1609641	1610429	789	1	1
TRINITY_DN26678_c0_g1	unitig_744	2099517	2100374	860	1	1
TRINITY_DN29608_c0_g1	unitig_0	2550836	2551455	620	1	1
TRINITY_DN3685_c0_g1	unitig_26	3875253	3875760	508	1	1
TRINITY_DN4234_c0_g1	unitig_736	308686	309249	565	1	1
TRINITY_DN4239_c0_g1	unitig_21	2654289	2655256	803	1	3
TRINITY_DN5421_c0_g1	unitig_747	594418	595694	606	-1	2
TRINITY_DN5525_c0_g3	unitig_0	7234260	7235247	988	1	1
TRINITY_DN10550_c0_g2	unitig_26	1858535	1859216	682	1	1
TRINITY_DN17151_c0_g1	unitig_62	1095273	1095757	374	-1	2
TRINITY_DN17507_c0_g1	unitig_699	2514133	2514435	303	1	1
TRINITY_DN19691_c0_g1	unitig_52	2594980	2595261	282	1	1
TRINITY_DN19980_c0_g1	unitig_26	1225232	1226092	621	-1	2
TRINITY_DN27183_c0_g1	unitig_899	2932795	2933176	382	1	1
TRINITY_DN31239_c0_g1	unitig_22	5178358	5178804	447	1	1
TRINITY_DN4147_c0_g1	unitig_22	2113042	2113647	515	1	2
TRINITY_DN4206_c0_g2	unitig_899	2800589	2800802	405	-1	2
TRINITY_DN11549_c1_g1	unitig_0	8188497	8188857	361	1	1
TRINITY_DN12344_c0_g1	unitig_749	2761818	2762125	308	1	1
TRINITY_DN12443_c0_g1	unitig_746	84558	84984	427	1	1
TRINITY_DN1551_c0_g1	unitig_748	5264233	5264645	413	1	1
TRINITY_DN15563_c0_g1	unitig_699	1355659	1356205	547	1	1
TRINITY_DN1579_c0_g1	unitig_46	1787690	1788226	429	1	2
TRINITY_DN17871_c0_g1	unitig_22	15745	16047	303	1	1
TRINITY_DN1916_c0_g2	unitig_748	1300336	1300841	422	-1	2
TRINITY_DN23363_c0_g1	unitig_0	368029	368969	482	-1	3
TRINITY_DN26855_c0_g1	unitig_27	1568756	1569351	596	1	1
TRINITY_DN29754_c0_g1	unitig_699	2881892	2882492	601	1	1
TRINITY_DN29839_c0_g1	unitig_21	556220	556721	502	1	1
TRINITY_DN29935_c0_g1	unitig_22	6052295	6052683	389	1	1
TRINITY_DN32100_c0_g1	unitig_26	1896824	1897372	549	1	1
TRINITY_DN5254_c0_g1	unitig_736	501409	502600	930	-1	2
TRINITY_DN11051_c0_g1	unitig_748	5505612	5506498	888	1	1
TRINITY_DN13722_c0_g1	unitig_52	2262842	2263140	299	1	1
TRINITY_DN16137_c0_g1	unitig_26	3305595	3305850	256	1	1
TRINITY_DN16181_c0_g1	unitig_21	50158	50448	291	1	1
TRINITY_DN20302_c0_g1	unitig_27	1195897	1196311	415	1	1
TRINITY_DN20613_c0_g1	unitig_8	2475909	2476253	357	-1	1
TRINITY_DN22111_c0_g1	unitig_8	1196012	1197405	1142	1	3
TRINITY_DN22846_c0_g1	unitig_21	2331696	2332160	465	1	1
TRINITY_DN24358_c0_g1	unitig_748	276125	276503	379	1	1
TRINITY_DN25824_c0_g1	unitig_22	1823111	1823450	340	1	1
TRINITY_DN27267_c0_g1	unitig_749	2733837	2734202	366	1	1
TRINITY_DN27303_c0_g1	unitig_22	5939548	5939878	331	1	1
TRINITY_DN3015_c0_g1	unitig_899	1212453	1212940	409	-1	2
TRINITY_DN31341_c0_g1	unitig_899	1760172	1760445	274	1	1
TRINITY_DN32135_c0_g1	unitig_26	943556	944034	479	1	1
TRINITY_DN3380_c0_g2	unitig_52	467115	467843	580	1	3
TRINITY_DN5242_c0_g1	unitig_21	589589	591398	1841	-1	1
TRINITY_DN11292_c0_g1	unitig_0	3079541	3080036	496	1	1
TRINITY_DN14059_c0_g1	unitig_699	1038174	1038939	417	-1	2
TRINITY_DN14609_c0_g1	unitig_744	1286794	1287231	369	1	2
TRINITY_DN16156_c0_g1	unitig_578	2869627	2870756	1130	1	1
TRINITY_DN19794_c0_g1	unitig_0	3209124	3209536	413	1	1
TRINITY_DN20108_c0_g1	unitig_578	2016815	2017251	437	1	1
TRINITY_DN20652_c0_g1	unitig_27	1621785	1622170	386	1	1
TRINITY_DN21204_c0_g1	unitig_22	5779610	5780265	656	1	1
TRINITY_DN21268_c0_g1	unitig_744	1616872	1617436	363	1	2
TRINITY_DN22173_c0_g1	unitig_46	3179197	3179848	652	1	1
TRINITY_DN22697_c0_g1	unitig_736	982808	983311	504	1	1
TRINITY_DN22842_c0_g1	unitig_578	348341	348731	391	1	1
TRINITY_DN24568_c0_g1	unitig_27	821053	821600	328	1	2
TRINITY_DN26610_c0_g1	unitig_21	1589871	1590303	433	1	1
TRINITY_DN28183_c0_g1	unitig_748	4496137	4496509	393	-1	1
TRINITY_DN31004_c0_g1	unitig_37	2519862	2520118	257	1	1
TRINITY_DN32405_c0_g1	unitig_749	1627975	1628251	277	1	1
TRINITY_DN4799_c0_g1	unitig_749	420490	421008	325	-1	2
TRINITY_DN5101_c0_g1	unitig_22	6178546	6179414	628	-1	3
TRINITY_DN10802_c0_g2	unitig_52	90046	92114	1288	-1	4
TRINITY_DN10839_c0_g1	unitig_8	5687896	5691696	833	-1	5
TRINITY_DN11379_c0_g2	unitig_46	3000025	3001169	604	-1	3
TRINITY_DN14075_c0_g1	unitig_32	558967	559282	316	1	1
TRINITY_DN14112_c0_g1	unitig_744	2238197	2238545	349	1	1
TRINITY_DN14650_c0_g1	unitig_578	2099834	2100344	511	1	1
TRINITY_DN15297_c0_g2	unitig_578	939181	939740	560	1	1
TRINITY_DN16062_c0_g1	unitig_748	2741175	2741580	406	1	1
TRINITY_DN16660_c0_g1	unitig_749	2061273	2061901	629	1	1
TRINITY_DN18498_c0_g1	unitig_22	4898618	4899020	403	1	1
TRINITY_DN24143_c0_g1	unitig_21	643871	644243	373	1	1
TRINITY_DN262_c0_g1	unitig_88	276421	276755	336	1	1
TRINITY_DN27188_c0_g1	unitig_699	1370962	1371390	429	1	1
TRINITY_DN27346_c0_g1	unitig_62	1383134	1383569	366	1	2
TRINITY_DN27606_c0_g1	unitig_8	2472563	2473321	434	1	2
TRINITY_DN29895_c0_g1	unitig_27	1915677	1915968	292	1	1
TRINITY_DN30394_c0_g1	unitig_60	1395562	1396314	754	1	1
TRINITY_DN30714_c0_g1	unitig_22	5240318	5240566	249	1	1
TRINITY_DN31460_c0_g1	unitig_52	142412	142721	310	1	1
TRINITY_DN4371_c0_g1	unitig_21	653077	653571	495	1	1
TRINITY_DN5693_c0_g1	unitig_0	1023703	1024997	1161	1	2
TRINITY_DN10130_c0_g1	unitig_21	2135729	2137164	627	-1	4
TRINITY_DN1096_c0_g1	unitig_61	1230466	1231071	606	1	1
TRINITY_DN11643_c0_g1	unitig_62	1634120	1634677	424	-1	2
TRINITY_DN11776_c0_g2	unitig_749	983962	984817	932	1	2
TRINITY_DN12164_c1_g1	unitig_749	2415371	2415972	841	1	2
TRINITY_DN16301_c0_g1	unitig_21	2901941	2902530	590	1	1
TRINITY_DN17030_c0_g1	unitig_0	6435598	6435942	345	1	1
TRINITY_DN17452_c0_g1	unitig_744	2044065	2044367	303	1	1
TRINITY_DN17764_c0_g1	unitig_62	2383789	2384078	290	1	1
TRINITY_DN20920_c0_g1	unitig_26	1782049	1783615	815	-1	3
TRINITY_DN23243_c0_g1	unitig_37	996395	996847	453	1	1
TRINITY_DN24059_c0_g1	unitig_899	1448902	1449623	722	1	1
TRINITY_DN24700_c0_g1	unitig_747	721696	722294	295	1	2
TRINITY_DN25491_c0_g1	unitig_37	2422499	2423809	866	1	2
TRINITY_DN27104_c0_g1	unitig_578	1967931	1968627	699	1	1
TRINITY_DN27307_c0_g1	unitig_46	2481647	2482041	395	1	1
TRINITY_DN28350_c0_g1	unitig_21	2462157	2462788	632	1	1
TRINITY_DN28543_c0_g1	unitig_26	2301941	2302177	237	1	1
TRINITY_DN2932_c0_g1	unitig_52	2041343	2042024	682	1	1
TRINITY_DN29706_c0_g1	unitig_0	3046359	3047022	664	1	1
TRINITY_DN30786_c0_g1	unitig_746	263741	264154	414	1	1
TRINITY_DN31399_c0_g1	unitig_52	2620417	2621020	604	1	1
TRINITY_DN31630_c0_g1	unitig_749	1413052	1413503	452	1	1
TRINITY_DN396_c0_g1	unitig_8	5124155	5125270	1041	-1	2
TRINITY_DN437_c0_g2	unitig_61	232729	233411	683	1	1
TRINITY_DN5145_c0_g1	unitig_37	2091660	2092150	491	1	1
TRINITY_DN5441_c0_g3	unitig_0	6856792	6857200	409	1	1
TRINITY_DN12883_c0_g1	unitig_62	2141665	2142352	688	1	1
TRINITY_DN1299_c0_g1	unitig_749	3088309	3088872	564	1	1
TRINITY_DN13226_c0_g1	unitig_0	2758972	2759406	435	1	1
TRINITY_DN21687_c0_g1	unitig_27	1598297	1598831	406	-1	2
TRINITY_DN22254_c0_g1	unitig_52	2916906	2917930	631	-1	4
TRINITY_DN22647_c0_g1	unitig_32	1081611	1081960	350	1	1
TRINITY_DN26656_c0_g1	unitig_748	4609756	4610153	398	1	1
TRINITY_DN26948_c0_g1	unitig_22	992652	992964	313	1	1
TRINITY_DN26966_c0_g1	unitig_88	25440	25765	326	1	1
TRINITY_DN27532_c0_g1	unitig_699	2950534	2950824	291	1	1
TRINITY_DN30875_c0_g1	unitig_92	70133	70554	422	1	1
TRINITY_DN30891_c0_g1	unitig_22	4541644	4541995	352	1	1
TRINITY_DN30960_c0_g1	unitig_32	962939	963230	292	1	1
TRINITY_DN31302_c0_g1	unitig_748	1247226	1247459	234	1	1
TRINITY_DN10670_c0_g5	unitig_699	1641425	1641978	447	1	2
TRINITY_DN12088_c0_g2	unitig_0	8371466	8372421	763	1	3
TRINITY_DN122_c0_g1	unitig_37	1849508	1850256	670	-1	2
TRINITY_DN15632_c0_g1	unitig_899	3437975	3438523	549	1	1
TRINITY_DN16775_c0_g1	unitig_37	2353238	2353563	326	1	1
TRINITY_DN1711_c0_g1	unitig_32	53189	53823	635	1	1
TRINITY_DN17441_c0_g1	unitig_52	2124612	2124989	378	1	1
TRINITY_DN19458_c0_g1	unitig_0	3606632	3606941	310	1	1
TRINITY_DN20615_c0_g1	unitig_699	2299069	2301259	836	-1	6
TRINITY_DN22945_c0_g1	unitig_61	1660460	1660784	325	1	1
TRINITY_DN23242_c0_g1	unitig_699	2464292	2464528	237	1	1
TRINITY_DN23274_c0_g1	unitig_749	1391125	1391644	520	1	1
TRINITY_DN25123_c0_g1	unitig_26	3400282	3400559	279	1	1
TRINITY_DN26341_c0_g1	unitig_22	5999989	6000542	554	1	1
TRINITY_DN26743_c0_g1	unitig_899	2099645	2100132	366	-1	2
TRINITY_DN29913_c0_g1	unitig_60	234961	235432	472	1	1
TRINITY_DN30221_c0_g1	unitig_22	865547	866220	674	1	1
TRINITY_DN31202_c0_g1	unitig_22	5936518	5936879	362	1	1
TRINITY_DN3499_c0_g1	unitig_747	737814	738211	405	1	1
TRINITY_DN12123_c0_g3	unitig_578	1486865	1487273	409	1	1
TRINITY_DN13375_c0_g1	unitig_46	2296481	2296804	324	1	1
TRINITY_DN16083_c0_g1	unitig_61	816643	817003	361	1	1
TRINITY_DN1690_c0_g1	unitig_749	3424139	3424478	340	1	1
TRINITY_DN17521_c0_g1	unitig_0	7811661	7812023	363	1	1
TRINITY_DN17620_c0_g1	unitig_0	1959803	1960077	275	1	1
TRINITY_DN18318_c0_g1	unitig_60	320574	321255	682	1	1
TRINITY_DN18834_c0_g1	unitig_748	647954	648211	258	1	1
TRINITY_DN19304_c0_g1	unitig_27	1827267	1827681	415	1	1
TRINITY_DN19870_c0_g1	unitig_0	6724447	6724708	262	1	1
TRINITY_DN20023_c0_g1	unitig_37	32215	32481	267	1	1
TRINITY_DN22212_c0_g1	unitig_699	2946778	2947251	474	1	1
TRINITY_DN2233_c0_g1	unitig_8	546747	547226	414	-1	2
TRINITY_DN24815_c0_g1	unitig_21	2427774	2428049	276	1	1
TRINITY_DN26636_c0_g1	unitig_0	1946447	1946857	411	1	1
TRINITY_DN27827_c0_g1	unitig_26	3385805	3386314	510	1	1
TRINITY_DN28506_c0_g1	unitig_748	5298010	5298277	268	1	1
TRINITY_DN29536_c0_g1	unitig_21	2135202	2135644	443	1	1
TRINITY_DN30559_c0_g1	unitig_746	777649	778143	367	-1	2
TRINITY_DN31247_c0_g1	unitig_578	3181507	3182705	1103	-1	2
TRINITY_DN31677_c0_g1	unitig_32	916360	916734	313	-1	2
TRINITY_DN3240_c0_g1	unitig_26	2723878	2725534	942	-1	3
TRINITY_DN3297_c1_g1	unitig_26	3045220	3045421	319	1	1
TRINITY_DN4045_c0_g1	unitig_747	702493	703059	567	1	1
TRINITY_DN4394_c0_g1	unitig_749	2818436	2818749	314	1	1
TRINITY_DN4872_c0_g2	unitig_748	1332425	1333008	584	1	1
TRINITY_DN4966_c0_g1	unitig_749	2652264	2653828	1398	-1	3
TRINITY_DN5616_c0_g1	unitig_52	2226674	2227419	746	1	1
TRINITY_DN5950_c0_g1	unitig_52	2033384	2034316	842	-1	2
TRINITY_DN12840_c0_g1	unitig_26	4348824	4349125	302	1	1
TRINITY_DN13237_c0_g1	unitig_748	926067	926356	290	1	1
TRINITY_DN13443_c0_g1	unitig_52	2356645	2356895	251	1	1
TRINITY_DN15522_c0_g1	unitig_32	3715817	3716337	524	1	1
TRINITY_DN15844_c0_g1	unitig_62	1015214	1015502	289	1	1
TRINITY_DN16187_c0_g1	unitig_744	2417422	2417802	381	1	1
TRINITY_DN1626_c0_g2	unitig_32	131077	132055	654	1	2
TRINITY_DN16424_c0_g1	unitig_61	1386576	1386909	335	1	1
TRINITY_DN17105_c0_g1	unitig_26	1970973	1971274	303	1	1
TRINITY_DN18250_c0_g1	unitig_0	6568608	6569817	416	-1	5
TRINITY_DN18761_c0_g1	unitig_899	2883949	2884259	311	1	1
TRINITY_DN19190_c0_g1	unitig_699	1346685	1346916	232	1	1
TRINITY_DN20565_c0_g1	unitig_22	4325531	4325816	296	1	1
TRINITY_DN22531_c0_g1	unitig_0	2839717	2840244	528	1	1
TRINITY_DN22925_c0_g1	unitig_22	5590788	5591118	331	1	1
TRINITY_DN24237_c0_g1	unitig_61	546433	546831	399	1	1
TRINITY_DN27467_c0_g1	unitig_22	5944777	5945084	308	1	1
TRINITY_DN30521_c0_g1	unitig_85	479451	479942	492	1	1
TRINITY_DN30919_c0_g1	unitig_744	1256897	1257451	555	1	1
TRINITY_DN31233_c0_g1	unitig_61	913686	914000	315	1	1
TRINITY_DN31578_c0_g1	unitig_899	1986314	1986629	316	1	1
TRINITY_DN32083_c0_g1	unitig_8	2197440	2197945	343	1	3
TRINITY_DN32287_c0_g1	unitig_744	1594057	1594366	310	1	1
TRINITY_DN4315_c0_g2	unitig_52	2739339	2739569	297	-1	4
TRINITY_DN11071_c0_g2	unitig_578	2142520	2142834	315	1	1
TRINITY_DN1209_c0_g1	unitig_744	1065954	1066448	495	1	1
TRINITY_DN12741_c0_g1	unitig_26	2469888	2470813	701	-1	2
TRINITY_DN13977_c0_g1	unitig_744	2330815	2331378	486	-1	2
TRINITY_DN14622_c0_g1	unitig_699	2948120	2948699	381	-1	3
TRINITY_DN15204_c0_g1	unitig_747	1447744	1448110	367	1	1
TRINITY_DN15281_c0_g1	unitig_899	2163639	2164294	656	1	1
TRINITY_DN153_c0_g2	unitig_37	1058873	1059189	317	1	1
TRINITY_DN16047_c0_g1	unitig_748	1702378	1702700	323	1	1
TRINITY_DN17609_c0_g1	unitig_0	1648378	1648801	424	1	1
TRINITY_DN17853_c0_g1	unitig_37	3080641	3080876	236	1	1
TRINITY_DN20534_c0_g1	unitig_747	1159735	1160145	411	1	1
TRINITY_DN21001_c0_g1	unitig_60	893093	893348	256	1	1
TRINITY_DN21451_c0_g1	unitig_32	1323440	1323820	381	1	1
TRINITY_DN23017_c0_g1	unitig_899	2298379	2298692	314	1	1
TRINITY_DN23126_c0_g1	unitig_746	775540	776150	611	1	1
TRINITY_DN23727_c0_g1	unitig_748	1012921	1013303	384	1	1
TRINITY_DN26399_c0_g1	unitig_26	2091667	2092410	523	-1	2
TRINITY_DN27100_c1_g1	unitig_52	1756729	1757265	537	1	1
TRINITY_DN27145_c0_g1	unitig_22	2815182	2815491	310	1	1
TRINITY_DN27519_c0_g1	unitig_747	1544148	1544518	371	1	1
TRINITY_DN28047_c0_g1	unitig_749	2383375	2383948	574	1	1
TRINITY_DN28112_c0_g1	unitig_748	1088081	1088391	312	1	1
TRINITY_DN28144_c0_g1	unitig_0	7169668	7169990	323	1	1
TRINITY_DN31589_c0_g1	unitig_749	1741877	1742181	305	1	1
TRINITY_DN32213_c0_g1	unitig_32	3312113	3312735	623	1	1
TRINITY_DN32338_c0_g1	unitig_62	1108905	1109255	351	1	1
TRINITY_DN4097_c0_g2	unitig_37	1582774	1583005	232	1	1
TRINITY_DN10610_c0_g2	unitig_748	3200286	3200668	383	1	1
TRINITY_DN10897_c1_g1	unitig_746	767364	768285	933	-1	1
TRINITY_DN11452_c1_g1	unitig_37	1159929	1160186	258	1	1
TRINITY_DN13995_c0_g1	unitig_37	1272039	1272272	234	1	1
TRINITY_DN1596_c0_g1	unitig_0	725045	725324	280	1	1
TRINITY_DN16153_c0_g1	unitig_699	2306873	2307578	706	1	1
TRINITY_DN16749_c0_g1	unitig_85	522902	523140	239	1	1
TRINITY_DN19227_c0_g1	unitig_744	1324303	1324590	288	1	1
TRINITY_DN19259_c0_g1	unitig_0	2575931	2576252	322	1	1
TRINITY_DN19994_c0_g1	unitig_746	903059	903392	334	1	1
TRINITY_DN2013_c0_g2	unitig_21	1002872	1003782	911	1	1
TRINITY_DN20322_c0_g1	unitig_32	500267	500627	361	1	1
TRINITY_DN211_c0_g1	unitig_736	666554	667784	1274	-1	1
TRINITY_DN23179_c0_g1	unitig_61	1038677	1039032	356	1	1
TRINITY_DN23730_c0_g1	unitig_746	170601	171355	755	1	1
TRINITY_DN24061_c0_g1	unitig_32	1393149	1393393	248	1	1
TRINITY_DN24549_c0_g1	unitig_748	790058	790333	276	1	1
TRINITY_DN26494_c0_g1	unitig_746	529570	530369	547	1	2
TRINITY_DN27576_c0_g1	unitig_22	6057980	6058431	370	1	2
TRINITY_DN30800_c0_g1	unitig_52	636051	636479	448	-1	1
TRINITY_DN31515_c0_g1	unitig_749	1378096	1378425	330	1	1
TRINITY_DN534_c0_g1	unitig_0	4361507	4361991	357	-1	2
TRINITY_DN10692_c1_g1	unitig_22	1084070	1084652	502	-1	2
TRINITY_DN10799_c1_g1	unitig_578	3193601	3193977	377	1	1
TRINITY_DN12670_c0_g1	unitig_0	2876300	2877116	709	-1	2
TRINITY_DN13620_c0_g1	unitig_0	6469682	6469965	284	1	1
TRINITY_DN13890_c0_g1	unitig_27	1975651	1975883	233	1	1
TRINITY_DN14106_c0_g1	unitig_85	62872	63183	312	1	1
TRINITY_DN14123_c0_g1	unitig_26	2566259	2566631	373	1	1
TRINITY_DN14636_c0_g1	unitig_699	2890334	2890867	535	1	1
TRINITY_DN15414_c0_g1	unitig_0	6266897	6267213	317	1	1
TRINITY_DN16547_c0_g1	unitig_899	1611174	1611537	364	1	1
TRINITY_DN16906_c0_g1	unitig_0	288910	289338	429	1	1
TRINITY_DN18602_c0_g1	unitig_736	572184	572543	360	1	1
TRINITY_DN19163_c0_g1	unitig_22	5708055	5708757	703	1	1
TRINITY_DN19561_c0_g1	unitig_27	1634371	1634745	375	1	1
TRINITY_DN19973_c0_g1	unitig_62	2513231	2513862	632	1	1
TRINITY_DN20253_c0_g1	unitig_46	2422263	2422629	367	1	1
TRINITY_DN20536_c0_g1	unitig_0	7014290	7014850	562	1	1
TRINITY_DN20738_c0_g1	unitig_899	2172559	2173030	355	-1	2
TRINITY_DN22340_c0_g1	unitig_0	1599583	1599967	386	1	1
TRINITY_DN22777_c0_g2	unitig_0	7719134	7719437	304	1	1
TRINITY_DN23137_c0_g1	unitig_22	4390911	4391330	420	1	1
TRINITY_DN23834_c0_g1	unitig_62	369134	369552	419	1	1
TRINITY_DN23937_c0_g1	unitig_748	4260753	4260957	214	1	1
TRINITY_DN24494_c0_g1	unitig_578	1184957	1185300	349	1	1
TRINITY_DN24900_c0_g1	unitig_736	1243191	1243777	587	1	1
TRINITY_DN25823_c0_g1	unitig_26	2966316	2966828	513	1	1
TRINITY_DN26101_c0_g1	unitig_21	1455914	1456233	320	1	1
TRINITY_DN26547_c0_g1	unitig_32	1493230	1493770	541	1	1
TRINITY_DN27805_c0_g1	unitig_699	2427106	2427424	319	1	1
TRINITY_DN28239_c0_g1	unitig_21	2583375	2583655	281	1	1
TRINITY_DN29290_c0_g1	unitig_699	1306339	1306827	387	1	2
TRINITY_DN30019_c0_g1	unitig_85	559300	559911	548	-1	2
TRINITY_DN30101_c0_g1	unitig_699	624259	624920	662	1	1
TRINITY_DN30357_c0_g1	unitig_27	1472912	1473427	516	1	1
TRINITY_DN30804_c0_g1	unitig_21	2082353	2083106	754	1	1
TRINITY_DN31028_c0_g1	unitig_85	238270	238747	478	1	1
TRINITY_DN31207_c0_g1	unitig_0	8402408	8403553	560	1	2
TRINITY_DN31283_c0_g1	unitig_62	1921674	1921955	282	1	1
TRINITY_DN31374_c1_g1	unitig_899	2660816	2661181	377	1	1
TRINITY_DN31747_c0_g1	unitig_736	2037185	2037581	398	1	1
TRINITY_DN31964_c0_g1	unitig_52	2025706	2026310	401	1	2
TRINITY_DN32122_c0_g1	unitig_8	6120418	6121006	490	1	2
TRINITY_DN4456_c0_g2	unitig_748	4906482	4906923	442	1	1
TRINITY_DN10031_c0_g1	unitig_22	3666980	3669113	2134	1	1
TRINITY_DN10397_c1_g1	unitig_749	2099144	2099474	335	1	1
TRINITY_DN10863_c0_g3	unitig_749	3246252	3246704	453	1	1
TRINITY_DN12105_c0_g1	unitig_52	3224650	3225785	805	-1	5
TRINITY_DN12873_c0_g1	unitig_0	8230066	8230458	393	1	1
TRINITY_DN13760_c0_g1	unitig_37	259283	259545	263	1	1
TRINITY_DN14328_c0_g1	unitig_22	691150	691468	324	1	1
TRINITY_DN15258_c0_g1	unitig_32	641002	641596	595	1	1
TRINITY_DN17499_c0_g1	unitig_52	3103995	3104267	273	1	1
TRINITY_DN18010_c0_g1	unitig_744	1529082	1529480	399	1	1
TRINITY_DN18814_c0_g1	unitig_22	5576303	5576765	463	1	1
TRINITY_DN19085_c0_g1	unitig_62	1281912	1282223	312	1	1
TRINITY_DN19198_c0_g1	unitig_62	1564356	1564573	218	1	1
TRINITY_DN19275_c0_g1	unitig_32	788027	788571	545	1	1
TRINITY_DN19486_c0_g1	unitig_748	151885	152162	278	1	1
TRINITY_DN19541_c0_g1	unitig_22	2848864	2849443	580	1	1
TRINITY_DN1965_c0_g2	unitig_61	510901	511287	387	1	1
TRINITY_DN20448_c0_g1	unitig_0	3188787	3189016	237	1	1
TRINITY_DN20479_c0_g1	unitig_749	1208553	1208993	441	1	1
TRINITY_DN20721_c0_g1	unitig_52	3113794	3114221	428	1	1
TRINITY_DN2229_c0_g1	unitig_699	2828936	2829303	369	1	1
TRINITY_DN23432_c0_g1	unitig_749	227778	228163	386	1	1
TRINITY_DN23450_c0_g1	unitig_21	1188042	1188353	312	1	1
TRINITY_DN2345_c0_g2	unitig_32	3564522	3564877	362	1	1
TRINITY_DN23593_c0_g1	unitig_88	417844	418289	446	1	1
TRINITY_DN23702_c0_g1	unitig_26	1423793	1424361	569	1	1
TRINITY_DN23824_c0_g1	unitig_32	651712	651957	246	1	1
TRINITY_DN24106_c0_g1	unitig_8	1468059	1468505	278	-1	2
TRINITY_DN24142_c0_g1	unitig_749	2239123	2239634	512	1	1
TRINITY_DN24218_c0_g1	unitig_22	881138	881441	304	1	1
TRINITY_DN24769_c0_g1	unitig_746	371869	372331	463	1	1
TRINITY_DN25053_c0_g1	unitig_749	2196052	2196610	474	-1	2
TRINITY_DN25231_c0_g1	unitig_26	3055704	3055994	291	1	1
TRINITY_DN25958_c0_g1	unitig_736	893636	894024	389	1	1
TRINITY_DN27763_c0_g1	unitig_27	1762402	1762757	356	1	1
TRINITY_DN27785_c0_g1	unitig_21	1533745	1534240	496	1	1
TRINITY_DN27804_c0_g1	unitig_25	21141	21842	578	1	2
TRINITY_DN28032_c0_g1	unitig_27	2010159	2010547	389	1	1
TRINITY_DN28722_c0_g2	unitig_749	1843775	1844103	329	1	1
TRINITY_DN29613_c0_g1	unitig_46	2033885	2034244	368	1	1
TRINITY_DN29920_c0_g1	unitig_61	280027	280518	492	1	1
TRINITY_DN30087_c0_g1	unitig_748	4339155	4339574	420	1	1
TRINITY_DN30746_c0_g1	unitig_61	601393	601721	329	1	1
TRINITY_DN3676_c0_g2	unitig_578	1074321	1074824	508	1	1
TRINITY_DN4061_c0_g1	unitig_92	403825	404479	655	1	1
TRINITY_DN5311_c0_g2	unitig_0	3705469	3706060	592	1	1
TRINITY_DN11094_c1_g1	unitig_699	2841820	2842167	348	1	1
TRINITY_DN11296_c0_g1	unitig_60	103000	104926	1927	1	1
TRINITY_DN11679_c1_g1	unitig_750	28358	29015	658	1	1
TRINITY_DN13657_c0_g1	unitig_578	2364925	2365351	427	1	1
TRINITY_DN15300_c0_g1	unitig_26	3560719	3561131	413	1	1
TRINITY_DN15501_c0_g1	unitig_699	2459320	2459686	367	1	1
TRINITY_DN15702_c0_g1	unitig_22	5782990	5783560	571	1	1
TRINITY_DN1576_c0_g1	unitig_0	7256162	7256611	450	1	1
TRINITY_DN16446_c0_g1	unitig_699	1817709	1818026	318	1	1
TRINITY_DN17406_c0_g1	unitig_736	1569425	1569654	251	1	1
TRINITY_DN17491_c0_g1	unitig_0	7649983	7650498	516	1	1
TRINITY_DN18193_c0_g1	unitig_27	936567	936815	249	1	1
TRINITY_DN18382_c0_g1	unitig_744	965525	966067	435	-1	2
TRINITY_DN19388_c0_g1	unitig_748	107347	107690	344	1	1
TRINITY_DN20394_c0_g1	unitig_748	1592485	1592848	364	1	1
TRINITY_DN20623_c0_g1	unitig_26	17772	18066	295	1	1
TRINITY_DN21054_c0_g1	unitig_27	850155	850408	254	1	1
TRINITY_DN21384_c0_g1	unitig_746	90048	90320	273	1	1
TRINITY_DN21970_c0_g1	unitig_61	958498	958748	273	-1	2
TRINITY_DN22553_c0_g1	unitig_8	2855139	2855832	389	1	4
TRINITY_DN22948_c0_g1	unitig_32	2130145	2132784	404	1	3
TRINITY_DN23003_c0_g1	unitig_748	851548	852206	318	1	2
TRINITY_DN23121_c0_g1	unitig_8	6547273	6547867	521	1	2
TRINITY_DN23164_c0_g1	unitig_32	3514387	3514800	414	1	1
TRINITY_DN24020_c0_g1	unitig_0	3176904	3177280	380	1	1
TRINITY_DN24064_c0_g1	unitig_22	1903669	1904111	443	1	1
TRINITY_DN24092_c0_g1	unitig_578	3523387	3523746	360	1	1
TRINITY_DN24447_c0_g1	unitig_749	1024205	1024613	409	1	1
TRINITY_DN27124_c0_g1	unitig_748	1545158	1545424	267	1	1
TRINITY_DN28170_c0_g1	unitig_0	7528429	7528754	326	1	1
TRINITY_DN28175_c0_g1	unitig_736	2389526	2390196	489	1	2
TRINITY_DN28472_c0_g1	unitig_21	228248	228508	261	1	1
TRINITY_DN29305_c0_g3	unitig_899	836251	837390	817	-1	4
TRINITY_DN30184_c0_g1	unitig_0	4723547	4723976	430	1	1
TRINITY_DN30542_c0_g1	unitig_27	1316982	1317190	209	1	1
TRINITY_DN30593_c0_g1	unitig_88	451548	452162	615	1	1
TRINITY_DN31867_c0_g1	unitig_0	291219	291458	240	1	1
TRINITY_DN32298_c0_g1	unitig_748	5336799	5337311	513	1	1
TRINITY_DN3539_c0_g2	unitig_0	2881601	2882268	668	1	1
TRINITY_DN5213_c1_g1	unitig_26	3377592	3377876	306	-1	1
TRINITY_DN12729_c0_g1	unitig_21	2619968	2620414	447	1	1
TRINITY_DN13503_c0_g1	unitig_46	943420	943916	497	1	1
TRINITY_DN13735_c0_g1	unitig_899	2336210	2336530	321	1	1
TRINITY_DN13742_c0_g1	unitig_60	34149	34398	252	1	1
TRINITY_DN14019_c0_g1	unitig_21	135497	135812	316	1	1
TRINITY_DN14766_c0_g1	unitig_21	2594984	2595609	626	1	1
TRINITY_DN15815_c0_g1	unitig_52	2081467	2081815	349	1	1
TRINITY_DN16095_c0_g1	unitig_26	4487597	4488009	413	1	1
TRINITY_DN16484_c0_g1	unitig_21	1573730	1574164	437	1	1
TRINITY_DN20304_c0_g1	unitig_27	1464126	1464572	447	1	1
TRINITY_DN20384_c0_g1	unitig_748	988056	988627	572	1	1
TRINITY_DN20580_c0_g1	unitig_52	1869404	1869823	420	1	1
TRINITY_DN20892_c0_g1	unitig_37	1875500	1875765	266	1	1
TRINITY_DN21059_c0_g1	unitig_747	1791969	1792242	274	1	1
TRINITY_DN21169_c0_g1	unitig_32	332777	333039	263	1	1
TRINITY_DN22715_c0_g1	unitig_21	1627306	1628388	1083	1	1
TRINITY_DN23621_c0_g1	unitig_60	163130	163450	321	1	1
TRINITY_DN23649_c0_g1	unitig_578	3310025	3310353	257	1	2
TRINITY_DN27191_c0_g1	unitig_899	3435668	3436027	360	1	1
TRINITY_DN27726_c0_g1	unitig_748	1127661	1127969	309	1	1
TRINITY_DN27854_c0_g1	unitig_46	1468142	1468413	272	1	1
TRINITY_DN28535_c0_g1	unitig_52	253745	254117	373	1	1
TRINITY_DN29788_c0_g1	unitig_744	2193408	2193754	557	1	1
TRINITY_DN30833_c0_g1	unitig_0	778154	778413	261	1	1
TRINITY_DN31022_c0_g1	unitig_736	745418	745950	533	1	1
TRINITY_DN31586_c0_g1	unitig_21	401364	401980	617	1	1
TRINITY_DN32093_c0_g1	unitig_60	1445171	1445447	277	1	1
TRINITY_DN3293_c0_g1	unitig_62	1446260	1447308	621	-1	2
TRINITY_DN3536_c0_g1	unitig_62	2452853	2453415	298	-1	2
TRINITY_DN4190_c0_g2	unitig_60	1422011	1422646	536	-1	2
TRINITY_DN4865_c1_g1	unitig_21	2434421	2434898	478	1	1
TRINITY_DN5161_c0_g2	unitig_749	2620931	2621467	227	-1	2
TRINITY_DN11983_c1_g1	unitig_21	1939916	1940448	533	1	1
TRINITY_DN11990_c2_g1	unitig_92	225616	226030	415	1	1
TRINITY_DN12359_c0_g1	unitig_0	3177319	3177592	274	1	1
TRINITY_DN12720_c0_g1	unitig_746	73072	73404	386	1	1
TRINITY_DN12863_c0_g1	unitig_26	1013742	1014352	456	1	2
TRINITY_DN13040_c0_g1	unitig_46	1870843	1871296	454	1	1
TRINITY_DN13159_c0_g1	unitig_748	156004	156615	493	1	2
TRINITY_DN13528_c0_g1	unitig_0	7515195	7515401	207	1	1
TRINITY_DN14702_c0_g1	unitig_699	1026064	1026335	272	1	1
TRINITY_DN14848_c0_g1	unitig_578	546561	547102	483	-1	2
TRINITY_DN14906_c0_g1	unitig_22	3065667	3066081	415	1	1
TRINITY_DN15199_c0_g1	unitig_736	1123255	1123702	448	1	1
TRINITY_DN15395_c0_g1	unitig_744	1718257	1718477	221	1	1
TRINITY_DN15541_c0_g1	unitig_52	2874311	2874700	390	1	1
TRINITY_DN16150_c0_g1	unitig_32	5840	6204	365	1	1
TRINITY_DN16163_c0_g1	unitig_92	263841	264112	272	1	1
TRINITY_DN16196_c0_g1	unitig_749	1599795	1600091	297	1	1
TRINITY_DN16201_c0_g1	unitig_85	702543	703185	647	1	1
TRINITY_DN17390_c0_g1	unitig_699	2187659	2187903	245	1	1
TRINITY_DN17447_c0_g1	unitig_0	1582555	1582873	319	1	1
TRINITY_DN17478_c0_g1	unitig_52	449650	449883	234	1	1
TRINITY_DN18247_c0_g1	unitig_748	2229276	2229843	568	1	1
TRINITY_DN19139_c0_g1	unitig_26	45545	46127	378	-1	3
TRINITY_DN19532_c0_g1	unitig_0	3874614	3875080	467	1	1
TRINITY_DN19564_c0_g1	unitig_578	3214820	3215088	269	1	1
TRINITY_DN19616_c0_g1	unitig_62	1845365	1845778	414	1	1
TRINITY_DN19884_c0_g1	unitig_748	4161547	4162138	592	1	1
TRINITY_DN1993_c0_g1	unitig_32	995004	995755	685	-1	2
TRINITY_DN20319_c0_g1	unitig_61	1223584	1223914	331	1	1
TRINITY_DN20504_c0_g1	unitig_749	751559	752019	461	1	1
TRINITY_DN21310_c0_g1	unitig_32	3277472	3277855	274	1	2
TRINITY_DN21404_c0_g1	unitig_26	3156263	3156548	286	1	1
TRINITY_DN21512_c0_g1	unitig_46	508876	509179	253	-1	2
TRINITY_DN21566_c0_g1	unitig_27	1974459	1974680	222	1	1
TRINITY_DN22507_c0_g1	unitig_578	1625242	1625746	505	1	1
TRINITY_DN22922_c0_g1	unitig_699	1522866	1523181	316	1	1
TRINITY_DN23057_c0_g1	unitig_736	320727	321057	331	1	1
TRINITY_DN23134_c0_g1	unitig_578	2043945	2044217	273	1	1
TRINITY_DN23270_c0_g1	unitig_748	5102427	5102936	423	-1	2
TRINITY_DN23468_c0_g1	unitig_744	1227278	1227571	296	1	1
TRINITY_DN23716_c0_g1	unitig_52	1713016	1713647	632	1	1
TRINITY_DN24205_c0_g1	unitig_52	2487610	2488097	490	1	1
TRINITY_DN24804_c0_g1	unitig_37	1643983	1644327	345	1	1
TRINITY_DN26446_c0_g1	unitig_748	5411187	5411558	372	1	1
TRINITY_DN26549_c0_g1	unitig_26	862532	863627	506	-1	2
TRINITY_DN2672_c0_g1	unitig_747	1474965	1476186	517	1	2
TRINITY_DN27040_c0_g1	unitig_22	323743	324273	538	1	1
TRINITY_DN27170_c0_g1	unitig_0	349201	349482	282	1	1
TRINITY_DN27554_c0_g1	unitig_749	3377025	3377583	559	1	1
TRINITY_DN27823_c0_g1	unitig_0	4257941	4258304	364	1	1
TRINITY_DN28335_c0_g1	unitig_88	311262	311819	558	1	1
TRINITY_DN28541_c0_g1	unitig_26	3665570	3665895	326	1	1
TRINITY_DN28544_c0_g1	unitig_0	7302481	7302776	216	1	2
TRINITY_DN28608_c0_g1	unitig_899	2604271	2604562	292	1	1
TRINITY_DN30384_c0_g1	unitig_85	480012	480350	339	1	1
TRINITY_DN30446_c0_g1	unitig_899	2201113	2201451	339	1	1
TRINITY_DN30452_c0_g1	unitig_749	2252329	2252611	283	1	1
TRINITY_DN3058_c0_g1	unitig_22	3846567	3846838	272	1	1
TRINITY_DN30705_c0_g1	unitig_37	496076	496491	416	1	1
TRINITY_DN30924_c0_g1	unitig_85	414990	415378	389	1	1
TRINITY_DN30991_c0_g1	unitig_0	1547696	1548382	687	1	1
TRINITY_DN31162_c0_g1	unitig_27	1338293	1338763	471	1	1
TRINITY_DN3138_c0_g2	unitig_52	363237	363548	312	1	1
TRINITY_DN31663_c0_g1	unitig_736	392571	392993	423	1	1
TRINITY_DN32459_c0_g1	unitig_748	3209294	3209578	285	1	1
TRINITY_DN3286_c0_g2	unitig_26	2956866	2957431	393	-1	3
TRINITY_DN10402_c1_g1	unitig_32	150746	150968	223	1	1
TRINITY_DN12487_c0_g1	unitig_899	412844	413163	320	1	1
TRINITY_DN12847_c0_g1	unitig_52	2230314	2230731	418	1	1
TRINITY_DN12854_c0_g1	unitig_52	2737978	2739222	389	-1	4
TRINITY_DN12961_c0_g1	unitig_22	2594356	2595146	791	1	1
TRINITY_DN1301_c0_g1	unitig_37	2395235	2395970	529	-1	2
TRINITY_DN13114_c0_g1	unitig_26	3082966	3083475	510	1	1
TRINITY_DN13943_c0_g1	unitig_26	2464247	2464552	308	1	1
TRINITY_DN14627_c0_g1	unitig_747	279597	280299	703	1	1
TRINITY_DN15485_c0_g1	unitig_0	1127775	1128129	355	1	1
TRINITY_DN16912_c0_g1	unitig_746	139877	140122	246	1	1
TRINITY_DN18024_c0_g1	unitig_748	4852307	4852979	548	1	2
TRINITY_DN18107_c0_g1	unitig_0	5490770	5491173	315	1	2
TRINITY_DN18954_c0_g1	unitig_578	1566023	1566567	545	1	1
TRINITY_DN19243_c0_g1	unitig_61	915368	915601	234	1	1
TRINITY_DN20723_c0_g1	unitig_699	1422795	1423067	273	1	1
TRINITY_DN20731_c0_g1	unitig_899	2033914	2034452	539	1	1
TRINITY_DN20790_c0_g1	unitig_578	1836512	1837121	328	-1	3
TRINITY_DN21065_c0_g1	unitig_22	4623264	4623995	394	1	2
TRINITY_DN21212_c0_g1	unitig_26	3335210	3335559	350	1	1
TRINITY_DN21371_c0_g1	unitig_699	1767715	1767978	264	1	1
TRINITY_DN21571_c0_g1	unitig_744	1957529	1957782	254	1	1
TRINITY_DN22582_c0_g1	unitig_748	1042824	1043136	313	1	1
TRINITY_DN23792_c0_g1	unitig_27	1106870	1107255	386	1	1
TRINITY_DN23882_c0_g1	unitig_578	2143333	2143631	299	1	1
TRINITY_DN23904_c0_g1	unitig_26	3241965	3242245	281	1	1
TRINITY_DN24251_c0_g1	unitig_578	3226201	3226649	449	1	1
TRINITY_DN24462_c0_g1	unitig_899	2742292	2742793	241	1	3
TRINITY_DN25742_c0_g1	unitig_699	1193328	1193681	354	1	1
TRINITY_DN25777_c0_g1	unitig_32	3767288	3767585	204	-1	2
TRINITY_DN26095_c0_g1	unitig_744	1417429	1418207	781	1	1
TRINITY_DN28273_c0_g1	unitig_747	965498	965840	343	1	1
TRINITY_DN28626_c0_g1	unitig_22	5157521	5157746	226	1	1
TRINITY_DN30651_c0_g1	unitig_22	4295895	4296243	356	1	1
TRINITY_DN30739_c0_g1	unitig_21	365240	365463	224	1	1
TRINITY_DN31128_c0_g1	unitig_37	1542413	1542660	248	1	1
TRINITY_DN31189_c0_g1	unitig_22	4180264	4180582	319	1	1
TRINITY_DN31309_c0_g1	unitig_747	2517450	2517804	355	1	1
TRINITY_DN31317_c0_g1	unitig_61	438452	438655	204	1	1
TRINITY_DN31485_c0_g1	unitig_60	945294	945665	372	1	1
TRINITY_DN31552_c0_g1	unitig_32	2667967	2668329	363	1	1
TRINITY_DN3179_c0_g1	unitig_46	1815441	1815832	310	-1	2
TRINITY_DN32317_c0_g1	unitig_747	1599753	1600078	326	1	1
TRINITY_DN32390_c0_g1	unitig_21	689323	689593	271	1	1
TRINITY_DN3406_c0_g1	unitig_747	2015703	2016072	370	1	1
TRINITY_DN4082_c0_g1	unitig_46	1976123	1976864	743	1	1
TRINITY_DN1072_c1_g1	unitig_52	1746352	1746856	505	1	1
TRINITY_DN10803_c0_g3	unitig_0	1609518	1609813	226	-1	2
TRINITY_DN11029_c0_g1	unitig_88	574101	574579	400	1	2
TRINITY_DN1104_c0_g1	unitig_736	435134	435731	598	1	1
TRINITY_DN12573_c0_g1	unitig_37	1017730	1019216	1159	1	2
TRINITY_DN13530_c0_g1	unitig_578	2809805	2810162	358	1	1
TRINITY_DN13928_c0_g1	unitig_26	4377104	4377405	302	1	1
TRINITY_DN14149_c0_g1	unitig_699	2725167	2725408	243	1	1
TRINITY_DN1437_c0_g1	unitig_899	1810116	1810873	289	1	2
TRINITY_DN14874_c0_g1	unitig_748	5537889	5538589	526	1	3
TRINITY_DN15548_c0_g1	unitig_750	231769	232139	371	1	1
TRINITY_DN15742_c0_g1	unitig_26	1425216	1425526	318	1	1
TRINITY_DN15904_c0_g1	unitig_749	573336	573633	298	1	1
TRINITY_DN16879_c0_g1	unitig_748	2727075	2727474	400	1	1
TRINITY_DN18894_c0_g1	unitig_60	401231	401576	346	1	1
TRINITY_DN19826_c0_g1	unitig_37	1573587	1573968	382	1	1
TRINITY_DN20010_c0_g1	unitig_22	5079885	5080597	713	1	1
TRINITY_DN20275_c0_g1	unitig_22	685276	685567	292	1	1
TRINITY_DN20494_c0_g1	unitig_578	3215280	3215662	383	1	1
TRINITY_DN21026_c0_g1	unitig_736	989597	989987	398	1	1
TRINITY_DN21569_c0_g1	unitig_32	417282	417544	263	1	1
TRINITY_DN21575_c0_g1	unitig_749	894958	895215	258	1	1
TRINITY_DN22096_c0_g1	unitig_0	4252652	4252945	294	1	1
TRINITY_DN22290_c0_g1	unitig_0	4550233	4550499	269	1	1
TRINITY_DN22676_c0_g1	unitig_26	1647421	1647693	273	1	1
TRINITY_DN23291_c0_g1	unitig_32	1493768	1494097	330	1	1
TRINITY_DN23700_c0_g1	unitig_578	3378838	3379360	523	1	1
TRINITY_DN23885_c0_g1	unitig_748	5308071	5308349	298	1	1
TRINITY_DN24223_c0_g1	unitig_26	499997	500298	302	1	1
TRINITY_DN24481_c0_g1	unitig_22	244768	245123	372	-1	1
TRINITY_DN24573_c0_g1	unitig_748	4469567	4470599	346	-1	3
TRINITY_DN24773_c0_g1	unitig_899	836589	836851	263	1	1
TRINITY_DN24923_c0_g1	unitig_21	1462831	1463088	258	1	1
TRINITY_DN25240_c0_g1	unitig_21	141496	141803	308	1	1
TRINITY_DN25797_c0_g1	unitig_90	58943	59190	248	1	1
TRINITY_DN26668_c0_g1	unitig_27	1497270	1497766	497	1	1
TRINITY_DN2700_c0_g2	unitig_899	572097	572757	592	1	2
TRINITY_DN28677_c0_g1	unitig_699	1379988	1380633	308	1	4
TRINITY_DN2888_c0_g1	unitig_0	1047463	1048253	560	1	2
TRINITY_DN29257_c0_g1	unitig_46	2489733	2491112	1159	-1	2
TRINITY_DN29295_c0_g1	unitig_26	3576271	3576638	378	1	1
TRINITY_DN30326_c0_g1	unitig_22	1084633	1084963	331	1	1
TRINITY_DN30474_c0_g1	unitig_21	2461900	2462178	279	1	1
TRINITY_DN30683_c0_g1	unitig_37	633857	634393	537	1	1
TRINITY_DN30821_c0_g1	unitig_748	1591792	1592088	297	1	1
TRINITY_DN31185_c0_g1	unitig_747	1677027	1677308	282	1	1
TRINITY_DN31195_c0_g1	unitig_22	890410	890781	372	1	1
TRINITY_DN31595_c0_g1	unitig_37	1199232	1199513	282	1	1
TRINITY_DN5230_c0_g1	unitig_8	2842185	2843078	312	-1	3
TRINITY_DN5253_c0_g1	unitig_744	1762725	1763183	370	1	2
TRINITY_DN5407_c0_g1	unitig_26	1908844	1909191	348	1	1
TRINITY_DN5460_c0_g1	unitig_8	2182547	2183478	416	-1	2
TRINITY_DN10074_c0_g2	unitig_37	3380288	3381319	1032	1	1
TRINITY_DN10090_c2_g1	unitig_32	570956	571262	307	1	1
TRINITY_DN10320_c0_g1	unitig_746	798544	799911	1292	1	2
TRINITY_DN11358_c0_g2	unitig_92	254692	255016	325	1	1
TRINITY_DN12622_c0_g1	unitig_578	2604474	2605043	413	-1	2
TRINITY_DN13073_c0_g1	unitig_0	4959030	4959261	232	1	1
TRINITY_DN13457_c0_g1	unitig_749	1590511	1590831	328	1	1
TRINITY_DN13550_c0_g1	unitig_0	3921277	3921742	466	1	1
TRINITY_DN13570_c0_g1	unitig_88	496225	496576	358	1	1
TRINITY_DN13664_c0_g1	unitig_699	462850	463177	328	1	1
TRINITY_DN13682_c0_g1	unitig_748	1698484	1698771	288	1	1
TRINITY_DN13883_c0_g1	unitig_736	573755	574045	291	1	1
TRINITY_DN13907_c0_g1	unitig_62	1107650	1107901	252	1	1
TRINITY_DN14517_c0_g1	unitig_578	2151419	2151885	467	1	1
TRINITY_DN14543_c0_g1	unitig_578	2932569	2932974	406	1	1
TRINITY_DN15391_c0_g1	unitig_27	693988	694758	771	1	1
TRINITY_DN15649_c0_g1	unitig_52	1854674	1855365	692	1	1
TRINITY_DN15867_c0_g1	unitig_748	5010654	5010896	243	1	1
TRINITY_DN15900_c0_g1	unitig_27	1291939	1292182	244	1	1
TRINITY_DN16019_c0_g1	unitig_749	2693476	2693914	439	1	1
TRINITY_DN16052_c0_g1	unitig_747	2068231	2068647	417	1	1
TRINITY_DN16730_c0_g1	unitig_37	2565897	2566247	351	1	1
TRINITY_DN16799_c0_g1	unitig_37	2744511	2744747	237	1	1
TRINITY_DN17087_c0_g1	unitig_749	1116786	1117163	378	1	1
TRINITY_DN19088_c0_g1	unitig_699	2982195	2983389	631	1	3
TRINITY_DN19663_c0_g1	unitig_748	5412462	5413230	677	-1	2
TRINITY_DN19803_c0_g1	unitig_899	1174451	1174932	482	1	1
TRINITY_DN20773_c0_g1	unitig_736	650007	650229	223	1	1
TRINITY_DN21079_c0_g1	unitig_27	1819433	1819696	264	1	1
TRINITY_DN21331_c0_g1	unitig_0	1700337	1700637	301	1	1
TRINITY_DN21761_c0_g1	unitig_26	3381008	3381412	412	1	1
TRINITY_DN22248_c0_g1	unitig_62	1127741	1128478	661	-1	2
TRINITY_DN23561_c0_g1	unitig_32	3823553	3823857	305	1	1
TRINITY_DN23620_c0_g1	unitig_46	3281572	3281859	288	1	1
TRINITY_DN24207_c0_g1	unitig_22	4683693	4683943	251	1	1
TRINITY_DN24268_c0_g1	unitig_749	3282998	3283259	262	1	1
TRINITY_DN24376_c0_g1	unitig_21	1920473	1920905	433	1	1
TRINITY_DN24529_c0_g1	unitig_0	5412598	5413042	368	1	2
TRINITY_DN24539_c0_g1	unitig_22	6186179	6186418	241	1	1
TRINITY_DN24717_c0_g1	unitig_37	197253	198641	708	-1	3
TRINITY_DN24969_c0_g1	unitig_747	953357	953646	290	1	1
TRINITY_DN25844_c0_g1	unitig_748	647277	647907	631	1	1
TRINITY_DN25858_c0_g1	unitig_899	2112010	2112815	806	1	1
TRINITY_DN26774_c0_g1	unitig_749	1215663	1215918	256	1	1
TRINITY_DN26835_c0_g1	unitig_899	1549493	1549773	282	1	1
TRINITY_DN26924_c0_g1	unitig_37	1735492	1735718	227	1	1
TRINITY_DN27272_c0_g1	unitig_52	2144989	2145349	287	-1	2
TRINITY_DN27442_c0_g1	unitig_0	5678085	5678364	280	1	1
TRINITY_DN27459_c0_g1	unitig_32	489836	490415	580	1	1
TRINITY_DN27581_c0_g1	unitig_578	1555752	1556058	307	1	1
TRINITY_DN27619_c0_g1	unitig_748	1753072	1753722	392	-1	3
TRINITY_DN27674_c0_g1	unitig_749	3023891	3024180	290	1	1
TRINITY_DN2775_c0_g1	unitig_899	1875658	1876035	384	1	1
TRINITY_DN28050_c0_g1	unitig_899	2937251	2937479	229	1	1
TRINITY_DN28090_c0_g1	unitig_748	2066552	2066788	237	1	1
TRINITY_DN28339_c0_g1	unitig_32	2917524	2917887	364	1	1
TRINITY_DN28610_c0_g1	unitig_899	1663457	1663754	298	1	1
TRINITY_DN29942_c0_g1	unitig_899	3444324	3444631	314	1	1
TRINITY_DN30040_c0_g1	unitig_26	2760716	2761021	319	1	1
TRINITY_DN30465_c0_g1	unitig_26	77558	77841	284	1	1
TRINITY_DN30601_c0_g1	unitig_52	1785202	1785999	798	1	1
TRINITY_DN30972_c0_g1	unitig_22	5803328	5803565	238	1	1
TRINITY_DN31299_c0_g1	unitig_748	479644	479924	281	1	1
TRINITY_DN32324_c0_g1	unitig_748	4640451	4640864	414	1	1
TRINITY_DN3542_c1_g1	unitig_747	58948	59173	226	1	1
TRINITY_DN3669_c0_g1	unitig_578	2019337	2019710	374	1	1
TRINITY_DN3751_c0_g1	unitig_0	6942920	6943544	528	-1	2
TRINITY_DN4673_c0_g1	unitig_0	4957533	4957987	455	1	1
TRINITY_DN10375_c0_g2	unitig_37	1633293	1634031	339	-1	2
TRINITY_DN13182_c0_g1	unitig_699	3101787	3102123	259	1	2
TRINITY_DN13379_c0_g1	unitig_749	2354272	2354676	405	1	1
TRINITY_DN1353_c0_g1	unitig_32	3818172	3818566	395	1	1
TRINITY_DN13848_c0_g1	unitig_26	1304896	1305138	243	1	1
TRINITY_DN13862_c0_g1	unitig_26	426470	426816	347	1	1
TRINITY_DN14251_c0_g1	unitig_736	585782	586019	238	1	1
TRINITY_DN14965_c0_g1	unitig_46	2034292	2034605	314	1	1
TRINITY_DN15362_c0_g1	unitig_62	835759	836258	500	1	1
TRINITY_DN16991_c0_g1	unitig_0	696812	697104	293	1	1
TRINITY_DN17018_c0_g1	unitig_22	5450514	5450839	328	1	1
TRINITY_DN17824_c0_g1	unitig_26	3833137	3833350	214	1	1
TRINITY_DN18437_c0_g1	unitig_0	4663418	4663777	363	1	1
TRINITY_DN18884_c0_g1	unitig_0	88172	88525	354	1	1
TRINITY_DN19538_c0_g1	unitig_748	1445937	1446209	273	1	1
TRINITY_DN1_c0_g1	unitig_748	1011313	1011679	367	1	1
TRINITY_DN20342_c0_g1	unitig_0	1448411	1448822	412	1	1
TRINITY_DN206_c0_g1	unitig_8	541996	542315	352	-1	1
TRINITY_DN20994_c0_g1	unitig_46	383965	384442	478	1	1
TRINITY_DN21083_c0_g1	unitig_26	2618164	2618560	397	1	1
TRINITY_DN21202_c0_g1	unitig_899	1352537	1353003	467	1	1
TRINITY_DN21632_c0_g1	unitig_748	1487373	1487594	222	1	1
TRINITY_DN21807_c0_g1	unitig_748	2377372	2377740	369	1	1
TRINITY_DN22185_c0_g1	unitig_0	893465	893951	487	1	1
TRINITY_DN2231_c0_g1	unitig_736	822702	823119	419	1	1
TRINITY_DN22814_c0_g1	unitig_21	588485	588774	290	1	1
TRINITY_DN23447_c0_g1	unitig_61	1105634	1105854	221	1	1
TRINITY_DN23518_c0_g1	unitig_26	3087958	3088463	506	1	1
TRINITY_DN23640_c0_g1	unitig_747	1621990	1622389	400	1	1
TRINITY_DN23654_c0_g1	unitig_32	52769	53460	378	1	3
TRINITY_DN23890_c0_g1	unitig_736	498565	498867	303	1	1
TRINITY_DN24803_c0_g1	unitig_899	1214354	1214594	241	1	1
TRINITY_DN25250_c0_g1	unitig_27	1354830	1355077	250	1	1
TRINITY_DN25637_c0_g1	unitig_60	166926	167226	301	1	1
TRINITY_DN25890_c0_g1	unitig_747	1524000	1524727	729	1	1
TRINITY_DN26853_c0_g1	unitig_749	2045573	2045854	282	1	1
TRINITY_DN27069_c0_g1	unitig_699	2622462	2622891	430	1	1
TRINITY_DN27903_c0_g1	unitig_46	2226419	2226664	246	1	1
TRINITY_DN2818_c0_g2	unitig_0	1961346	1962193	848	1	1
TRINITY_DN28316_c0_g1	unitig_749	1089677	1090096	421	1	1
TRINITY_DN28539_c0_g1	unitig_699	2621523	2621740	218	1	1
TRINITY_DN28555_c0_g1	unitig_26	2690470	2690749	280	1	1
TRINITY_DN28681_c0_g1	unitig_0	4663826	4664099	274	1	1
TRINITY_DN28988_c0_g1	unitig_749	1184620	1185112	410	-1	2
TRINITY_DN29397_c0_g1	unitig_61	574311	574688	378	1	1
TRINITY_DN30196_c0_g1	unitig_32	3105217	3105764	549	1	1
TRINITY_DN30210_c0_g1	unitig_748	381864	382244	381	1	1
TRINITY_DN30535_c0_g1	unitig_21	1435192	1435458	267	1	1
TRINITY_DN31268_c0_g1	unitig_699	147569	147884	317	1	1
TRINITY_DN31315_c0_g1	unitig_0	7253299	7253952	654	1	1
TRINITY_DN31382_c0_g1	unitig_21	2615791	2616322	532	1	1
TRINITY_DN31446_c0_g1	unitig_699	1591210	1591560	351	1	1
TRINITY_DN31544_c0_g1	unitig_37	730645	730887	243	1	1
TRINITY_DN31885_c0_g1	unitig_88	88827	89071	245	1	1
TRINITY_DN32132_c0_g1	unitig_0	7874000	7874283	284	1	1
TRINITY_DN3226_c0_g2	unitig_8	5126775	5127603	644	-1	2
TRINITY_DN32494_c0_g1	unitig_37	2607369	2607612	244	1	1
TRINITY_DN4071_c0_g2	unitig_0	241004	241928	528	1	2
TRINITY_DN4786_c1_g1	unitig_0	555874	556096	223	1	1
TRINITY_DN5546_c0_g2	unitig_899	3136445	3137783	325	1	3
TRINITY_DN11413_c1_g1	unitig_8	4427505	4428183	505	-1	3
TRINITY_DN11738_c0_g2	unitig_748	2302482	2302781	300	1	1
TRINITY_DN12058_c0_g3	unitig_37	1066106	1066633	408	-1	2
TRINITY_DN12520_c0_g1	unitig_37	2034379	2034587	209	1	1
TRINITY_DN12734_c0_g1	unitig_26	696146	696537	392	1	1
TRINITY_DN1320_c0_g1	unitig_46	2560162	2560402	241	1	1
TRINITY_DN13510_c0_g1	unitig_46	3020212	3020817	606	1	1
TRINITY_DN13698_c0_g1	unitig_736	1086310	1086667	358	1	1
TRINITY_DN13728_c0_g1	unitig_26	1802565	1803038	393	1	2
TRINITY_DN14209_c0_g1	unitig_736	462089	462384	296	1	1
TRINITY_DN14341_c0_g1	unitig_699	2252575	2252797	228	1	1
TRINITY_DN1467_c0_g2	unitig_26	2738006	2738557	557	1	1
TRINITY_DN14740_c0_g1	unitig_699	3174405	3174836	432	1	1
TRINITY_DN14810_c0_g1	unitig_746	530769	531052	284	1	1
TRINITY_DN15262_c0_g1	unitig_32	3815577	3815858	282	1	1
TRINITY_DN15739_c0_g1	unitig_22	5291817	5292372	299	1	3
TRINITY_DN15783_c0_g1	unitig_90	444485	444796	312	1	1
TRINITY_DN15798_c0_g1	unitig_26	3939430	3939667	238	1	1
TRINITY_DN15909_c0_g1	unitig_578	2502613	2502864	252	1	1
TRINITY_DN16130_c0_g1	unitig_62	1743901	1744453	553	1	1
TRINITY_DN1613_c0_g1	unitig_0	2734025	2734400	378	1	1
TRINITY_DN16259_c0_g1	unitig_749	2643535	2643863	329	1	1
TRINITY_DN16399_c0_g1	unitig_27	2015851	2016395	433	-1	2
TRINITY_DN16475_c0_g1	unitig_27	895202	895711	434	1	2
TRINITY_DN16697_c0_g1	unitig_37	2706288	2706606	216	1	2
TRINITY_DN16705_c0_g1	unitig_22	4312113	4312633	521	1	1
TRINITY_DN17197_c0_g1	unitig_899	1873904	1874151	248	1	1
TRINITY_DN17387_c0_g1	unitig_61	1479362	1479586	273	1	1
TRINITY_DN17415_c0_g1	unitig_749	2964783	2965072	290	1	1
TRINITY_DN17529_c0_g1	unitig_37	1550059	1550537	305	1	2
TRINITY_DN17546_c0_g1	unitig_736	911626	911897	272	1	1
TRINITY_DN18072_c0_g1	unitig_61	954840	955049	210	1	1
TRINITY_DN18149_c0_g1	unitig_22	5262982	5263438	457	1	1
TRINITY_DN18284_c0_g1	unitig_0	8254142	8254352	211	1	1
TRINITY_DN18513_c0_g1	unitig_27	563532	564453	784	1	3
TRINITY_DN18655_c0_g1	unitig_85	414269	414520	253	1	1
TRINITY_DN19395_c0_g1	unitig_899	3128230	3128536	307	1	1
TRINITY_DN19930_c0_g1	unitig_85	38346	38661	316	1	1
TRINITY_DN20015_c0_g1	unitig_37	2480410	2480648	239	1	1
TRINITY_DN20268_c0_g1	unitig_32	671173	671438	266	1	1
TRINITY_DN20285_c0_g1	unitig_748	1327248	1327578	331	1	1
TRINITY_DN2033_c1_g1	unitig_747	2050584	2051326	743	1	1
TRINITY_DN21320_c0_g1	unitig_750	186476	186729	254	1	1
TRINITY_DN21630_c0_g1	unitig_699	1911963	1912199	237	1	1
TRINITY_DN22432_c0_g1	unitig_0	4828805	4829156	352	1	1
TRINITY_DN23034_c0_g1	unitig_62	1790165	1790751	587	1	1
TRINITY_DN23287_c0_g1	unitig_899	2422526	2422785	260	1	1
TRINITY_DN23369_c0_g1	unitig_27	84074	84398	325	1	1
TRINITY_DN24784_c0_g1	unitig_0	87510	87838	331	1	1
TRINITY_DN24931_c0_g1	unitig_37	2055241	2055630	390	1	1
TRINITY_DN25138_c0_g1	unitig_0	1364199	1364476	278	1	1
TRINITY_DN25194_c0_g1	unitig_748	162240	162552	313	1	1
TRINITY_DN25463_c0_g1	unitig_37	2595982	2596764	537	1	2
TRINITY_DN25798_c0_g1	unitig_27	846708	847015	308	1	1
TRINITY_DN26441_c0_g1	unitig_578	2397138	2397376	239	1	1
TRINITY_DN26518_c0_g1	unitig_699	1304784	1305063	280	1	1
TRINITY_DN26695_c0_g1	unitig_26	3731004	3731553	551	1	1
TRINITY_DN26708_c0_g1	unitig_22	329549	329794	246	1	1
TRINITY_DN27611_c0_g1	unitig_744	1990577	1990814	238	1	1
TRINITY_DN27766_c0_g1	unitig_22	11491	11940	456	1	1
TRINITY_DN28341_c0_g1	unitig_52	253278	253579	302	1	1
TRINITY_DN28789_c0_g1	unitig_747	2181884	2182153	270	1	1
TRINITY_DN29616_c0_g1	unitig_61	638811	639145	336	1	1
TRINITY_DN29725_c0_g1	unitig_0	4156340	4156904	302	-1	2
TRINITY_DN29959_c0_g1	unitig_748	305079	305626	426	-1	2
TRINITY_DN30004_c0_g1	unitig_0	8352522	8352806	285	1	1
TRINITY_DN30090_c0_g1	unitig_578	2754320	2754884	565	1	1
TRINITY_DN30217_c0_g1	unitig_26	3843392	3844607	583	-1	4
TRINITY_DN30324_c0_g1	unitig_62	2635360	2635839	480	1	1
TRINITY_DN30850_c0_g1	unitig_52	2638662	2639148	307	1	3
TRINITY_DN30950_c0_g1	unitig_0	1620925	1621613	689	1	1
TRINITY_DN31350_c0_g1	unitig_0	8344400	8344775	376	1	1
TRINITY_DN31449_c0_g1	unitig_748	862099	863108	373	1	2
TRINITY_DN31764_c0_g1	unitig_52	1925380	1925698	319	1	1
TRINITY_DN32153_c0_g1	unitig_46	3159831	3160085	269	-1	1
TRINITY_DN32191_c0_g1	unitig_748	223250	223574	325	1	1
TRINITY_DN32359_c0_g1	unitig_26	1181067	1181414	348	1	1
TRINITY_DN32477_c0_g1	unitig_21	807435	807723	289	1	1
TRINITY_DN3485_c0_g1	unitig_46	1956085	1956301	217	1	1
TRINITY_DN3576_c0_g1	unitig_26	3231120	3231364	245	1	1
TRINITY_DN4074_c0_g1	unitig_37	1834807	1835227	421	1	1
TRINITY_DN48_c0_g1	unitig_750	55132	55614	483	1	1
TRINITY_DN11436_c0_g4	unitig_21	660623	660977	355	1	1
TRINITY_DN12189_c0_g1	unitig_26	4590657	4590958	342	1	1
TRINITY_DN12544_c0_g1	unitig_26	3779679	3779929	251	1	1
TRINITY_DN12666_c0_g1	unitig_46	2991526	2991877	352	1	1
TRINITY_DN13022_c0_g1	unitig_736	1023292	1024084	315	-1	2
TRINITY_DN13968_c0_g1	unitig_899	2587270	2587470	201	1	1
TRINITY_DN13969_c0_g1	unitig_32	1261416	1261680	266	1	1
TRINITY_DN14870_c0_g1	unitig_699	2640756	2641851	249	-1	2
TRINITY_DN14920_c0_g1	unitig_899	3380053	3380378	326	1	1
TRINITY_DN15007_c0_g2	unitig_0	2061058	2061309	252	1	1
TRINITY_DN15020_c0_g1	unitig_61	620113	620522	410	1	1
TRINITY_DN15915_c0_g1	unitig_0	2874979	2875260	282	1	1
TRINITY_DN1600_c0_g1	unitig_0	2146733	2147478	746	1	1
TRINITY_DN16097_c0_g1	unitig_748	1407605	1407939	335	1	1
TRINITY_DN16786_c0_g1	unitig_21	2551840	2552097	258	1	1
TRINITY_DN17140_c0_g1	unitig_21	1756179	1756546	368	1	1
TRINITY_DN17383_c0_g1	unitig_578	3473455	3473774	320	1	1
TRINITY_DN17471_c0_g1	unitig_750	128891	129147	257	1	1
TRINITY_DN17516_c0_g1	unitig_37	1399623	1399955	248	-1	2
TRINITY_DN17691_c0_g1	unitig_88	535476	535739	264	1	1
TRINITY_DN1793_c0_g1	unitig_578	2092438	2092780	343	1	1
TRINITY_DN18480_c0_g1	unitig_22	6074780	6075241	462	1	1
TRINITY_DN18715_c0_g1	unitig_899	2415485	2415854	370	1	1
TRINITY_DN18856_c0_g1	unitig_578	1073077	1073585	509	1	1
TRINITY_DN20327_c0_g1	unitig_747	1033856	1034337	482	1	1
TRINITY_DN20647_c0_g1	unitig_60	851420	851749	330	1	1
TRINITY_DN20789_c0_g1	unitig_32	2835929	2836239	311	1	1
TRINITY_DN20808_c0_g1	unitig_92	336176	336490	324	1	1
TRINITY_DN20890_c0_g1	unitig_62	1388387	1388656	271	1	1
TRINITY_DN21009_c0_g1	unitig_0	3884431	3884783	353	1	1
TRINITY_DN21242_c0_g1	unitig_747	2238997	2239200	204	1	1
TRINITY_DN21445_c0_g1	unitig_0	7485376	7485605	230	1	1
TRINITY_DN21555_c0_g1	unitig_85	285998	286257	261	1	1
TRINITY_DN21598_c0_g1	unitig_62	2050698	2050959	262	1	1
TRINITY_DN22622_c0_g1	unitig_899	2444300	2444616	317	1	1
TRINITY_DN23189_c0_g1	unitig_32	3546516	3546857	342	1	1
TRINITY_DN23190_c0_g1	unitig_0	7139974	7140358	293	1	2
TRINITY_DN23244_c0_g1	unitig_32	126935	127232	298	1	1
TRINITY_DN23667_c0_g1	unitig_8	40471	41039	363	-1	2
TRINITY_DN23752_c0_g1	unitig_0	2223387	2223842	456	1	1
TRINITY_DN23756_c0_g1	unitig_21	2471536	2472153	618	1	1
TRINITY_DN24120_c0_g1	unitig_52	2990660	2990956	297	1	1
TRINITY_DN25111_c0_g1	unitig_52	2550054	2550550	304	-1	2
TRINITY_DN25385_c0_g1	unitig_0	6650049	6650268	220	1	1
TRINITY_DN25438_c0_g1	unitig_578	1549903	1550616	714	1	1
TRINITY_DN25732_c0_g1	unitig_61	648543	649040	498	1	1
TRINITY_DN26109_c0_g1	unitig_899	3424030	3424672	643	1	1
TRINITY_DN26267_c0_g1	unitig_37	261412	261687	276	1	1
TRINITY_DN26278_c0_g1	unitig_26	1393532	1393916	385	1	1
TRINITY_DN26717_c0_g1	unitig_92	293564	293782	219	1	1
TRINITY_DN26752_c0_g1	unitig_748	2505044	2505626	583	1	1
TRINITY_DN27032_c0_g1	unitig_744	1776591	1776883	293	1	1
TRINITY_DN27148_c0_g1	unitig_26	4086796	4087542	747	1	1
TRINITY_DN27380_c0_g1	unitig_92	208027	208398	372	1	1
TRINITY_DN27608_c0_g1	unitig_22	1191242	1191712	471	1	1
TRINITY_DN27758_c0_g1	unitig_0	7811326	7811679	354	1	1
TRINITY_DN27830_c0_g1	unitig_0	1831446	1831767	322	1	1
TRINITY_DN27974_c0_g1	unitig_27	700489	700700	213	1	1
TRINITY_DN28081_c0_g1	unitig_26	190716	190989	274	1	1
TRINITY_DN28182_c0_g1	unitig_749	2969090	2969347	258	1	1
TRINITY_DN28382_c0_g1	unitig_22	5838789	5839015	227	1	1
TRINITY_DN28583_c0_g1	unitig_747	447874	448275	402	1	1
TRINITY_DN29272_c0_g1	unitig_46	438960	439205	269	1	1
TRINITY_DN29645_c0_g1	unitig_32	228668	229060	393	1	1
TRINITY_DN29848_c0_g1	unitig_899	2793726	2794611	420	1	2
TRINITY_DN30038_c0_g1	unitig_32	3819774	3820112	339	1	1
TRINITY_DN30223_c0_g1	unitig_37	2529736	2529976	241	1	1
TRINITY_DN30258_c0_g1	unitig_0	7441697	7441964	268	1	1
TRINITY_DN30530_c1_g1	unitig_21	38334	38621	288	1	1
TRINITY_DN30782_c0_g1	unitig_61	533748	534156	409	1	1
TRINITY_DN31015_c0_g1	unitig_747	1341747	1342127	381	1	1
TRINITY_DN31273_c0_g1	unitig_0	418465	418678	215	1	1
TRINITY_DN31330_c0_g1	unitig_22	2367162	2367726	565	1	1
TRINITY_DN31462_c0_g1	unitig_0	7247945	7248184	240	1	1
TRINITY_DN32032_c0_g1	unitig_37	903271	903483	213	1	1
TRINITY_DN32091_c0_g1	unitig_749	2372057	2372474	418	1	1
TRINITY_DN32170_c0_g1	unitig_27	769337	769576	240	1	1
TRINITY_DN32229_c0_g1	unitig_0	3771959	3772219	261	1	1
TRINITY_DN32336_c0_g1	unitig_750	91892	92127	237	1	1
TRINITY_DN3704_c0_g1	unitig_21	388306	389604	1299	1	1
TRINITY_DN3936_c0_g1	unitig_26	1918595	1919215	533	-1	2
TRINITY_DN4931_c1_g1	unitig_749	2297662	2297930	274	1	1
TRINITY_DN108_c0_g1	unitig_899	1710334	1711037	598	-1	2
TRINITY_DN11334_c1_g1	unitig_52	2204518	2204799	282	1	1
TRINITY_DN12410_c0_g1	unitig_578	3208510	3208739	230	1	1
TRINITY_DN12516_c0_g1	unitig_0	5692655	5692973	319	1	1
TRINITY_DN12619_c0_g1	unitig_899	2542071	2542454	384	1	1
TRINITY_DN13077_c0_g1	unitig_748	3204084	3204400	317	1	1
TRINITY_DN13125_c0_g1	unitig_0	2566432	2566747	316	1	1
TRINITY_DN13402_c0_g1	unitig_750	23447	23828	382	1	1
TRINITY_DN13899_c0_g1	unitig_747	537310	537615	306	1	1
TRINITY_DN14155_c0_g1	unitig_744	557798	558060	263	1	1
TRINITY_DN15878_c0_g1	unitig_747	68112	68919	482	-1	2
TRINITY_DN15992_c0_g1	unitig_22	305612	305967	356	1	1
TRINITY_DN16447_c0_g1	unitig_748	5248278	5248613	336	1	1
TRINITY_DN16633_c0_g1	unitig_748	4160929	4161263	349	1	1
TRINITY_DN16842_c0_g1	unitig_0	2565530	2565730	201	1	1
TRINITY_DN16940_c0_g1	unitig_26	2851480	2852044	565	1	1
TRINITY_DN17330_c0_g1	unitig_749	2657934	2658269	336	1	1
TRINITY_DN17417_c0_g1	unitig_32	614136	614394	259	1	1
TRINITY_DN17574_c0_g1	unitig_46	558890	559182	293	1	1
TRINITY_DN17967_c0_g1	unitig_32	314675	315308	634	1	1
TRINITY_DN18097_c0_g1	unitig_749	1004211	1004594	393	1	1
TRINITY_DN18427_c0_g1	unitig_62	653002	654020	419	-1	2
TRINITY_DN18459_c0_g1	unitig_22	5494819	5495021	203	1	1
TRINITY_DN18579_c0_g1	unitig_41	28037	28271	235	1	1
TRINITY_DN18682_c0_g1	unitig_21	228494	228805	235	-1	2
TRINITY_DN18804_c0_g1	unitig_27	1069136	1069663	528	1	1
TRINITY_DN19837_c0_g1	unitig_578	1471884	1472133	250	1	1
TRINITY_DN19873_c0_g1	unitig_748	1689479	1689887	409	1	1
TRINITY_DN20200_c0_g1	unitig_899	736637	737214	578	1	1
TRINITY_DN20684_c0_g1	unitig_578	1021247	1021485	239	1	1
TRINITY_DN20759_c0_g1	unitig_26	3624875	3625623	368	1	3
TRINITY_DN20769_c0_g1	unitig_744	425102	425323	223	1	1
TRINITY_DN20878_c0_g1	unitig_0	3185318	3185542	234	1	1
TRINITY_DN20973_c0_g1	unitig_0	3182969	3183259	291	1	1
TRINITY_DN21277_c0_g1	unitig_21	1179141	1179384	244	1	1
TRINITY_DN21524_c0_g1	unitig_62	2398402	2398690	289	1	1
TRINITY_DN21565_c0_g1	unitig_749	2320381	2320661	281	1	1
TRINITY_DN23252_c0_g1	unitig_699	2116463	2116755	294	1	1
TRINITY_DN23536_c0_g1	unitig_747	29990	30388	400	1	1
TRINITY_DN2425_c0_g1	unitig_60	68683	69107	316	1	2
TRINITY_DN25098_c0_g1	unitig_46	2991187	2991477	291	1	1
TRINITY_DN26040_c0_g1	unitig_0	3534327	3534703	377	1	1
TRINITY_DN26045_c0_g1	unitig_62	1293644	1294056	413	1	1
TRINITY_DN26307_c0_g1	unitig_37	2501337	2501717	381	1	1
TRINITY_DN2648_c0_g1	unitig_32	2928183	2928715	533	1	1
TRINITY_DN26699_c0_g1	unitig_26	4152678	4153407	730	1	1
TRINITY_DN27895_c0_g1	unitig_61	1255020	1255248	229	1	1
TRINITY_DN27976_c0_g1	unitig_52	2270707	2270962	256	1	1
TRINITY_DN28725_c0_g1	unitig_749	1046520	1046753	234	1	1
TRINITY_DN30003_c0_g1	unitig_0	8487797	8488033	237	1	1
TRINITY_DN30300_c0_g1	unitig_62	1891085	1891718	634	1	1
TRINITY_DN30304_c0_g1	unitig_46	1605478	1605776	299	1	1
TRINITY_DN30308_c0_g1	unitig_32	2801863	2802392	282	-1	2
TRINITY_DN30342_c0_g1	unitig_22	537503	538010	508	1	1
TRINITY_DN30388_c0_g1	unitig_0	740383	740688	306	1	1
TRINITY_DN30822_c0_g1	unitig_26	3880200	3880427	228	1	1
TRINITY_DN31001_c0_g1	unitig_62	2634544	2634831	289	1	1
TRINITY_DN31094_c0_g1	unitig_899	119935	120212	278	1	1
TRINITY_DN31156_c0_g1	unitig_0	1237953	1238405	273	-1	2
TRINITY_DN31292_c0_g1	unitig_22	5547311	5547792	482	1	1
TRINITY_DN31581_c0_g1	unitig_0	8140051	8140318	268	1	1
TRINITY_DN31640_c0_g1	unitig_26	3765008	3765222	215	1	1
TRINITY_DN31644_c0_g1	unitig_736	2216604	2216875	272	1	1
TRINITY_DN32187_c0_g1	unitig_22	6027521	6027757	237	1	1
TRINITY_DN3351_c0_g1	unitig_748	475022	475328	307	1	1
TRINITY_DN3509_c0_g1	unitig_899	519475	519809	336	1	1
TRINITY_DN4514_c0_g1	unitig_46	3032746	3033244	441	-1	2
TRINITY_DN4826_c0_g1	unitig_0	2237896	2238704	718	-1	2
TRINITY_DN4980_c1_g1	unitig_22	914300	914519	220	1	1
TRINITY_DN5295_c1_g1	unitig_736	2226720	2227096	292	-1	2
TRINITY_DN5876_c0_g1	unitig_746	81267	81565	223	-1	2
TRINITY_DN10077_c0_g2	unitig_578	1967803	1968737	322	1	2
TRINITY_DN10650_c0_g1	unitig_60	907858	908088	231	1	1
TRINITY_DN10915_c1_g1	unitig_748	1764541	1764778	238	1	1
TRINITY_DN11351_c0_g1	unitig_748	728552	728945	394	1	1
TRINITY_DN11964_c0_g1	unitig_62	1467436	1467702	267	1	1
TRINITY_DN12845_c0_g1	unitig_736	284331	284635	305	1	1
TRINITY_DN13233_c0_g1	unitig_0	1038260	1038493	234	1	1
TRINITY_DN13435_c0_g1	unitig_8	2053937	2054365	292	1	2
TRINITY_DN14090_c0_g1	unitig_22	2379047	2379254	214	1	1
TRINITY_DN14160_c0_g1	unitig_26	2459942	2460152	213	1	1
TRINITY_DN14472_c0_g1	unitig_899	1385023	1385372	350	1	1
TRINITY_DN14719_c0_g1	unitig_748	1010030	1010334	305	1	1
TRINITY_DN1530_c0_g1	unitig_699	741391	741664	274	1	1
TRINITY_DN15544_c0_g1	unitig_747	89930	90390	461	1	1
TRINITY_DN15565_c0_g1	unitig_0	8379993	8380469	477	1	1
TRINITY_DN15809_c0_g1	unitig_899	1365456	1366323	868	1	1
TRINITY_DN16228_c0_g1	unitig_26	2924631	2925005	375	1	1
TRINITY_DN16474_c0_g1	unitig_22	4198764	4199015	252	1	1
TRINITY_DN17347_c0_g1	unitig_0	3411092	3411416	325	1	1
TRINITY_DN17376_c0_g1	unitig_26	1874592	1874905	314	1	1
TRINITY_DN17424_c0_g1	unitig_21	1798988	1799283	296	1	1
TRINITY_DN18771_c0_g1	unitig_26	2393447	2393681	235	1	1
TRINITY_DN18906_c0_g1	unitig_749	694445	694692	248	1	1
TRINITY_DN19749_c0_g1	unitig_52	3232694	3232964	271	1	1
TRINITY_DN2041_c0_g1	unitig_22	6161461	6161690	230	1	1
TRINITY_DN20753_c0_g1	unitig_52	2627804	2628112	309	1	1
TRINITY_DN20873_c0_g1	unitig_26	2239000	2239274	275	1	1
TRINITY_DN20992_c0_g1	unitig_37	1032348	1032641	294	1	1
TRINITY_DN21031_c0_g1	unitig_0	7745484	7745725	242	1	1
TRINITY_DN21300_c0_g1	unitig_748	4337332	4337672	341	1	1
TRINITY_DN21447_c0_g1	unitig_0	6899937	6900201	265	1	1
TRINITY_DN21454_c0_g1	unitig_22	4143701	4143945	245	1	1
TRINITY_DN2251_c0_g1	unitig_744	1850088	1850410	323	1	1
TRINITY_DN22785_c0_g1	unitig_899	981754	982025	272	1	1
TRINITY_DN23493_c0_g1	unitig_736	1287626	1287915	290	1	1
TRINITY_DN23825_c0_g1	unitig_748	3957140	3957623	484	1	1
TRINITY_DN24105_c0_g1	unitig_22	4744019	4744369	351	1	1
TRINITY_DN24216_c0_g1	unitig_22	5374536	5374911	376	1	1
TRINITY_DN24400_c0_g1	unitig_26	2164023	2164309	287	1	1
TRINITY_DN24506_c0_g1	unitig_46	3095855	3096055	201	1	1
TRINITY_DN24703_c0_g1	unitig_899	2065456	2065767	231	1	2
TRINITY_DN24722_c0_g1	unitig_899	2252314	2252599	286	1	1
TRINITY_DN24961_c0_g1	unitig_578	1275211	1275416	206	1	1
TRINITY_DN24992_c0_g1	unitig_88	132168	132445	294	1	1
TRINITY_DN25029_c0_g1	unitig_699	1589062	1589355	311	-1	1
TRINITY_DN25243_c0_g1	unitig_26	2474660	2474894	235	1	1
TRINITY_DN25740_c0_g1	unitig_736	1040160	1040474	315	1	1
TRINITY_DN26068_c0_g1	unitig_749	343368	343742	376	1	1
TRINITY_DN26385_c0_g2	unitig_699	2655996	2656271	277	1	1
TRINITY_DN26415_c0_g1	unitig_21	2467754	2468124	371	1	1
TRINITY_DN26459_c0_g1	unitig_88	263950	264223	274	1	1
TRINITY_DN26756_c0_g1	unitig_699	448562	448893	332	1	1
TRINITY_DN27429_c0_g1	unitig_62	2235088	2235428	345	1	1
TRINITY_DN27443_c0_g1	unitig_32	953671	953900	233	1	1
TRINITY_DN27586_c0_g1	unitig_578	2466766	2467053	288	1	1
TRINITY_DN27642_c0_g1	unitig_899	2467899	2468416	518	1	1
TRINITY_DN278_c0_g1	unitig_0	5744793	5745210	418	1	1
TRINITY_DN28247_c0_g1	unitig_699	1768040	1768397	358	1	1
TRINITY_DN28354_c0_g1	unitig_899	2413250	2413774	525	1	1
TRINITY_DN28616_c0_g1	unitig_22	4293172	4293389	218	1	1
TRINITY_DN28707_c0_g1	unitig_0	3833492	3833784	293	1	1
TRINITY_DN28807_c0_g1	unitig_748	1237315	1237590	276	1	1
TRINITY_DN28812_c0_g1	unitig_62	1952341	1952673	242	-1	2
TRINITY_DN28836_c0_g1	unitig_52	1811059	1811263	205	1	1
TRINITY_DN29080_c0_g1	unitig_37	345506	346072	567	1	1
TRINITY_DN29687_c0_g1	unitig_21	596896	597120	225	1	1
TRINITY_DN29972_c0_g1	unitig_27	2025966	2026431	466	1	1
TRINITY_DN30105_c0_g1	unitig_26	170491	170936	446	1	1
TRINITY_DN30599_c0_g1	unitig_37	1175366	1175622	257	1	1
TRINITY_DN31160_c0_g1	unitig_0	8469139	8469393	255	1	1
TRINITY_DN31270_c0_g1	unitig_749	1134560	1135084	525	1	1
TRINITY_DN31491_c0_g1	unitig_748	2898981	2899391	411	1	1
TRINITY_DN32274_c0_g1	unitig_736	557153	557373	221	1	1
TRINITY_DN3264_c0_g2	unitig_26	1461862	1462511	650	1	1
TRINITY_DN3765_c1_g1	unitig_747	796112	796385	274	1	1
TRINITY_DN3841_c0_g1	unitig_61	1093897	1094450	554	1	1
TRINITY_DN5685_c0_g2	unitig_61	544646	544940	296	1	1
TRINITY_DN5805_c0_g1	unitig_8	2545794	2546355	464	1	2
TRINITY_DN10382_c1_g1	unitig_61	624459	624771	313	1	1
TRINITY_DN11278_c0_g1	unitig_578	2884092	2884364	273	1	1
TRINITY_DN11362_c0_g1	unitig_46	2373882	2374443	392	1	2
TRINITY_DN13119_c0_g1	unitig_46	2864510	2864897	280	-1	2
TRINITY_DN13195_c0_g1	unitig_744	990178	990524	347	1	1
TRINITY_DN13913_c0_g1	unitig_750	198348	198631	284	1	1
TRINITY_DN13991_c0_g1	unitig_26	3145616	3145914	299	1	1
TRINITY_DN14158_c0_g1	unitig_578	1787247	1787467	221	1	1
TRINITY_DN14237_c0_g1	unitig_62	1852256	1852497	242	1	1
TRINITY_DN14269_c0_g1	unitig_26	3450104	3450350	247	1	1
TRINITY_DN14857_c0_g1	unitig_8	1384729	1385161	288	-1	2
TRINITY_DN15366_c0_g1	unitig_899	2393976	2394572	597	1	1
TRINITY_DN15584_c0_g1	unitig_736	1727023	1727276	254	1	1
TRINITY_DN15606_c0_g1	unitig_736	367524	368383	860	1	1
TRINITY_DN16269_c0_g1	unitig_88	438146	438933	711	1	2
TRINITY_DN16319_c0_g1	unitig_748	4805356	4805991	636	1	1
TRINITY_DN16472_c0_g1	unitig_749	2105280	2105656	377	1	1
TRINITY_DN16847_c0_g1	unitig_32	2651060	2651481	422	1	1
TRINITY_DN17482_c0_g1	unitig_748	1410370	1411163	794	1	1
TRINITY_DN17568_c0_g1	unitig_52	344436	344858	247	1	2
TRINITY_DN18817_c0_g1	unitig_22	5405363	5405709	347	1	1
TRINITY_DN19047_c0_g1	unitig_578	1151895	1152277	383	1	1
TRINITY_DN19125_c0_g1	unitig_0	1338349	1338848	500	1	1
TRINITY_DN19161_c0_g1	unitig_744	1416292	1417187	657	1	2
TRINITY_DN19618_c0_g1	unitig_62	2160537	2161034	498	1	1
TRINITY_DN19665_c0_g1	unitig_62	1554170	1554423	256	1	1
TRINITY_DN19989_c0_g1	unitig_32	3808633	3809047	415	1	1
TRINITY_DN20198_c0_g1	unitig_0	2391808	2392049	243	1	1
TRINITY_DN20591_c0_g1	unitig_21	883438	883652	215	1	1
TRINITY_DN20637_c0_g1	unitig_578	1280232	1280747	516	1	1
TRINITY_DN20847_c0_g1	unitig_8	902235	902512	206	1	2
TRINITY_DN21074_c0_g1	unitig_60	278781	279067	287	1	1
TRINITY_DN21131_c0_g1	unitig_736	1040545	1040818	274	1	1
TRINITY_DN21134_c0_g1	unitig_749	1270807	1271103	297	1	1
TRINITY_DN21190_c0_g1	unitig_32	1349719	1349992	274	1	1
TRINITY_DN21361_c0_g1	unitig_899	563453	563767	315	1	1
TRINITY_DN22066_c0_g1	unitig_0	2051833	2052158	326	1	1
TRINITY_DN22195_c0_g1	unitig_749	3205821	3206177	365	1	1
TRINITY_DN22560_c0_g1	unitig_52	334794	335180	387	1	1
TRINITY_DN22831_c0_g1	unitig_37	1932329	1932726	398	1	1
TRINITY_DN23576_c0_g1	unitig_37	75935	76478	544	1	1
TRINITY_DN23863_c0_g1	unitig_699	1979822	1980200	379	1	1
TRINITY_DN23940_c0_g1	unitig_747	2230117	2230624	434	-1	2
TRINITY_DN24036_c0_g1	unitig_21	3101324	3101583	260	1	1
TRINITY_DN24182_c0_g1	unitig_85	74527	74749	223	1	1
TRINITY_DN24370_c0_g1	unitig_62	509082	509303	222	1	1
TRINITY_DN24436_c0_g1	unitig_22	1557955	1558237	292	1	1
TRINITY_DN24572_c0_g1	unitig_736	1023395	1023699	305	1	1
TRINITY_DN25056_c0_g1	unitig_88	305698	305978	281	1	1
TRINITY_DN25172_c0_g1	unitig_22	5563226	5563595	370	1	1
TRINITY_DN25998_c0_g1	unitig_52	2102332	2103065	734	1	1
TRINITY_DN26127_c0_g1	unitig_22	328617	328916	300	1	1
TRINITY_DN2633_c0_g2	unitig_744	968110	968543	434	1	1
TRINITY_DN26874_c0_g1	unitig_37	384599	384805	207	1	1
TRINITY_DN27165_c0_g1	unitig_88	365581	365958	287	-1	2
TRINITY_DN27291_c0_g1	unitig_32	3794870	3795263	302	1	2
TRINITY_DN27509_c0_g1	unitig_899	2663181	2663900	720	1	1
TRINITY_DN27960_c0_g1	unitig_22	5756040	5756354	315	1	1
TRINITY_DN27983_c0_g1	unitig_578	2354770	2355038	269	1	1
TRINITY_DN28051_c0_g1	unitig_0	8012282	8012485	204	1	1
TRINITY_DN28230_c0_g1	unitig_22	3902755	3902997	243	1	1
TRINITY_DN28635_c0_g1	unitig_32	252751	253198	286	1	3
TRINITY_DN29105_c0_g1	unitig_26	1831752	1832067	316	1	1
TRINITY_DN29451_c0_g1	unitig_22	993156	993430	277	1	1
TRINITY_DN29683_c0_g1	unitig_52	2765095	2765304	210	1	1
TRINITY_DN29770_c0_g1	unitig_0	7684549	7684945	397	1	1
TRINITY_DN30142_c0_g1	unitig_0	4049754	4050665	830	-1	2
TRINITY_DN30709_c0_g1	unitig_750	77711	77947	237	1	1
TRINITY_DN31225_c0_g1	unitig_747	2016377	2016712	336	1	1
TRINITY_DN31361_c0_g1	unitig_578	3240563	3240833	271	1	1
TRINITY_DN31434_c0_g1	unitig_22	2811188	2811460	273	1	1
TRINITY_DN31683_c0_g1	unitig_52	637107	637375	269	1	1
TRINITY_DN31799_c0_g1	unitig_26	3166045	3166450	406	1	1
TRINITY_DN31824_c0_g1	unitig_32	556458	556667	216	1	1
TRINITY_DN31997_c0_g1	unitig_26	1486804	1487084	281	1	1
TRINITY_DN32330_c0_g1	unitig_26	501242	501578	341	1	1
TRINITY_DN32478_c0_g1	unitig_21	1964627	1964856	230	1	1
TRINITY_DN3251_c0_g1	unitig_744	1049637	1050261	625	1	1
TRINITY_DN3291_c0_g1	unitig_46	1601972	1602545	574	1	1
TRINITY_DN4407_c0_g1	unitig_22	126848	128389	1053	-1	3
TRINITY_DN4504_c0_g1	unitig_26	2850554	2850918	235	1	2
TRINITY_DN4582_c0_g1	unitig_699	2713553	2714102	550	1	1
TRINITY_DN515_c0_g1	unitig_46	2430927	2431548	622	1	1
TRINITY_DN5434_c0_g1	unitig_748	4311282	4311800	519	1	1
TRINITY_DN582_c0_g1	unitig_27	1362790	1363114	325	1	1
TRINITY_DN11026_c1_g1	unitig_32	2779886	2780210	325	1	1
TRINITY_DN11555_c0_g2	unitig_578	2267779	2268528	750	1	1
TRINITY_DN1159_c0_g1	unitig_85	297759	298189	341	1	2
TRINITY_DN12373_c0_g1	unitig_747	2250441	2250671	231	1	1
TRINITY_DN12738_c0_g1	unitig_8	6285652	6286209	265	-1	2
TRINITY_DN12870_c0_g1	unitig_60	341723	341982	260	1	1
TRINITY_DN12920_c0_g1	unitig_21	882138	882476	339	1	1
TRINITY_DN13249_c0_g1	unitig_46	183403	183670	268	1	1
TRINITY_DN13309_c0_g1	unitig_62	1482388	1482650	263	1	1
TRINITY_DN13321_c0_g1	unitig_21	2117827	2118376	550	1	1
TRINITY_DN13449_c0_g1	unitig_699	2485810	2486025	216	1	1
TRINITY_DN13511_c0_g1	unitig_578	1879666	1880006	341	1	1
TRINITY_DN13673_c0_g1	unitig_749	3295962	3296286	325	1	1
TRINITY_DN14214_c0_g1	unitig_88	28422	28627	206	1	1
TRINITY_DN14325_c0_g1	unitig_736	144447	144666	220	1	1
TRINITY_DN14549_c0_g1	unitig_26	1039459	1039864	406	1	1
TRINITY_DN15402_c0_g1	unitig_744	1261227	1261561	337	1	1
TRINITY_DN15423_c0_g1	unitig_27	1277287	1277563	277	1	1
TRINITY_DN15450_c0_g1	unitig_899	2022996	2023322	327	1	1
TRINITY_DN15622_c0_g1	unitig_578	3433600	3433849	253	1	1
TRINITY_DN16009_c0_g1	unitig_52	2298701	2299041	341	1	1
TRINITY_DN16119_c0_g1	unitig_899	2099637	2100744	493	-1	2
TRINITY_DN16186_c0_g1	unitig_578	3335896	3336337	442	1	1
TRINITY_DN16226_c0_g1	unitig_26	3586199	3586458	270	-1	1
TRINITY_DN17640_c0_g1	unitig_749	2768248	2768456	209	1	1
TRINITY_DN17874_c0_g1	unitig_578	407526	407752	227	1	1
TRINITY_DN17880_c0_g1	unitig_62	2192972	2193199	228	1	1
TRINITY_DN18087_c0_g1	unitig_21	1306728	1307118	391	1	1
TRINITY_DN18673_c0_g1	unitig_0	542598	542876	279	1	1
TRINITY_DN1877_c0_g2	unitig_8	5793737	5794708	519	1	2
TRINITY_DN19115_c0_g1	unitig_32	280901	281326	426	1	1
TRINITY_DN19574_c0_g1	unitig_699	1521912	1522209	299	1	1
TRINITY_DN20267_c0_g1	unitig_27	791084	791379	296	1	1
TRINITY_DN2027_c0_g1	unitig_22	1386193	1386515	323	1	1
TRINITY_DN20383_c0_g1	unitig_32	2498270	2498504	235	1	1
TRINITY_DN20618_c0_g1	unitig_578	2186120	2186412	293	1	1
TRINITY_DN20728_c0_g1	unitig_22	5082373	5082895	523	1	1
TRINITY_DN21002_c0_g1	unitig_744	2235427	2236188	311	-1	2
TRINITY_DN21251_c0_g1	unitig_578	258924	259467	241	-1	2
TRINITY_DN21276_c0_g1	unitig_0	7196157	7196462	306	1	1
TRINITY_DN21470_c0_g1	unitig_744	1786882	1787140	259	1	1
TRINITY_DN21999_c0_g1	unitig_22	5260846	5261102	257	1	1
TRINITY_DN2206_c0_g1	unitig_37	3344447	3345778	517	1	2
TRINITY_DN22244_c0_g1	unitig_22	1457450	1457806	360	1	1
TRINITY_DN22655_c0_g2	unitig_52	2094013	2094451	439	1	1
TRINITY_DN22674_c0_g1	unitig_0	58652	59000	349	1	1
TRINITY_DN22728_c0_g1	unitig_899	3144166	3144422	257	1	1
TRINITY_DN22821_c0_g1	unitig_62	1206796	1207016	221	1	1
TRINITY_DN23230_c0_g1	unitig_85	323693	323896	204	1	1
TRINITY_DN23505_c0_g1	unitig_52	2973774	2974140	367	1	1
TRINITY_DN23509_c0_g1	unitig_578	3164160	3164533	374	1	1
TRINITY_DN24074_c0_g1	unitig_0	8413564	8413949	389	1	1
TRINITY_DN24301_c0_g1	unitig_578	3259950	3260272	323	1	1
TRINITY_DN24593_c0_g1	unitig_0	8014201	8014645	259	-1	2
TRINITY_DN24808_c0_g1	unitig_32	2457753	2458084	332	1	1
TRINITY_DN24878_c0_g1	unitig_52	2575373	2575697	325	1	1
TRINITY_DN24960_c0_g1	unitig_32	987882	988196	315	1	1
TRINITY_DN26150_c0_g1	unitig_22	4144081	4144347	267	1	1
TRINITY_DN26387_c0_g1	unitig_26	3163344	3163661	318	1	1
TRINITY_DN26564_c0_g1	unitig_699	1374172	1374599	428	1	1
TRINITY_DN26732_c0_g1	unitig_32	3093332	3093718	298	-1	2
TRINITY_DN27137_c0_g1	unitig_21	1307283	1307537	255	1	1
TRINITY_DN27197_c0_g1	unitig_21	49433	49734	303	1	1
TRINITY_DN27250_c0_g1	unitig_46	2079668	2080011	344	1	1
TRINITY_DN27301_c0_g1	unitig_26	2061602	2061916	315	1	1
TRINITY_DN27453_c0_g1	unitig_748	3121462	3121885	424	1	1
TRINITY_DN27633_c0_g1	unitig_747	942124	942561	438	1	1
TRINITY_DN27829_c0_g1	unitig_0	7227654	7228086	229	-1	2
TRINITY_DN28100_c0_g1	unitig_37	1075228	1075717	396	1	2
TRINITY_DN28348_c0_g1	unitig_578	2886591	2886832	243	1	1
TRINITY_DN28402_c0_g1	unitig_0	1887902	1888104	206	1	1
TRINITY_DN28642_c0_g1	unitig_899	2050760	2050996	249	1	1
TRINITY_DN28753_c0_g1	unitig_27	1063332	1063539	208	1	1
TRINITY_DN28959_c0_g1	unitig_22	6075250	6075812	563	1	1
TRINITY_DN29504_c0_g1	unitig_0	7649481	7649888	408	1	1
TRINITY_DN29579_c0_g1	unitig_61	1532727	1533174	375	1	2
TRINITY_DN30408_c0_g1	unitig_578	1456391	1456793	403	1	1
TRINITY_DN31228_c0_g1	unitig_748	984818	985956	482	-1	2
TRINITY_DN31453_c0_g1	unitig_52	3209747	3210002	256	1	1
TRINITY_DN3148_c0_g2	unitig_37	891678	892032	288	-1	2
TRINITY_DN31510_c0_g1	unitig_746	33626	33866	241	1	1
TRINITY_DN31554_c0_g1	unitig_699	2085238	2085565	328	1	1
TRINITY_DN31641_c0_g1	unitig_22	5444115	5444368	254	1	1
TRINITY_DN31784_c0_g1	unitig_21	1917346	1917729	384	1	1
TRINITY_DN31809_c0_g1	unitig_899	2530462	2531038	277	1	2
TRINITY_DN31881_c0_g1	unitig_85	378264	378598	335	1	1
TRINITY_DN32454_c0_g1	unitig_22	430250	430555	306	1	1
TRINITY_DN434_c0_g1	unitig_22	4154768	4155051	296	1	1
TRINITY_DN4367_c1_g1	unitig_748	1742396	1742798	403	1	1
TRINITY_DN4574_c0_g3	unitig_26	3934007	3934355	349	1	1
TRINITY_DN5217_c0_g2	unitig_899	593585	593996	413	1	1
TRINITY_DN5328_c0_g1	unitig_26	3913927	3915052	499	-1	3
TRINITY_DN10736_c1_g1	unitig_62	1262944	1263153	211	1	1
TRINITY_DN11208_c0_g3	unitig_744	1166273	1166603	331	1	1
TRINITY_DN11730_c0_g2	unitig_899	775529	776010	406	-1	2
TRINITY_DN12679_c0_g1	unitig_744	1628044	1628362	319	1	1
TRINITY_DN13330_c0_g1	unitig_62	890925	891276	352	1	1
TRINITY_DN13368_c0_g1	unitig_747	250026	250452	429	1	1
TRINITY_DN14108_c0_g1	unitig_0	2631298	2631568	271	1	1
TRINITY_DN14536_c0_g1	unitig_62	495309	495579	271	1	1
TRINITY_DN14978_c0_g1	unitig_899	2414917	2415172	256	1	1
TRINITY_DN14979_c0_g1	unitig_750	95204	96030	287	1	2
TRINITY_DN15114_c0_g1	unitig_0	7565206	7565773	568	1	1
TRINITY_DN15781_c0_g1	unitig_92	321334	321575	246	1	1
TRINITY_DN16166_c0_g1	unitig_0	3101738	3102141	324	1	2
TRINITY_DN16329_c0_g1	unitig_744	1253638	1253913	276	1	1
TRINITY_DN1710_c0_g1	unitig_899	3333821	3334308	372	-1	2
TRINITY_DN17410_c0_g1	unitig_0	3824475	3824812	265	1	2
TRINITY_DN17559_c0_g1	unitig_748	582213	582425	213	1	1
TRINITY_DN17615_c0_g1	unitig_0	2846280	2846552	273	1	1
TRINITY_DN17700_c0_g1	unitig_46	2664464	2664717	254	1	1
TRINITY_DN17707_c0_g1	unitig_578	1836523	1836812	290	1	1
TRINITY_DN18948_c0_g1	unitig_46	2514633	2514977	345	1	1
TRINITY_DN19123_c0_g1	unitig_26	1612938	1613325	388	1	1
TRINITY_DN19298_c0_g1	unitig_744	2227328	2227552	225	1	1
TRINITY_DN19399_c0_g1	unitig_0	8382496	8382746	251	1	1
TRINITY_DN19935_c0_g1	unitig_0	7829069	7829623	377	1	2
TRINITY_DN20019_c0_g1	unitig_85	32987	33337	351	1	1
TRINITY_DN20488_c0_g1	unitig_744	2117102	2117309	208	1	1
TRINITY_DN20538_c0_g1	unitig_578	2353839	2354146	308	1	1
TRINITY_DN20693_c0_g1	unitig_747	225531	225929	399	1	1
TRINITY_DN21339_c0_g1	unitig_748	1196033	1196353	321	1	1
TRINITY_DN21563_c0_g1	unitig_747	1200980	1201260	281	1	1
TRINITY_DN21915_c0_g1	unitig_85	649726	650983	209	1	2
TRINITY_DN22619_c0_g1	unitig_0	1729907	1730338	432	1	1
TRINITY_DN22733_c0_g1	unitig_746	528543	529011	470	1	1
TRINITY_DN22934_c0_g1	unitig_26	2862565	2863059	495	1	1
TRINITY_DN23267_c0_g1	unitig_37	1796309	1797061	527	1	3
TRINITY_DN23355_c0_g1	unitig_749	94428	94714	287	1	1
TRINITY_DN2338_c0_g2	unitig_46	1962014	1963410	1048	-1	2
TRINITY_DN23413_c0_g1	unitig_578	1092413	1092694	282	1	1
TRINITY_DN23512_c0_g1	unitig_0	535842	536212	371	1	1
TRINITY_DN23542_c0_g1	unitig_746	86030	86431	402	1	1
TRINITY_DN23603_c0_g1	unitig_22	4374403	4374726	324	1	1
TRINITY_DN23799_c0_g1	unitig_747	1373694	1374235	542	1	1
TRINITY_DN23856_c0_g1	unitig_52	1946633	1947127	321	-1	2
TRINITY_DN24247_c0_g1	unitig_899	415872	416179	308	1	1
TRINITY_DN24543_c0_g1	unitig_37	1575813	1576097	285	1	1
TRINITY_DN24734_c0_g1	unitig_749	880422	880696	275	1	1
TRINITY_DN24740_c0_g1	unitig_747	2396948	2397255	308	1	1
TRINITY_DN24765_c0_g1	unitig_60	973227	973465	239	1	1
TRINITY_DN24796_c0_g1	unitig_8	840430	840909	309	1	3
TRINITY_DN24798_c0_g1	unitig_32	3559604	3559973	370	1	1
TRINITY_DN25113_c0_g1	unitig_0	7126080	7126337	258	1	1
TRINITY_DN25158_c0_g1	unitig_88	233705	234007	303	1	1
TRINITY_DN25894_c0_g1	unitig_21	1267852	1268256	405	1	1
TRINITY_DN26534_c0_g1	unitig_749	2286031	2286342	312	1	1
TRINITY_DN26555_c0_g1	unitig_746	283252	284526	1275	1	1
TRINITY_DN26751_c0_g1	unitig_26	666510	666748	239	1	1
TRINITY_DN26848_c0_g1	unitig_0	5713485	5713741	257	1	1
TRINITY_DN26984_c0_g1	unitig_26	2521072	2521325	254	1	1
TRINITY_DN27071_c0_g1	unitig_0	2363165	2363476	312	1	1
TRINITY_DN27434_c0_g1	unitig_578	2025208	2025480	273	1	1
TRINITY_DN27490_c0_g1	unitig_52	3135065	3135415	351	1	1
TRINITY_DN27733_c0_g1	unitig_749	801183	801492	210	1	2
TRINITY_DN28095_c0_g1	unitig_22	4182634	4183039	406	1	1
TRINITY_DN28396_c0_g1	unitig_37	2605419	2605644	226	1	1
TRINITY_DN28421_c0_g1	unitig_37	2703430	2703762	333	1	1
TRINITY_DN28493_c0_g1	unitig_61	970228	970516	289	1	1
TRINITY_DN28771_c0_g1	unitig_699	2463014	2463268	255	1	1
TRINITY_DN29237_c0_g1	unitig_88	91225	92094	544	-1	2
TRINITY_DN29243_c0_g1	unitig_8	91381	91755	295	-1	2
TRINITY_DN29954_c0_g1	unitig_0	2253461	2254082	623	1	1
TRINITY_DN30039_c0_g1	unitig_26	5065858	5066187	333	1	1
TRINITY_DN30125_c0_g1	unitig_27	845220	845520	301	1	1
TRINITY_DN30404_c0_g1	unitig_899	329713	330000	291	1	1
TRINITY_DN30983_c0_g1	unitig_746	765597	765843	249	1	1
TRINITY_DN31135_c0_g1	unitig_37	2167353	2168369	418	-1	2
TRINITY_DN31196_c0_g1	unitig_0	1750403	1750642	240	1	1
TRINITY_DN31436_c0_g1	unitig_736	708045	708303	259	1	1
TRINITY_DN31475_c0_g1	unitig_22	3352823	3353341	519	1	1
TRINITY_DN31575_c0_g1	unitig_26	4230165	4230381	217	1	1
TRINITY_DN31678_c0_g1	unitig_21	895048	895354	308	1	1
TRINITY_DN31706_c0_g1	unitig_21	3099339	3099686	348	1	1
TRINITY_DN31721_c0_g1	unitig_0	2319161	2319534	374	1	1
TRINITY_DN32207_c0_g1	unitig_747	1180585	1180825	241	1	1
TRINITY_DN32216_c0_g1	unitig_26	2211349	2211588	246	1	1
TRINITY_DN32261_c0_g1	unitig_32	1446843	1447069	227	1	1
TRINITY_DN3678_c0_g1	unitig_0	7345573	7346962	1154	-1	4
TRINITY_DN3868_c0_g1	unitig_747	666011	666263	253	1	1
TRINITY_DN10257_c0_g1	unitig_747	457373	457605	233	1	1
TRINITY_DN11461_c1_g1	unitig_37	173459	173660	202	1	1
TRINITY_DN11778_c1_g1	unitig_32	303056	303532	477	1	1
TRINITY_DN12261_c0_g1	unitig_899	2998770	2999439	588	1	2
TRINITY_DN12774_c0_g1	unitig_578	3536635	3536885	251	1	1
TRINITY_DN12986_c0_g1	unitig_37	1289497	1289733	237	1	1
TRINITY_DN13082_c0_g1	unitig_32	3101816	3102078	263	1	1
TRINITY_DN13084_c0_g1	unitig_744	1860520	1860807	288	1	1
TRINITY_DN13582_c0_g1	unitig_60	953168	953592	425	1	1
TRINITY_DN13610_c0_g1	unitig_899	3415023	3415593	571	1	1
TRINITY_DN13933_c0_g1	unitig_37	3264797	3265101	305	1	1
TRINITY_DN14054_c0_g1	unitig_37	555417	555728	312	1	1
TRINITY_DN14395_c0_g1	unitig_0	1262154	1263252	1099	1	1
TRINITY_DN14607_c0_g1	unitig_748	1022498	1022816	319	1	1
TRINITY_DN1463_c0_g1	unitig_62	2392533	2392859	327	1	1
TRINITY_DN1513_c0_g2	unitig_52	1686481	1687218	251	1	2
TRINITY_DN15243_c0_g1	unitig_52	2370459	2370677	219	1	1
TRINITY_DN15851_c0_g1	unitig_21	1533388	1533763	376	1	1
TRINITY_DN161_c0_g1	unitig_60	893384	893727	344	1	1
TRINITY_DN16392_c0_g1	unitig_0	168524	168792	269	1	1
TRINITY_DN16473_c0_g1	unitig_0	6751076	6751457	305	1	2
TRINITY_DN16802_c0_g1	unitig_736	820986	821494	509	1	1
TRINITY_DN16848_c0_g1	unitig_899	1812427	1812741	315	1	1
TRINITY_DN16849_c0_g1	unitig_62	1176882	1177082	201	1	1
TRINITY_DN16999_c0_g1	unitig_22	4140690	4140972	283	1	1
TRINITY_DN17025_c0_g1	unitig_699	2098307	2098565	259	1	1
TRINITY_DN17184_c0_g1	unitig_699	2126116	2126440	325	1	1
TRINITY_DN17190_c0_g1	unitig_32	779822	780326	505	1	1
TRINITY_DN17837_c0_g1	unitig_62	1079983	1080193	214	1	1
TRINITY_DN17840_c0_g1	unitig_52	2959310	2959524	215	1	1
TRINITY_DN18224_c0_g1	unitig_748	555251	555599	349	1	1
TRINITY_DN183_c1_g1	unitig_747	1135576	1135964	389	1	1
TRINITY_DN1856_c0_g1	unitig_37	699118	699511	242	1	2
TRINITY_DN18618_c0_g1	unitig_22	229147	229525	379	1	1
TRINITY_DN18851_c0_g1	unitig_736	1149489	1149850	362	1	1
TRINITY_DN19438_c0_g1	unitig_52	1896778	1897101	324	1	1
TRINITY_DN19713_c0_g1	unitig_0	7781037	7781244	208	1	1
TRINITY_DN1971_c1_g1	unitig_32	1359595	1359942	264	-1	2
TRINITY_DN19763_c0_g1	unitig_748	1791664	1792291	628	1	1
TRINITY_DN20146_c0_g1	unitig_27	1889087	1889295	209	1	1
TRINITY_DN20147_c0_g1	unitig_32	3405442	3405899	458	1	1
TRINITY_DN20570_c0_g1	unitig_88	277888	278118	231	1	1
TRINITY_DN20588_c0_g1	unitig_32	3810524	3810837	314	1	1
TRINITY_DN20595_c0_g1	unitig_8	6674984	6675348	272	1	2
TRINITY_DN20679_c0_g1	unitig_899	2817255	2817472	218	1	1
TRINITY_DN20741_c0_g1	unitig_61	1533157	1533599	443	1	1
TRINITY_DN20977_c0_g1	unitig_21	1099206	1099471	266	1	1
TRINITY_DN21136_c0_g1	unitig_26	3540792	3541116	337	1	1
TRINITY_DN21179_c0_g1	unitig_578	1359531	1359743	213	1	1
TRINITY_DN21344_c0_g1	unitig_22	964842	965116	277	1	1
TRINITY_DN21519_c0_g1	unitig_26	4960576	4960857	282	1	1
TRINITY_DN21541_c0_g1	unitig_748	315315	315561	247	1	1
TRINITY_DN21758_c0_g1	unitig_748	864517	864847	331	1	1
TRINITY_DN21866_c0_g1	unitig_61	365488	365825	338	1	1
TRINITY_DN22877_c0_g1	unitig_62	2390088	2390499	412	1	1
TRINITY_DN23083_c0_g1	unitig_32	3634613	3635111	499	1	1
TRINITY_DN23479_c0_g1	unitig_21	903829	904264	436	1	1
TRINITY_DN23569_c0_g1	unitig_749	1045331	1045725	395	1	1
TRINITY_DN23784_c0_g1	unitig_899	2784093	2784395	303	1	1
TRINITY_DN23806_c0_g1	unitig_21	2583698	2584002	305	1	1
TRINITY_DN23836_c0_g1	unitig_0	8196093	8196474	289	1	2
TRINITY_DN23876_c0_g1	unitig_749	1454752	1455172	321	-1	2
TRINITY_DN25850_c0_g1	unitig_748	118187	118543	360	1	1
TRINITY_DN26116_c0_g1	unitig_52	2829168	2829408	242	1	1
TRINITY_DN26477_c0_g1	unitig_578	1815199	1815472	274	1	1
TRINITY_DN26503_c0_g1	unitig_22	1719108	1719402	295	1	1
TRINITY_DN26720_c0_g1	unitig_60	69453	69751	299	1	1
TRINITY_DN27462_c0_g1	unitig_899	2767117	2767353	239	1	1
TRINITY_DN27780_c0_g1	unitig_46	1586549	1586923	375	1	1
TRINITY_DN27828_c0_g1	unitig_37	2823471	2823768	312	1	1
TRINITY_DN27900_c0_g1	unitig_748	3381850	3382110	261	1	1
TRINITY_DN27915_c0_g1	unitig_32	3220775	3221240	222	1	2
TRINITY_DN28105_c0_g1	unitig_744	1657282	1657698	417	1	1
TRINITY_DN28367_c0_g1	unitig_744	1263681	1264364	341	-1	2
TRINITY_DN28573_c0_g1	unitig_26	2244093	2244386	294	1	1
TRINITY_DN28678_c0_g1	unitig_87	208799	209036	238	1	1
TRINITY_DN29379_c0_g1	unitig_32	1014408	1015029	622	1	1
TRINITY_DN29617_c0_g1	unitig_60	1058342	1058599	258	1	1
TRINITY_DN30202_c0_g1	unitig_26	3150882	3151140	260	1	1
TRINITY_DN31068_c0_g1	unitig_0	2097803	2098170	368	1	1
TRINITY_DN31411_c0_g1	unitig_22	196126	196382	257	1	1
TRINITY_DN31693_c0_g1	unitig_749	2138734	2139017	284	1	1
TRINITY_DN31929_c0_g1	unitig_0	8480016	8480356	341	1	1
TRINITY_DN32147_c0_g1	unitig_0	8196371	8197116	232	1	2
TRINITY_DN32_c0_g1	unitig_744	1238827	1239369	253	1	2
TRINITY_DN3301_c0_g1	unitig_26	18326	18535	210	1	1
TRINITY_DN3372_c0_g1	unitig_749	1885405	1885783	379	1	1
TRINITY_DN3561_c0_g2	unitig_60	780713	781120	322	-1	2
TRINITY_DN4173_c0_g2	unitig_899	3412916	3413217	302	1	1
TRINITY_DN4437_c0_g2	unitig_749	2385388	2385850	466	1	1
TRINITY_DN502_c0_g2	unitig_37	72963	73281	319	1	1
TRINITY_DN5506_c0_g2	unitig_748	2010476	2011344	869	1	1
TRINITY_DN1042_c0_g1	unitig_699	771719	771926	221	-1	1
TRINITY_DN11258_c0_g1	unitig_26	2950189	2950957	661	-1	2
TRINITY_DN11492_c3_g1	unitig_748	365470	365906	437	1	1
TRINITY_DN11906_c1_g1	unitig_578	2254998	2255437	440	1	1
TRINITY_DN12404_c0_g1	unitig_578	3496224	3496493	270	1	1
TRINITY_DN12590_c0_g1	unitig_52	2690060	2690666	607	1	1
TRINITY_DN12981_c0_g1	unitig_749	809413	809747	335	1	1
TRINITY_DN13053_c0_g1	unitig_744	2308262	2308702	441	1	1
TRINITY_DN13104_c0_g1	unitig_749	3150223	3150751	529	1	1
TRINITY_DN13166_c0_g1	unitig_22	2007875	2008129	255	1	1
TRINITY_DN13424_c0_g1	unitig_52	360331	360593	265	1	1
TRINITY_DN1356_c0_g1	unitig_699	2282991	2283801	278	1	3
TRINITY_DN13576_c0_g1	unitig_21	2222377	2222738	362	1	1
TRINITY_DN13784_c0_g1	unitig_0	3779138	3779439	302	1	1
TRINITY_DN14163_c0_g1	unitig_899	923290	923540	251	1	1
TRINITY_DN1429_c0_g1	unitig_748	5276263	5276473	211	1	1
TRINITY_DN14352_c0_g1	unitig_0	901075	901824	750	1	1
TRINITY_DN14831_c0_g1	unitig_26	1672608	1672820	214	1	1
TRINITY_DN1543_c0_g1	unitig_27	2030586	2030947	362	1	1
TRINITY_DN15494_c0_g1	unitig_26	2318464	2318811	348	1	1
TRINITY_DN15677_c0_g1	unitig_0	1760076	1760320	245	1	1
TRINITY_DN16100_c0_g1	unitig_46	1974577	1974790	214	1	1
TRINITY_DN16262_c0_g1	unitig_899	2297523	2297808	286	1	1
TRINITY_DN1646_c0_g1	unitig_0	6974326	6974912	588	1	1
TRINITY_DN16746_c0_g1	unitig_26	1356956	1357457	502	1	1
TRINITY_DN16865_c0_g1	unitig_21	428218	428476	259	1	1
TRINITY_DN17647_c0_g1	unitig_749	2692640	2692873	234	1	1
TRINITY_DN17684_c0_g1	unitig_22	5402112	5402341	230	1	1
TRINITY_DN17847_c0_g1	unitig_22	247752	247956	205	1	1
TRINITY_DN18061_c0_g1	unitig_748	1773040	1773339	304	1	1
TRINITY_DN18989_c0_g1	unitig_37	640073	640378	306	1	1
TRINITY_DN20215_c0_g1	unitig_27	942561	942989	429	1	1
TRINITY_DN20350_c0_g1	unitig_749	1742996	1743756	271	1	2
TRINITY_DN20492_c0_g1	unitig_699	1813349	1813553	205	1	1
TRINITY_DN20630_c0_g1	unitig_0	8485815	8486085	271	1	1
TRINITY_DN2089_c0_g2	unitig_52	1850307	1850894	588	1	1
TRINITY_DN20941_c0_g1	unitig_746	509976	510432	457	1	1
TRINITY_DN21045_c0_g1	unitig_21	3101738	3102040	306	1	1
TRINITY_DN21076_c0_g1	unitig_61	854264	854587	324	1	1
TRINITY_DN21266_c0_g1	unitig_37	1019131	1019604	370	1	2
TRINITY_DN21269_c0_g1	unitig_60	292712	292963	252	1	1
TRINITY_DN21469_c0_g1	unitig_899	2081104	2081584	248	1	2
TRINITY_DN22522_c0_g1	unitig_37	1179342	1179635	294	1	1
TRINITY_DN22536_c0_g1	unitig_749	2672364	2672805	442	1	1
TRINITY_DN22551_c0_g1	unitig_26	308428	308706	279	1	1
TRINITY_DN22574_c0_g1	unitig_899	1658447	1658920	262	-1	2
TRINITY_DN22871_c0_g1	unitig_744	1060847	1061282	319	-1	2
TRINITY_DN22969_c0_g1	unitig_899	1073738	1074490	753	1	1
TRINITY_DN23035_c0_g1	unitig_750	205650	205851	202	1	1
TRINITY_DN23039_c0_g1	unitig_32	29713	30116	404	1	1
TRINITY_DN23402_c0_g1	unitig_0	2507578	2507830	253	1	1
TRINITY_DN23734_c0_g1	unitig_899	3254768	3255167	400	1	1
TRINITY_DN23827_c0_g1	unitig_699	2790807	2791132	326	1	1
TRINITY_DN24254_c0_g1	unitig_26	2486550	2486856	307	1	1
TRINITY_DN24406_c0_g1	unitig_21	1794162	1794565	404	1	1
TRINITY_DN25050_c0_g1	unitig_60	1189924	1190175	252	1	1
TRINITY_DN25082_c0_g1	unitig_61	1506834	1507053	220	1	1
TRINITY_DN25083_c0_g1	unitig_749	1733502	1733723	225	1	1
TRINITY_DN25147_c0_g1	unitig_749	804967	805182	216	1	1
TRINITY_DN25254_c0_g1	unitig_746	91677	91931	255	1	1
TRINITY_DN25671_c0_g1	unitig_52	3123282	3123570	289	1	1
TRINITY_DN26221_c0_g1	unitig_60	1462116	1462733	618	1	1
TRINITY_DN26750_c0_g1	unitig_0	1332939	1333608	372	-1	3
TRINITY_DN26870_c0_g1	unitig_26	1956884	1957102	219	1	1
TRINITY_DN26929_c0_g1	unitig_0	7567555	7567896	342	1	1
TRINITY_DN27182_c0_g1	unitig_26	1353802	1354102	301	1	1
TRINITY_DN27410_c0_g1	unitig_747	1537813	1538076	264	1	1
TRINITY_DN27739_c0_g1	unitig_749	3281880	3282189	310	1	1
TRINITY_DN27820_c0_g1	unitig_46	852811	853304	494	1	1
TRINITY_DN27870_c0_g1	unitig_52	2450122	2450673	404	-1	2
TRINITY_DN27909_c0_g1	unitig_52	3123750	3123952	203	1	1
TRINITY_DN27950_c0_g1	unitig_748	532895	533253	270	-1	2
TRINITY_DN28033_c0_g1	unitig_0	3971739	3972571	221	1	2
TRINITY_DN28174_c0_g1	unitig_746	516214	516475	262	1	1
TRINITY_DN28317_c0_g1	unitig_744	1041604	1041938	335	1	1
TRINITY_DN28437_c0_g1	unitig_32	28743	29162	420	1	1
TRINITY_DN28492_c0_g1	unitig_37	2012757	2012995	239	1	1
TRINITY_DN28690_c0_g1	unitig_749	1572702	1572961	260	1	1
TRINITY_DN29503_c0_g1	unitig_747	1522123	1523039	917	1	1
TRINITY_DN29690_c0_g1	unitig_747	1389266	1389548	283	1	1
TRINITY_DN2996_c0_g1	unitig_26	3188697	3188937	241	1	1
TRINITY_DN30539_c0_g1	unitig_52	336286	336567	282	1	1
TRINITY_DN31117_c0_g1	unitig_60	381013	381269	257	1	1
TRINITY_DN31140_c0_g1	unitig_749	1373390	1374036	342	-1	2
TRINITY_DN3141_c1_g1	unitig_578	2725677	2725877	201	1	1
TRINITY_DN31598_c0_g1	unitig_22	4688527	4688753	227	1	1
TRINITY_DN31926_c0_g1	unitig_899	1713517	1713726	210	1	1
TRINITY_DN31963_c0_g1	unitig_52	1364724	1365005	282	1	1
TRINITY_DN32097_c0_g1	unitig_749	1242906	1243281	376	1	1
TRINITY_DN3343_c0_g1	unitig_46	2359861	2360202	342	1	1
TRINITY_DN3883_c1_g1	unitig_747	1635898	1636273	376	1	1
TRINITY_DN5865_c0_g1	unitig_744	1092997	1093465	223	-1	2
TRINITY_DN10044_c0_g1	unitig_37	1325908	1326897	754	-1	3
TRINITY_DN11556_c0_g1	unitig_93	22294	23040	433	1	2
TRINITY_DN11756_c0_g1	unitig_21	447802	448325	238	1	3
TRINITY_DN12104_c1_g1	unitig_22	36517	36810	294	1	1
TRINITY_DN13011_c0_g1	unitig_747	367917	368130	214	1	1
TRINITY_DN13036_c0_g1	unitig_736	1105688	1106365	678	1	1
TRINITY_DN13225_c0_g1	unitig_60	278396	278710	316	1	1
TRINITY_DN13267_c0_g1	unitig_22	3891310	3891671	362	1	1
TRINITY_DN13355_c0_g1	unitig_21	1899420	1899707	289	1	1
TRINITY_DN13999_c0_g1	unitig_899	1416163	1416422	260	1	1
TRINITY_DN14086_c0_g1	unitig_52	1743579	1743943	365	1	1
TRINITY_DN14686_c0_g1	unitig_746	479699	479949	251	1	1
TRINITY_DN14699_c0_g1	unitig_736	981268	981487	220	1	1
TRINITY_DN1472_c0_g1	unitig_0	760676	760965	290	1	1
TRINITY_DN14754_c0_g1	unitig_22	3208244	3208786	543	1	1
TRINITY_DN14908_c0_g1	unitig_26	2174109	2174557	364	-1	2
TRINITY_DN15711_c0_g1	unitig_26	1423051	1423334	284	1	1
TRINITY_DN15715_c0_g1	unitig_62	1277705	1278139	435	1	1
TRINITY_DN15750_c0_g1	unitig_8	2735701	2736515	652	1	2
TRINITY_DN16506_c0_g1	unitig_744	1716308	1716814	321	-1	2
TRINITY_DN16509_c0_g1	unitig_32	3122514	3123432	505	1	3
TRINITY_DN16888_c0_g1	unitig_27	1103255	1103840	586	1	1
TRINITY_DN17063_c0_g1	unitig_22	1107520	1107823	304	1	1
TRINITY_DN17305_c0_g1	unitig_60	494727	495146	420	1	1
TRINITY_DN17490_c0_g1	unitig_0	8374170	8374628	459	1	1
TRINITY_DN17538_c0_g1	unitig_736	190458	190672	216	1	1
TRINITY_DN17676_c0_g1	unitig_8	610073	610553	351	1	2
TRINITY_DN17849_c0_g1	unitig_899	1778784	1779059	276	1	1
TRINITY_DN18022_c0_g1	unitig_46	2228532	2229347	816	1	1
TRINITY_DN1803_c0_g1	unitig_0	82751	83062	312	1	1
TRINITY_DN18062_c0_g1	unitig_699	2071622	2071904	283	1	1
TRINITY_DN1811_c0_g1	unitig_37	3073432	3074117	315	-1	2
TRINITY_DN18535_c0_g1	unitig_0	1777080	1777398	319	1	1
TRINITY_DN19181_c0_g1	unitig_32	371288	371514	227	1	1
TRINITY_DN19212_c0_g1	unitig_46	2991864	2992224	361	1	1
TRINITY_DN19289_c0_g1	unitig_32	446403	446644	242	1	1
TRINITY_DN19479_c0_g1	unitig_749	2351049	2351640	592	1	1
TRINITY_DN20104_c0_g1	unitig_85	257197	257555	359	1	1
TRINITY_DN20368_c0_g1	unitig_62	1497751	1498177	427	1	1
TRINITY_DN20395_c0_g1	unitig_22	890772	891070	299	1	1
TRINITY_DN20476_c0_g1	unitig_0	2532590	2533030	441	1	1
TRINITY_DN20649_c0_g1	unitig_748	479945	480206	262	1	1
TRINITY_DN20793_c0_g1	unitig_46	3048698	3048996	299	1	1
TRINITY_DN20948_c0_g1	unitig_0	2703267	2703477	211	1	1
TRINITY_DN20982_c0_g1	unitig_37	1198411	1198717	307	1	1
TRINITY_DN21135_c0_g1	unitig_46	1421319	1421542	224	1	1
TRINITY_DN21400_c0_g1	unitig_21	34838	35065	228	1	1
TRINITY_DN21411_c0_g1	unitig_22	6054765	6055057	293	1	1
TRINITY_DN21537_c0_g1	unitig_899	413258	413496	239	1	1
TRINITY_DN2207_c1_g1	unitig_52	2363235	2363527	293	1	1
TRINITY_DN22168_c0_g1	unitig_62	1672280	1672713	434	1	1
TRINITY_DN22508_c0_g1	unitig_22	5586811	5587100	290	1	1
TRINITY_DN22693_c0_g1	unitig_0	1236134	1236405	274	1	1
TRINITY_DN23015_c0_g1	unitig_85	303179	303558	266	1	2
TRINITY_DN23200_c0_g1	unitig_32	3098650	3098935	286	1	1
TRINITY_DN23875_c0_g1	unitig_0	6518302	6518563	262	1	1
TRINITY_DN24045_c0_g1	unitig_699	3129904	3130325	313	1	2
TRINITY_DN24157_c0_g1	unitig_8	2790020	2790404	275	1	2
TRINITY_DN24200_c0_g1	unitig_0	3954210	3954494	285	1	1
TRINITY_DN24282_c0_g1	unitig_22	1173735	1174085	352	1	1
TRINITY_DN24319_c0_g1	unitig_26	4108144	4108502	264	-1	2
TRINITY_DN24441_c0_g1	unitig_578	2878270	2878732	463	1	1
TRINITY_DN24533_c0_g1	unitig_22	3109874	3110138	265	1	1
TRINITY_DN24562_c0_g1	unitig_578	2581643	2581889	247	1	1
TRINITY_DN24597_c0_g1	unitig_37	2082995	2083302	308	1	1
TRINITY_DN24800_c0_g1	unitig_748	5620480	5620705	226	1	1
TRINITY_DN25035_c0_g1	unitig_749	2396691	2396965	275	1	1
TRINITY_DN25091_c0_g1	unitig_26	3141128	3141334	207	1	1
TRINITY_DN26493_c0_g1	unitig_0	2349010	2349344	335	1	1
TRINITY_DN26595_c0_g1	unitig_0	3884071	3884367	297	1	1
TRINITY_DN2732_c0_g1	unitig_749	941056	941606	551	1	1
TRINITY_DN27428_c0_g1	unitig_26	3050633	3050957	325	1	1
TRINITY_DN27535_c0_g1	unitig_21	1374732	1375040	309	1	1
TRINITY_DN27714_c0_g1	unitig_8	2631823	2632405	341	-1	2
TRINITY_DN27743_c0_g1	unitig_46	2919006	2919298	293	1	1
TRINITY_DN27835_c0_g1	unitig_26	3616616	3616840	244	-1	1
TRINITY_DN28235_c0_g1	unitig_0	3649987	3650220	234	1	1
TRINITY_DN28248_c0_g1	unitig_26	747264	747631	368	1	1
TRINITY_DN28293_c0_g1	unitig_26	1782319	1782633	315	1	1
TRINITY_DN28497_c0_g1	unitig_744	1488574	1488798	225	1	1
TRINITY_DN28604_c0_g1	unitig_26	3488421	3488630	210	1	1
TRINITY_DN29407_c0_g1	unitig_578	3115365	3115575	211	1	1
TRINITY_DN29816_c0_g1	unitig_0	8205745	8206735	991	1	1
TRINITY_DN29857_c0_g1	unitig_85	169240	169663	424	1	1
TRINITY_DN30085_c0_g1	unitig_22	1265605	1266115	511	1	1
TRINITY_DN3033_c1_g1	unitig_26	951758	952077	320	1	1
TRINITY_DN3034_c0_g2	unitig_0	8099551	8099896	346	1	1
TRINITY_DN30619_c0_g1	unitig_749	2238260	2238676	335	-1	2
TRINITY_DN31020_c0_g1	unitig_0	814312	814612	301	1	1
TRINITY_DN31322_c0_g1	unitig_46	2335141	2335496	357	1	1
TRINITY_DN31489_c0_g1	unitig_744	826502	826729	228	1	1
TRINITY_DN31717_c0_g1	unitig_748	2583353	2583638	286	1	1
TRINITY_DN31755_c0_g1	unitig_22	4614850	4615075	233	1	1
TRINITY_DN31766_c0_g1	unitig_578	1626470	1626834	365	1	1
TRINITY_DN31802_c0_g1	unitig_0	1397123	1397476	354	1	1
TRINITY_DN31805_c0_g1	unitig_22	1814892	1815316	425	1	1
TRINITY_DN31927_c0_g1	unitig_26	4578821	4579117	297	1	1
TRINITY_DN31956_c0_g1	unitig_27	1229370	1229622	253	1	1
TRINITY_DN3204_c0_g1	unitig_744	125678	125929	252	1	1
TRINITY_DN32142_c0_g1	unitig_748	986912	987210	299	1	1
TRINITY_DN32469_c0_g1	unitig_744	1202163	1202472	310	1	1
TRINITY_DN3285_c0_g1	unitig_21	636661	637285	625	1	1
TRINITY_DN372_c0_g2	unitig_26	2196611	2197727	602	-1	4
TRINITY_DN4474_c0_g1	unitig_899	1353119	1353369	251	1	1
TRINITY_DN10969_c0_g1	unitig_26	1700599	1701450	852	1	1
TRINITY_DN11401_c0_g1	unitig_899	540072	541038	653	-1	2
TRINITY_DN12451_c0_g1	unitig_748	4829548	4829835	288	1	1
TRINITY_DN13186_c0_g1	unitig_750	146115	146492	379	1	1
TRINITY_DN13647_c0_g1	unitig_22	1936868	1937376	280	-1	2
TRINITY_DN13824_c0_g1	unitig_748	339817	340208	393	1	1
TRINITY_DN13896_c0_g1	unitig_21	1900847	1901105	259	1	1
TRINITY_DN14329_c0_g1	unitig_899	2825665	2825976	312	1	1
TRINITY_DN14515_c0_g1	unitig_60	1446014	1446287	274	1	1
TRINITY_DN14663_c0_g1	unitig_699	2277097	2277587	491	1	1
TRINITY_DN15196_c0_g1	unitig_88	453239	453669	431	1	1
TRINITY_DN16554_c0_g1	unitig_744	1021939	1022224	286	1	1
TRINITY_DN16615_c0_g1	unitig_22	2587723	2588027	306	1	1
TRINITY_DN16621_c0_g1	unitig_744	1659487	1659707	221	1	1
TRINITY_DN1674_c0_g1	unitig_699	2421288	2421645	358	1	1
TRINITY_DN16764_c0_g1	unitig_0	2559905	2560250	346	1	1
TRINITY_DN16777_c0_g1	unitig_744	116999	117292	294	1	1
TRINITY_DN16921_c0_g1	unitig_62	2618290	2618517	228	1	1
TRINITY_DN17309_c0_g1	unitig_0	142209	142450	242	1	1
TRINITY_DN17577_c0_g1	unitig_899	1005399	1005635	237	1	1
TRINITY_DN17607_c0_g1	unitig_748	4338307	4338602	224	-1	2
TRINITY_DN17857_c0_g1	unitig_899	1830328	1830544	217	1	1
TRINITY_DN17876_c0_g1	unitig_22	919814	920023	211	1	1
TRINITY_DN17905_c0_g1	unitig_61	1430610	1430820	211	1	1
TRINITY_DN18620_c0_g1	unitig_748	2461268	2461631	364	1	1
TRINITY_DN18929_c0_g1	unitig_744	745603	745870	268	1	1
TRINITY_DN19288_c0_g1	unitig_8	509370	509827	313	-1	2
TRINITY_DN19443_c0_g1	unitig_37	1002426	1002813	388	1	1
TRINITY_DN19639_c0_g1	unitig_61	711376	712177	802	1	1
TRINITY_DN19818_c0_g1	unitig_736	1412159	1412448	290	1	1
TRINITY_DN19881_c0_g1	unitig_21	1526721	1527156	437	1	1
TRINITY_DN19890_c0_g1	unitig_699	1385813	1386597	203	-1	2
TRINITY_DN20237_c0_g1	unitig_747	624660	624909	250	1	1
TRINITY_DN20255_c0_g1	unitig_0	394598	394803	206	1	1
TRINITY_DN20287_c0_g1	unitig_748	2182061	2182410	350	1	1
TRINITY_DN20312_c0_g1	unitig_27	2094656	2094950	295	1	1
TRINITY_DN20666_c0_g1	unitig_0	6848297	6848513	218	1	1
TRINITY_DN20784_c0_g1	unitig_26	2415140	2415455	316	1	1
TRINITY_DN21137_c0_g1	unitig_747	2534287	2534550	264	1	1
TRINITY_DN21373_c0_g1	unitig_747	1525071	1525333	263	1	1
TRINITY_DN21442_c0_g1	unitig_0	2370526	2370727	202	1	1
TRINITY_DN21479_c0_g1	unitig_8	2619523	2619978	274	-1	2
TRINITY_DN21543_c0_g1	unitig_22	3063745	3064027	283	1	1
TRINITY_DN22336_c0_g1	unitig_0	1722146	1722625	480	1	1
TRINITY_DN22436_c0_g1	unitig_748	2727649	2727990	342	1	1
TRINITY_DN22611_c0_g1	unitig_62	421171	421442	272	1	1
TRINITY_DN23084_c0_g1	unitig_899	2632208	2632635	428	1	1
TRINITY_DN23086_c0_g1	unitig_46	2883229	2883584	356	1	1
TRINITY_DN23388_c0_g1	unitig_578	3118632	3118862	231	1	1
TRINITY_DN23939_c0_g1	unitig_699	1604049	1604262	214	1	1
TRINITY_DN24133_c0_g1	unitig_747	257227	257496	270	1	1
TRINITY_DN24165_c0_g1	unitig_744	523675	524056	382	1	1
TRINITY_DN24386_c0_g1	unitig_749	666117	666458	386	-1	1
TRINITY_DN24612_c0_g1	unitig_578	846794	847186	393	1	1
TRINITY_DN24684_c0_g1	unitig_26	3961174	3961421	260	-1	1
TRINITY_DN24877_c0_g1	unitig_92	398821	399088	269	1	1
TRINITY_DN24962_c0_g1	unitig_0	2006784	2007179	396	1	1
TRINITY_DN25727_c0_g1	unitig_37	1901407	1901893	487	1	1
TRINITY_DN25782_c0_g1	unitig_27	81369	81908	540	1	1
TRINITY_DN2582_c0_g1	unitig_32	2935050	2935331	283	1	1
TRINITY_DN2612_c0_g1	unitig_32	3422609	3422876	268	1	1
TRINITY_DN26398_c0_g1	unitig_22	816377	817185	298	-1	2
TRINITY_DN26580_c0_g1	unitig_747	397037	397605	573	1	1
TRINITY_DN27055_c0_g1	unitig_61	732546	732911	369	1	1
TRINITY_DN27386_c0_g1	unitig_32	2926287	2926591	305	1	1
TRINITY_DN27448_c0_g1	unitig_26	1824501	1825031	222	1	3
TRINITY_DN27585_c0_g1	unitig_62	1766161	1766381	221	1	1
TRINITY_DN27670_c0_g1	unitig_21	2377942	2378179	238	1	1
TRINITY_DN27682_c0_g1	unitig_61	424432	424703	272	1	1
TRINITY_DN27940_c0_g1	unitig_26	5339358	5339615	258	1	1
TRINITY_DN27959_c0_g1	unitig_699	2116152	2116363	212	1	1
TRINITY_DN28213_c0_g1	unitig_746	388639	389299	468	-1	2
TRINITY_DN28234_c0_g1	unitig_37	3098969	3099195	227	1	1
TRINITY_DN28413_c0_g1	unitig_8	19776	20118	214	-1	2
TRINITY_DN28438_c0_g1	unitig_60	1175960	1176314	355	1	1
TRINITY_DN28496_c0_g1	unitig_22	1559547	1559776	230	1	1
TRINITY_DN28620_c0_g1	unitig_8	1766028	1766410	236	1	2
TRINITY_DN28622_c0_g1	unitig_22	5628068	5628287	220	1	1
TRINITY_DN28711_c0_g1	unitig_52	2337366	2337685	320	1	1
TRINITY_DN29183_c0_g1	unitig_749	1778695	1779469	775	1	1
TRINITY_DN29250_c0_g1	unitig_899	2993838	2994206	369	1	1
TRINITY_DN29277_c0_g1	unitig_26	3657160	3657890	734	1	1
TRINITY_DN29316_c0_g1	unitig_46	2449517	2450065	462	1	2
TRINITY_DN29782_c0_g1	unitig_32	3281694	3282093	400	1	1
TRINITY_DN29964_c0_g1	unitig_21	1401225	1401542	318	1	1
TRINITY_DN30073_c0_g1	unitig_746	130844	131965	470	-1	2
TRINITY_DN30307_c0_g1	unitig_46	186800	187155	356	1	1
TRINITY_DN30351_c0_g1	unitig_22	6101736	6101955	238	1	1
TRINITY_DN30515_c0_g1	unitig_749	1445768	1446066	299	1	1
TRINITY_DN30642_c0_g1	unitig_26	1573955	1574259	323	1	1
TRINITY_DN30805_c0_g1	unitig_0	344684	346187	1504	1	1
TRINITY_DN30944_c0_g1	unitig_899	694202	694788	587	1	1
TRINITY_DN31072_c0_g1	unitig_85	362164	362436	273	1	1
TRINITY_DN31212_c0_g1	unitig_578	1971077	1971554	478	1	1
TRINITY_DN31229_c0_g1	unitig_37	2569564	2570031	226	1	2
TRINITY_DN31609_c0_g1	unitig_748	1619875	1620155	292	1	1
TRINITY_DN32273_c0_g1	unitig_0	1942650	1942923	274	1	1
TRINITY_DN32373_c0_g1	unitig_27	1579654	1579895	242	1	1
TRINITY_DN32374_c0_g1	unitig_747	1136644	1136878	235	1	1
TRINITY_DN32435_c0_g1	unitig_32	1075649	1075871	223	1	1
TRINITY_DN3303_c1_g1	unitig_60	1123521	1123734	214	1	1
TRINITY_DN3589_c0_g1	unitig_61	1446860	1447101	242	1	1
TRINITY_DN4835_c0_g3	unitig_699	823184	823386	203	1	1
TRINITY_DN10295_c1_g1	unitig_736	2248212	2248571	360	1	1
TRINITY_DN10928_c0_g1	unitig_22	758429	758643	215	1	1
TRINITY_DN11654_c1_g1	unitig_85	708086	708302	217	1	1
TRINITY_DN11894_c1_g1	unitig_744	2128676	2129055	380	1	1
TRINITY_DN12137_c0_g2	unitig_26	3459464	3459894	453	1	1
TRINITY_DN12463_c0_g1	unitig_32	1673982	1674235	254	1	1
TRINITY_DN12901_c0_g1	unitig_26	1914520	1915163	327	-1	2
TRINITY_DN13023_c0_g1	unitig_21	1346559	1346897	229	-1	2
TRINITY_DN13115_c0_g1	unitig_0	3637663	3637891	229	1	1
TRINITY_DN13248_c0_g1	unitig_0	8470269	8470564	296	1	1
TRINITY_DN13262_c0_g1	unitig_94	243777	244050	274	1	1
TRINITY_DN13271_c0_g1	unitig_748	3457123	3457353	231	1	1
TRINITY_DN13451_c0_g1	unitig_749	2329652	2329927	276	1	1
TRINITY_DN14044_c0_g1	unitig_699	997088	997301	214	1	1
TRINITY_DN14188_c0_g1	unitig_62	2015849	2016102	254	1	1
TRINITY_DN14244_c0_g1	unitig_744	2014645	2015087	443	1	1
TRINITY_DN14272_c0_g1	unitig_62	1055264	1055521	258	1	1
TRINITY_DN14440_c0_g1	unitig_747	980087	980585	499	1	1
TRINITY_DN15367_c0_g1	unitig_46	2684098	2684406	309	1	1
TRINITY_DN15473_c0_g1	unitig_62	2608642	2608936	295	1	1
TRINITY_DN15644_c0_g1	unitig_748	3949555	3950005	384	-1	2
TRINITY_DN15687_c0_g1	unitig_32	3078188	3078489	304	1	1
TRINITY_DN15768_c0_g1	unitig_46	1513739	1513994	256	1	1
TRINITY_DN16021_c0_g1	unitig_0	8031599	8031811	213	1	1
TRINITY_DN16412_c0_g1	unitig_26	583609	583820	212	1	1
TRINITY_DN16476_c0_g1	unitig_8	1580857	1581291	315	-1	2
TRINITY_DN16481_c0_g1	unitig_0	1992365	1992684	320	1	1
TRINITY_DN16502_c0_g1	unitig_744	1430861	1431147	287	1	1
TRINITY_DN16616_c0_g1	unitig_744	1778700	1778916	217	1	1
TRINITY_DN16643_c0_g1	unitig_899	2414226	2414466	242	1	1
TRINITY_DN1664_c0_g2	unitig_899	2331472	2331939	470	1	1
TRINITY_DN16729_c0_g1	unitig_92	192033	192324	292	1	1
TRINITY_DN16781_c0_g1	unitig_62	2049164	2049629	466	1	1
TRINITY_DN1680_c0_g1	unitig_578	2792489	2792786	298	1	1
TRINITY_DN16935_c0_g1	unitig_26	4097217	4097475	259	1	1
TRINITY_DN17202_c0_g1	unitig_8	6471714	6472897	301	1	2
TRINITY_DN17254_c0_g1	unitig_26	2335389	2335803	415	1	1
TRINITY_DN17332_c0_g1	unitig_32	514524	515043	520	1	1
TRINITY_DN17399_c0_g1	unitig_744	2123856	2124284	435	1	1
TRINITY_DN17463_c0_g1	unitig_26	2867199	2867460	262	1	1
TRINITY_DN17530_c0_g1	unitig_26	3534050	3534390	341	1	1
TRINITY_DN17567_c0_g1	unitig_899	1760424	1760998	575	1	1
TRINITY_DN17593_c0_g1	unitig_37	587992	588568	227	1	2
TRINITY_DN17778_c0_g1	unitig_37	936120	936380	261	1	1
TRINITY_DN18220_c0_g1	unitig_27	1397897	1398562	254	1	2
TRINITY_DN18573_c0_g1	unitig_61	1519585	1520374	790	1	1
TRINITY_DN18651_c0_g1	unitig_746	128312	128621	310	1	1
TRINITY_DN18844_c0_g1	unitig_748	4589522	4589813	292	1	1
TRINITY_DN19030_c0_g1	unitig_22	4296828	4297132	305	1	1
TRINITY_DN19416_c0_g1	unitig_61	1501120	1501398	280	1	1
TRINITY_DN19795_c0_g1	unitig_62	2592528	2592798	271	1	1
TRINITY_DN19813_c0_g1	unitig_899	2416699	2416976	279	1	1
TRINITY_DN19995_c0_g1	unitig_899	1607974	1608389	416	1	1
TRINITY_DN20044_c0_g1	unitig_699	749601	750100	500	1	1
TRINITY_DN20217_c0_g1	unitig_62	2425889	2426270	382	1	1
TRINITY_DN20371_c0_g1	unitig_744	1018213	1018515	303	1	1
TRINITY_DN20425_c0_g1	unitig_52	438192	438602	411	1	1
TRINITY_DN20597_c0_g1	unitig_46	2819772	2820139	368	1	1
TRINITY_DN20724_c0_g1	unitig_22	609442	609677	236	1	1
TRINITY_DN21105_c0_g1	unitig_21	1509362	1509638	277	1	1
TRINITY_DN21233_c0_g1	unitig_85	626195	626542	348	1	1
TRINITY_DN21252_c0_g1	unitig_92	361695	361967	273	1	1
TRINITY_DN21448_c0_g1	unitig_748	1195110	1195466	357	1	1
TRINITY_DN21580_c0_g1	unitig_52	2330510	2330748	239	1	1
TRINITY_DN22052_c0_g1	unitig_0	8183917	8184147	231	1	1
TRINITY_DN22486_c0_g1	unitig_578	2600864	2601145	282	1	1
TRINITY_DN23204_c0_g1	unitig_46	2477937	2478538	602	1	1
TRINITY_DN23224_c0_g1	unitig_749	2712740	2713302	563	1	1
TRINITY_DN23226_c0_g1	unitig_749	3141831	3142052	222	1	1
TRINITY_DN23558_c0_g1	unitig_26	773811	774086	276	1	1
TRINITY_DN23623_c0_g1	unitig_46	1893431	1893777	347	1	1
TRINITY_DN23880_c0_g1	unitig_62	1943376	1943578	203	1	1
TRINITY_DN23982_c0_g1	unitig_85	22683	23008	216	1	2
TRINITY_DN24217_c0_g1	unitig_0	2578735	2579036	302	1	1
TRINITY_DN24326_c0_g1	unitig_52	2576073	2576487	415	1	1
TRINITY_DN24385_c0_g1	unitig_26	1765132	1765410	279	1	1
TRINITY_DN24762_c0_g1	unitig_21	1471417	1471810	394	1	1
TRINITY_DN24949_c0_g1	unitig_699	2914596	2914836	241	1	1
TRINITY_DN25224_c0_g1	unitig_8	1008507	1008749	272	1	1
TRINITY_DN25697_c0_g1	unitig_747	1165085	1165290	206	1	1
TRINITY_DN25750_c0_g1	unitig_52	2308937	2309162	226	1	1
TRINITY_DN2586_c0_g1	unitig_748	4424047	4424344	304	1	1
TRINITY_DN26715_c0_g1	unitig_46	2678461	2678847	387	1	1
TRINITY_DN26986_c0_g1	unitig_22	4075507	4075853	352	1	1
TRINITY_DN27037_c0_g1	unitig_748	720076	720356	281	1	1
TRINITY_DN27783_c0_g1	unitig_92	167992	168247	256	1	1
TRINITY_DN27906_c0_g1	unitig_26	2237188	2237461	274	1	1
TRINITY_DN27939_c0_g1	unitig_26	3306565	3306875	311	1	1
TRINITY_DN28043_c0_g1	unitig_747	463540	463951	413	1	1
TRINITY_DN28301_c0_g1	unitig_899	1535437	1535774	338	1	1
TRINITY_DN28491_c0_g1	unitig_578	3171818	3172095	278	1	1
TRINITY_DN28640_c0_g1	unitig_61	280958	281467	225	1	2
TRINITY_DN28663_c0_g1	unitig_62	2629866	2630171	307	1	1
TRINITY_DN28734_c0_g1	unitig_749	2621117	2621454	338	1	1
TRINITY_DN28779_c0_g1	unitig_899	3373445	3373740	296	1	1
TRINITY_DN28915_c0_g1	unitig_0	1650397	1650817	421	1	1
TRINITY_DN29807_c0_g1	unitig_22	5198053	5198512	461	1	1
TRINITY_DN29945_c0_g1	unitig_46	1797734	1797974	241	1	1
TRINITY_DN30267_c0_g1	unitig_748	5106167	5106454	288	1	1
TRINITY_DN30486_c0_g1	unitig_22	745980	746314	335	1	1
TRINITY_DN3077_c0_g1	unitig_748	5225305	5225520	216	1	1
TRINITY_DN30851_c0_g1	unitig_0	471733	471996	264	1	1
TRINITY_DN30893_c0_g1	unitig_749	2373075	2373292	218	1	1
TRINITY_DN3089_c0_g1	unitig_32	650875	651281	407	1	1
TRINITY_DN30996_c0_g1	unitig_26	3781164	3781655	423	1	2
TRINITY_DN31005_c0_g1	unitig_92	278923	279244	322	1	1
TRINITY_DN31888_c0_g1	unitig_37	174121	174393	275	1	1
TRINITY_DN32096_c0_g1	unitig_747	1325548	1325989	442	1	1
TRINITY_DN32113_c0_g1	unitig_52	2923792	2924037	246	1	1
TRINITY_DN32152_c0_g1	unitig_699	2845050	2845350	302	1	1
TRINITY_DN32361_c0_g2	unitig_578	1762532	1762813	282	1	1
TRINITY_DN3359_c0_g2	unitig_32	3326907	3327622	586	1	2
TRINITY_DN3634_c0_g1	unitig_88	180408	180744	262	1	2
TRINITY_DN4371_c1_g1	unitig_744	1996985	1997852	321	-1	2
TRINITY_DN444_c0_g1	unitig_21	1087320	1088102	327	-1	2
TRINITY_DN4499_c0_g1	unitig_22	5032247	5032829	583	1	1
TRINITY_DN5324_c1_g1	unitig_578	1161122	1161491	370	1	1
TRINITY_DN5698_c0_g2	unitig_52	1334118	1334382	265	1	1
TRINITY_DN5966_c0_g1	unitig_746	323027	323246	222	1	1
TRINITY_DN10267_c0_g1	unitig_21	2227281	2227655	310	-1	2
TRINITY_DN10500_c0_g2	unitig_747	1549426	1549708	283	1	1
TRINITY_DN10527_c1_g1	unitig_744	1547654	1547979	326	1	1
TRINITY_DN11524_c0_g2	unitig_21	836999	837371	297	1	2
TRINITY_DN12056_c1_g1	unitig_26	2188277	2188518	242	1	1
TRINITY_DN12146_c1_g1	unitig_37	1506113	1506365	253	1	1
TRINITY_DN12924_c0_g1	unitig_37	458782	459144	366	1	1
TRINITY_DN13562_c0_g1	unitig_21	34366	34587	222	1	1
TRINITY_DN13591_c0_g1	unitig_22	1355784	1356070	287	1	1
TRINITY_DN13693_c0_g1	unitig_85	469332	469749	418	1	1
TRINITY_DN13850_c0_g1	unitig_62	1031392	1031794	403	1	1
TRINITY_DN14239_c0_g1	unitig_21	2044536	2044926	391	1	1
TRINITY_DN14950_c0_g1	unitig_27	1997304	1997679	292	1	2
TRINITY_DN1570_c0_g2	unitig_899	2567099	2567546	229	1	2
TRINITY_DN16006_c0_g1	unitig_61	1674692	1674918	227	1	1
TRINITY_DN16128_c0_g1	unitig_578	763723	764441	564	-1	2
TRINITY_DN16320_c0_g1	unitig_747	908076	908312	242	1	1
TRINITY_DN16394_c0_g1	unitig_62	1415135	1415339	205	1	1
TRINITY_DN16397_c0_g1	unitig_26	3142779	3143572	293	-1	2
TRINITY_DN16405_c0_g1	unitig_32	559402	559672	271	1	1
TRINITY_DN16498_c0_g1	unitig_736	163564	163986	423	1	1
TRINITY_DN16719_c0_g1	unitig_60	631332	631585	254	1	1
TRINITY_DN16857_c0_g1	unitig_52	1385346	1385601	256	1	1
TRINITY_DN16903_c0_g1	unitig_32	3479600	3479971	372	1	1
TRINITY_DN17838_c0_g1	unitig_21	1490778	1490999	222	1	1
TRINITY_DN17859_c0_g1	unitig_32	751489	751711	223	1	1
TRINITY_DN18282_c0_g1	unitig_21	1306247	1306736	490	1	1
TRINITY_DN18509_c0_g1	unitig_0	3905197	3905554	358	1	1
TRINITY_DN18782_c0_g1	unitig_748	1194123	1194772	650	1	1
TRINITY_DN1879_c0_g1	unitig_0	4996732	4997555	354	-1	4
TRINITY_DN1895_c0_g1	unitig_899	2569438	2569665	228	1	1
TRINITY_DN19986_c0_g1	unitig_62	2480873	2481111	246	1	1
TRINITY_DN20051_c0_g1	unitig_26	1369772	1369999	228	1	1
TRINITY_DN20190_c0_g1	unitig_32	27967	28223	257	1	1
TRINITY_DN2073_c0_g2	unitig_60	347898	348177	281	1	1
TRINITY_DN20916_c0_g1	unitig_699	1321909	1322134	226	1	1
TRINITY_DN21051_c0_g1	unitig_699	3072373	3072646	282	1	1
TRINITY_DN21262_c0_g1	unitig_37	2059590	2060232	209	1	2
TRINITY_DN21302_c0_g1	unitig_26	1939530	1940051	522	1	1
TRINITY_DN21319_c0_g1	unitig_0	4416708	4417251	387	-1	2
TRINITY_DN21436_c0_g1	unitig_736	586732	587048	317	1	1
TRINITY_DN21539_c0_g1	unitig_26	1699699	1699951	253	1	1
TRINITY_DN22076_c0_g1	unitig_52	258720	258951	232	1	1
TRINITY_DN22566_c0_g1	unitig_88	495249	495478	230	1	1
TRINITY_DN22793_c0_g1	unitig_62	2076602	2076862	263	1	1
TRINITY_DN23146_c0_g1	unitig_27	1833065	1833376	314	1	1
TRINITY_DN23312_c0_g1	unitig_52	324237	324522	287	1	1
TRINITY_DN23366_c0_g1	unitig_747	2425119	2425439	321	1	1
TRINITY_DN23482_c0_g1	unitig_26	2486081	2486419	339	1	1
TRINITY_DN24018_c0_g1	unitig_22	6067436	6067798	363	1	1
TRINITY_DN24066_c0_g1	unitig_21	1097498	1097747	250	1	1
TRINITY_DN24067_c0_g1	unitig_85	423562	423844	293	1	1
TRINITY_DN24121_c0_g1	unitig_46	1303355	1303836	484	1	1
TRINITY_DN24266_c0_g1	unitig_88	222147	222386	240	1	1
TRINITY_DN24774_c0_g1	unitig_746	557208	557561	354	1	1
TRINITY_DN24887_c0_g1	unitig_37	1725247	1725515	269	1	1
TRINITY_DN25033_c0_g1	unitig_578	2663815	2664172	358	1	1
TRINITY_DN25099_c0_g1	unitig_699	1788058	1788375	318	1	1
TRINITY_DN25132_c0_g1	unitig_62	1564777	1565175	403	1	1
TRINITY_DN26714_c0_g1	unitig_52	1244489	1244706	260	-1	1
TRINITY_DN26780_c0_g1	unitig_21	174568	174868	302	1	1
TRINITY_DN27298_c0_g1	unitig_21	942122	942446	237	1	2
TRINITY_DN27374_c0_g1	unitig_0	1171088	1171328	248	1	1
TRINITY_DN27412_c0_g1	unitig_22	3526785	3527211	304	1	2
TRINITY_DN2745_c0_g2	unitig_899	1415348	1415617	270	1	1
TRINITY_DN27508_c0_g1	unitig_750	204673	204940	268	1	1
TRINITY_DN27533_c0_g1	unitig_0	7764236	7764645	227	-1	2
TRINITY_DN27662_c0_g1	unitig_26	3602094	3602364	271	1	1
TRINITY_DN27688_c0_g1	unitig_899	1761005	1761207	218	-1	1
TRINITY_DN27728_c0_g1	unitig_750	36922	37198	277	1	1
TRINITY_DN27801_c0_g1	unitig_90	78324	78683	360	1	1
TRINITY_DN27975_c0_g1	unitig_578	2760407	2761094	689	1	1
[truncated: 2,297 more rows]
