# Supplementary material for: Atypical DNA methylation, sRNA-size distribution, and female gametogenesis in Utricularia gibba
Source: Sci Rep. 2021 Aug 3;11:15725. doi: 10.1038/s41598-021-95054-y (PMC8333044; doi:10.1038/s41598-021-95054-y)
Supplement: Supplementary file 4 — Supplementary Information 4. [file 41598_2021_95054_MOESM4_ESM.xlsx]

## Sheet: All results
Dataset S3. Results from ShortStack small RNAs loci identification.
#Locus	Name	Length	Reads	RPM	UniqueReads	FracTop	Strand	MajorRNA	MajorRNAReads	Complexity	DicerCall	MIRNA	PhaseScore	Short	Long	20	21	22	23	24
unitig_0:20142-20575	Cluster_1	434	25	2.451	0	0.44	0	GCCGAGGGC	8	0.64	N	N2	-1	21	3	1	0	0	0	0
unitig_0:32526-32540	Cluster_2	15	24	2.353	0	1	+	AGAAUGAAACUCAA	13	0.167	N	N2	-1	24	0	0	0	0	0	0
unitig_0:66960-67034	Cluster_3	75	39	3.823	0	0	-	AUGACUCCUCUCCU	34	0.128	N	N2	-1	39	0	0	0	0	0	0
unitig_0:67621-67627	Cluster_4	7	45	4.411	0	1	+	CCCGUGG	44	0.044	N	N2	-1	45	0	0	0	0	0	0
unitig_0:69259-69341	Cluster_5	83	63	6.176	0	0.984	+	GCCGGGGC	20	0.111	N	N2	-1	63	0	0	0	0	0	0
unitig_0:93047-93207	Cluster_6	161	42	4.117	0	0.143	-	CCGGCCGGCGGCUGCC	9	0.429	N	N2	-1	42	0	0	0	0	0	0
unitig_0:98448-98587	Cluster_7	140	27	2.647	0	0.741	0	UUCCCCUGACGGCGCCA	15	0.222	N	N2	-1	20	0	7	0	0	0	0
unitig_0:108362-108456	Cluster_8	95	56	5.49	0	0.036	-	CCCAGCAGCCACACCA	51	0.089	N	N2	-1	55	0	0	1	0	0	0
unitig_0:127095-127690	Cluster_9	596	52	5.097	0	0.942	+	GCCGGGGC	13	0.5	N	N2	-1	36	11	1	0	2	0	2
unitig_0:128879-129892	Cluster_10	1014	39	3.823	0	0.821	+	GUUGAUGUUCCAGACUCUGAAGCACAGGUUG	1	1	N	N2	-1	8	20	0	1	4	1	5
unitig_0:133760-134119	Cluster_11	360	28	2.745	0	0.036	-	UCUUCAUCGGAAUGUCGUCGUGUGCGAUUCACA	1	1	N	N2	-1	6	14	1	2	2	0	3
unitig_0:139943-140037	Cluster_12	95	20	1.961	0	0.85	+	GCCGGGGC	17	0.2	N	N2	-1	19	0	0	0	1	0	0
unitig_0:140932-141251	Cluster_13	320	23	2.255	0	0.478	0	GCCGGGGC	8	0.565	N	N2	-1	17	4	0	1	0	0	1
unitig_0:149215-149433	Cluster_14	219	61	5.98	0	0.77	0	CCCGUGG	43	0.148	N	N2	-1	61	0	0	0	0	0	0
unitig_0:153551-153878	Cluster_15	328	34	3.333	0	0.059	-	UCUUCUUCCAGGACAAAACCUCCACCC	6	0.676	N	N2	-1	9	20	0	1	1	1	2
unitig_0:158166-158273	Cluster_16	108	1382	135.476	0	0.004	-	AUCUCGGUGGGACCUCCA	220	0.266	N	N2	-1	673	514	36	36	16	77	30
unitig_0:164559-164585	Cluster_17	27	22	2.157	0	1	+	UUCCCCACCGGAGUCGCCA	9	0.182	N	N2	-1	22	0	0	0	0	0	0
unitig_0:179249-179462	Cluster_18	214	26	2.549	0	0.923	+	GGGGGCC	4	0.808	N	N2	-1	12	9	1	2	2	0	0
unitig_0:179523-180031	Cluster_19	509	142	13.92	0	0.965	+	CCUGCUCCGUUGUUUGGGAAG	58	0.437	N	N2	-1	16	36	18	63	1	5	3
unitig_0:180578-180730	Cluster_20	153	27	2.647	0	1	+	UAGCGCACCUGUAGAAG	11	0.407	N	N2	-1	23	4	0	0	0	0	0
unitig_0:182287-182412	Cluster_21	126	55	5.392	0	0	-	GGCGGGCC	49	0.109	N	N2	-1	55	0	0	0	0	0	0
unitig_0:228460-229485	Cluster_22	1026	70	6.862	0	0.2	-	UUCUGUGUGAGCUUUGGUUUCC	2	0.971	N	N2	-1	15	35	1	2	7	7	3
unitig_0:229559-230265	Cluster_23	707	37	3.627	0	0.027	-	UUUGCCGGAUGUGCCUGAAAUACU	1	1	N	N2	-1	3	21	2	5	1	1	4
unitig_0:230367-230933	Cluster_24	567	37	3.627	0	0.216	0	GCUCCCACUCGCCA	4	0.838	N	N2	-1	20	14	0	0	2	0	1
unitig_0:236902-236909	Cluster_25	8	68	6.666	0	1	+	CCCGUGG	67	0.029	N	N2	-1	68	0	0	0	0	0	0
unitig_0:251855-251962	Cluster_26	108	32	3.137	0	0.406	0	CGCCGAGGGC	8	0.375	N	N2	-1	32	0	0	0	0	0	0
unitig_0:260442-260507	Cluster_27	66	26	2.549	0	1	+	UCGGGCGUAGCCAAG	22	0.115	N	N2	-1	26	0	0	0	0	0	0
unitig_0:262192-262315	Cluster_28	124	22	2.157	0	0.091	-	CCCGUGG	17	0.273	N	N2	-1	22	0	0	0	0	0	0
unitig_0:265758-265786	Cluster_29	29	22	2.157	0	0	-	UCCCCAACGGAACCA	7	0.409	N	N2	-1	22	0	0	0	0	0	0
unitig_0:266575-266774	Cluster_30	200	421	41.27	0	0.986	+	CGUUCCCGUGG	313	0.033	N	N2	-1	420	1	0	0	0	0	0
unitig_0:299070-299077	Cluster_31	8	22	2.157	0	1	+	GCCGGGGC	22	0.045	N	N2	-1	22	0	0	0	0	0	0
unitig_0:304151-304268	Cluster_32	118	45	4.411	0	0.956	+	CCCGUGG	42	0.089	N	N2	-1	43	1	0	0	1	0	0
unitig_0:306983-306996	Cluster_33	14	25	2.451	0	0	-	CUGUGGGACCUCCA	25	0.04	N	N2	-1	25	0	0	0	0	0	0
unitig_0:315125-315183	Cluster_34	59	39	3.823	0	0.974	+	CCCGUGG	38	0.051	N	N2	-1	39	0	0	0	0	0	0
unitig_0:317752-318167	Cluster_35	416	474	46.466	0	0.046	-	UUCGUUUCACGUCGGGUUCACCA	194	0.192	23	N5	-1	59	13	3	18	8	318	55
unitig_0:319224-321175	Cluster_36	1952	107	10.489	0	0.654	0	AAUACUCUGUUGUGCAUCCGAGC	4	0.869	24	N5	0.5	1	4	1	13	8	22	58
unitig_0:321429-321778	Cluster_37	350	22	2.157	0	0.545	0	AAUGUUACGUCAGGCCUUGUAGCC	3	0.864	24	N5	0.1	1	2	0	3	1	2	13
unitig_0:322659-322872	Cluster_38	214	30	2.941	0	0.433	0	AUGGAUGUUGUUGGAGAUUUGGAU	3	0.767	24	N6	0.6	3	3	0	3	0	5	16
unitig_0:323147-323189	Cluster_39	43	54	5.294	0	0.981	+	CCCGUGG	51	0.056	N	N2	-1	54	0	0	0	0	0	0
unitig_0:323406-323494	Cluster_40	89	82	8.038	0	1	+	CCCGUGG	45	0.11	N	N2	-1	82	0	0	0	0	0	0
unitig_0:324101-324397	Cluster_41	297	34	3.333	0	1	+	GUUUGUCAGGAGUGCUAGGAUUGAGGU	4	0.794	N	N2	-1	8	22	1	0	1	0	2
unitig_0:332904-333032	Cluster_42	129	67	6.568	0	0.985	+	CCCGUGG	65	0.045	N	N2	-1	67	0	0	0	0	0	0
unitig_0:334940-335002	Cluster_43	63	49	4.803	0	0.98	+	UCCUUGCAUCCCU	41	0.143	N	N2	-1	49	0	0	0	0	0	0
unitig_0:368064-368071	Cluster_44	8	59	5.784	0	1	+	CCCGUGG	58	0.034	N	N2	-1	59	0	0	0	0	0	0
unitig_0:369038-369058	Cluster_45	21	192	18.821	0	1	+	UUCCCCCGCAACUCCACCA	164	0.026	N	N2	-1	169	0	23	0	0	0	0
unitig_0:372948-372960	Cluster_46	13	42	4.117	0	1	+	CCCGUGG	38	0.071	N	N2	-1	42	0	0	0	0	0	0
unitig_0:387152-387227	Cluster_47	76	127	12.45	0	0.937	+	GGCGGGCC	115	0.047	N	N2	-1	127	0	0	0	0	0	0
unitig_0:409520-409677	Cluster_48	158	32	3.137	0	0.031	-	CCCGUGG	29	0.125	N	N2	-1	32	0	0	0	0	0	0
unitig_0:412173-412186	Cluster_49	14	36	3.529	0	1	+	AUCACCUCCU	17	0.139	N	N2	-1	36	0	0	0	0	0	0
unitig_0:413992-413998	Cluster_50	7	56	5.49	0	1	+	CCCGUGG	56	0.018	N	N2	-1	56	0	0	0	0	0	0
unitig_0:439245-439279	Cluster_51	35	20	1.961	0	0.95	+	GUUCCUCGCACCA	18	0.15	N	N2	-1	20	0	0	0	0	0	0
unitig_0:442832-442845	Cluster_52	14	32	3.137	0	0.094	-	CCGAGGACCCUA	18	0.156	N	N2	-1	32	0	0	0	0	0	0
unitig_0:444721-444809	Cluster_53	89	29	2.843	0	0.483	0	CGACCGGCCGGACUCU	11	0.345	N	N2	-1	29	0	0	0	0	0	0
unitig_0:479134-479169	Cluster_54	36	51	4.999	0	0.02	-	GGCGGGCC	46	0.098	N	N2	-1	50	1	0	0	0	0	0
unitig_0:486943-487011	Cluster_55	69	37	3.627	0	0.027	-	UUUCCCGGCUUCCACCA	11	0.297	N	N2	-1	36	0	0	1	0	0	0
unitig_0:490973-491103	Cluster_56	131	30	2.941	0	1	+	CCCGUGG	28	0.1	N	N2	-1	30	0	0	0	0	0	0
unitig_0:492609-492771	Cluster_57	163	4270	418.582	0	1	+	GCACCAGUGGUCUAGUGGUAGAAUAGUACCCU	541	0.135	N	N2	-1	366	3693	30	47	35	57	42
unitig_0:517708-519139	Cluster_58	1432	123	12.058	0	0.439	0	UGCAACAAUCCAUCGGACCGA	4	0.894	N	N2	-1	15	17	3	51	31	5	1
unitig_0:519798-519818	Cluster_59	21	59	5.784	0	0	-	GCAAACCACUCUCGGCAA	12	0.492	N	N2	-1	58	0	1	0	0	0	0
unitig_0:519969-519980	Cluster_60	12	25	2.451	0	1	+	CAUCUCCACCA	18	0.16	N	N2	-1	25	0	0	0	0	0	0
unitig_0:522413-522548	Cluster_61	136	32	3.137	0	0.094	-	UAGACUUGAAC	15	0.281	N	N2	-1	32	0	0	0	0	0	0
unitig_0:532888-532897	Cluster_62	10	44	4.313	0	0.977	+	CCCGUGG	41	0.068	N	N2	-1	44	0	0	0	0	0	0
unitig_0:534215-534290	Cluster_63	76	22	2.157	0	0.955	+	AUCACCUCCU	20	0.136	N	N2	-1	21	1	0	0	0	0	0
unitig_0:535370-535828	Cluster_64	459	22	2.157	0	0.364	0	GCGGGCC	4	0.818	N	N2	-1	8	8	2	3	0	0	1
unitig_0:545074-545209	Cluster_65	136	26	2.549	0	0.923	+	GUGGGUGUAGCUCAUA	21	0.192	N	N2	-1	21	3	1	1	0	0	0
unitig_0:572695-572895	Cluster_66	201	20	1.961	0	1	+	AAAGAUCAGGAUGUCAACUACUCACACUA	2	0.9	N	N2	-1	2	12	0	1	2	2	1
unitig_0:581037-581317	Cluster_67	281	52	5.097	0	0.058	-	GGCGGGCC	47	0.115	N	N2	-1	50	1	0	1	0	0	0
unitig_0:584832-584845	Cluster_68	14	55	5.392	0	0.018	-	GGCGGGCC	45	0.073	N	N2	-1	55	0	0	0	0	0	0
unitig_0:621677-621709	Cluster_69	33	22	2.157	0	1	+	GGCGCGGCU	14	0.182	N	N2	-1	22	0	0	0	0	0	0
unitig_0:640794-640842	Cluster_70	49	52	5.097	0	0.019	-	AGCCUGAUUUUCCCUACCA	29	0.173	N	N2	-1	48	1	3	0	0	0	0
unitig_0:644294-644419	Cluster_71	126	1238	121.359	0	1	+	UGUCGAUGAUGACAAAAUCAAGGCUUGUUUCUCA	535	0.12	N	N2	-1	217	839	46	52	19	27	38
unitig_0:644531-644654	Cluster_72	124	175	17.155	0	1	+	GUCCAUGAUGAUAAAAUCAAGGCUUGUUUCUCA	93	0.309	N	N2	-1	24	147	0	0	2	1	1
unitig_0:644765-644899	Cluster_73	135	181	17.743	0	1	+	UGUCUAUGAUGAUAAAAUCAAGGCUUGUUUCUCA	39	0.348	N	N2	-1	32	108	7	9	10	6	9
unitig_0:645002-645222	Cluster_74	221	151	14.802	0	1	+	CAUCUAUGAUGACAAUCCUAAGGCU	13	0.457	N	N2	-1	44	84	0	1	2	4	16
unitig_0:658878-658893	Cluster_75	16	52	5.097	0	1	+	CCCGUGG	41	0.115	N	N2	-1	52	0	0	0	0	0	0
unitig_0:712634-712879	Cluster_76	246	24468	2398.56	0	1	+	UUCCGGUGAUGAUAAUUCUGCAAUUCUGAGGCU	13343	0.025	N	N2	-1	436	23878	22	22	23	38	49
unitig_0:720450-720673	Cluster_77	224	31	3.039	0	0	-	CCCGUGG	11	0.29	N	N2	-1	31	0	0	0	0	0	0
unitig_0:728335-728361	Cluster_78	27	29	2.843	0	0.034	-	CCCGUGG	27	0.103	N	N2	-1	29	0	0	0	0	0	0
unitig_0:728486-728564	Cluster_79	79	166	16.273	0	0.994	+	GGCGGGCC	143	0.048	N	N2	-1	165	0	0	1	0	0	0
unitig_0:731587-731624	Cluster_80	38	22	2.157	0	0.045	-	CCCGUGG	20	0.136	N	N2	-1	22	0	0	0	0	0	0
unitig_0:742343-742375	Cluster_81	33	20	1.961	0	0	-	CCCGUGG	19	0.1	N	N2	-1	20	0	0	0	0	0	0
unitig_0:749776-749928	Cluster_82	153	22	2.157	0	0.955	+	UUAACCUUGUGG	20	0.136	N	N2	-1	22	0	0	0	0	0	0
unitig_0:756323-756364	Cluster_83	42	39	3.823	0	0.974	+	CCCGUGG	35	0.103	N	N2	-1	38	1	0	0	0	0	0
unitig_0:762956-762992	Cluster_84	37	52	5.097	0	1	+	CCCGUGG	50	0.058	N	N2	-1	52	0	0	0	0	0	0
unitig_0:779882-780141	Cluster_85	260	28	2.745	0	0.107	-	CCCGUGG	19	0.321	N	N2	-1	22	2	0	3	0	0	1
unitig_0:785665-785692	Cluster_86	28	81	7.94	0	0.012	-	CCUUGGCGUCACGC	58	0.062	N	N2	-1	81	0	0	0	0	0	0
unitig_0:801495-801725	Cluster_87	231	170	16.665	0	0.012	-	UUCCUUGACUAUAUUUUGUAG	76	0.135	21	N11	-1	6	3	0	78	54	25	4
unitig_0:802786-802797	Cluster_88	12	115	11.273	0	1	+	AAUCCCCCCCA	99	0.043	N	N2	-1	115	0	0	0	0	0	0
unitig_0:808659-808715	Cluster_89	57	45	4.411	0	0.067	-	GGCGGGCC	41	0.089	N	N2	-1	45	0	0	0	0	0	0
unitig_0:819411-819419	Cluster_90	9	23	2.255	0	0.913	+	GGCGCGGCU	15	0.174	N	N2	-1	23	0	0	0	0	0	0
unitig_0:819506-819608	Cluster_91	103	26	2.549	0	0.962	+	CCGGGCC	8	0.346	N	N2	-1	24	0	0	2	0	0	0
unitig_0:823909-823988	Cluster_92	80	76	7.45	0	0.039	-	CCUUGGCGUCACGC	47	0.118	N	N2	-1	76	0	0	0	0	0	0
unitig_0:826585-827058	Cluster_93	474	22	2.157	0	1	+	GGUGGCUGUA	3	0.864	N	N2	-1	6	12	1	0	2	0	1
unitig_0:859773-859871	Cluster_94	99	25	2.451	0	0.08	-	CCCGUGG	19	0.28	N	N2	-1	23	2	0	0	0	0	0
unitig_0:875181-876119	Cluster_95	939	155	15.194	0	0.419	0	CCUCGGCG	9	0.755	22	N4	1.9	26	5	2	53	62	7	0
unitig_0:894708-894834	Cluster_96	127	33	3.235	0	0.97	+	UCCCAUCGCCAUCGCCA	18	0.273	N	N2	-1	33	0	0	0	0	0	0
unitig_0:896794-896807	Cluster_97	14	64	6.274	0	1	+	CCCGUGG	54	0.078	N	N2	-1	64	0	0	0	0	0	0
unitig_0:901113-901181	Cluster_98	69	46	4.509	0	1	+	CCCGUGG	44	0.065	N	N2	-1	46	0	0	0	0	0	0
unitig_0:912298-912371	Cluster_99	74	39	3.823	0	0.026	-	GGGGGUGUAGCUCAUU	16	0.154	N	N2	-1	38	1	0	0	0	0	0
unitig_0:912561-912599	Cluster_100	39	26	2.549	0	0.038	-	CCCGUGG	23	0.154	N	N2	-1	25	1	0	0	0	0	0
unitig_0:913589-913666	Cluster_101	78	45	4.411	0	1	+	CCCGUGG	31	0.111	N	N2	-1	44	1	0	0	0	0	0
unitig_0:919841-920126	Cluster_102	286	20	1.961	0	0.55	0	UGUCCCGGCAAGCAACCA	4	0.75	N	N2	-1	13	4	0	1	1	0	1
unitig_0:925287-925303	Cluster_103	17	21	2.059	0	1	+	CCCUCGGCG	13	0.19	N	N2	-1	21	0	0	0	0	0	0
unitig_0:976179-976298	Cluster_104	120	26	2.549	0	0.192	-	CCCGUGG	13	0.346	N	N2	-1	25	0	1	0	0	0	0
unitig_0:986580-986619	Cluster_105	40	132	12.94	0	0.992	+	GGCGGGCC	114	0.038	N	N2	-1	132	0	0	0	0	0	0
unitig_0:1022072-1022155	Cluster_106	84	71	6.96	0	1	+	CCCGUGG	59	0.07	N	N2	-1	70	1	0	0	0	0	0
unitig_0:1025047-1025882	Cluster_107	836	18904	1853.13	0	0.999	+	CACUACUGCAAGGGCCUGGCGCACCUCAC	4125	0.074	N	N2	-1	323	16950	70	392	683	151	335
unitig_0:1026562-1027151	Cluster_108	590	74	7.254	0	0.27	0	UACUGAGCAUUCAAUGAACUUUUCC	2	0.959	N	N2	-1	8	24	4	17	15	2	4
unitig_0:1035117-1035123	Cluster_109	7	50	4.901	0	1	+	CCCGUGG	50	0.02	N	N2	-1	50	0	0	0	0	0	0
unitig_0:1071117-1071283	Cluster_110	167	1425	139.691	0	0.004	-	AAGCUCAGGAGGGAUAGCGCC	1154	0.035	21	Y	-1	12	4	101	1297	11	0	0
unitig_0:1076562-1076653	Cluster_111	92	2621	256.933	0	1	+	GCACCAGUGGUCUAGUGGUAGAAUAGUACCCU	501	0.173	N	N2	-1	117	2351	22	18	32	54	27
unitig_0:1091543-1091743	Cluster_112	201	25	2.451	0	0.88	+	GAGACACACGGCGGGUG	12	0.48	N	N2	-1	23	1	0	0	1	0	0
unitig_0:1093458-1093642	Cluster_113	185	126	12.352	0	0.976	+	CCCGUGG	60	0.071	N	N2	-1	124	1	0	0	1	0	0
unitig_0:1095633-1095757	Cluster_114	125	52	5.097	0	0.962	+	CCCGUGG	47	0.115	N	N2	-1	51	0	0	0	0	0	1
unitig_0:1103831-1103963	Cluster_115	133	25	2.451	0	0.04	-	CCCGUGG	21	0.2	N	N2	-1	24	0	0	0	0	1	0
unitig_0:1109453-1109494	Cluster_116	42	59	5.784	0	1	+	CCCGUGG	56	0.068	N	N2	-1	59	0	0	0	0	0	0
unitig_0:1118014-1118021	Cluster_117	8	42	4.117	0	0	-	GGCGGGCC	39	0.071	N	N2	-1	42	0	0	0	0	0	0
unitig_0:1118473-1118620	Cluster_118	148	102	9.999	0	0	-	CUGGACGAGGCCAUUAACUACAUUG	14	0.451	N	N2	-1	2	95	2	1	2	0	0
unitig_0:1122582-1122589	Cluster_119	8	54	5.294	0	1	+	CCCGUGG	53	0.037	N	N2	-1	54	0	0	0	0	0	0
unitig_0:1147754-1147769	Cluster_120	16	709	69.502	0	1	+	UGAGUGCUCUCCU	602	0.014	N	N2	-1	709	0	0	0	0	0	0
unitig_0:1160070-1160153	Cluster_121	84	23	2.255	0	0	-	GCCUGCCUGGGC	11	0.261	N	N2	-1	23	0	0	0	0	0	0
unitig_0:1161335-1161612	Cluster_122	278	20	1.961	0	0.6	0	GCGGGCC	5	0.75	N	N2	-1	14	1	1	1	3	0	0
unitig_0:1165701-1165774	Cluster_123	74	53	5.196	0	1	+	CCCGUGG	51	0.057	N	N2	-1	53	0	0	0	0	0	0
unitig_0:1196882-1196947	Cluster_124	66	104	10.195	0	0.981	+	GGCGGGCC	99	0.048	N	N2	-1	104	0	0	0	0	0	0
unitig_0:1197371-1197438	Cluster_125	68	59	5.784	0	0.983	+	CCCGUGG	56	0.068	N	N2	-1	59	0	0	0	0	0	0
unitig_0:1198844-1198888	Cluster_126	45	57	5.588	0	1	+	CCCGUGG	54	0.053	N	N2	-1	56	1	0	0	0	0	0
unitig_0:1200286-1200331	Cluster_127	46	65	6.372	0	1	+	CCCGUGG	41	0.108	N	N2	-1	65	0	0	0	0	0	0
unitig_0:1211110-1211118	Cluster_128	9	148	14.508	0	0.993	+	GGCGGGCC	130	0.034	N	N2	-1	148	0	0	0	0	0	0
unitig_0:1217919-1218082	Cluster_129	164	20	1.961	0	0.95	+	GCCGAGGGC	8	0.3	N	N2	-1	18	0	0	2	0	0	0
unitig_0:1222283-1222456	Cluster_130	174	131	12.842	0	0.061	-	UUCCCCCUCAUCUCCACCA	106	0.115	N	N2	-1	116	1	13	1	0	0	0
unitig_0:1252688-1252694	Cluster_131	7	69	6.764	0	1	+	CCCGUGG	69	0.014	N	N2	-1	69	0	0	0	0	0	0
unitig_0:1254060-1254102	Cluster_132	43	29	2.843	0	0.103	-	CCCACAGACGUCGCCA	19	0.241	N	N2	-1	28	1	0	0	0	0	0
unitig_0:1261979-1262119	Cluster_133	141	108	10.587	0	0.991	+	CCCGUGG	50	0.093	N	N2	-1	107	0	0	1	0	0	0
unitig_0:1262557-1262738	Cluster_134	182	794	77.835	0	0.006	-	AAAUUCGAGCUUUUUAAAACUGAUGCCC	94	0.214	N	N2	-1	181	472	28	41	27	25	20
unitig_0:1262866-1263081	Cluster_135	216	51	4.999	0	0	-	CUCCAAGCAGCCUUGAACAUGU	6	0.627	N	N2	-1	4	35	0	0	6	3	3
unitig_0:1264893-1265126	Cluster_136	234	30	2.941	0	0.967	+	GUCACUGACAUUUUUGAAGUAUUCAG	25	0.2	N	N2	-1	1	29	0	0	0	0	0
unitig_0:1265733-1265895	Cluster_137	163	67	6.568	0	0.015	-	AUGAUUGCUCUCCU	45	0.134	N	N2	-1	66	0	0	1	0	0	0
unitig_0:1271051-1272155	Cluster_138	1105	44	4.313	0	0.455	0	GUGGGACUCCC	3	0.932	N	N2	-1	22	8	2	3	3	1	5
unitig_0:1282107-1282113	Cluster_139	7	64	6.274	0	1	+	CCCGUGG	63	0.031	N	N2	-1	64	0	0	0	0	0	0
unitig_0:1291899-1292025	Cluster_140	127	63	6.176	0	0.968	+	CCCGUGG	59	0.079	N	N2	-1	61	0	0	1	0	0	1
unitig_0:1303843-1303912	Cluster_141	70	61	5.98	0	0.984	+	CCCGUGG	60	0.033	N	N2	-1	61	0	0	0	0	0	0
unitig_0:1305322-1305340	Cluster_142	19	37	3.627	0	0	-	AUCCCUCUCUCUCCUCCA	19	0.081	N	N2	-1	37	0	0	0	0	0	0
unitig_0:1312086-1312115	Cluster_143	30	55	5.392	0	0.982	+	CCCGUGG	53	0.055	N	N2	-1	55	0	0	0	0	0	0
unitig_0:1317471-1317489	Cluster_144	19	101	9.901	0	0	-	UGUGGCAACGAGGACUGA	87	0.079	N	N2	-1	101	0	0	0	0	0	0
unitig_0:1317932-1318000	Cluster_145	69	82	8.038	0	1	+	AGUGCUCUCCU	59	0.085	N	N2	-1	82	0	0	0	0	0	0
unitig_0:1319945-1319951	Cluster_146	7	21	2.059	0	0	-	CCCGUGG	21	0.048	N	N2	-1	21	0	0	0	0	0	0
unitig_0:1322661-1322694	Cluster_147	34	719	70.483	0	0	-	UCUGGUUCCUGGCACCA	635	0.01	N	N2	-1	719	0	0	0	0	0	0
unitig_0:1345414-1345750	Cluster_148	337	30	2.941	0	1	+	GUAGAGCAGGCGACU	4	0.833	N	N2	-1	15	13	0	1	1	0	0
unitig_0:1353016-1353032	Cluster_149	17	68	6.666	0	0	-	CAAUAGUAGGUACCA	39	0.074	N	N2	-1	68	0	0	0	0	0	0
unitig_0:1364701-1364863	Cluster_150	163	1479	144.984	0	0.999	+	GGGCAUUUGGUCUAGUGGUAUGAUUCUCGCUU	177	0.324	N	N2	-1	125	1237	30	26	25	21	15
unitig_0:1369738-1369834	Cluster_151	97	36	3.529	0	0.083	-	CAUCACCCAUGCCUACAG	12	0.167	N	N2	-1	36	0	0	0	0	0	0
unitig_0:1374832-1374838	Cluster_152	7	42	4.117	0	1	+	CCCGUGG	42	0.024	N	N2	-1	42	0	0	0	0	0	0
unitig_0:1384180-1384238	Cluster_153	59	163	15.979	0	1	+	UAUAGCCCUACCA	99	0.092	N	N2	-1	163	0	0	0	0	0	0
unitig_0:1385579-1385627	Cluster_154	49	94	9.215	0	0.968	+	UACCAACUCGGUUUGAACC	91	0.032	N	N2	-1	94	0	0	0	0	0	0
unitig_0:1390428-1390435	Cluster_155	8	137	13.43	0	1	+	GGCGGGCC	132	0.015	N	N2	-1	137	0	0	0	0	0	0
unitig_0:1407990-1408937	Cluster_156	948	75	7.352	0	0.853	+	GCCUGCCUGGGC	26	0.453	N	N2	-1	57	9	0	4	5	0	0
unitig_0:1414070-1414491	Cluster_157	422	2736	268.206	0	0.824	+	UUCUCCAUUCUCGUCUAUUCC	614	0.172	21	N5	-1	72	29	100	1885	481	120	49
unitig_0:1423120-1423209	Cluster_158	90	28	2.745	0	0.107	-	CCCGUGG	24	0.179	N	N2	-1	28	0	0	0	0	0	0
unitig_0:1435135-1435142	Cluster_159	8	34	3.333	0	1	+	CCCGUGG	33	0.059	N	N2	-1	34	0	0	0	0	0	0
unitig_0:1435737-1435748	Cluster_160	12	20	1.961	0	1	+	GGGGUUGUAGCU	18	0.15	N	N2	-1	20	0	0	0	0	0	0
unitig_0:1456996-1457012	Cluster_161	17	657	64.405	0	0	-	CUUAUCUCCACCA	340	0.021	N	N2	-1	657	0	0	0	0	0	0
unitig_0:1467324-1467331	Cluster_162	8	123	12.058	0	1	+	GGCGGGCC	116	0.024	N	N2	-1	123	0	0	0	0	0	0
unitig_0:1480002-1480250	Cluster_163	249	6641	651.008	0	0	-	UUUCUCGGAAUGCCCCCCA	872	0.059	N	N2	-1	2854	2053	250	601	289	388	206
unitig_0:1505900-1505910	Cluster_164	11	77	7.548	0	1	+	CACGUUCCCG	52	0.052	N	N2	-1	77	0	0	0	0	0	0
unitig_0:1527496-1527507	Cluster_165	12	160	15.685	0	1	+	GGCGGGCC	140	0.044	N	N2	-1	160	0	0	0	0	0	0
unitig_0:1543804-1543875	Cluster_166	72	114	11.175	0	0.991	+	GGCGGGCC	108	0.044	N	N2	-1	114	0	0	0	0	0	0
unitig_0:1548980-1548986	Cluster_167	7	47	4.607	0	1	+	CCCGUGG	46	0.043	N	N2	-1	47	0	0	0	0	0	0
unitig_0:1549433-1549848	Cluster_168	416	35	3.431	0	0.971	+	CAACUCCACCA	9	0.771	N	N2	-1	13	15	0	4	1	1	1
unitig_0:1549949-1550601	Cluster_169	653	43	4.215	0	0.814	+	CCCGGGAAGAAGCUGAGCGCC	3	0.93	N	N2	-1	5	22	2	7	3	3	1
unitig_0:1555277-1555667	Cluster_170	391	58	5.686	0	0.983	+	UCCACUGAGAACU	41	0.207	N	N2	-1	51	2	0	0	4	1	0
unitig_0:1555759-1556323	Cluster_171	565	24	2.353	0	0.667	0	UGUUGUCUGGGUGCAAAAACC	1	1	N	N2	-1	5	5	0	8	3	1	2
unitig_0:1563382-1564879	Cluster_172	1498	217	21.272	0	0.654	0	GAGAAUUGACCGUCGACAGCG	10	0.779	N	N2	-1	37	24	9	62	64	16	5
unitig_0:1576744-1576797	Cluster_173	54	48	4.705	0	0	-	CAACGGAACCA	26	0.229	N	N2	-1	45	3	0	0	0	0	0
unitig_0:1578950-1579091	Cluster_174	142	1531	150.082	0	1	+	GGGCAUUUGGUCUAGUGGUAUGAUUCUCGCUUCG	185	0.297	N	N2	-1	132	1236	51	30	30	28	24
unitig_0:1579809-1580665	Cluster_175	857	169	16.567	0	0.633	0	CGUAGUACCGUAAGCACGCCU	7	0.734	N	N2	-1	17	18	5	67	49	9	4
unitig_0:1599694-1599838	Cluster_176	145	14469	1418.38	0	0	-	UGCCUGUGACGAAAACUUCUUGGCCGAAGCUUCAAUAACAUCAAUGCGCA	4715	0.048	N	N2	-1	1034	12781	71	95	355	48	85
unitig_0:1608583-1609177	Cluster_177	595	23	2.255	0	0.087	-	GCCGCCACCGAUCGAAAUUGAAACCGUCGUGUUUC	1	1	N	N2	-1	6	14	0	2	0	1	0
unitig_0:1634229-1634374	Cluster_178	146	28	2.745	0	0.929	+	GUCAAGAUGGCCG	21	0.179	N	N2	-1	28	0	0	0	0	0	0
unitig_0:1637065-1637127	Cluster_179	63	23	2.255	0	0.174	-	CCCGUGG	19	0.174	N	N2	-1	23	0	0	0	0	0	0
unitig_0:1651778-1652293	Cluster_180	516	21	2.059	0	0.952	+	CCCCGGCGGAGAAUCCGAAC	3	0.905	N	N2	-1	7	5	3	3	1	1	1
unitig_0:1663646-1663656	Cluster_181	11	44	4.313	0	0.045	-	GGCGGGCC	40	0.068	N	N2	-1	44	0	0	0	0	0	0
unitig_0:1671324-1671534	Cluster_182	211	57	5.588	0	0.825	+	CGCCGAGGGC	34	0.211	N	N2	-1	56	1	0	0	0	0	0
unitig_0:1673017-1673300	Cluster_183	284	20	1.961	0	0.3	0	CCCGUGG	11	0.45	N	N2	-1	20	0	0	0	0	0	0
unitig_0:1678385-1678558	Cluster_184	174	848	83.128	0	0.002	-	CCGACCUUAGCUCAGUUGGCAGAGCAUGGGACU	121	0.172	N	N2	-1	394	367	31	13	14	19	10
unitig_0:1699811-1699817	Cluster_185	7	60	5.882	0	1	+	CCCGUGG	60	0.017	N	N2	-1	60	0	0	0	0	0	0
unitig_0:1700309-1700315	Cluster_186	7	33	3.235	0	1	+	CCCGUGG	32	0.061	N	N2	-1	33	0	0	0	0	0	0
unitig_0:1704916-1705115	Cluster_187	200	53	5.196	0	0.943	+	CCCGUGG	40	0.245	N	N2	-1	46	1	0	0	1	3	2
unitig_0:1712107-1712205	Cluster_188	99	32	3.137	0	1	+	AUCAGGGAUGACGAAUUGGUGACUGAGGUG	14	0.219	N	N2	-1	2	30	0	0	0	0	0
unitig_0:1716664-1716836	Cluster_189	173	27	2.647	0	0.074	-	UCUCUGAGGCCU	13	0.259	N	N2	-1	24	3	0	0	0	0	0
unitig_0:1725041-1725098	Cluster_190	58	288	28.232	0	0	-	GUUCCUUAAUUGUCUGCAAG	247	0.062	20	N11	-1	11	3	251	15	5	1	2
unitig_0:1739051-1739170	Cluster_191	120	20	1.961	0	0.8	+	CGCGGCGGC	3	0.7	N	N2	-1	19	0	0	0	0	1	0
unitig_0:1748466-1748479	Cluster_192	14	22	2.157	0	0	-	AUGAGUCCUCUCCU	22	0.045	N	N2	-1	22	0	0	0	0	0	0
unitig_0:1756286-1756502	Cluster_193	217	56	5.49	0	0.107	-	CCUCUCUCACCCCACC	7	0.839	N	N2	-1	31	13	5	4	0	0	3
unitig_0:1763106-1763326	Cluster_194	221	49	4.803	0	0.959	+	CCCGUGG	40	0.184	N	N2	-1	46	0	1	2	0	0	0
unitig_0:1771587-1771697	Cluster_195	111	60	5.882	0	1	+	CCCGUGG	53	0.083	N	N2	-1	60	0	0	0	0	0	0
unitig_0:1775734-1775740	Cluster_196	7	72	7.058	0	1	+	CCCGUGG	72	0.014	N	N2	-1	72	0	0	0	0	0	0
unitig_0:1785714-1785720	Cluster_197	7	21	2.059	0	0	-	CCCGUGG	21	0.048	N	N2	-1	21	0	0	0	0	0	0
unitig_0:1795793-1795911	Cluster_198	119	24	2.353	0	0.958	+	GCCGGGGC	18	0.292	N	N2	-1	23	0	0	1	0	0	0
unitig_0:1796958-1796990	Cluster_199	33	89	8.725	0	0	-	CCACUGGAGGUCCGAACC	47	0.09	N	N2	-1	85	0	3	1	0	0	0
unitig_0:1822352-1822611	Cluster_200	260	23	2.255	0	0.609	0	GUGUAUCUGGUUUCUGAUAAAUCU	2	0.913	N	N2	-1	3	3	1	0	2	2	12
unitig_0:1843911-1843951	Cluster_201	41	36	3.529	0	1	+	UCUUGCAUCCCU	17	0.278	N	N2	-1	36	0	0	0	0	0	0
unitig_0:1848890-1848897	Cluster_202	8	36	3.529	0	1	+	CCCGUGG	35	0.056	N	N2	-1	36	0	0	0	0	0	0
unitig_0:1861930-1862354	Cluster_203	425	25	2.451	0	0.72	0	GCGGGCC	9	0.68	N	N2	-1	15	4	0	4	2	0	0
unitig_0:1862981-1862993	Cluster_204	13	49	4.803	0	0	-	AAUGCCCCCCA	46	0.082	N	N2	-1	49	0	0	0	0	0	0
unitig_0:1867544-1867578	Cluster_205	35	95	9.313	0	1	+	GUUCCCGUGG	48	0.042	N	N2	-1	94	1	0	0	0	0	0
unitig_0:1902824-1903044	Cluster_206	221	36	3.529	0	0.944	+	GAAGGAUCAUUG	14	0.25	N	N2	-1	35	1	0	0	0	0	0
unitig_0:1904527-1904533	Cluster_207	7	33	3.235	0	1	+	CCCGUGG	32	0.061	N	N2	-1	33	0	0	0	0	0	0
unitig_0:1906805-1906830	Cluster_208	26	55	5.392	0	0.982	+	CCCGUGG	52	0.073	N	N2	-1	54	0	0	0	0	1	0
unitig_0:1907459-1907859	Cluster_209	401	22	2.157	0	0.409	0	CACCUCCACCA	4	0.864	N	N2	-1	12	8	0	0	0	0	2
unitig_0:1907965-1908184	Cluster_210	220	26	2.549	0	0.077	-	CUCUACGCCAGGAU	10	0.654	N	N2	-1	15	10	0	0	0	1	0
unitig_0:1911187-1911991	Cluster_211	805	51	4.999	0	0.098	-	CCUGCCUGGGC	4	0.902	N	N2	-1	14	27	0	1	4	1	4
unitig_0:1912690-1913654	Cluster_212	965	47	4.607	0	0.043	-	UGCCUUGACUUUUCUUUCUGAACAG	3	0.936	N	N2	-1	5	32	3	3	2	0	2
unitig_0:1913906-1913912	Cluster_213	7	27	2.647	0	0	-	CCCGUGG	26	0.074	N	N2	-1	27	0	0	0	0	0	0
unitig_0:1914047-1914226	Cluster_214	180	144	14.116	0	0.951	+	GGCGGGCC	115	0.049	N	N2	-1	144	0	0	0	0	0	0
unitig_0:1919489-1919499	Cluster_215	11	64	6.274	0	0.984	+	CCCGUGG	62	0.047	N	N2	-1	64	0	0	0	0	0	0
unitig_0:1944261-1944428	Cluster_216	168	211	20.684	0	1	+	AAUGCCCCCCA	179	0.028	N	N2	-1	208	3	0	0	0	0	0
unitig_0:1967447-1967584	Cluster_217	138	129	12.646	0	0.984	+	GGCGGGCC	109	0.07	N	N2	-1	128	1	0	0	0	0	0
unitig_0:1974075-1974155	Cluster_218	81	50	4.901	0	0.98	+	CCCGUGG	37	0.12	N	N2	-1	50	0	0	0	0	0	0
unitig_0:1982454-1982485	Cluster_219	32	44	4.313	0	1	+	CCCGUGG	42	0.068	N	N2	-1	44	0	0	0	0	0	0
unitig_0:1993361-1993391	Cluster_220	31	210	20.586	0	1	+	AUCCUUAACUUAGUCUUCAG	122	0.076	20	N11	-1	2	8	122	64	2	10	2
unitig_0:2004055-2004239	Cluster_221	185	136	13.332	0	0.007	-	UCCGAGACCGAUAGAAUGA	7	0.743	N	N2	-1	19	93	5	5	5	6	3
unitig_0:2009215-2009577	Cluster_222	363	35	3.431	0	0.057	-	CCCGUGG	17	0.543	N	N2	-1	21	12	1	1	0	0	0
unitig_0:2015022-2015993	Cluster_223	972	65	6.372	0	0.615	0	GCCGGGGC	6	0.846	N	N2	-1	21	14	1	12	12	2	3
unitig_0:2024525-2024714	Cluster_224	190	30	2.941	0	0.367	0	UUCCCCACGACGGCGCCA	10	0.4	N	N2	-1	28	2	0	0	0	0	0
unitig_0:2045302-2045506	Cluster_225	205	31	3.039	0	0.581	0	GCCGGGGC	7	0.548	N	N2	-1	13	15	0	1	1	0	1
unitig_0:2047677-2047956	Cluster_226	280	30	2.941	0	0.133	-	CCCGUGG	21	0.267	N	N2	-1	26	4	0	0	0	0	0
unitig_0:2048033-2048126	Cluster_227	94	64	6.274	0	0.969	+	CCUCGGCGUCACGC	42	0.188	N	N2	-1	63	1	0	0	0	0	0
unitig_0:2051734-2051809	Cluster_228	76	42	4.117	0	1	+	CUUAAUGACAUUUUCUUAUCCAG	13	0.31	N	N2	-1	0	12	2	2	0	13	13
unitig_0:2062598-2063610	Cluster_229	1013	2788	273.304	0	0.893	+	UCUUGAACCAAAACCCCCGUUU	699	0.2	22	N5	-1	56	34	39	927	1599	76	57
unitig_0:2064859-2065981	Cluster_230	1123	3358	329.18	0	0.978	+	UUUAUCCCGAGAUGUGGAACCC	208	0.187	22	N5	-1	61	42	84	1407	1659	84	21
unitig_0:2067499-2068467	Cluster_231	969	402	39.407	0	0.861	+	UUCCACCUUUCUUGAACUG	80	0.42	N	N2	-1	200	13	9	75	59	9	37
unitig_0:2074044-2074928	Cluster_232	885	318	31.173	0	0.83	+	UCCCGGCAACGAACCA	23	0.484	N	N2	-1	91	5	4	77	79	14	48
unitig_0:2078539-2078845	Cluster_233	307	22	2.157	0	0	-	CCCGUGG	16	0.318	N	N2	-1	17	3	0	0	1	1	0
unitig_0:2078940-2079200	Cluster_234	261	23	2.255	0	0.261	0	CCCGUGG	9	0.565	N	N2	-1	17	3	0	2	1	0	0
unitig_0:2082743-2082749	Cluster_235	7	33	3.235	0	0	-	CCCGUGG	33	0.03	N	N2	-1	33	0	0	0	0	0	0
unitig_0:2085990-2086076	Cluster_236	87	24	2.353	0	1	+	CCCGUGG	23	0.083	N	N2	-1	24	0	0	0	0	0	0
unitig_0:2089056-2089062	Cluster_237	7	20	1.961	0	0	-	CCCGUGG	20	0.05	N	N2	-1	20	0	0	0	0	0	0
unitig_0:2102355-2102429	Cluster_238	75	20	1.961	0	0.9	+	GGCGCGGCU	8	0.4	N	N2	-1	19	0	0	0	0	0	1
unitig_0:2105927-2106503	Cluster_239	577	24	2.353	0	0.958	+	CCUCGGCGACUCC	1	1	N	N2	-1	6	17	0	0	0	1	0
unitig_0:2120441-2120491	Cluster_240	51	54	5.294	0	0.037	-	GGCGGGCC	50	0.074	N	N2	-1	52	2	0	0	0	0	0
unitig_0:2122225-2122234	Cluster_241	10	43	4.215	0	0	-	CCCGUGG	21	0.07	N	N2	-1	43	0	0	0	0	0	0
unitig_0:2123705-2123829	Cluster_242	125	63	6.176	0	0.984	+	CCCGUGG	54	0.111	N	N2	-1	62	1	0	0	0	0	0
unitig_0:2141396-2141414	Cluster_243	19	70	6.862	0	0	-	AAUCCUGUCUCCGCAACCA	16	0.143	N	N2	-1	70	0	0	0	0	0	0
unitig_0:2144217-2144320	Cluster_244	104	3344	327.808	0	1	+	GGGGGUGUAGCUCAUA	2010	0.066	N	N2	-1	2662	355	62	55	20	143	47
unitig_0:2145142-2145247	Cluster_245	106	129	12.646	0	0.977	+	CAACGGAACCA	104	0.078	N	N2	-1	128	1	0	0	0	0	0
unitig_0:2148099-2148105	Cluster_246	7	44	4.313	0	1	+	CCCGUGG	44	0.023	N	N2	-1	44	0	0	0	0	0	0
unitig_0:2168389-2168663	Cluster_247	275	20	1.961	0	0.65	0	CGGGGGUCGUCGC	5	0.6	N	N2	-1	16	1	0	1	2	0	0
unitig_0:2171275-2171309	Cluster_248	35	176	17.253	0	1	+	CACCAUGAUGUUAUUCUGAGACA	74	0.153	23	N11	-1	1	10	0	0	4	128	33
unitig_0:2188432-2188440	Cluster_249	9	29	2.843	0	0	-	CCCGUGG	22	0.138	N	N2	-1	29	0	0	0	0	0	0
unitig_0:2227985-2228092	Cluster_250	108	27	2.647	0	0.889	+	CCCCCGGCGGCC	11	0.37	N	N2	-1	24	2	1	0	0	0	0
unitig_0:2228170-2229418	Cluster_251	1249	61	5.98	0	0.639	0	CCGGGCC	6	0.902	N	N2	-1	16	9	0	13	20	2	1
unitig_0:2238954-2238963	Cluster_252	10	56	5.49	0	0	-	GGCGGGCC	52	0.071	N	N2	-1	56	0	0	0	0	0	0
unitig_0:2239752-2239768	Cluster_253	17	70	6.862	0	0	-	GUUCCCGUGG	22	0.114	N	N2	-1	70	0	0	0	0	0	0
unitig_0:2263138-2263170	Cluster_254	33	42	4.117	0	0	-	CCCGGCAACGGAACC	18	0.19	N	N2	-1	41	1	0	0	0	0	0
unitig_0:2269457-2269465	Cluster_255	9	47	4.607	0	1	+	CCCGUGG	45	0.064	N	N2	-1	47	0	0	0	0	0	0
unitig_0:2281256-2281325	Cluster_256	70	66	6.47	0	0.97	+	CCCGUGG	64	0.045	N	N2	-1	66	0	0	0	0	0	0
unitig_0:2295978-2297491	Cluster_257	1514	67	6.568	0	0.537	0	AGGGCAAAGAACCGUCUGAAACGA	3	0.925	24	N5	0.3	6	3	1	9	6	6	36
unitig_0:2297622-2297744	Cluster_258	123	37	3.627	0	0.784	0	AGUGGCAACGGAACCUGGAACCCC	6	0.568	N	N2	-1	5	3	1	6	0	0	22
unitig_0:2297980-2298370	Cluster_259	391	34	3.333	0	0.353	0	AAGACCCUGAGAUAGCUGAUCUGG	8	0.706	24	N5	0.3	0	5	0	6	1	3	19
unitig_0:2298473-2298694	Cluster_260	222	20	1.961	0	1	+	UUGGAAGAACAAGACUUAUAUACU	3	0.75	24	N11	-1	2	2	0	3	0	0	13
unitig_0:2298807-2300006	Cluster_261	1200	53	5.196	0	0.566	0	AGACAUCAGACUUAUCACUCAAGG	2	0.925	24	N5	1	4	6	1	11	2	4	25
unitig_0:2303627-2303635	Cluster_262	9	64	6.274	0	1	+	CCCGUGG	56	0.047	N	N2	-1	64	0	0	0	0	0	0
unitig_0:2306860-2307001	Cluster_263	142	61	5.98	0	0.967	+	CCCGUGG	48	0.164	N	N2	-1	59	1	1	0	0	0	0
unitig_0:2320832-2320843	Cluster_264	12	21	2.059	0	1	+	GUUGGACCUCCA	14	0.19	N	N2	-1	21	0	0	0	0	0	0
unitig_0:2324244-2324539	Cluster_265	296	123	12.058	0	1	+	GGAAAUGAUGGCAAAAGUAAAAGGUCUGAGCAGC	20	0.39	N	N2	-1	9	106	3	2	1	0	2
unitig_0:2324633-2324645	Cluster_266	13	25	2.451	0	1	+	AUGUCUGAGGCAA	17	0.08	N	N2	-1	25	0	0	0	0	0	0
unitig_0:2324919-2324925	Cluster_267	7	51	4.999	0	1	+	CCCGUGG	51	0.02	N	N2	-1	51	0	0	0	0	0	0
unitig_0:2337393-2337410	Cluster_268	18	76	7.45	0	1	+	CGGACUGGGA	20	0.197	N	N2	-1	76	0	0	0	0	0	0
unitig_0:2348003-2348012	Cluster_269	10	43	4.215	0	0	-	CCCGUGG	21	0.14	N	N2	-1	43	0	0	0	0	0	0
unitig_0:2354317-2354430	Cluster_270	114	184	18.037	0	1	+	GCCGUCUUAGCUCAGUCGG	38	0.418	N	N2	-1	100	37	16	18	2	2	9
unitig_0:2365092-2365628	Cluster_271	537	45	4.411	0	0.578	0	UCAAGUUCAAUGGACUGGCCU	4	0.844	21	N5	0.8	3	6	2	21	9	0	4
unitig_0:2389321-2389472	Cluster_272	152	143	14.018	0	1	+	CAUGAGAAAGCCCUA	6	0.678	N	N2	-1	38	79	8	8	3	0	7
unitig_0:2395342-2396280	Cluster_273	939	49	4.803	0	0.306	0	GCCGGGGCC	7	0.755	N	N2	-1	18	0	1	11	17	2	0
unitig_0:2400194-2400375	Cluster_274	182	269	26.37	0	0.074	-	CCACCACGUUCCCGUGG	233	0.048	N	N2	-1	268	1	0	0	0	0	0
unitig_0:2408769-2408821	Cluster_275	53	43	4.215	0	0.186	-	CGCGGCCCCUGCA	16	0.279	N	N2	-1	42	1	0	0	0	0	0
unitig_0:2409791-2409855	Cluster_276	65	53	5.196	0	0.981	+	CCCGUGG	48	0.075	N	N2	-1	53	0	0	0	0	0	0
unitig_0:2432956-2433025	Cluster_277	70	85	8.332	0	0.965	+	GCCGGGGC	23	0.129	N	N2	-1	85	0	0	0	0	0	0
unitig_0:2438952-2439134	Cluster_278	183	45	4.411	0	0.111	-	UUCGGUAACAAGAUUUCUCUGCAAAC	6	0.489	N	N2	-1	6	38	0	0	0	0	1
unitig_0:2452247-2452261	Cluster_279	15	128	12.548	0	0.992	+	GGCGGGCC	125	0.023	N	N2	-1	128	0	0	0	0	0	0
unitig_0:2457678-2457709	Cluster_280	32	24	2.353	0	0	-	AUGCUUCAUAUUGGGUUCAAGCAG	9	0.25	N	N2	-1	0	5	0	1	0	9	9
unitig_0:2461057-2461101	Cluster_281	45	21	2.059	0	0.952	+	CAUCUCCACCA	17	0.19	N	N2	-1	20	0	0	0	0	1	0
unitig_0:2463531-2463545	Cluster_282	15	76	7.45	0	1	+	CCCGUGG	75	0.026	N	N2	-1	76	0	0	0	0	0	0
unitig_0:2465087-2465173	Cluster_283	87	60	5.882	0	0.983	+	AAUCCUCCCUCUCCCACCA	42	0.117	N	N2	-1	60	0	0	0	0	0	0
unitig_0:2471409-2471419	Cluster_284	11	33	3.235	0	1	+	AUCACCUCCU	17	0.091	N	N2	-1	33	0	0	0	0	0	0
unitig_0:2479535-2479726	Cluster_285	192	23	2.255	0	0.522	0	CCGGGCC	6	0.696	N	N2	-1	18	4	0	0	0	1	0
unitig_0:2496280-2496952	Cluster_286	673	32	3.137	0	0.188	-	UUCCAACCCGUAGAACACGAU	3	0.875	21	N5	-1	6	0	0	12	10	3	1
unitig_0:2503723-2503740	Cluster_287	18	29	2.843	0	0	-	CCUGCAUGGGCCACCA	25	0.138	N	N2	-1	29	0	0	0	0	0	0
unitig_0:2522776-2522958	Cluster_288	183	62	6.078	0	0.903	+	CGCCGAGGGC	30	0.161	N	N2	-1	60	2	0	0	0	0	0
unitig_0:2557564-2557619	Cluster_289	56	31	3.039	0	0.419	0	CCCUCGGCG	11	0.29	N	N2	-1	31	0	0	0	0	0	0
unitig_0:2561785-2561887	Cluster_290	103	85	8.332	0	0.024	-	AGUCCCUUAUCUCCACCA	46	0.106	N	N2	-1	84	1	0	0	0	0	0
unitig_0:2562697-2562791	Cluster_291	95	42	4.117	0	0.905	+	GUGGGCGCCA	29	0.167	N	N2	-1	42	0	0	0	0	0	0
unitig_0:2585168-2585175	Cluster_292	8	46	4.509	0	0	-	GGCGGGCC	45	0.043	N	N2	-1	46	0	0	0	0	0	0
unitig_0:2612443-2612498	Cluster_293	56	122	11.959	0	1	+	CCCGUGG	61	0.066	N	N2	-1	122	0	0	0	0	0	0
unitig_0:2614680-2614997	Cluster_294	318	26	2.549	0	0.885	+	CAUCUCCACCA	20	0.269	N	N2	-1	24	2	0	0	0	0	0
unitig_0:2626404-2626608	Cluster_295	205	44	4.313	0	0.932	+	UAUCCCAGCACUCACACCA	10	0.341	N	N2	-1	38	2	4	0	0	0	0
unitig_0:2639896-2640316	Cluster_296	421	25	2.451	0	0.84	+	GGCGCGGCU	10	0.48	N	N2	-1	19	4	0	0	2	0	0
unitig_0:2640513-2640938	Cluster_297	426	21	2.059	0	0.81	+	GUCUCCGAUUCGACC	2	0.952	N	N2	-1	3	11	0	3	3	1	0
unitig_0:2641877-2642039	Cluster_298	163	42	4.117	0	0.214	0	GGCGGGCC	29	0.286	N	N2	-1	34	4	1	0	0	2	1
unitig_0:2659061-2659353	Cluster_299	293	20	1.961	0	0.6	0	GCCGCGCCG	6	0.65	N	N2	-1	19	0	0	1	0	0	0
unitig_0:2660820-2660838	Cluster_300	19	30	2.941	0	0	-	AUUCCCCGGAUGCCCACCA	30	0.033	N	N2	-1	30	0	0	0	0	0	0
unitig_0:2668729-2669162	Cluster_301	434	28	2.745	0	1	+	GCGUGUGAUCGAAAGG	1	1	N	N2	-1	6	18	0	2	1	0	1
unitig_0:2669254-2670044	Cluster_302	791	67	6.568	0	0.985	+	AGUCAUCUUACCCUGCGCUGAUCUUGCUGUGCAG	2	0.955	N	N2	-1	17	36	2	4	4	2	2
unitig_0:2703556-2703562	Cluster_303	7	55	5.392	0	1	+	CCCGUGG	55	0.018	N	N2	-1	55	0	0	0	0	0	0
unitig_0:2710055-2710160	Cluster_304	106	22	2.157	0	1	+	CUACUGCAUUUUUUCUUACAAG	16	0.273	22	N11	-1	2	2	0	0	16	1	1
unitig_0:2712054-2712087	Cluster_305	34	211	20.684	0	1	+	UUUCCUUAACCUAUAUUGUAG	83	0.114	21	N11	-1	0	9	54	90	35	21	2
unitig_0:2719445-2719585	Cluster_306	141	123	12.058	0	0.992	+	ACCGGUAGACUCAAC	106	0.089	N	N2	-1	121	1	0	0	1	0	0
unitig_0:2733001-2733096	Cluster_307	96	49	4.803	0	0.98	+	CCCGUGG	46	0.082	N	N2	-1	47	2	0	0	0	0	0
unitig_0:2737568-2737755	Cluster_308	188	20	1.961	0	0.95	+	GCGGCCGUCG	5	0.55	N	N2	-1	20	0	0	0	0	0	0
unitig_0:2738993-2739037	Cluster_309	45	160	15.685	0	0.975	+	GGCGGGCC	130	0.081	N	N2	-1	160	0	0	0	0	0	0
unitig_0:2740452-2740458	Cluster_310	7	20	1.961	0	0	-	CCCGUGG	20	0.05	N	N2	-1	20	0	0	0	0	0	0
unitig_0:2744954-2745057	Cluster_311	104	20	1.961	0	0.45	0	GCCGGGGCC	6	0.4	N	N2	-1	19	1	0	0	0	0	0
unitig_0:2750495-2750592	Cluster_312	98	45	4.411	0	0.978	+	CCCGUGG	42	0.089	N	N2	-1	45	0	0	0	0	0	0
unitig_0:2760257-2760309	Cluster_313	53	167	16.371	0	0.994	+	GGCGGGCC	135	0.066	N	N2	-1	167	0	0	0	0	0	0
unitig_0:2790062-2790074	Cluster_314	13	34	3.333	0	1	+	AUCACCUCCU	15	0.118	N	N2	-1	34	0	0	0	0	0	0
unitig_0:2791886-2791943	Cluster_315	58	35	3.431	0	0.971	+	GCCGGGGCC	19	0.143	N	N2	-1	35	0	0	0	0	0	0
unitig_0:2850441-2850461	Cluster_316	21	486	47.642	0	1	+	AAUCCCUCUCUCUCCUCCA	409	0.023	N	N2	-1	467	0	19	0	0	0	0
unitig_0:2856133-2856335	Cluster_317	203	29	2.843	0	0.862	+	AUCACCUCCU	18	0.276	N	N2	-1	26	0	0	2	1	0	0
unitig_0:2879937-2880035	Cluster_318	99	31	3.039	0	0	-	UCGGACCAGGCU	13	0.258	N	N2	-1	17	0	2	11	1	0	0
unitig_0:2890042-2890049	Cluster_319	8	22	2.157	0	0	-	CCCGUGG	21	0.091	N	N2	-1	22	0	0	0	0	0	0
unitig_0:2908176-2908265	Cluster_320	90	25	2.451	0	0.96	+	GCCGCCAGACC	14	0.24	N	N2	-1	25	0	0	0	0	0	0
unitig_0:2913685-2913721	Cluster_321	37	41	4.019	0	0.976	+	CCCGUGG	40	0.049	N	N2	-1	41	0	0	0	0	0	0
unitig_0:2924411-2924536	Cluster_322	126	14450	1416.51	0	1	+	UCCGUUGUCGUCCAGCGGUUAGGAUAUCUGGCU	6594	0.045	N	N2	-1	781	13173	14	18	41	81	342
unitig_0:2969800-2969888	Cluster_323	89	45	4.411	0	1	+	CCCGUGG	44	0.044	N	N2	-1	45	0	0	0	0	0	0
unitig_0:2984473-2984680	Cluster_324	208	43	4.215	0	0.977	+	GCCGGGGC	19	0.256	N	N2	-1	42	1	0	0	0	0	0
unitig_0:3015940-3016276	Cluster_325	337	20	1.961	0	0.5	0	CCGGGCC	6	0.5	N	N2	-1	19	1	0	0	0	0	0
unitig_0:3017009-3017028	Cluster_326	20	43	4.215	0	1	+	CCCGUGG	40	0.093	N	N2	-1	43	0	0	0	0	0	0
unitig_0:3022044-3022063	Cluster_327	20	42	4.117	0	0	-	UUCAAAUCUUCCUGGCACCA	33	0.071	N	N2	-1	9	0	33	0	0	0	0
unitig_0:3035876-3035936	Cluster_328	61	44	4.313	0	0.023	-	CCCGUGG	42	0.068	N	N2	-1	43	0	0	1	0	0	0
unitig_0:3037746-3037790	Cluster_329	45	3495	342.61	0	0	-	UCCGCUUAUCUCCACCA	2973	0.007	N	N2	-1	3490	0	5	0	0	0	0
unitig_0:3049476-3049482	Cluster_330	7	21	2.059	0	0	-	CCCGUGG	21	0.048	N	N2	-1	21	0	0	0	0	0	0
unitig_0:3073875-3073970	Cluster_331	96	73	7.156	0	0	-	GGCGGGCC	51	0.068	N	N2	-1	73	0	0	0	0	0	0
unitig_0:3081274-3081444	Cluster_332	171	40	3.921	0	0.95	+	CCUCAUCUCCACCA	13	0.225	N	N2	-1	39	1	0	0	0	0	0
unitig_0:3094075-3094083	Cluster_333	9	20	1.961	0	0	-	CCCGUGG	18	0.1	N	N2	-1	20	0	0	0	0	0	0
unitig_0:3099691-3099771	Cluster_334	81	26	2.549	0	0.077	-	CCCGUGG	23	0.115	N	N2	-1	26	0	0	0	0	0	0
unitig_0:3125197-3125827	Cluster_335	631	78	7.646	0	0.654	0	AUAAAAUGACCAAAGAUCCUGAAA	2	0.91	N	N2	-1	6	11	1	6	4	7	43
unitig_0:3131236-3132412	Cluster_336	1177	125	12.254	0	0.728	0	CGGGCUGUGGCGC	3	0.912	N	N2	-1	13	16	4	42	45	4	1
unitig_0:3138869-3139104	Cluster_337	236	42	4.117	0	0.857	+	GCCGGGGC	18	0.286	N	N2	-1	39	1	0	1	1	0	0
unitig_0:3145769-3145820	Cluster_338	52	59	5.784	0	1	+	AUCUGAGGCCU	20	0.153	N	N2	-1	59	0	0	0	0	0	0
unitig_0:3172718-3172724	Cluster_339	7	21	2.059	0	1	+	CCCGUGG	20	0.095	N	N2	-1	21	0	0	0	0	0	0
unitig_0:3180281-3180287	Cluster_340	7	26	2.549	0	0	-	CCCGUGG	26	0.038	N	N2	-1	26	0	0	0	0	0	0
unitig_0:3180523-3180551	Cluster_341	29	176	17.253	0	1	+	CUCGGUGGGACCUCCA	169	0.017	N	N2	-1	176	0	0	0	0	0	0
unitig_0:3185903-3185957	Cluster_342	55	30	2.941	0	1	+	UCUUGCAUCCCU	18	0.133	N	N2	-1	30	0	0	0	0	0	0
unitig_0:3196308-3196415	Cluster_343	108	30	2.941	0	1	+	UCCCCAACGGAACCA	10	0.433	N	N2	-1	29	0	0	1	0	0	0
unitig_0:3197094-3197102	Cluster_344	9	64	6.274	0	1	+	CCCGUGG	61	0.047	N	N2	-1	64	0	0	0	0	0	0
unitig_0:3213261-3213267	Cluster_345	7	41	4.019	0	1	+	CCCGUGG	41	0.024	N	N2	-1	41	0	0	0	0	0	0
unitig_0:3220292-3220388	Cluster_346	97	21	2.059	0	0.048	-	UUCCUUGACCACCGAGCAC	5	0.476	N	N2	-1	7	4	6	3	1	0	0
unitig_0:3227233-3227249	Cluster_347	17	49	4.803	0	1	+	CCCAUCUCCACCA	25	0.102	N	N2	-1	49	0	0	0	0	0	0
unitig_0:3233384-3233403	Cluster_348	20	113	11.077	0	0.991	+	CCACAGACGGCGCCA	45	0.08	N	N2	-1	113	0	0	0	0	0	0
unitig_0:3233616-3233632	Cluster_349	17	31	3.039	0	1	+	UCCCACACACGGCGCCA	28	0.097	N	N2	-1	31	0	0	0	0	0	0
unitig_0:3236606-3236697	Cluster_350	92	37	3.627	0	0.27	0	GUCGGGGGUGAAAGCC	13	0.351	N	N2	-1	37	0	0	0	0	0	0
unitig_0:3239068-3239095	Cluster_351	28	43	4.215	0	1	+	CCCGUGG	40	0.07	N	N2	-1	43	0	0	0	0	0	0
unitig_0:3255999-3258417	Cluster_352	2419	218	21.37	0	0.317	0	ACACGGCUCAUGAGCUCACCGAGA	8	0.794	24	N5	1.8	15	21	4	13	9	28	128
unitig_0:3258574-3259600	Cluster_353	1027	54	5.294	0	0.407	0	UCGGCUCUUC	4	0.907	N	N2	-1	7	6	1	5	6	4	25
unitig_0:3260195-3260214	Cluster_354	20	81	7.94	0	1	+	CCCACAGCUGUCACCA	20	0.198	N	N2	-1	77	0	4	0	0	0	0
unitig_0:3285041-3285053	Cluster_355	13	37	3.627	0	0.027	-	GGCGGGCC	32	0.108	N	N2	-1	37	0	0	0	0	0	0
unitig_0:3289494-3289512	Cluster_356	19	61	5.98	0	1	+	CAUCUCCACCA	14	0.164	N	N2	-1	61	0	0	0	0	0	0
unitig_0:3306546-3306555	Cluster_357	10	28	2.745	0	0	-	CCCGUGG	27	0.071	N	N2	-1	28	0	0	0	0	0	0
unitig_0:3322104-3322798	Cluster_358	695	41	4.019	0	0.561	0	AAUGACCGGUUAGACAUAUUUGAC	5	0.829	24	N5	0.5	1	5	0	5	2	7	21
unitig_0:3323126-3324757	Cluster_359	1632	104	10.195	0	0.702	0	ACUUUGUGGACUUGAGACUGAGAA	5	0.856	24	N5	0.3	7	11	8	7	9	13	49
unitig_0:3324871-3325399	Cluster_360	529	46	4.509	0	0.848	+	ACAUGUGGAACAUGAUAUCAGCCU	8	0.717	24	N5	-1	2	1	0	5	6	6	26
unitig_0:3326079-3327688	Cluster_361	1610	80	7.842	0	0.613	0	GUGGCUCGAGCGGC	4	0.875	N	N2	-1	9	10	3	3	4	16	35
unitig_0:3364041-3364053	Cluster_362	13	50	4.901	0	0.98	+	CCCGUGG	48	0.06	N	N2	-1	50	0	0	0	0	0	0
unitig_0:3364718-3364828	Cluster_363	111	37	3.627	0	0.973	+	GCCGGGGC	17	0.135	N	N2	-1	36	1	0	0	0	0	0
unitig_0:3374194-3374314	Cluster_364	121	47	4.607	0	1	+	CGGUGGGACCUCCA	21	0.213	N	N2	-1	47	0	0	0	0	0	0
unitig_0:3382031-3382064	Cluster_365	34	20	1.961	0	0.05	-	CCCGUGG	18	0.15	N	N2	-1	20	0	0	0	0	0	0
unitig_0:3384389-3384591	Cluster_366	203	85	8.332	0	0.318	0	UUUCCCGGCAACCA	28	0.247	N	N2	-1	85	0	0	0	0	0	0
unitig_0:3385930-3385980	Cluster_367	51	61	5.98	0	1	+	CCCGUGG	60	0.033	N	N2	-1	61	0	0	0	0	0	0
unitig_0:3392334-3393376	Cluster_368	1043	68	6.666	0	0.721	0	CUCGGCGUCACGC	18	0.735	N	N2	-1	31	9	2	16	8	2	0
unitig_0:3393939-3394058	Cluster_369	120	119	11.665	0	0.992	+	CCCGUGG	62	0.059	N	N2	-1	119	0	0	0	0	0	0
unitig_0:3394412-3394430	Cluster_370	19	59	5.784	0	0.983	+	GUGGUCGUGCC	55	0.051	N	N2	-1	59	0	0	0	0	0	0
unitig_0:3398239-3398289	Cluster_371	51	23	2.255	0	0.826	+	GCCGGGGC	15	0.217	N	N2	-1	23	0	0	0	0	0	0
unitig_0:3399668-3399899	Cluster_372	232	20	1.961	0	0.85	+	GCCGGGGC	12	0.45	N	N2	-1	20	0	0	0	0	0	0
unitig_0:3404016-3404061	Cluster_373	46	150	14.704	0	1	+	GGCGGGCC	141	0.033	N	N2	-1	150	0	0	0	0	0	0
unitig_0:3409273-3409864	Cluster_374	592	32	3.137	0	0.406	0	UCCGAACCAGUGCCC	8	0.781	N	N2	-1	14	13	1	2	2	0	0
unitig_0:3411439-3411888	Cluster_375	450	25	2.451	0	0.16	-	CGGCGCUUGUGGAUAAGUCAGUGAAC	1	1	N	N2	-1	8	10	2	2	1	1	1
unitig_0:3432329-3432359	Cluster_376	31	39	3.823	0	0.41	0	UGAUUGAGCCGCGCCAAUAUC	22	0.154	N	N2	-1	15	0	0	23	0	1	0
unitig_0:3434361-3434810	Cluster_377	450	23	2.255	0	0.478	0	AUCCUCUCAUCCCUACCA	2	0.913	N	N2	-1	10	9	0	1	1	1	1
unitig_0:3434895-3435061	Cluster_378	167	35	3.431	0	0.314	0	UUCCCCCAACUCCACCA	19	0.371	N	N2	-1	23	3	0	1	0	5	3
unitig_0:3460790-3460873	Cluster_379	84	27	2.647	0	0.963	+	UCCGUAUACCCCUACCA	9	0.37	N	N2	-1	27	0	0	0	0	0	0
unitig_0:3482675-3482775	Cluster_380	101	21	2.059	0	0.19	-	CAGGUCGGACCA	8	0.429	N	N2	-1	20	0	1	0	0	0	0
unitig_0:3483200-3483268	Cluster_381	69	31	3.039	0	0.452	0	CCCGUGG	16	0.161	N	N2	-1	31	0	0	0	0	0	0
unitig_0:3486170-3486425	Cluster_382	256	27	2.647	0	0.926	+	CUUGGCUGACUUUUCCAACUGCAG	8	0.519	N	N2	-1	3	13	0	0	0	2	9
unitig_0:3495244-3495366	Cluster_383	123	26	2.549	0	1	+	GACGGCGCCA	8	0.5	N	N2	-1	26	0	0	0	0	0	0
unitig_0:3496489-3496514	Cluster_384	26	21	2.059	0	1	+	GGCCCAGUAGUUUGAC	10	0.19	N	N2	-1	21	0	0	0	0	0	0
unitig_0:3502698-3502727	Cluster_385	30	147	14.41	0	0	-	UUCCUUGACUCUUGGCUAG	57	0.129	N	N2	-1	58	5	46	10	14	6	8
unitig_0:3505276-3505454	Cluster_386	179	46	4.509	0	0.87	+	UCCGGGCGACGCCACC	9	0.522	N	N2	-1	39	2	5	0	0	0	0
unitig_0:3528084-3528103	Cluster_387	20	64	6.274	0	1	+	CUACCCCCCAUCUCCACCA	33	0.078	N	N2	-1	62	0	2	0	0	0	0
unitig_0:3528229-3528522	Cluster_388	294	64	6.274	0	0.922	+	CCCGGCUGGUGCACC	28	0.203	N	N2	-1	60	2	1	0	1	0	0
unitig_0:3531003-3531088	Cluster_389	86	24	2.353	0	0.083	-	CCCGUGG	19	0.208	N	N2	-1	24	0	0	0	0	0	0
unitig_0:3547151-3547433	Cluster_390	283	49	4.803	0	0.082	-	GGCGGGCC	38	0.204	N	N2	-1	43	1	0	0	5	0	0
unitig_0:3547758-3547893	Cluster_391	136	29	2.843	0	0.897	+	CGUCGCGGCGGCC	7	0.552	N	N2	-1	25	0	0	1	3	0	0
unitig_0:3553411-3553495	Cluster_392	85	36	3.529	0	1	+	CCCGUGG	32	0.139	N	N2	-1	36	0	0	0	0	0	0
unitig_0:3558162-3558178	Cluster_393	17	25	2.451	0	0	-	UCCUACAGAGCGUGCCA	13	0.24	N	N2	-1	25	0	0	0	0	0	0
unitig_0:3576555-3576596	Cluster_394	42	24	2.353	0	1	+	GCCGGGGC	23	0.083	N	N2	-1	24	0	0	0	0	0	0
unitig_0:3586542-3586675	Cluster_395	134	72	7.058	0	0.042	-	UCUCUCAGGCGACGCCA	69	0.056	N	N2	-1	69	0	0	3	0	0	0
unitig_0:3602714-3602769	Cluster_396	56	22	2.157	0	0.955	+	GCCGGGGC	20	0.136	N	N2	-1	22	0	0	0	0	0	0
unitig_0:3619661-3619860	Cluster_397	200	54	5.294	0	0.926	+	CCCGUGG	49	0.093	N	N2	-1	54	0	0	0	0	0	0
unitig_0:3620389-3620399	Cluster_398	11	27	2.647	0	0.444	0	CGCCGAGGGC	11	0.296	N	N2	-1	27	0	0	0	0	0	0
unitig_0:3631334-3631721	Cluster_399	388	22	2.157	0	0.773	0	CGGCGGCG	1	1	N	N2	-1	12	4	1	2	0	3	0
unitig_0:3632716-3632723	Cluster_400	8	36	3.529	0	1	+	CCCGUGG	35	0.056	N	N2	-1	36	0	0	0	0	0	0
unitig_0:3641398-3641453	Cluster_401	56	35	3.431	0	0.8	+	UCUCUUUCAAGGA	27	0.086	N	N2	-1	35	0	0	0	0	0	0
unitig_0:3648293-3648440	Cluster_402	148	34	3.333	0	0.941	+	GCCGGGGCC	15	0.235	N	N2	-1	33	0	0	1	0	0	0
unitig_0:3655158-3655174	Cluster_403	17	74	7.254	0	1	+	CUCGGCCCACCA	39	0.203	N	N2	-1	74	0	0	0	0	0	0
unitig_0:3672102-3672153	Cluster_404	52	32	3.137	0	1	+	CCCGUGG	30	0.094	N	N2	-1	32	0	0	0	0	0	0
unitig_0:3672744-3672779	Cluster_405	36	51	4.999	0	0.98	+	CCCGUGG	49	0.059	N	N2	-1	51	0	0	0	0	0	0
unitig_0:3678894-3679084	Cluster_406	191	36	3.529	0	0	-	CCCGUGG	30	0.167	N	N2	-1	36	0	0	0	0	0	0
unitig_0:3687866-3687916	Cluster_407	51	22	2.157	0	1	+	AGGAUCAUUG	12	0.182	N	N2	-1	22	0	0	0	0	0	0
unitig_0:3688857-3688873	Cluster_408	17	23	2.255	0	0	-	CCCCCUACCCCCGCCA	11	0.174	N	N2	-1	23	0	0	0	0	0	0
unitig_0:3703551-3703602	Cluster_409	52	60	5.882	0	0.983	+	CCCGUGG	48	0.1	N	N2	-1	60	0	0	0	0	0	0
unitig_0:3704171-3704183	Cluster_410	13	73	7.156	0	0	-	GAAUCCCCCCCA	41	0.055	N	N2	-1	73	0	0	0	0	0	0
unitig_0:3721320-3721727	Cluster_411	408	37	3.627	0	0.973	+	UCUGGGCGUCACGC	14	0.595	N	N2	-1	22	7	3	3	1	1	0
unitig_0:3722541-3722840	Cluster_412	300	44	4.313	0	0.477	0	AACCCAAGAUUUGGUCAAACGAUG	2	0.932	N	N2	-1	4	7	1	4	1	9	18
unitig_0:3722961-3723238	Cluster_413	278	60	5.882	0	0.767	0	AUGAGAUGAAAUGACUCUGGUAGU	12	0.667	24	N6	0.9	0	11	0	0	1	3	45
unitig_0:3745256-3745473	Cluster_414	218	28	2.745	0	0.179	-	CCCGUGG	13	0.393	N	N2	-1	27	0	0	1	0	0	0
unitig_0:3798583-3798632	Cluster_415	50	56	5.49	0	0.036	-	GGCGGGCC	41	0.161	N	N2	-1	56	0	0	0	0	0	0
unitig_0:3805665-3805721	Cluster_416	57	33	3.235	0	0.03	-	GGCGGGCC	29	0.152	N	N2	-1	33	0	0	0	0	0	0
unitig_0:3807649-3807697	Cluster_417	49	22	2.157	0	0.045	-	CCCGUGG	21	0.091	N	N2	-1	21	0	0	0	1	0	0
unitig_0:3813923-3814086	Cluster_418	164	43	4.215	0	0.953	+	CCCAGCAGCCACACCA	38	0.14	N	N2	-1	41	0	0	0	0	2	0
unitig_0:3818006-3818094	Cluster_419	89	20	1.961	0	0.95	+	CGGGGGCC	6	0.35	N	N2	-1	20	0	0	0	0	0	0
unitig_0:3827440-3827533	Cluster_420	94	27	2.647	0	0	-	UUCAAAUCCUCAUCCCUACCA	17	0.148	21	N11	-1	4	0	6	17	0	0	0
unitig_0:3839839-3840774	Cluster_421	936	75	7.352	0	0.6	0	GUUGGCCCUCAAUGAUUGAAAGAU	4	0.893	24	N5	0.6	2	8	1	3	3	12	46
unitig_0:3840892-3841167	Cluster_422	276	23	2.255	0	0.696	0	GUCGCCAUCUGAUACCCUCUUUUU	1	1	N	N2	-1	1	7	1	2	1	1	10
unitig_0:3841703-3842028	Cluster_423	326	42	4.117	0	0.548	0	AAGUACUCGAGAGGACCAGAGAAG	6	0.714	24	N5	0.2	0	4	1	1	0	3	33
unitig_0:3842116-3842503	Cluster_424	388	35	3.431	0	0.686	0	AGGGAAAUUGUUAGACUACAUGGU	3	0.886	24	N5	0.2	1	2	2	1	6	3	20
unitig_0:3843865-3844447	Cluster_425	583	32	3.137	0	0.688	0	AUGAGAACUUCCACUUGGCAUUGG	6	0.812	24	N5	0.4	3	1	1	0	3	4	20
unitig_0:3846268-3846593	Cluster_426	326	22	2.157	0	0.545	0	AACCCUGUAGAAGAAUCAAAUGCU	3	0.864	24	N5	0.3	0	4	0	1	1	4	12
unitig_0:3846982-3847483	Cluster_427	502	30	2.941	0	0.633	0	AAAGUAGAAUUGAUCUCAAAAGU	2	0.967	24	N5	0.2	1	5	0	3	1	4	16
unitig_0:3861216-3861227	Cluster_428	12	79	7.744	0	0	-	AACCCCCCCCA	70	0.063	N	N2	-1	79	0	0	0	0	0	0
unitig_0:3865635-3865899	Cluster_429	265	1239	121.457	0	0.01	-	CUCCGAGGACCCUA	104	0.216	N	N2	-1	814	102	50	61	125	70	17
unitig_0:3869479-3869786	Cluster_430	308	28	2.745	0	0.357	0	CCGGGCC	8	0.714	N	N2	-1	13	12	1	1	0	1	0
unitig_0:3877748-3878895	Cluster_431	1148	257	25.193	0	0.595	0	AUCUAAGAAUCUUUGAUCGAGUCU	32	0.685	24	N5	5	10	20	9	10	6	24	178
unitig_0:3885766-3886209	Cluster_432	444	47	4.607	0	0.574	0	AGGGAAAUAUAGUAGUAGAUUUUC	13	0.681	24	N5	0.5	1	3	1	2	0	6	34
unitig_0:3886479-3887543	Cluster_433	1065	80	7.842	0	0.475	0	AUGCUUAGAAUUACUCAAUCCACC	4	0.9	24	N5	0.5	2	11	3	11	4	7	42
unitig_0:3887646-3889204	Cluster_434	1559	281	27.546	0	0.644	0	AGCCCGAUCCUUGUAGAAUAUCUC	18	0.694	24	N5	1.9	12	32	6	15	10	30	176
unitig_0:3889312-3889927	Cluster_435	616	27	2.647	0	0.444	0	CCGGACGGAAAUCUGAAAAUGGGU	1	1	24	N3	0.1	0	3	0	3	2	4	15
unitig_0:3890684-3891066	Cluster_436	383	37	3.627	0	0.784	0	AGAUACUAUCGAGAGUGACUCUGA	4	0.757	24	N5	0.5	2	4	1	1	2	1	26
unitig_0:3903513-3903589	Cluster_437	77	24	2.353	0	0.958	+	GCCGGGGC	21	0.167	N	N2	-1	24	0	0	0	0	0	0
unitig_0:3907284-3907336	Cluster_438	53	30	2.941	0	0.033	-	CGAUAGCCGGCUC	17	0.233	N	N2	-1	30	0	0	0	0	0	0
unitig_0:3912100-3912119	Cluster_439	20	26	2.549	0	0	-	CUCCUGUCCCAAAGAUUUGU	18	0.154	N	N2	-1	8	0	18	0	0	0	0
unitig_0:3926895-3927041	Cluster_440	147	58	5.686	0	0.948	+	CCCGUGG	48	0.172	N	N2	-1	54	1	0	2	1	0	0
unitig_0:3941529-3941553	Cluster_441	25	69	6.764	0	0.986	+	UUUCUCGGAAUGCCCCCC	20	0.246	N	N2	-1	69	0	0	0	0	0	0
unitig_0:3946701-3950236	Cluster_442	3536	1247	122.242	0	0.5	0	AAGGGAAAUAUGAUCCAAAUGCCU	36	0.641	24	N5	7	27	102	18	84	44	116	856
unitig_0:3953549-3953599	Cluster_443	51	23	2.255	0	0.174	-	CCCGUGG	19	0.174	N	N2	-1	20	2	0	0	0	0	1
unitig_0:3958343-3958954	Cluster_444	612	23	2.255	0	0.652	0	UGCACAUCACUUGACUUGUAGGGG	2	0.957	24	N5	0.1	3	1	1	0	3	0	15
unitig_0:3960133-3960572	Cluster_445	440	71	6.96	0	0.845	+	CCCGUGG	37	0.408	N	N2	-1	50	4	0	4	2	2	9
unitig_0:3960692-3961123	Cluster_446	432	42	4.117	0	0.762	0	AUUCCGUAGUCAAGGCCCAUCACU	7	0.786	N	N2	-1	4	6	0	0	2	5	25
unitig_0:3961412-3961730	Cluster_447	319	34	3.333	0	0.206	0	AACAUUCGUACUGUUCCUGGCCUG	7	0.676	N	N2	-1	6	4	1	1	2	5	15
unitig_0:3961861-3962604	Cluster_448	744	45	4.411	0	0.756	0	AAGGCACCUUAGUAUUAUUCUGAA	7	0.733	24	N5	0.2	1	3	0	2	3	2	34
unitig_0:3967533-3967612	Cluster_449	80	162	15.881	0	0.84	+	CGAAUCUUGAUGAUGCUGCAU	87	0.111	21	Y	-1	6	0	6	139	9	1	1
unitig_0:3970301-3970574	Cluster_450	274	27	2.647	0	0.704	0	UAAUCAUGUUUCAGACU	4	0.889	N	N2	-1	5	4	2	2	1	2	11
unitig_0:3973979-3974041	Cluster_451	63	61	5.98	0	0.984	+	CCCGUGG	60	0.033	N	N2	-1	60	1	0	0	0	0	0
unitig_0:3976261-3976529	Cluster_452	269	149	14.606	0	0.993	+	GGCGGGCC	123	0.067	N	N2	-1	147	2	0	0	0	0	0
unitig_0:3985545-3985564	Cluster_453	20	389	38.133	0	1	+	UACCCCCAUCUCCACCA	213	0.044	N	N2	-1	389	0	0	0	0	0	0
unitig_0:3986037-3986148	Cluster_454	112	38	3.725	0	0.237	0	AAUCACAAUUUACACUUAUAGGAU	8	0.711	24	N6	0.3	1	0	1	1	1	8	26
unitig_0:3986435-3988006	Cluster_455	1572	120	11.763	0	0.425	0	AAGACGUAGAGAUGAGAUCCGAGU	3	0.908	N	N2	-1	11	17	3	11	4	12	62
unitig_0:3988102-3988861	Cluster_456	760	69	6.764	0	0.391	0	UACACGCCAUCGGACUAUUGUUGA	9	0.841	24	N5	1.4	2	7	2	8	8	6	36
unitig_0:3989555-3991399	Cluster_457	1845	124	12.156	0	0.508	0	AGGCUAACGGUAGGAUAUGACUAC	4	0.887	24	N5	1.2	7	14	3	5	8	18	69
unitig_0:4002118-4002980	Cluster_458	863	59	5.784	0	0.831	+	AACUAACUCACAAGAUCUAGGUCU	12	0.729	24	N5	-1	1	10	0	2	2	1	43
unitig_0:4008187-4008199	Cluster_459	13	187	18.331	0	1	+	GAACGCCCCCCA	122	0.037	N	N2	-1	187	0	0	0	0	0	0
unitig_0:4010485-4010584	Cluster_460	100	72	7.058	0	0.972	+	CCCGUGG	66	0.083	N	N2	-1	70	2	0	0	0	0	0
unitig_0:4014086-4014097	Cluster_461	12	33	3.235	0	1	+	AUCACCUCCU	26	0.121	N	N2	-1	33	0	0	0	0	0	0
unitig_0:4030752-4030798	Cluster_462	47	267	26.174	0	1	+	CCCACGAGAGAGACAUUUC	66	0.258	N	N2	-1	123	135	1	0	1	0	7
unitig_0:4032007-4032144	Cluster_463	138	64	6.274	0	0.047	-	GGCGGGCC	41	0.188	N	N2	-1	64	0	0	0	0	0	0
unitig_0:4035332-4035350	Cluster_464	19	48	4.705	0	1	+	GAUCCCAGCAUUCACACCA	20	0.125	N	N2	-1	48	0	0	0	0	0	0
unitig_0:4036568-4037463	Cluster_465	896	203	19.9	0	0.493	0	AUACCACUUUGAUCUUUUUGGAGG	12	0.793	24	N5	1.6	6	31	5	15	8	17	121
unitig_0:4040974-4041718	Cluster_466	745	104	10.195	0	0.558	0	AUAGUACAGAUCAGACGCUGGAUU	18	0.654	24	N5	1.2	0	9	0	3	4	9	79
unitig_0:4041803-4043466	Cluster_467	1664	204	19.998	0	0.603	0	CACAUUAGAGCUAAACACCCAGAA	9	0.819	24	N5	0.9	8	22	5	13	8	19	129
unitig_0:4043585-4043782	Cluster_468	198	28	2.745	0	0.179	-	AUCCUUUGUGUUAACUUUGACAUU	18	0.286	24	N11	-1	0	1	0	0	0	0	27
unitig_0:4043914-4044101	Cluster_469	188	27	2.647	0	0.481	0	UCAUUCUACCCUAUUAAGACUCA	2	0.889	24	N6	0.2	1	3	1	2	1	4	15
unitig_0:4060661-4061598	Cluster_470	938	64	6.274	0	0.688	0	AUCGAAUAAGCUCAAUAUGAAGAC	2	0.922	24	N5	0.3	3	4	2	5	2	11	37
unitig_0:4062103-4062511	Cluster_471	409	25	2.451	0	0.48	0	AUCCUAGAAUCUGCCACCCAAGGA	6	0.72	24	N5	0.7	2	1	0	0	1	2	19
unitig_0:4064597-4064996	Cluster_472	400	35	3.431	0	0.714	0	UUAUAGAAAAGUAGAUCCAAGUCU	2	0.971	24	N5	0.3	3	4	1	4	1	4	18
unitig_0:4090096-4090671	Cluster_473	576	33	3.235	0	0.455	0	AAUCACAGACAAAACAUUAUCUCCAA	1	1	24	N3	0.2	1	5	1	1	1	3	21
unitig_0:4101667-4101810	Cluster_474	144	28	2.745	0	0.964	+	AGGAUCAUUG	11	0.286	N	N2	-1	26	0	0	0	0	0	2
unitig_0:4104243-4104318	Cluster_475	76	309	30.291	0	0.006	-	UUUCACUUCGGGUUCACCA	96	0.162	N	N2	-1	201	45	4	5	14	35	5
unitig_0:4118746-4118807	Cluster_476	62	110	10.783	0	0.009	-	UUCCCGGCAAUGAACCA	47	0.109	N	N2	-1	109	1	0	0	0	0	0
unitig_0:4121610-4121805	Cluster_477	196	33	3.235	0	0.424	0	CGCCGAGGGC	12	0.333	N	N2	-1	31	1	0	1	0	0	0
unitig_0:4121957-4122639	Cluster_478	683	24	2.353	0	0.042	-	CGGCGAGGACUGUGAUCCGGGAAGUCACG	1	1	N	N2	-1	7	12	2	1	1	0	1
unitig_0:4125330-4126438	Cluster_479	1109	187	18.331	0	0.652	0	AACACUCGGUCAAACAAUGAAGAU	16	0.706	24	N5	2.7	3	19	0	9	3	20	133
unitig_0:4127743-4127753	Cluster_480	11	25	2.451	0	0	-	CCCGUGG	23	0.12	N	N2	-1	25	0	0	0	0	0	0
unitig_0:4151420-4151823	Cluster_481	404	64	6.274	0	0.391	0	AUGGUAGAGCAGUCGAUGGUUAUC	8	0.828	N	N2	-1	2	12	1	5	2	9	33
unitig_0:4159391-4159482	Cluster_482	92	46	4.509	0	0.913	+	CCCGUGG	41	0.13	N	N2	-1	46	0	0	0	0	0	0
unitig_0:4171099-4171692	Cluster_483	594	43	4.215	0	0.465	0	AGGCACACACUUCUCUGAUAUGGG	5	0.791	24	N5	0.6	3	4	0	5	0	4	27
unitig_0:4172368-4172977	Cluster_484	610	21	2.059	0	0.762	0	ACUUUUAAGUAUACGGCUGUCAGC	7	0.714	24	N5	0.8	1	1	0	2	1	1	15
unitig_0:4175634-4176089	Cluster_485	456	57	5.588	0	0.579	0	GAUUUCUGACAGACGUCGAUCUGU	9	0.737	N	N2	-1	2	11	2	4	4	4	30
unitig_0:4185093-4185111	Cluster_486	19	229	22.449	0	1	+	CCCCACGGUGGGCGCCA	149	0.109	N	N2	-1	229	0	0	0	0	0	0
unitig_0:4185359-4185634	Cluster_487	276	57	5.588	0	0.632	0	AAUUUCUGACAGACGUCGAUCUGU	6	0.667	24	N6	0.2	3	2	0	7	7	8	30
unitig_0:4185882-4186113	Cluster_488	232	162	15.881	0	0.988	+	CACUACUGCUCUGGCCUGGCGUACCCCUCC	11	0.716	N	N2	-1	52	85	5	9	9	1	1
unitig_0:4198400-4202335	Cluster_489	3936	1076	105.479	0	0.393	0	UUUUACCCAGGAUUGAAUUAGAGC	40	0.703	24	N5	10.8	20	102	32	101	74	122	625
unitig_0:4207466-4207472	Cluster_490	7	24	2.353	0	0	-	CCCGUGG	24	0.042	N	N2	-1	24	0	0	0	0	0	0
unitig_0:4208874-4209323	Cluster_491	450	27	2.647	0	0.37	0	AUUUUGAGGAAUAAGAAUUGGCCU	2	0.889	N	N2	-1	3	3	2	0	1	2	16
unitig_0:4209403-4210340	Cluster_492	938	59	5.784	0	0.458	0	AUUCAAGGCAUUUCUUAACUCCCU	3	0.831	24	N5	0.4	1	4	2	9	1	3	39
unitig_0:4210461-4211292	Cluster_493	832	55	5.392	0	0.764	0	ACGGUACCGGAGAUCAUGAACCAA	6	0.818	N	N2	-1	11	5	1	4	1	4	29
unitig_0:4212216-4212396	Cluster_494	181	190	18.625	0	0.884	+	GGCGGGCC	142	0.079	N	N2	-1	190	0	0	0	0	0	0
unitig_0:4213792-4214053	Cluster_495	262	131	12.842	0	0.206	0	AACCGAACUCCAGAACUUAUUACU	51	0.382	24	N6	3.3	4	7	1	1	0	8	110
unitig_0:4214129-4214552	Cluster_496	424	97	9.509	0	0.258	0	ACGAGAAAGACGAACAUGAACUAA	8	0.701	24	N5	0.8	2	13	3	3	1	16	59
unitig_0:4219974-4220057	Cluster_497	84	32	3.137	0	1	+	ACCGGGCUCA	25	0.188	N	N2	-1	32	0	0	0	0	0	0
unitig_0:4220142-4220188	Cluster_498	47	63	6.176	0	1	+	CCCGUGG	44	0.079	N	N2	-1	63	0	0	0	0	0	0
unitig_0:4220265-4220283	Cluster_499	19	72	7.058	0	1	+	CCCGUGG	42	0.111	N	N2	-1	72	0	0	0	0	0	0
unitig_0:4233948-4234518	Cluster_500	571	20	1.961	0	0.45	0	AGCACUCGACUAUCUGCAACAGAA	4	0.85	24	N5	0.1	0	1	0	1	0	2	16
unitig_0:4243171-4243177	Cluster_501	7	29	2.843	0	0	-	CCCGUGG	29	0.034	N	N2	-1	29	0	0	0	0	0	0
unitig_0:4257577-4257587	Cluster_502	11	29	2.843	0	1	+	GAUCACCUCCU	15	0.069	N	N2	-1	29	0	0	0	0	0	0
unitig_0:4262469-4262533	Cluster_503	65	27	2.647	0	0	-	GGGUGCCUCCUCA	10	0.444	N	N2	-1	27	0	0	0	0	0	0
unitig_0:4269317-4269383	Cluster_504	67	32	3.137	0	1	+	CUGGUGCACCA	17	0.125	N	N2	-1	32	0	0	0	0	0	0
unitig_0:4271494-4271516	Cluster_505	23	53	5.196	0	0.981	+	CCCGUGG	50	0.057	N	N2	-1	53	0	0	0	0	0	0
unitig_0:4279974-4280593	Cluster_506	620	43	4.215	0	0	-	AAGGACACUGAAGCUCAAACCAAG	2	0.977	N	N2	-1	13	21	1	2	1	3	2
unitig_0:4284347-4284399	Cluster_507	53	48	4.705	0	0.021	-	CUCACCGCACCA	41	0.167	N	N2	-1	47	0	1	0	0	0	0
unitig_0:4287435-4287726	Cluster_508	292	20	1.961	0	0.4	0	UUUUGUGUAGAUUAGUGCCUAUA	2	0.9	24	N6	0.1	1	3	0	1	1	2	12
unitig_0:4294299-4294632	Cluster_509	334	21	2.059	0	0.762	0	AGAAUCAUAGGGACACGAAAGCUC	3	0.905	N	N2	-1	4	2	0	0	0	3	12
unitig_0:4305904-4306425	Cluster_510	522	21	2.059	0	0.381	0	AGCACAUAGAUCGAGGAUUUUAUC	4	0.762	24	N5	0.1	2	0	0	0	2	0	17
unitig_0:4307112-4307438	Cluster_511	327	33	3.235	0	0.545	0	GUGUCGGGGGU	3	0.939	N	N2	-1	5	9	2	1	2	4	10
unitig_0:4310731-4310737	Cluster_512	7	66	6.47	0	1	+	CCCGUGG	65	0.03	N	N2	-1	66	0	0	0	0	0	0
unitig_0:4311039-4312114	Cluster_513	1076	97	9.509	0	0.567	0	GUCGUUUCCUCAAUAAAUUUUGAA	2	0.938	24	N5	0.8	2	9	5	8	3	15	55
unitig_0:4312772-4313001	Cluster_514	230	20	1.961	0	0.4	0	UUGUGAACUGUCUUGCUGAGAUA	3	0.8	24	N6	0.4	0	1	0	4	0	6	9
unitig_0:4316609-4317121	Cluster_515	513	125	12.254	0	0.4	0	AGGUUCUGUCCUUUUUCGUGGAUU	43	0.464	24	N5	1.8	4	10	0	2	2	9	98
unitig_0:4324707-4325494	Cluster_516	788	420	41.172	0	0.026	-	CAUGGAGGACACGGACCUC	3	0.912	N	N2	-1	58	282	13	18	17	15	17
unitig_0:4335329-4335367	Cluster_517	39	25	2.451	0	0.84	+	GGACUGGGA	13	0.24	N	N2	-1	25	0	0	0	0	0	0
unitig_0:4337921-4337985	Cluster_518	65	45	4.411	0	0	-	GGCGGGCC	41	0.067	N	N2	-1	44	1	0	0	0	0	0
unitig_0:4352612-4353084	Cluster_519	473	22	2.157	0	0.636	0	GGGGGCC	3	0.818	N	N2	-1	7	0	1	1	0	0	13
unitig_0:4354560-4354591	Cluster_520	32	65	6.372	0	0.985	+	CCCGUGG	49	0.077	N	N2	-1	65	0	0	0	0	0	0
unitig_0:4354762-4354810	Cluster_521	49	2534	248.404	0	1	+	CCCUUCCUCUAGCGCCA	833	0.032	N	N2	-1	1898	0	214	415	3	2	2
unitig_0:4359806-4359812	Cluster_522	7	20	1.961	0	0	-	CCCGUGG	20	0.05	N	N2	-1	20	0	0	0	0	0	0
unitig_0:4376883-4376970	Cluster_523	88	39	3.823	0	1	+	GAUGUAGCUUUAGGUG	22	0.179	N	N2	-1	38	0	0	0	0	0	1
unitig_0:4379880-4380274	Cluster_524	395	32	3.137	0	0.781	0	UUGGCACUUGAACUUGUUCUUUCU	8	0.625	24	N5	0.8	0	3	0	1	1	7	20
unitig_0:4380361-4380702	Cluster_525	342	31	3.039	0	0.548	0	UUUUAAGGACAAUUGACAGCAAU	3	0.871	24	N5	0.3	2	3	0	1	1	10	14
unitig_0:4390258-4390571	Cluster_526	314	55	5.392	0	0.4	0	UCCGGCGAUCUUCAACAGUUCUGU	10	0.6	24	N5	0.5	4	3	0	3	4	8	33
unitig_0:4393240-4394306	Cluster_527	1067	138	13.528	0	0.558	0	AAGAGGUGAAAGAGCUCUAGUGGC	6	0.761	24	N5	0.7	2	16	0	9	5	12	94
unitig_0:4394679-4395066	Cluster_528	388	153	14.998	0	0.497	0	UUUCGACGAACUCUGACAGUUUGU	34	0.523	24	N5	1.1	0	12	2	7	6	13	113
unitig_0:4409416-4410284	Cluster_529	869	38	3.725	0	0.447	0	AAAUACGGAAUAAGCCAAUGAGCA	2	0.921	24	N5	0.2	2	4	1	2	1	10	18
unitig_0:4410395-4410543	Cluster_530	149	22	2.157	0	0.364	0	AAGAUUUACCUGACUUGCCUCUGG	2	0.909	24	N6	0.1	0	4	0	2	0	2	14
unitig_0:4411145-4411533	Cluster_531	389	35	3.431	0	0.8	+	UUCGGAAUCGGUGAAAAUUUUAGC	4	0.743	24	N5	-1	0	1	1	6	1	7	19
unitig_0:4434866-4434936	Cluster_532	71	47	4.607	0	0.021	-	CCCUUCCUCUAGCCCCA	17	0.319	N	N2	-1	45	0	2	0	0	0	0
unitig_0:4436509-4437653	Cluster_533	1145	97	9.509	0	0.392	0	AUGGCACUUUGUGACUAAAACCCU	7	0.794	24	N5	1.7	3	10	2	6	1	13	62
unitig_0:4438509-4439048	Cluster_534	540	84	8.234	0	0.464	0	CCCGUGG	15	0.655	N	N2	-1	18	11	0	6	3	6	40
unitig_0:4442580-4443102	Cluster_535	523	136	13.332	0	0.699	0	UAUCCCGUCAGAACUCCUUUUGGC	6	0.765	24	N5	0.4	5	22	2	12	12	26	57
unitig_0:4451689-4451816	Cluster_536	128	21	2.059	0	0.905	+	AAUCGAAACCAGAACCAUACGGAC	9	0.524	24	N11	-1	0	1	0	1	2	2	15
unitig_0:4452437-4452549	Cluster_537	113	25	2.451	0	0.84	+	UAGAGGAUUUCGUAGUACGUAUA	5	0.76	24	N12	-1	0	4	0	1	0	8	12
unitig_0:4452790-4453051	Cluster_538	262	37	3.627	0	0.811	+	GUUCCCGCACUUGUAGAAGUUGUC	3	0.811	N	N2	-1	3	8	0	2	1	4	19
unitig_0:4453240-4453623	Cluster_539	384	29	2.843	0	0.69	0	GCCUUGAUGUUAGUGUAGACCGCC	7	0.724	24	N5	0.3	2	3	1	2	2	1	18
unitig_0:4453907-4454218	Cluster_540	312	30	2.941	0	0.467	0	AACAAUCUUGUAGACAUGCAUAAU	6	0.7	24	N5	0.6	0	2	0	2	2	2	22
unitig_0:4454295-4454543	Cluster_541	249	24	2.353	0	0.458	0	ACCGGAUUUUUCAUUGACUUGUGA	3	0.792	24	N6	0	1	0	0	3	1	1	18
unitig_0:4454780-4455206	Cluster_542	427	82	8.038	0	0.39	0	AUAACAAAGUAGAAUGAAGAGCUU	9	0.756	24	N5	0.3	2	7	2	3	5	11	52
unitig_0:4455491-4456055	Cluster_543	565	94	9.215	0	0.628	0	AACAAUUCUUCAAAUCCUCUUCUC	6	0.787	24	N5	0.4	2	12	2	11	6	13	48
unitig_0:4456135-4456737	Cluster_544	603	62	6.078	0	0.613	0	AAUCCGGAGUAGAACCAGUAGAAC	13	0.774	24	N5	1	4	5	0	1	1	7	44
unitig_0:4458299-4458391	Cluster_545	93	20	1.961	0	1	+	CUUCUAGCGCCA	15	0.15	N	N2	-1	20	0	0	0	0	0	0
unitig_0:4460005-4460021	Cluster_546	17	64	6.274	0	1	+	CCCGUGG	46	0.094	N	N2	-1	64	0	0	0	0	0	0
unitig_0:4460098-4460605	Cluster_547	508	139	13.626	0	0.094	-	AGAUGAAAAGGACUUUGAAAAGAGAGUUA	4	0.806	N	N2	-1	37	68	6	8	7	8	5
unitig_0:4476375-4476383	Cluster_548	9	51	4.999	0	1	+	CCCGUGG	49	0.059	N	N2	-1	51	0	0	0	0	0	0
unitig_0:4478332-4478535	Cluster_549	204	25	2.451	0	0.52	0	UCCAAAAAGAUUACAAUAGUAUG	2	0.88	24	N6	0.6	0	5	0	3	2	3	12
unitig_0:4478612-4479117	Cluster_550	506	62	6.078	0	0.694	0	ACCAACGUGAUCUUUAGUACCAUA	7	0.677	24	N5	0.1	3	6	1	1	2	1	48
unitig_0:4481788-4482176	Cluster_551	389	20	1.961	0	0.55	0	UUCGGAAUCGGUGAAAAUUUUAGC	5	0.75	24	N5	0.5	1	1	1	0	3	3	11
unitig_0:4486124-4486199	Cluster_552	76	53	5.196	0	1	+	CCCGUGG	51	0.057	N	N2	-1	52	0	0	0	0	0	1
unitig_0:4489177-4489272	Cluster_553	96	263	25.782	0	0.989	+	CCCCACGGUGGGCGCCA	130	0.171	N	N2	-1	225	0	3	22	7	1	5
unitig_0:4489537-4490190	Cluster_554	654	29	2.843	0	0.517	0	GACCGAGACAUGUCAGGAGACUGU	4	0.759	N	N2	-1	8	1	1	1	0	3	15
unitig_0:4491119-4492545	Cluster_555	1427	1237	121.261	0	0.999	+	AUUCAGCCCUUUGUCGCUCCGAUUCGAC	48	0.495	N	N2	-1	374	531	54	71	79	70	58
unitig_0:4493838-4493946	Cluster_556	109	21	2.059	0	0.048	-	CCCGUGG	18	0.19	N	N2	-1	21	0	0	0	0	0	0
unitig_0:4494326-4495321	Cluster_557	996	451	44.211	0	0.984	+	GAAGGAUCAUUG	17	0.774	N	N2	-1	179	145	27	31	27	14	28
unitig_0:4495425-4496011	Cluster_558	587	248	24.311	0	0.992	+	UGCCUGUUGGGACCC	5	0.827	N	N2	-1	105	86	14	7	10	12	14
unitig_0:4501303-4501560	Cluster_559	258	40	3.921	0	0.525	0	AUAACCGAGUAUUCAAGAGAACCA	3	0.725	24	N6	0.2	0	5	0	1	3	3	28
unitig_0:4513345-4514383	Cluster_560	1039	256	25.095	0	0.617	0	AAUAUAUCUGGAUAAAGACUCGAU	13	0.684	24	N5	1.2	7	28	6	14	4	35	162
unitig_0:4530951-4531377	Cluster_561	427	21	2.059	0	0.762	0	AUAAACGUAAGCGAUGAACCUUA	2	0.952	24	N5	0.2	2	1	0	3	2	6	7
unitig_0:4532663-4532720	Cluster_562	58	35	3.431	0	0.029	-	CCCGGCAACGGAACCA	29	0.143	N	N2	-1	34	0	0	0	0	0	1
unitig_0:4538767-4538794	Cluster_563	28	78	7.646	0	1	+	CCGAGGACCCUA	41	0.115	N	N2	-1	77	0	0	0	0	0	1
unitig_0:4542761-4542961	Cluster_564	201	25	2.451	0	0.68	0	AUAUGCAGGAUAUAGAUAUCACCU	6	0.72	24	N6	0.3	1	0	0	3	2	5	14
unitig_0:4545756-4546467	Cluster_565	712	23	2.255	0	0.478	0	AUCUCAAAAACAUU	4	0.826	N	N2	-1	5	2	1	0	1	2	12
unitig_0:4567018-4567247	Cluster_566	230	31	3.039	0	0.29	0	AAGGAUAAUCGGCUUCUGAAAGGC	11	0.645	24	N6	0.3	0	3	0	1	1	1	25
unitig_0:4571433-4571495	Cluster_567	63	128	12.548	0	0.961	+	GGCGGGCC	94	0.109	N	N2	-1	128	0	0	0	0	0	0
unitig_0:4579437-4579653	Cluster_568	217	34	3.333	0	0.118	-	CCCGUGG	28	0.176	N	N2	-1	31	0	0	0	2	1	0
unitig_0:4584214-4584395	Cluster_569	182	71	6.96	0	0.986	+	CCCGUGG	65	0.085	N	N2	-1	68	1	0	0	0	0	2
unitig_0:4586469-4587267	Cluster_570	799	32	3.137	0	0.406	0	AGAUGCUAGAGCCCUACCUUGCCU	2	0.969	24	N5	0.4	1	4	1	3	0	1	22
unitig_0:4587393-4588731	Cluster_571	1339	70	6.862	0	0.5	0	ACGAAGAAUUCUUGAAGACUUGAA	7	0.871	24	N5	0.4	0	2	1	6	4	2	55
unitig_0:4593338-4593788	Cluster_572	451	98	9.607	0	0.173	-	UUCACGUCGGGUUCACCA	13	0.52	N	N2	-1	69	4	0	6	3	4	12
unitig_0:4594789-4596734	Cluster_573	1946	151	14.802	0	0.881	+	AUGGACGAGUAUUCAAAGUACACU	13	0.709	24	N5	-1	3	14	5	12	9	9	99
unitig_0:4596827-4597513	Cluster_574	687	57	5.588	0	0.719	0	ACGCAACCGGAAAUAUGACAGCCU	4	0.93	24	N5	0.3	2	4	1	6	3	5	36
unitig_0:4597633-4598622	Cluster_575	990	62	6.078	0	0.726	0	UUCAAGGCUUUGUUGACGCAGACU	4	0.887	N	N2	-1	5	8	2	6	3	1	37
unitig_0:4602283-4604070	Cluster_576	1788	174	17.057	0	0.489	0	CCCGUGG	19	0.747	N	N2	-1	33	18	2	9	9	17	86
unitig_0:4605260-4605392	Cluster_577	133	30	2.941	0	0.2	-	GUGAAAUCCUGUCUGAACA	17	0.367	N	N2	-1	20	1	1	1	1	1	5
unitig_0:4605537-4605826	Cluster_578	290	50	4.901	0	0.1	-	CCCCACGCUGGGCGCCA	17	0.4	N	N2	-1	45	2	0	0	0	0	3
unitig_0:4615780-4616323	Cluster_579	544	21	2.059	0	0.524	0	GAUGAAUGACCUGGAUAGACCUA	2	0.857	24	N5	0.1	0	3	0	1	0	5	12
unitig_0:4619680-4619782	Cluster_580	103	27	2.647	0	0.704	0	AAACCAUCGGAAAACAGAAAAACC	4	0.889	N	N2	-1	2	5	1	0	0	2	17
unitig_0:4619858-4620118	Cluster_581	261	30	2.941	0	0.6	0	UACGGGAAUGGUAGAGCAAUUGAC	2	0.9	24	N6	0.2	4	2	0	2	1	4	17
unitig_0:4623647-4624713	Cluster_582	1067	187	18.331	0	0.636	0	CAACGGAACCA	29	0.578	N	N2	-1	97	67	2	6	2	3	10
unitig_0:4624866-4625144	Cluster_583	279	30	2.941	0	0.933	+	UCGCUGAAUAACUCCUACGGGA	2	0.967	N	N2	-1	3	20	0	3	4	0	0
unitig_0:4627972-4628509	Cluster_584	538	28	2.745	0	0.607	0	ACACCAUCCGCAGAUCCUUAAGGC	4	0.893	N	N2	-1	3	4	0	1	1	6	13
unitig_0:4632402-4633480	Cluster_585	1079	61	5.98	0	0.557	0	AGUGAAGACACGACGAACAUAGCU	2	0.951	N	N2	-1	4	9	2	4	4	9	29
unitig_0:4648550-4649014	Cluster_586	465	63	6.176	0	0.683	0	AAGAUCCAAUCUAGCGCUACUGUU	7	0.73	N	N2	-1	14	5	0	0	0	10	34
unitig_0:4660788-4660961	Cluster_587	174	30	2.941	0	0.067	-	AACAACCAACCUUC	15	0.333	N	N2	-1	29	1	0	0	0	0	0
unitig_0:4667728-4668059	Cluster_588	332	22	2.157	0	0.227	0	AAGACAUUCAAUCUGUAGGAUUAA	2	0.955	24	N5	0.2	2	1	1	2	2	4	10
unitig_0:4669077-4669192	Cluster_589	116	247	24.213	0	0	-	UGCCGUGAUGAGUCUGUUCAGCACCUU	121	0.3	N	N2	-1	17	201	6	4	11	7	1
unitig_0:4669315-4669550	Cluster_590	236	468	45.877	0	0.013	-	UGCAAUGAUGAGUCCAUUCAGUGCCUUGAAAGCACCUCAGUGCUUGA	126	0.246	N	N2	-1	44	374	5	6	7	14	18
unitig_0:4674903-4676299	Cluster_591	1397	150	14.704	0	0.62	0	CUUAUACGAGAAUCUUUGACCGAG	5	0.827	24	N5	1.1	2	27	2	8	11	23	77
unitig_0:4676390-4677499	Cluster_592	1110	95	9.313	0	0.411	0	AAAGAACACACAGAAAAACGAGAA	5	0.8	24	N5	0.3	3	9	2	4	3	10	64
unitig_0:4677619-4678243	Cluster_593	625	65	6.372	0	0.508	0	GGGAAAGUCAAAUCUCGUUGGAUU	3	0.862	24	N5	0.3	1	8	2	6	4	5	39
unitig_0:4678347-4678611	Cluster_594	265	21	2.059	0	0.714	0	AAACACCCACUUCUUGUGAUCGAC	3	0.762	24	N6	0.3	0	2	0	0	1	2	16
unitig_0:4693946-4694770	Cluster_595	825	35	3.431	0	0.514	0	AGAAUCCGCUAGUAACUCGGCUGC	3	0.886	N	N2	-1	5	4	0	3	3	1	19
unitig_0:4696327-4696975	Cluster_596	649	272	26.664	0	0.956	+	CCCCACGGUGGGCGCCA	143	0.206	N	N2	-1	245	2	2	3	3	2	15
unitig_0:4706054-4706076	Cluster_597	23	27	2.647	0	1	+	GUCGGGUUCACCA	11	0.296	N	N2	-1	22	0	0	0	2	3	0
unitig_0:4713520-4713589	Cluster_598	70	22	2.157	0	0.773	0	AAGACCCAAUCUAGCGCUACUGUU	2	0.818	24	N6	-1	0	2	0	4	2	1	13
unitig_0:4713780-4714368	Cluster_599	589	29	2.843	0	0.586	0	AAGUUAGAACCAGUACUUGUUACU	3	0.862	24	N5	0.2	0	4	0	2	2	3	18
unitig_0:4736695-4736882	Cluster_600	188	23	2.255	0	0.652	0	AAUAGAACCUGAAGCAGUCAUACC	3	0.826	N	N2	-1	1	4	0	0	0	1	17
unitig_0:4737000-4737238	Cluster_601	239	30	2.941	0	0.667	0	GAGCCAUAGCCGAUUGUUCUGAU	2	0.9	24	N6	0.5	0	3	0	2	1	6	18
unitig_0:4737335-4737676	Cluster_602	342	21	2.059	0	0.619	0	GUUAUUGUGACCGCUAGGAUGCCU	2	0.905	24	N5	0.1	1	2	0	2	0	4	12
unitig_0:4738217-4738307	Cluster_603	91	84	8.234	0	0.786	0	ACGGAAGGAAGAUAGAUAAAAGAU	44	0.345	24	N6	2.8	0	4	0	1	1	9	69
unitig_0:4738961-4738991	Cluster_604	31	172	16.861	0	0	-	CACGCUCACCGCACCA	44	0.14	N	N2	-1	171	0	1	0	0	0	0
unitig_0:4740715-4741726	Cluster_605	1012	62	6.078	0	0.355	0	GAGUGUAGGAACAUAGUAAUUUA	2	0.935	N	N2	-1	3	12	0	2	2	9	34
unitig_0:4746308-4746852	Cluster_606	545	28	2.745	0	0.571	0	AUCUGACGCCU	9	0.714	N	N2	-1	14	7	0	4	2	1	0
unitig_0:4747174-4747943	Cluster_607	770	75	7.352	0	0.24	0	CCCGUGG	15	0.707	N	N2	-1	22	7	0	6	3	4	33
unitig_0:4748045-4748308	Cluster_608	264	45	4.411	0	0.311	0	AGGAAAACUUGGGCCUGUAGAGAA	3	0.822	24	N6	0.1	3	5	0	3	3	4	27
unitig_0:4748582-4748824	Cluster_609	243	25	2.451	0	0.6	0	UUGAACAUGGAUACCUGUUGGCCU	6	0.8	24	N6	0.3	2	1	1	2	1	2	16
unitig_0:4749152-4751220	Cluster_610	2069	203	19.9	0	0.675	0	AGAGAAUCCUUGGGUUUAGAGCUU	24	0.768	24	N5	2.9	7	17	3	13	13	18	132
unitig_0:4753572-4754184	Cluster_611	613	183	17.939	0	0.421	0	AUCUGACAACGACGGCCGUAUAGC	8	0.754	24	N5	1	12	17	8	11	6	33	96
unitig_0:4762436-4762919	Cluster_612	484	112	10.979	0	0.741	0	AAAGCGAGAUCGUAUAGCAGUUA	19	0.58	24	N5	3.3	10	5	2	7	9	38	41
unitig_0:4763998-4764835	Cluster_613	838	49	4.803	0	0.469	0	GGGGGCC	4	0.898	N	N2	-1	8	4	0	3	1	10	23
unitig_0:4770646-4770807	Cluster_614	162	27	2.647	0	0.593	0	AAGGAUUGAGUCUACUUUGAUAAG	5	0.704	24	N6	1.3	0	2	1	0	1	4	19
unitig_0:4803841-4803922	Cluster_615	82	110	10.783	0	1	+	UUGGGACUUUCGACGUCUGCCUCUCUUGCACUAGAUAUACUGAGUGGCAUA	52	0.136	N	N2	-1	2	108	0	0	0	0	0
unitig_0:4804203-4804541	Cluster_616	339	1089	106.753	0	0.999	+	UGUCUGUGAUGAUAGAUCCAAAGGCUUGUUUCUCAAAACAUUCGCAGUGGC	171	0.211	N	N2	-1	383	614	9	15	6	14	48
unitig_0:4817332-4818334	Cluster_617	1003	83	8.136	0	0.735	0	UCCUGACAGUCUACUGACAUGCCU	5	0.807	24	N5	0.3	2	7	0	2	1	12	59
unitig_0:4833298-4833839	Cluster_618	542	33	3.235	0	0.333	0	GAUGAGUACAAUAUGGAUGAUGAU	3	0.848	N	N2	-1	5	6	1	1	1	1	18
unitig_0:4835559-4835761	Cluster_619	203	24	2.353	0	0.792	0	AGCGAUACCUACAAAUUAGAGGAU	3	0.833	24	N6	0.4	2	0	1	2	2	1	16
unitig_0:4835909-4836334	Cluster_620	426	24	2.353	0	0.583	0	AAAGGAAUAGGUAGAGGCAAACCC	1	1	24	N3	0.2	1	2	1	3	1	2	14
unitig_0:4836453-4836786	Cluster_621	334	24	2.353	0	0.542	0	AGGAGAAUUCUGAACAAGAAAAUG	3	0.875	24	N5	0.2	1	2	1	0	0	2	18
unitig_0:4836864-4837456	Cluster_622	593	48	4.705	0	0.333	0	AAACAUACCUAGAACUGUGGCACG	5	0.708	24	N5	0.3	3	6	2	3	2	3	29
unitig_0:4837602-4837967	Cluster_623	366	28	2.745	0	0.429	0	GAAAAUUUGAAAUUUGAGACGGCC	4	0.786	24	N5	0	0	5	0	1	1	1	20
unitig_0:4839090-4839424	Cluster_624	335	23	2.255	0	0.609	0	AUGGAUAAAUUUCUGACAAUACCU	2	0.957	N	N2	-1	3	3	0	2	2	1	12
unitig_0:4839803-4839884	Cluster_625	82	30	2.941	0	0.033	-	CCCGUGG	29	0.067	N	N2	-1	29	0	0	0	0	1	0
unitig_0:4844058-4844468	Cluster_626	411	22	2.157	0	0.818	+	AAAACCUAAAUGAUGGGCCUUGAC	2	0.955	24	N5	-1	0	3	1	1	0	4	13
unitig_0:4849881-4850445	Cluster_627	565	42	4.117	0	0.548	0	AUAGAACCGGAUAGACUUAGUGCU	5	0.786	24	N5	0.7	0	3	1	1	0	5	32
unitig_0:4856819-4857205	Cluster_628	387	43	4.215	0	0.302	0	AAAAAGAGGACAAGAUGGAGAGAC	4	0.767	N	N2	-1	4	6	0	1	0	6	26
unitig_0:4859101-4859316	Cluster_629	216	89	8.725	0	0.079	-	CUUGAUCACCUCCU	33	0.247	N	N2	-1	81	1	1	2	1	0	3
unitig_0:4859395-4859580	Cluster_630	186	26	2.549	0	0.269	0	AUCAGAAAUCUGACAGAUAUGGCC	7	0.769	24	N6	0.4	1	1	0	1	1	3	19
unitig_0:4860735-4860906	Cluster_631	172	24	2.353	0	0.917	+	AUCACCUCCU	14	0.417	N	N2	-1	17	0	0	1	2	0	4
unitig_0:4861331-4861744	Cluster_632	414	28	2.745	0	0.857	+	UCUCUUCCCCUUCUUCAUUCC	9	0.429	21	N5	-1	2	0	0	20	2	1	3
unitig_0:4862110-4862782	Cluster_633	673	24	2.353	0	0.625	0	ACCGAAGAUCGAUAGAUGGACCCC	3	0.875	N	N2	-1	7	1	0	0	2	0	14
unitig_0:4862903-4863332	Cluster_634	430	23	2.255	0	0.783	0	AUCUCGGUCAGCCGAUAAGUCGGC	2	0.957	N	N2	-1	5	2	0	3	2	2	9
unitig_0:4864442-4865308	Cluster_635	867	48	4.705	0	0.646	0	UCCUGUGA	7	0.75	N	N2	-1	17	3	0	1	3	2	22
unitig_0:4865387-4865558	Cluster_636	172	25	2.451	0	0.28	0	AAGGAUAAUGCCAGACGACAGACC	5	0.72	24	N6	0.1	0	1	1	1	1	4	17
unitig_0:4871199-4871530	Cluster_637	332	65	6.372	0	0.6	0	GUUCCAAUGGUCUUCGUGCUCUCU	16	0.585	N	N2	-1	4	12	1	6	0	4	38
unitig_0:4871616-4872055	Cluster_638	440	64	6.274	0	0.422	0	AUUCGAGAUCGAUCAUAAGAAGUU	10	0.766	24	N5	0.4	0	7	1	2	3	8	43
unitig_0:4875886-4877019	Cluster_639	1134	172	16.861	0	0.494	0	GAUGUGAAUAAGAUCUUUGAAGAU	10	0.831	24	N5	1.3	4	19	8	13	8	21	99
unitig_0:4883706-4884861	Cluster_640	1156	131	12.842	0	0.542	0	AAAAAACAUGCUAGACUCGACUCU	8	0.718	24	N5	1.3	7	15	0	7	6	20	76
unitig_0:4887248-4887619	Cluster_641	372	21	2.059	0	0.762	0	AUUUUAUGCCUUUUUUCUCACACU	1	1	N	N2	-1	3	3	0	4	0	0	11
unitig_0:4894658-4894823	Cluster_642	166	108	10.587	0	0.917	+	CCCGGCAACGGCGCCA	23	0.241	N	N2	-1	98	0	1	1	0	3	5
unitig_0:4903149-4903738	Cluster_643	590	31	3.039	0	0.774	0	AAUUAACUCACAAGAUCUAGGUCU	6	0.774	N	N2	-1	5	2	0	3	3	4	14
unitig_0:4928426-4928783	Cluster_644	358	23	2.255	0	0.783	0	AUUCCAUCGUAGAUCUGUUUUAUU	12	0.435	24	N5	2.4	0	2	0	1	0	0	20
unitig_0:4940144-4940328	Cluster_645	185	32	3.137	0	0.844	+	AACUAACUUACAAGAUCUAGGUCU	17	0.406	24	N11	-1	2	2	0	2	0	1	25
unitig_0:4948708-4949178	Cluster_646	471	40	3.921	0	0.725	0	AACUAACUUACAAGAUCUAGGUCU	18	0.575	24	N5	1	1	5	0	2	1	1	30
unitig_0:4950533-4951326	Cluster_647	794	31	3.039	0	0.645	0	AAGGAUCUGCGGUGAAGCCUUGCU	3	0.903	N	N2	-1	1	8	1	2	1	2	16
unitig_0:4967654-4968044	Cluster_648	391	24	2.353	0	0.542	0	AUCCCUUUGUCUGACGUAUACCGU	2	0.917	24	N5	0.2	1	2	1	1	2	4	13
unitig_0:4969103-4969612	Cluster_649	510	40	3.921	0	0.55	0	AUAGAAUGACUGUACUUAACCAUU	4	0.775	24	N5	0.4	0	6	1	3	1	6	23
unitig_0:4969735-4970466	Cluster_650	732	30	2.941	0	0.433	0	AGUGGAAGUGAAGUAGAAGAGAUU	3	0.9	24	N5	0.2	0	5	1	4	2	2	16
unitig_0:4970788-4971342	Cluster_651	555	20	1.961	0	0.4	0	GCUGACAUGAGU	2	0.95	24	N4	0.5	3	1	0	2	1	1	12
unitig_0:4971659-4972442	Cluster_652	784	31	3.039	0	0.581	0	AUAUGAACCACACAACCAUUAGGU	2	0.968	24	N5	0.1	3	2	1	2	3	2	18
unitig_0:4973041-4974121	Cluster_653	1081	41	4.019	0	0.463	0	AUGGGCAAGAAUGCAUUCUCAGAA	4	0.902	24	N5	0.6	2	2	0	3	4	1	29
unitig_0:4984186-4985391	Cluster_654	1206	84	8.234	0	0.631	0	ACUUUUCAGACUGUACAAAACGGC	3	0.94	N	N2	-1	10	7	4	4	4	8	47
unitig_0:4985556-4985889	Cluster_655	334	30	2.941	0	0.467	0	UAGAUCCCUUAAACCUAGGCACCA	2	0.867	24	N5	0.1	1	2	2	2	1	6	16
unitig_0:4986670-4987482	Cluster_656	813	53	5.196	0	0.623	0	AGGAGAUUAGUAGAAAAUUAGACU	3	0.887	24	N5	0.3	3	7	3	3	3	3	31
unitig_0:4989572-4989646	Cluster_657	75	633	62.052	0	1	+	GGUUCCAUGGUGUAGUGGUUAGCACUCUGGACU	35	0.464	N	N2	-1	82	479	20	15	14	10	13
unitig_0:4997384-4997419	Cluster_658	36	71	6.96	0	1	+	CCCGUGG	70	0.028	N	N2	-1	71	0	0	0	0	0	0
unitig_0:5004409-5004833	Cluster_659	425	26	2.549	0	0.731	0	AUCUAACUCACAAGAUCUAGGUCU	9	0.654	24	N5	0.9	0	3	0	3	1	1	18
unitig_0:5010401-5010859	Cluster_660	459	21	2.059	0	0.619	0	AUCUAUCCUUGCCUUGGCUUUCAC	1	1	N	N2	-1	1	6	0	0	0	3	11
unitig_0:5011338-5011737	Cluster_661	400	29	2.843	0	0.483	0	UUUUCGUCAUUCUUUCUAUUUUGC	2	0.897	24	N5	0.1	1	3	0	4	0	6	15
unitig_0:5024877-5025180	Cluster_662	304	28	2.745	0	0.821	+	GAACUCCCUGAGAUCGAUACUUGU	3	0.893	24	N5	-1	1	2	0	2	0	7	16
unitig_0:5033387-5033762	Cluster_663	376	22	2.157	0	0.545	0	AUCAACCCUAUUUACACCUUAAGACAUCCCU	1	1	N	N2	-1	0	5	0	1	0	4	12
unitig_0:5037310-5037811	Cluster_664	502	69	6.764	0	0.58	0	CAGAAAUCUGACAGAAAUGGCCAU	3	0.826	24	N5	0.2	1	12	2	5	4	8	37
unitig_0:5039041-5039348	Cluster_665	308	42	4.117	0	0.429	0	CCCGUGG	21	0.429	N	N2	-1	40	0	0	0	2	0	0
unitig_0:5041346-5041861	Cluster_666	516	32	3.137	0	0.562	0	ACUCAGAUUAAUACGAGAACGCCU	3	0.875	24	N5	0.3	1	4	1	2	1	4	19
unitig_0:5044823-5045055	Cluster_667	233	25	2.451	0	0.64	0	CGUGCUUUGUACGUGACUUGGAAC	2	0.84	24	N6	0.1	1	3	0	2	1	4	14
unitig_0:5047506-5047922	Cluster_668	417	67	6.568	0	0.313	0	AGAUGAUGAGAGACAACGAAGAGA	14	0.657	24	N5	0.7	3	3	3	5	2	5	46
unitig_0:5051249-5051356	Cluster_669	108	3859	378.292	0	0.001	-	CAGAUCCCACUCUUGACACCA	320	0.067	N	N2	-1	1082	1258	105	627	164	530	93
unitig_0:5053848-5054540	Cluster_670	693	113	11.077	0	0.389	0	AUAACUACUGUGGAAUCCAUUUGU	35	0.531	24	N5	4.1	2	6	4	3	3	9	86
unitig_0:5054620-5054948	Cluster_671	329	53	5.196	0	0.566	0	AAUGCUCCAAGAUAUCGUUUGUCU	5	0.849	24	N5	0.3	0	10	0	5	1	6	31
unitig_0:5055072-5057853	Cluster_672	2782	409	40.094	0	0.526	0	AAGGAUGAAAAUGUCUAGACAACU	23	0.748	24	N5	3.1	17	37	7	26	14	39	269
unitig_0:5067148-5068273	Cluster_673	1126	142	13.92	0	0.746	0	ACGAAUACUUGGAUCUACUCUCCU	8	0.81	24	N5	0.7	5	12	2	8	7	19	89
unitig_0:5084406-5085387	Cluster_674	982	55	5.392	0	0.6	0	AGAAACAACCAAACUCUAGAACUU	10	0.673	24	N5	0.3	1	4	2	6	1	5	36
unitig_0:5086568-5086582	Cluster_675	15	110	10.783	0	0.991	+	GGCGGGCC	104	0.036	N	N2	-1	110	0	0	0	0	0	0
unitig_0:5097308-5097327	Cluster_676	20	34	3.333	0	0	-	CCUGCCUGGGCUCACGC	9	0.382	N	N2	-1	34	0	0	0	0	0	0
unitig_0:5103104-5103111	Cluster_677	8	65	6.372	0	1	+	CCCGUGG	63	0.031	N	N2	-1	65	0	0	0	0	0	0
unitig_0:5110319-5110587	Cluster_678	269	34	3.333	0	0.941	+	ACUGCUCUCCU	16	0.5	N	N2	-1	21	2	0	1	0	2	8
unitig_0:5134177-5134197	Cluster_679	21	22	2.157	0	1	+	CAACGGCCCCA	6	0.636	N	N2	-1	20	0	2	0	0	0	0
unitig_0:5136885-5137057	Cluster_680	173	28	2.745	0	0.893	+	AUUGAUAAGUGAUUUUGUGUCGUU	3	0.857	24	N11	-1	1	4	0	0	1	3	19
unitig_0:5137135-5138013	Cluster_681	879	101	9.901	0	0.792	0	ACGAAGACUUGGAUCUACUCUCCU	13	0.733	N	N2	-1	10	13	3	11	2	7	55
unitig_0:5146314-5147083	Cluster_682	770	55	5.392	0	0.6	0	ACCAACGUGAUCAUUAGUACCAUA	3	0.873	24	N5	0.3	3	3	2	3	3	9	32
unitig_0:5152765-5153514	Cluster_683	750	25	2.451	0	0.72	0	GAGACUCACGAACAACUUUCU	1	1	24	N3	0.1	1	3	0	1	0	3	17
unitig_0:5157330-5157899	Cluster_684	570	27	2.647	0	0.667	0	AGACAAAUUAGACAGAAUGUGCCU	2	0.889	24	N5	0.2	1	1	3	0	1	5	16
unitig_0:5165812-5165822	Cluster_685	11	21	2.059	0	1	+	AUUGCUCUCCU	20	0.095	N	N2	-1	21	0	0	0	0	0	0
unitig_0:5177816-5178060	Cluster_686	245	45	4.411	0	0.511	0	ACCUACAGAAUCGAGGAAUCGGCU	3	0.867	24	N6	0.1	1	6	1	8	4	3	22
unitig_0:5193582-5193958	Cluster_687	377	39	3.823	0	0.718	0	CAACGGCGCCA	10	0.487	N	N2	-1	22	1	1	0	0	3	12
unitig_0:5198517-5198812	Cluster_688	296	22	2.157	0	0.409	0	AACUAACUCACAAGAUCUAGGUCU	6	0.682	24	N6	0.6	1	1	0	1	0	4	15
unitig_0:5222387-5222452	Cluster_689	66	90	8.823	0	0.989	+	CCCGGCAACGGCGCCA	24	0.233	N	N2	-1	82	0	3	0	0	1	4
unitig_0:5228082-5228223	Cluster_690	142	31	3.039	0	1	+	CAUCUCCACCA	27	0.129	N	N2	-1	28	0	0	0	0	0	3
unitig_0:5237947-5238533	Cluster_691	587	37	3.627	0	0.649	0	AAGUCCAUCUUCAAGUAGUUGAGC	2	0.973	N	N2	-1	6	9	0	1	3	2	16
unitig_0:5247173-5247438	Cluster_692	266	115	11.273	0	0.035	-	UUCCCCGGCAACGGCGCCA	23	0.391	N	N2	-1	83	1	12	16	1	2	0
unitig_0:5251842-5251964	Cluster_693	123	24	2.353	0	0.958	+	UGUUGCAUCCCU	8	0.417	N	N2	-1	24	0	0	0	0	0	0
unitig_0:5255247-5255522	Cluster_694	276	22	2.157	0	0.591	0	AAAGUAGCCGCUCUUCUGAAGAGA	3	0.818	24	N6	0.1	0	1	0	1	0	8	12
unitig_0:5272650-5272961	Cluster_695	312	87	8.528	0	0.069	-	CGUAACCUGGCUCUGAUACCA	13	0.437	N	N2	-1	45	1	3	19	8	2	9
unitig_0:5279916-5280155	Cluster_696	240	27	2.647	0	0.074	-	CCCGUGG	22	0.222	N	N2	-1	23	1	0	0	0	0	3
unitig_0:5296869-5297030	Cluster_697	162	47	4.607	0	0.511	0	AUUUUCCGACGAGCUCCGACAGCU	14	0.447	24	N6	1	2	3	0	2	0	1	39
unitig_0:5297123-5297367	Cluster_698	245	55	5.392	0	0.691	0	AAGUGUCGGCUGUUUUCGACGCCU	6	0.709	24	N6	0.4	3	2	0	4	2	8	36
unitig_0:5301324-5301499	Cluster_699	176	51	4.999	0	0.98	+	CCCGUGG	48	0.078	N	N2	-1	48	0	0	0	0	0	3
unitig_0:5301872-5302271	Cluster_700	400	22	2.157	0	0.773	0	ACGAACAGGAACUAAGCUCAUGCU	3	0.818	N	N2	-1	1	4	0	1	0	0	16
unitig_0:5302510-5302702	Cluster_701	193	24	2.353	0	0.375	0	AACUAACUCACAAGAUCUAGGUCU	6	0.583	24	N6	0.6	0	2	0	1	0	0	21
unitig_0:5303979-5304507	Cluster_702	529	28	2.745	0	0.429	0	AAUGAAGACUCGGUCAAAGAUUCU	2	0.964	24	N5	0.2	1	3	1	2	0	2	19
unitig_0:5304588-5305259	Cluster_703	672	61	5.98	0	0.557	0	AGCUGAGGAUCUGCUGUGAAGCCU	3	0.885	24	N5	1.4	5	7	0	5	0	5	39
unitig_0:5324501-5324799	Cluster_704	299	24	2.353	0	0.083	-	CCCGUGG	16	0.333	N	N2	-1	17	0	0	0	0	0	7
unitig_0:5328368-5328808	Cluster_705	441	22	2.157	0	0.955	+	GACUCCGUCAGUAGUGGC	4	0.864	N	N2	-1	7	11	0	0	2	2	0
unitig_0:5329561-5329581	Cluster_706	21	25	2.451	0	1	+	UCCCUCUAUCCCCACC	14	0.28	N	N2	-1	24	0	1	0	0	0	0
unitig_0:5331091-5332195	Cluster_707	1105	290	28.428	0	0.69	0	AAGGCUUCACCGUAGAUCCUCAAC	73	0.493	N	N2	-1	40	25	7	16	9	22	171
unitig_0:5332673-5332685	Cluster_708	13	39	3.823	0	1	+	GCCGGGGC	27	0.103	N	N2	-1	39	0	0	0	0	0	0
unitig_0:5336599-5336607	Cluster_709	9	36	3.529	0	1	+	GCCGGGGCC	18	0.056	N	N2	-1	36	0	0	0	0	0	0
unitig_0:5339196-5339275	Cluster_710	80	25	2.451	0	0.28	0	AUGAAAGGUGACGAGAAAAUGAAA	9	0.48	24	N6	0.5	0	0	0	0	0	4	21
unitig_0:5348959-5349112	Cluster_711	154	7020	688.161	0	0	-	CCAGAGAUUCUGGGUUCGUUCCCCAGCGGAGUCGCCA	762	0.044	N	N2	-1	1285	5268	41	172	35	122	97
unitig_0:5353735-5353977	Cluster_712	243	27	2.647	0	0.037	-	CACAGGGCUCUGCGA	8	0.37	N	N2	-1	23	0	0	1	0	2	1
unitig_0:5355171-5355873	Cluster_713	703	57	5.588	0	0.895	+	AAUACGAAAACUUGGAUCUACUCU	8	0.825	24	N5	-1	1	5	3	2	1	5	40
unitig_0:5363264-5363430	Cluster_714	167	24	2.353	0	0.208	0	UUCAGCCCUUCCUCUAGCGCCA	11	0.375	N	N2	-1	5	0	0	3	14	1	1
unitig_0:5378770-5378778	Cluster_715	9	47	4.607	0	1	+	CCCGUGG	45	0.064	N	N2	-1	47	0	0	0	0	0	0
unitig_0:5380132-5380345	Cluster_716	214	21	2.059	0	0.619	0	AACUAACUCACAAGAUCUAGGUCU	6	0.714	24	N6	0.3	0	2	0	0	0	1	18
unitig_0:5400064-5400895	Cluster_717	832	73	7.156	0	0.685	0	CCCCACGGUGGGCGCCU	9	0.658	N	N2	-1	37	3	0	2	4	0	27
unitig_0:5403301-5403426	Cluster_718	126	58	5.686	0	0.931	+	CCCGUGG	47	0.121	N	N2	-1	56	1	0	1	0	0	0
unitig_0:5410249-5410255	Cluster_719	7	63	6.176	0	1	+	CCCGUGG	63	0.016	N	N2	-1	63	0	0	0	0	0	0
unitig_0:5414122-5414128	Cluster_720	7	45	4.411	0	1	+	CCCGUGG	45	0.022	N	N2	-1	45	0	0	0	0	0	0
unitig_0:5416509-5417142	Cluster_721	634	24	2.353	0	0.625	0	AUAUACUCAAUCUGAAUCAUACCU	2	0.917	24	N5	0.1	1	1	1	1	0	7	13
unitig_0:5424722-5424889	Cluster_722	168	32	3.137	0	0.531	0	GAUUUCUGACAGAUAUCGGUCUGU	2	0.844	24	N6	0.3	1	4	0	2	0	6	19
unitig_0:5430956-5431018	Cluster_723	63	56	5.49	0	0.054	-	AACCGAGCUUCAGAACUUAUUACU	41	0.214	24	N11	-1	0	3	0	0	1	3	49
unitig_0:5432425-5433040	Cluster_724	616	33	3.235	0	0.455	0	AGAAGACUGACACUGGUCAAAGCU	5	0.879	24	N5	0.1	3	3	2	0	2	3	20
unitig_0:5436479-5437006	Cluster_725	528	77	7.548	0	0.429	0	AUUCCUUUCUUGAUUCUAUGAGUG	11	0.662	24	N5	0.4	2	4	2	4	2	7	56
unitig_0:5439915-5439939	Cluster_726	25	43	4.215	0	1	+	AUCACCUCCU	15	0.163	N	N2	-1	43	0	0	0	0	0	0
unitig_0:5443437-5443521	Cluster_727	85	20	1.961	0	0.35	0	GUUCCUGUUCUGAACUUGCAGACU	7	0.45	24	N6	0.2	0	2	0	1	0	0	17
unitig_0:5443599-5444225	Cluster_728	627	24	2.353	0	0.75	0	AGAACCAGUAGAACCGGGUAGACC	8	0.708	N	N2	-1	4	3	3	2	0	0	12
unitig_0:5447010-5447024	Cluster_729	15	28	2.745	0	0	-	GAGCUCAGACUGA	14	0.143	N	N2	-1	28	0	0	0	0	0	0
unitig_0:5456993-5459255	Cluster_730	2263	324	31.761	0	0.552	0	UGUGGUCGCCA	14	0.756	24	N4	2.5	18	27	8	22	20	46	183
unitig_0:5459342-5459717	Cluster_731	376	80	7.842	0	0.625	0	AUCAAGAGGAUGGCGAGACACUCU	7	0.787	24	N5	0.6	3	7	1	5	5	8	51
unitig_0:5459801-5460076	Cluster_732	276	29	2.843	0	0.414	0	AAGAAUACACAAGUGAUAUGGACA	7	0.621	24	N6	0.3	2	2	0	0	0	2	23
unitig_0:5460151-5460845	Cluster_733	695	58	5.686	0	0.552	0	AUGCACAUAAGAUAGAGUUUGACU	2	0.897	24	N5	0.4	2	8	0	5	3	6	34
unitig_0:5460955-5461885	Cluster_734	931	143	14.018	0	0.748	0	AACAAUGAUUGUAGACCAAUACAU	42	0.594	24	N5	3.4	8	12	3	9	3	12	96
unitig_0:5462153-5462524	Cluster_735	372	35	3.431	0	0.686	0	AGAGAUGGAUACGUGUAGAAUUCA	6	0.743	24	N5	0.5	0	4	1	1	0	4	25
unitig_0:5479144-5479183	Cluster_736	40	21	2.059	0	0.952	+	UCCCUCUCUCUCCUCCA	20	0.095	N	N2	-1	21	0	0	0	0	0	0
unitig_0:5480872-5480944	Cluster_737	73	24	2.353	0	0.917	+	CCUAGCAUCCGUACUGUUCUUGAC	16	0.375	24	N11	-1	0	0	1	1	0	1	21
unitig_0:5488865-5489345	Cluster_738	481	30	2.941	0	0.367	0	CCCGUGG	15	0.5	N	N2	-1	22	1	0	0	0	1	6
unitig_0:5504076-5505138	Cluster_739	1063	171	16.763	0	0.713	0	AGUAGAAUUCUUGUGGGGCUCACU	17	0.643	24	N5	2.2	5	16	9	6	4	19	112
unitig_0:5506041-5506756	Cluster_740	716	79	7.744	0	0.506	0	AUAUAUAAAGUAGAGAGCAAGCCU	3	0.911	24	N5	0.5	2	7	4	7	5	6	48
unitig_0:5508389-5509008	Cluster_741	620	146	14.312	0	0.692	0	AAAUGACGGAAAAAUCACGGAACU	14	0.623	24	N5	0.6	4	10	4	10	2	34	82
unitig_0:5511845-5512074	Cluster_742	230	58	5.686	0	0.966	+	GCAGGUCGGACCA	20	0.241	N	N2	-1	58	0	0	0	0	0	0
unitig_0:5527025-5527603	Cluster_743	579	68	6.666	0	0.176	-	AGAACCAGUAGAACCAGUAGAACC	16	0.529	24	N5	-1	8	5	0	2	0	7	46
unitig_0:5549030-5550122	Cluster_744	1093	132	12.94	0	0.614	0	UUUUAUUAUUUCGACGGUUUCUGU	6	0.826	24	N5	0.8	7	15	1	12	5	14	78
unitig_0:5554874-5555396	Cluster_745	523	96	9.411	0	0.323	0	AUACCGCCGCUGUCAGAUCUCUGA	15	0.688	24	N5	2.7	6	8	4	6	2	12	58
unitig_0:5556202-5556831	Cluster_746	630	30	2.941	0	0.433	0	AAGACCAUGAACUUUUAGACA	2	0.967	24	N5	0.3	3	3	2	3	3	2	14
unitig_0:5557293-5557973	Cluster_747	681	30	2.941	0	0.633	0	AUGCCUACAUCGUCGUGAUGAUGA	3	0.9	N	N2	-1	3	4	0	3	2	2	16
unitig_0:5558993-5559441	Cluster_748	449	32	3.137	0	0.625	0	AUACCCGGAUUGGCUUGCGUGAUU	2	0.875	N	N2	-1	3	4	0	2	3	5	15
unitig_0:5559634-5560523	Cluster_749	890	83	8.136	0	0.687	0	ACACCCCAAAGAAUCGUCGAGAGC	7	0.783	24	N5	0.6	3	9	4	7	1	10	49
unitig_0:5560635-5560887	Cluster_750	253	25	2.451	0	0.76	0	AUAGAAGGAGAAGUAUGAGCUUA	2	0.92	24	N6	0.1	3	2	0	1	2	4	13
unitig_0:5564939-5565208	Cluster_751	270	26	2.549	0	0.615	0	UCAAUCGAGCACCGCAUAGCAUA	2	0.885	24	N6	0.3	2	2	1	1	1	7	12
unitig_0:5565301-5565607	Cluster_752	307	22	2.157	0	0.591	0	AGAUAUGUAGGAAUUUUAACUUUC	3	0.909	N	N2	-1	3	3	0	0	1	6	9
unitig_0:5567124-5567618	Cluster_753	495	40	3.921	0	0.55	0	CUAGGAACAGUGUCUAUCAAGAAC	4	0.725	24	N5	0.2	0	4	0	2	1	8	25
unitig_0:5585611-5586199	Cluster_754	589	157	15.39	0	0.535	0	AAGAGAUCUCGAGGGGAUAACGCC	10	0.726	24	N5	0.7	5	22	10	9	7	18	86
unitig_0:5586722-5587016	Cluster_755	295	23	2.255	0	0.478	0	ACCUUUAAGGAGAUUCGUGGAUUUCCU	2	0.957	N	N2	-1	2	3	1	2	1	2	12
unitig_0:5587092-5587407	Cluster_756	316	22	2.157	0	0.818	+	ACCUUGAACCGAACCGGAACUGGU	4	0.818	24	N5	-1	2	1	1	0	1	0	17
unitig_0:5606603-5606621	Cluster_757	19	31	3.039	0	0	-	CCCCACUGUGGGCGCCA	14	0.258	N	N2	-1	31	0	0	0	0	0	0
unitig_0:5609251-5609362	Cluster_758	112	78	7.646	0	0.295	0	GGCGGGCC	52	0.115	N	N2	-1	78	0	0	0	0	0	0
unitig_0:5615086-5615565	Cluster_759	480	34	3.333	0	0.529	0	GAUUACAGACUGAUAGC	1	1	24	N3	0.2	3	3	2	1	1	7	17
unitig_0:5618329-5618398	Cluster_760	70	23	2.255	0	0.087	-	CCCGUGG	21	0.13	N	N2	-1	23	0	0	0	0	0	0
unitig_0:5620389-5620627	Cluster_761	239	26	2.549	0	0.5	0	AACUAACUCACAAGAUCUAGGUCU	9	0.577	24	N6	0.2	0	4	0	0	0	2	20
unitig_0:5625627-5625640	Cluster_762	14	23	2.255	0	1	+	AUCUGACGCCU	19	0.13	N	N2	-1	23	0	0	0	0	0	0
unitig_0:5626525-5626647	Cluster_763	123	21	2.059	0	0.619	0	GCGGGCC	8	0.381	N	N2	-1	14	0	0	0	3	4	0
unitig_0:5629550-5630344	Cluster_764	795	28	2.745	0	0.357	0	AGAUUUGGAGCAGAGAUCUCUGUU	2	0.964	24	N5	0.2	3	2	0	7	0	4	12
unitig_0:5639010-5639692	Cluster_765	683	41	4.019	0	0.732	0	GAUUCCAAUGGUAUUGAGUAGACC	3	0.854	24	N5	0.2	2	6	1	4	1	6	21
unitig_0:5645060-5645838	Cluster_766	779	59	5.784	0	0.746	0	AUAAUCCUAGAACGCUACAAGCUC	4	0.847	24	N5	0.4	3	2	1	5	1	6	41
unitig_0:5647926-5647966	Cluster_767	41	62	6.078	0	1	+	CCCGUGG	60	0.048	N	N2	-1	62	0	0	0	0	0	0
unitig_0:5659068-5659992	Cluster_768	925	43	4.215	0	0.465	0	AUAGUGUUCGAUCUGAUGUAAGAU	4	0.814	24	N5	0.3	2	3	0	3	1	3	31
unitig_0:5660471-5662061	Cluster_769	1591	161	15.783	0	0.478	0	AUUGGACGAGAUUUGAUAGAUUAU	11	0.82	24	N5	1.2	4	16	5	11	8	12	105
unitig_0:5662137-5663727	Cluster_770	1591	140	13.724	0	0.6	0	AGAGAAACACGGACGAGGCUGACG	5	0.893	24	N5	1.4	6	11	2	8	10	12	91
unitig_0:5663908-5665147	Cluster_771	1240	96	9.411	0	0.49	0	CCCUGAGAUCGACACUUAUACUAC	10	0.833	24	N5	0.7	2	15	0	5	1	10	63
unitig_0:5683639-5683789	Cluster_772	151	140	13.724	0	0.879	+	AUGGACCUGGAAUGACUAUACAUA	85	0.293	24	N12	-1	1	12	2	3	2	15	105
unitig_0:5683993-5684170	Cluster_773	178	37	3.627	0	0.541	0	UCUGAAGUUACGAAAUCCACCAAA	4	0.784	N	N2	-1	2	6	1	3	2	7	16
unitig_0:5684248-5684552	Cluster_774	305	42	4.117	0	0.405	0	AAAGGACGUCAUUCUGUUGGAGUA	4	0.857	24	N5	0.2	0	5	1	2	2	9	23
unitig_0:5686402-5686851	Cluster_775	450	29	2.843	0	0.483	0	GUAUAUCUGAGGCACCAUGUAUA	3	0.862	N	N2	-1	2	4	0	1	2	3	17
unitig_0:5687019-5687585	Cluster_776	567	29	2.843	0	0.655	0	AAGGAUGAGAUGUAGAUGAGAAUA	2	0.931	N	N2	-1	4	2	0	2	1	4	16
unitig_0:5688781-5689099	Cluster_777	319	54	5.294	0	0.593	0	AAGAACACAUGGUAUAGAAUUAUC	10	0.667	24	N5	0.7	2	5	0	5	1	13	28
unitig_0:5712092-5712167	Cluster_778	76	21	2.059	0	0.238	0	AUCGACUGAGUCAUAAAAUGAUA	4	0.81	24	N6	0.4	0	2	1	0	0	5	13
unitig_0:5716495-5717041	Cluster_779	547	21	2.059	0	0.429	0	AACAGAGGAUGUCAAGUGUAGUGC	3	0.905	24	N5	0.3	2	1	1	2	1	1	13
unitig_0:5725326-5725563	Cluster_780	238	26	2.549	0	0.5	0	UCGGUUCUGGGUCUCCG	6	0.731	N	N2	-1	7	5	2	1	1	2	8
unitig_0:5732591-5733152	Cluster_781	562	21	2.059	0	0.571	0	AAGCCAUAUUUGCACAAGCAUCAA	1	1	24	N3	0.1	1	2	0	2	3	4	9
unitig_0:5740095-5740120	Cluster_782	26	30	2.941	0	0.8	+	AUCACCUCCU	19	0.1	N	N2	-1	30	0	0	0	0	0	0
unitig_0:5741638-5742047	Cluster_783	410	92	9.019	0	0.446	0	AGAUAUCGGUUACACUCUGCGCCU	16	0.63	24	N5	1.6	3	9	4	5	0	8	63
unitig_0:5743827-5743839	Cluster_784	13	73	7.156	0	1	+	AGUGCUCUCCU	41	0.082	N	N2	-1	73	0	0	0	0	0	0
unitig_0:5749194-5749584	Cluster_785	391	111	10.881	0	0.982	+	CCCGGCAACGGCGCCA	26	0.234	N	N2	-1	102	1	1	0	1	1	5
unitig_0:5754015-5754873	Cluster_786	859	88	8.627	0	0.58	0	AAGGAUCUGCGGUGAAACCUUGCU	3	0.909	24	N5	0.7	5	12	0	12	3	7	49
unitig_0:5762982-5763902	Cluster_787	921	36	3.529	0	0.833	+	GGGGAC	2	0.972	N	N2	-1	8	5	0	1	5	3	14
unitig_0:5764268-5764702	Cluster_788	435	58	5.686	0	0.655	0	GAUUUCUGACAGACGUCGAUCUGU	12	0.69	24	N5	0.9	4	2	3	11	3	5	30
unitig_0:5771999-5772116	Cluster_789	118	30	2.941	0	0.9	+	GAUGGGCUAGGGCCGCC	26	0.167	N	N2	-1	27	0	0	1	0	1	1
unitig_0:5779673-5780182	Cluster_790	510	20	1.961	0	0.65	0	CGUAAAUGAUAUGCUCGUAGACA	3	0.9	24	N5	0.3	1	3	3	2	0	3	8
unitig_0:5787626-5788230	Cluster_791	605	23	2.255	0	0.783	0	GUUCCUGCUAACCAUGCUCUGUUU	2	0.957	N	N2	-1	2	3	0	1	0	7	10
unitig_0:5793037-5793583	Cluster_792	547	34	3.333	0	0.471	0	AUCCGGAUUGAAUUCAUCGAAGAA	3	0.853	24	N5	1	1	5	0	3	1	2	22
unitig_0:5794391-5795281	Cluster_793	891	48	4.705	0	0.333	0	ACCGACUUAGAACACUUGUUUGAG	3	0.938	N	N2	-1	3	7	0	3	1	9	25
unitig_0:5797329-5797855	Cluster_794	527	54	5.294	0	0.259	0	AGAACAAGUAGAACCGAGUAGACU	11	0.704	N	N2	-1	5	10	1	2	1	9	26
unitig_0:5798241-5798317	Cluster_795	77	43	4.215	0	0.93	+	GUUCCUGGCCUGAACCUACAGACU	3	0.814	N	N2	-1	3	8	4	7	1	3	17
unitig_0:5802433-5802862	Cluster_796	430	101	9.901	0	0.436	0	AAACACCCGGAAAUGACUCAGAUC	12	0.554	24	N5	1	6	9	0	3	2	10	71
unitig_0:5804814-5805249	Cluster_797	436	25	2.451	0	0.64	0	UAACAUGUUGUAAAUCAGGAGCCU	2	0.96	24	N5	0.1	1	3	1	4	0	2	14
unitig_0:5818313-5818331	Cluster_798	19	33	3.235	0	1	+	GUGCGACCUCCA	13	0.212	N	N2	-1	33	0	0	0	0	0	0
unitig_0:5819219-5819516	Cluster_799	298	27	2.647	0	0.926	+	AUUGAGAACCUAUGCAUAAACCCU	13	0.481	24	N11	-1	1	1	0	0	0	4	21
unitig_0:5821149-5821529	Cluster_800	381	75	7.352	0	0.227	0	CCCUGAGAUCGAUAUUCGUACUAC	15	0.613	N	N2	-1	2	16	1	1	4	10	41
unitig_0:5821869-5822152	Cluster_801	284	28	2.745	0	0.643	0	CAGAAACUAAAGUGUGACCAGUGU	2	0.893	24	N6	0.1	2	1	2	2	2	2	17
unitig_0:5826005-5826592	Cluster_802	588	42	4.117	0	0.452	0	AACGGAGUCCUCUGAAAGGUAUUC	6	0.857	N	N2	-1	3	7	1	2	1	3	25
unitig_0:5826941-5828319	Cluster_803	1379	65	6.372	0	0.631	0	UUCGAGAUCUUGCUACUGACA	2	0.923	24	N5	0.2	2	9	1	8	1	8	36
unitig_0:5843270-5843281	Cluster_804	12	20	1.961	0	1	+	CAUCUCCACCA	18	0.15	N	N2	-1	20	0	0	0	0	0	0
unitig_0:5847216-5847744	Cluster_805	529	21	2.059	0	0.571	0	UUGUUCUCUAUAGUUUGCAU	1	1	24	N3	0.3	3	0	2	3	1	3	9
unitig_0:5849138-5849673	Cluster_806	536	73	7.156	0	0.808	+	AAAAACCCAGAAUCUGAGAACACC	5	0.795	24	N5	-1	1	11	2	6	5	8	40
unitig_0:5860643-5860726	Cluster_807	84	30	2.941	0	0.4	0	AACAUGUGUCACGAUCUAUACUCG	5	0.7	24	N6	0.7	2	2	1	3	2	6	14
unitig_0:5862862-5864040	Cluster_808	1179	166	16.273	0	0.464	0	ACGAAAACUUGGAUCUACUCUCCU	8	0.771	24	N5	1.6	3	23	4	8	6	18	104
unitig_0:5865700-5865718	Cluster_809	19	38	3.725	0	1	+	UCCCUCUCUCUCCUCCA	23	0.158	N	N2	-1	38	0	0	0	0	0	0
unitig_0:5872355-5872452	Cluster_810	98	78	7.646	0	0.013	-	AUCCCCGGCAACGGCGCCA	16	0.269	N	N2	-1	64	0	6	7	0	0	1
unitig_0:5878167-5878471	Cluster_811	305	21	2.059	0	0.667	0	GAAGACUGACACUGGUCAAGGCCC	2	0.952	N	N2	-1	2	4	0	0	0	2	13
unitig_0:5878977-5879366	Cluster_812	390	37	3.627	0	0.784	0	AAAACCGUGACAUUUUGUAGAAGU	8	0.676	24	N5	0.3	2	2	2	1	0	9	21
unitig_0:5887330-5887344	Cluster_813	15	25	2.451	0	1	+	AAGUCCUCAUCCCU	18	0.16	N	N2	-1	25	0	0	0	0	0	0
unitig_0:5891347-5891383	Cluster_814	37	35	3.431	0	1	+	CCCGUGG	33	0.086	N	N2	-1	35	0	0	0	0	0	0
unitig_0:5892474-5892755	Cluster_815	282	23	2.255	0	0.435	0	AUACAUAAAAUAAAACGAAUCUGA	1	1	N	N2	-1	2	4	1	1	0	3	12
unitig_0:5923626-5923698	Cluster_816	73	157	15.39	0	0.994	+	AAUCCUGUCAUCCCUACCA	56	0.076	N	N2	-1	157	0	0	0	0	0	0
unitig_0:5925514-5926635	Cluster_817	1122	157	15.39	0	0.904	+	CCCGGCAACGGAACCA	60	0.471	N	N2	-1	84	8	2	3	3	9	48
unitig_0:5932288-5932295	Cluster_818	8	38	3.725	0	1	+	CCCGUGG	37	0.053	N	N2	-1	38	0	0	0	0	0	0
unitig_0:5937784-5937933	Cluster_819	150	22	2.157	0	0.682	0	UACGAGAUGUGAAGUGUAGAGAUU	4	0.818	N	N2	-1	0	5	0	1	0	4	12
unitig_0:5939008-5939015	Cluster_820	8	24	2.353	0	0	-	CCCGUGG	23	0.083	N	N2	-1	24	0	0	0	0	0	0
unitig_0:5939701-5940765	Cluster_821	1065	83	8.136	0	0.627	0	CAACGGCGCCA	9	0.843	N	N2	-1	17	9	5	6	2	9	35
unitig_0:5943238-5944087	Cluster_822	850	81	7.94	0	0.58	0	UUGGACCUCCA	8	0.79	24	N4	0.3	11	4	1	2	4	10	49
unitig_0:5944422-5944504	Cluster_823	83	42	4.117	0	0.929	+	CCCGUGG	39	0.071	N	N2	-1	42	0	0	0	0	0	0
unitig_0:5959409-5959447	Cluster_824	39	38	3.725	0	1	+	UCGGCUCUCACC	18	0.158	N	N2	-1	38	0	0	0	0	0	0
unitig_0:5963906-5964191	Cluster_825	286	23	2.255	0	0.043	-	AAUAGAGGAACGCUGAACAGCAGC	12	0.478	24	N11	-1	2	2	0	3	0	1	15
unitig_0:5964739-5965190	Cluster_826	452	22	2.157	0	0.5	0	AAUGUUAUACGGACCCCAAACAUC	1	1	24	N3	0.8	2	1	0	1	2	4	12
unitig_0:5965891-5966547	Cluster_827	657	33	3.235	0	0.545	0	GAGAAAAAUGUAGUAGCCCGAGAU	2	0.97	24	N5	0.3	4	1	0	4	2	5	17
unitig_0:5967332-5967419	Cluster_828	88	26	2.549	0	0.577	0	AACAUGUUUCGGACUAAACCUACA	7	0.654	24	N6	0.1	0	3	3	0	0	5	15
unitig_0:5968043-5968279	Cluster_829	237	22	2.157	0	0.909	+	ACGUAUAUUACAUCGGAAUGCACC	5	0.727	N	N2	-1	1	4	0	0	2	2	13
unitig_0:5968945-5969343	Cluster_830	399	21	2.059	0	0.381	0	AUGGAUUUGUGGUGCAUAUGUAUC	2	0.905	24	N5	0.1	0	2	0	2	0	4	13
unitig_0:5980239-5980973	Cluster_831	735	29	2.843	0	0.586	0	UAGGAAAAUUGCUACUUACUCUUC	2	0.897	N	N2	-1	1	5	0	1	0	3	19
unitig_0:5981054-5981662	Cluster_832	609	100	9.803	0	0.51	0	ACGAGCACAUGUUUGACUUUGAUA	4	0.82	24	N5	0.5	2	11	3	7	4	14	59
unitig_0:5981991-5982330	Cluster_833	340	79	7.744	0	0.747	0	AACAUGUCACUUAUCGCUUAGGAG	8	0.608	24	N5	0.3	0	6	0	3	0	8	62
unitig_0:5982430-5982684	Cluster_834	255	26	2.549	0	0.423	0	UAAACACAUCAUUUGACAAGA	2	0.962	24	N6	0.1	1	3	1	2	0	3	16
unitig_0:5982762-5983095	Cluster_835	334	33	3.235	0	0.242	0	AUUCCAUAAACUGUAGCUAUUAGA	5	0.788	24	N5	0.1	0	6	0	1	4	1	21
unitig_0:5983215-5983817	Cluster_836	603	57	5.588	0	0.684	0	AACGGAACCA	9	0.667	N	N2	-1	13	2	1	2	2	4	33
unitig_0:5994204-5994317	Cluster_837	114	80	7.842	0	0.912	+	AAUGGAUGUUGUUGGAGAUUUGGA	9	0.55	24	N11	-1	2	5	1	5	1	10	56
unitig_0:5995508-5995529	Cluster_838	22	537	52.641	0	1	+	CACGCUCACCGCACCA	148	0.058	N	N2	-1	529	0	1	4	3	0	0
unitig_0:5999060-5999087	Cluster_839	28	2837	278.107	0	0	-	UUCGUUUCACGUCGGGUUCACCA	1089	0.037	23	N12	-1	274	23	26	933	360	1113	108
unitig_0:6008920-6009059	Cluster_840	140	20	1.961	0	0.9	+	GCUUUGAUCCAGGG	11	0.5	N	N2	-1	13	1	0	1	0	1	4
unitig_0:6034225-6034612	Cluster_841	388	22	2.157	0	0.545	0	AUUUUUCUCUACUAGCACCUGAGA	1	1	N	N2	-1	2	6	0	2	0	2	10
unitig_0:6050588-6050605	Cluster_842	18	45	4.411	0	1	+	GAUGGGCUAGGGCCGCC	28	0.156	N	N2	-1	45	0	0	0	0	0	0
unitig_0:6051936-6051985	Cluster_843	50	32	3.137	0	0.719	0	UUAGAAAUUCUGAUCGUAGUAUC	6	0.656	24	N6	-1	0	4	3	1	0	10	14
unitig_0:6053483-6054108	Cluster_844	626	441	43.231	0	0.966	+	CAAUUCCCGUCGUUCGCCCCA	55	0.345	N	N2	-1	164	109	41	64	15	27	21
unitig_0:6054233-6054600	Cluster_845	368	753	73.816	0	0.036	-	GGGCUAUUAGCUCAGUGGUAGAGCGCGCCCCU	211	0.376	N	N2	-1	210	485	9	15	13	8	13
unitig_0:6055115-6055783	Cluster_846	669	27	2.647	0	0.63	0	GAAAAAGUGAUUCGAUUGAUGGGACC	3	0.815	N	N2	-1	13	10	0	1	2	1	0
unitig_0:6056614-6057167	Cluster_847	554	75	7.352	0	0.12	-	AGCCCUACUAAGCCUACCA	6	0.733	N	N2	-1	21	31	3	3	6	7	4
unitig_0:6057349-6057622	Cluster_848	274	100	9.803	0	0.32	0	AUACUUGGAGUGUUGUAGGAGACU	16	0.62	24	N6	0.3	1	13	2	6	0	17	61
unitig_0:6060604-6060891	Cluster_849	288	71	6.96	0	0.859	+	AGGACCAGGAGCAGUAGAUCUGUC	35	0.423	24	N11	-1	3	4	1	4	1	2	56
unitig_0:6061292-6061615	Cluster_850	324	34	3.333	0	0.765	0	AGGUUAUUUGAAGUUGUGAGUGUA	2	0.882	24	N5	0.2	0	2	0	2	1	6	23
unitig_0:6065012-6065057	Cluster_851	46	30	2.941	0	0	-	CACGAAGCCCCCGGUUGU	29	0.067	N	N2	-1	30	0	0	0	0	0	0
unitig_0:6065819-6065825	Cluster_852	7	62	6.078	0	1	+	CCCGUGG	62	0.016	N	N2	-1	62	0	0	0	0	0	0
unitig_0:6081062-6081385	Cluster_853	324	21	2.059	0	0.429	0	AUAUGCGAGAUGUGUAGAACUAGG	2	0.857	24	N5	0.1	0	3	0	1	0	2	15
unitig_0:6083333-6083350	Cluster_854	18	157	15.39	0	0	-	UUUCCCGGCAAUGAACCA	131	0.051	N	N2	-1	157	0	0	0	0	0	0
unitig_0:6090690-6092197	Cluster_855	1508	205	20.096	0	0.605	0	AUUCCUCGACAAGAAUCUCUUUGU	16	0.78	24	N5	1.1	2	16	8	16	10	32	121
unitig_0:6092356-6093281	Cluster_856	926	209	20.488	0	0.574	0	UAUCUCAACUAGGUUUUUCACUGU	14	0.66	24	N5	1.2	7	15	3	8	11	20	145
unitig_0:6102455-6102467	Cluster_857	13	57	5.588	0	1	+	CACGUUCCCG	30	0.14	N	N2	-1	57	0	0	0	0	0	0
unitig_0:6124484-6124662	Cluster_858	179	20	1.961	0	0.1	-	AAUGGGCGGGAGAACAAUCUUUAU	9	0.6	24	N11	-1	0	2	0	3	0	1	14
unitig_0:6147131-6148189	Cluster_859	1059	81	7.94	0	0.543	0	AUACCACUUUGAUCUUUUUGGAGG	7	0.815	24	N5	0.4	7	4	1	5	3	7	54
unitig_0:6148265-6148563	Cluster_860	299	25	2.451	0	0.44	0	AGGAGAUUGUCAUGGAGUGUUACA	7	0.64	24	N6	1.5	0	2	0	1	0	4	18
unitig_0:6156317-6156867	Cluster_861	551	46	4.509	0	0.761	0	CCGAGACAUGUCAGGAGACUGUU	6	0.739	N	N2	-1	3	8	0	3	1	11	20
unitig_0:6156944-6157285	Cluster_862	342	22	2.157	0	0.455	0	AGUACGAGUAUCGAUCACAGGGAG	2	0.909	24	N5	1	2	1	1	3	2	2	11
unitig_0:6184666-6185288	Cluster_863	623	24	2.353	0	0.5	0	AAGACACAACGAAUAUAGCUGGACA	1	1	24	N3	0.2	1	3	0	3	1	3	13
unitig_0:6195905-6196153	Cluster_864	249	20	1.961	0	0.85	+	CGCGGCGGCG	7	0.7	N	N2	-1	14	6	0	0	0	0	0
unitig_0:6201638-6202812	Cluster_865	1175	82	8.038	0	0.537	0	GCCGGGGC	17	0.744	N	N2	-1	29	3	4	14	23	7	2
unitig_0:6204999-6205347	Cluster_866	349	20	1.961	0	0.55	0	AUUAGGAUGAACAAUGGCACCAAA	1	1	24	N3	0.5	3	0	1	2	1	2	11
unitig_0:6205689-6206617	Cluster_867	929	55	5.392	0	0.509	0	AACGAAUAAUUCUGAGAACCUCCU	4	0.891	24	N5	0.6	4	7	0	3	5	3	33
unitig_0:6208233-6208731	Cluster_868	499	44	4.313	0	0.182	-	CCCGUGG	17	0.591	N	N2	-1	18	2	1	4	0	1	18
unitig_0:6208866-6208992	Cluster_869	127	22	2.157	0	0.545	0	GAUUGCACUCUGCACUAGUAGCCU	5	0.636	24	N6	0.4	1	2	0	0	2	0	17
unitig_0:6210017-6210557	Cluster_870	541	25	2.451	0	0.48	0	AGGCACCUCAUCGUUGGCAUCAUG	4	0.84	N	N2	-1	2	5	0	0	0	1	17
unitig_0:6211787-6211892	Cluster_871	106	20	1.961	0	1	+	CGGUAGACUUGAA	10	0.4	N	N2	-1	20	0	0	0	0	0	0
unitig_0:6212417-6212430	Cluster_872	14	48	4.705	0	0	-	GGCGGGCC	36	0.062	N	N2	-1	48	0	0	0	0	0	0
unitig_0:6248850-6249964	Cluster_873	1115	49	4.803	0	0.408	0	UCGUACUGACAUCCACCUUGGCUC	3	0.857	24	N5	0.2	2	1	1	4	3	5	33
unitig_0:6253409-6254007	Cluster_874	599	50	4.901	0	0.22	0	AAGGACCCAGAACCGAUAAAGAAC	12	0.64	24	N5	0.4	4	4	1	2	0	6	33
unitig_0:6254082-6254429	Cluster_875	348	22	2.157	0	0.545	0	UUGAAAUGAGAGUUGGACGGCACC	3	0.909	24	N5	0.1	1	3	0	1	1	5	11
unitig_0:6254671-6255170	Cluster_876	500	27	2.647	0	0.519	0	ACCCAAAACCGACCCAGAACCAAC	2	0.926	N	N2	-1	5	1	1	0	1	2	17
unitig_0:6258622-6258892	Cluster_877	271	83	8.136	0	0.94	+	CCUAGGGCUCCA	69	0.133	N	N2	-1	77	0	0	0	1	0	5
unitig_0:6260873-6262171	Cluster_878	1299	140	13.724	0	0.686	0	UUUUAUUAUUUCGACGGUUUCUGU	10	0.779	N	N2	-1	11	18	2	12	2	18	77
unitig_0:6273732-6274331	Cluster_879	600	47	4.607	0	0.787	0	AGUACUAGAACUUGAUUCAACCCU	5	0.809	24	N5	0.2	1	4	1	4	1	5	31
unitig_0:6274428-6275158	Cluster_880	731	74	7.254	0	0.608	0	AUAUGAAGGUAUGAAUAAAGGCAC	5	0.838	24	N5	0.8	4	4	0	5	3	12	46
unitig_0:6276001-6276245	Cluster_881	245	28	2.745	0	0.357	0	UAGUCUACGUAAAACCCUAAGCCU	5	0.857	24	N6	0.4	0	1	0	1	1	3	22
unitig_0:6278968-6279041	Cluster_882	74	57	5.588	0	0.982	+	CCCGUGG	55	0.053	N	N2	-1	56	1	0	0	0	0	0
unitig_0:6284662-6284988	Cluster_883	327	32	3.137	0	0.531	0	AUUAUUCUCCAACUCACAACGUGU	3	0.844	24	N5	0.2	0	5	2	0	1	0	24
unitig_0:6285087-6287152	Cluster_884	2066	290	28.428	0	0.638	0	AAGUUCCCACAAACUCUAGAAACC	5	0.783	24	N5	1	13	31	7	14	14	31	180
unitig_0:6287749-6287793	Cluster_885	45	26	2.549	0	1	+	CAGCAUCACCCAUGCCUACAG	8	0.231	N	N2	-1	15	0	3	8	0	0	0
unitig_0:6301026-6301148	Cluster_886	123	28	2.745	0	0.929	+	AGGAUCAUUG	14	0.25	N	N2	-1	28	0	0	0	0	0	0
unitig_0:6312571-6313253	Cluster_887	683	43	4.215	0	0.674	0	AAAUACACUUCAUUAUCUUCCUGG	2	0.977	24	N5	0.4	2	5	2	4	1	7	22
unitig_0:6318539-6319233	Cluster_888	695	44	4.313	0	0.705	0	AUAAUCCUAGAACGCCACAAGCUC	2	0.909	24	N5	0.2	4	3	2	2	1	7	25
unitig_0:6320832-6320976	Cluster_889	145	131	12.842	0	0.023	-	ACCCGGGCUCACACACCA	101	0.053	N	N2	-1	131	0	0	0	0	0	0
unitig_0:6333567-6333574	Cluster_890	8	30	2.941	0	1	+	CCCGUGG	29	0.067	N	N2	-1	30	0	0	0	0	0	0
unitig_0:6339106-6339114	Cluster_891	9	79	7.744	0	1	+	CCCGUGG	69	0.038	N	N2	-1	79	0	0	0	0	0	0
unitig_0:6347786-6347807	Cluster_892	22	35	3.431	0	0.029	-	CCACCACGUUCCCUUGG	7	0.457	N	N2	-1	33	0	2	0	0	0	0
unitig_0:6353661-6353962	Cluster_893	302	75	7.352	0	0.027	-	CUCACCGCACCA	28	0.347	N	N2	-1	66	3	0	0	3	1	2
unitig_0:6355173-6355739	Cluster_894	567	26	2.549	0	0.5	0	AGUAGAAACUCUAUGUAAUGGCCU	3	0.846	24	N5	0.4	2	2	0	0	1	5	16
unitig_0:6356363-6356980	Cluster_895	618	39	3.823	0	0.59	0	CAACAUAGGUCAUCG	3	0.846	N	N2	-1	9	6	0	8	1	1	14
unitig_0:6357104-6357393	Cluster_896	290	332	32.545	0	0.009	-	UUUCACUACUGCUUUGGCCUGGCGCGCCCCUC	22	0.572	N	N2	-1	36	217	11	30	25	4	9
unitig_0:6358006-6358147	Cluster_897	142	44	4.313	0	0.955	+	CCCGUGG	39	0.114	N	N2	-1	44	0	0	0	0	0	0
unitig_0:6363158-6363178	Cluster_898	21	23	2.255	0	0	-	CCCGUGG	20	0.174	N	N2	-1	23	0	0	0	0	0	0
unitig_0:6366440-6366901	Cluster_899	462	33	3.235	0	0.576	0	CCGGGCC	12	0.667	N	N2	-1	19	4	0	6	3	0	1
unitig_0:6367011-6367286	Cluster_900	276	36	3.529	0	0.278	0	CUGGUCCGGCCGGGCC	5	0.611	N	N2	-1	28	0	0	6	2	0	0
unitig_0:6378933-6379012	Cluster_901	80	26	2.549	0	0	-	CCCGUGG	24	0.115	N	N2	-1	26	0	0	0	0	0	0
unitig_0:6379269-6379279	Cluster_902	11	103	10.097	0	1	+	GUUCCCGUGG	51	0.049	N	N2	-1	103	0	0	0	0	0	0
unitig_0:6390111-6390124	Cluster_903	14	32	3.137	0	0	-	UAGACUUGAAC	16	0.156	N	N2	-1	32	0	0	0	0	0	0
unitig_0:6394456-6395103	Cluster_904	648	23	2.255	0	0.304	0	CCGUGGAACACUCUGAGGA	2	0.957	N	N2	-1	13	5	2	0	3	0	0
unitig_0:6395236-6395396	Cluster_905	161	21	2.059	0	0.762	0	GCGGGCC	10	0.381	N	N2	-1	20	1	0	0	0	0	0
unitig_0:6434786-6435270	Cluster_906	485	58	5.686	0	0.207	0	GCGGGCC	6	0.897	N	N2	-1	23	23	2	3	3	4	0
unitig_0:6441970-6442045	Cluster_907	76	48	4.705	0	0.021	-	CUCCAUUCGACC	31	0.167	N	N2	-1	48	0	0	0	0	0	0
unitig_0:6443062-6443071	Cluster_908	10	42	4.117	0	0.976	+	CCCGUGG	41	0.048	N	N2	-1	42	0	0	0	0	0	0
unitig_0:6459835-6460284	Cluster_909	450	108	10.587	0	0.481	0	CGGAAAGAACAUCUAAAAGACAGA	3	0.833	24	N5	1.8	6	12	7	9	8	16	50
unitig_0:6460507-6461132	Cluster_910	626	149	14.606	0	0.765	0	AUCUUUUUUGGAGCCUGAACACCC	24	0.49	24	N5	2.7	3	11	3	11	21	23	77
unitig_0:6461586-6461746	Cluster_911	161	38	3.725	0	0.316	0	CGGAACCGAGAAUCAAGAACCGAA	2	0.816	24	N6	0.2	1	2	3	8	0	6	18
unitig_0:6461904-6462032	Cluster_912	129	51	4.999	0	0.961	+	CCCGUGG	45	0.098	N	N2	-1	51	0	0	0	0	0	0
unitig_0:6465776-6465855	Cluster_913	80	51	4.999	0	1	+	CCCGUGG	50	0.039	N	N2	-1	51	0	0	0	0	0	0
unitig_0:6470843-6470923	Cluster_914	81	21	2.059	0	0.048	-	CCCGUGG	18	0.19	N	N2	-1	20	0	0	0	0	1	0
unitig_0:6471592-6472028	Cluster_915	437	32	3.137	0	0.688	0	GAGAUUACUAGAACCUAUGUGGGU	3	0.875	24	N5	0.1	0	5	1	3	3	3	17
unitig_0:6472111-6472456	Cluster_916	346	39	3.823	0	0.462	0	AUUACCCUAGGCCGAGGACUUACU	5	0.769	24	N5	0.3	2	1	3	9	3	5	16
unitig_0:6472586-6473072	Cluster_917	487	94	9.215	0	0.394	0	AACGGUCUUCGUGCUCUCAGAGAC	10	0.681	24	N5	0.7	4	11	3	3	3	8	62
unitig_0:6473250-6475512	Cluster_918	2263	420	41.172	0	0.552	0	AGAGAUAUUUGUGGUAUGAACACC	31	0.771	24	N5	4.5	12	46	13	29	16	52	252
unitig_0:6475690-6476124	Cluster_919	435	64	6.274	0	0.391	0	UCAUAUUAUCAUUUUUCCUCCUCU	3	0.875	N	N2	-1	4	9	2	6	1	9	33
unitig_0:6476283-6477162	Cluster_920	880	123	12.058	0	0.488	0	CCAUUUUCCAGUCAGCUCUGAUA	3	0.886	24	N5	1	10	13	3	13	5	18	61
unitig_0:6488284-6488451	Cluster_921	168	20	1.961	0	1	+	GGACUGGGA	13	0.35	N	N2	-1	15	4	0	0	0	0	1
unitig_0:6488670-6488676	Cluster_922	7	41	4.019	0	1	+	CCCGUGG	41	0.024	N	N2	-1	41	0	0	0	0	0	0
unitig_0:6518667-6518673	Cluster_923	7	23	2.255	0	0	-	CCCGUGG	23	0.043	N	N2	-1	23	0	0	0	0	0	0
unitig_0:6520783-6520794	Cluster_924	12	36	3.529	0	0.028	-	GCCGGUCCGCC	26	0.167	N	N2	-1	36	0	0	0	0	0	0
unitig_0:6526104-6526300	Cluster_925	197	9995	979.796	0	0	-	UUGGACUGAAGGGAGCUCCCU	5855	0.023	21	Y	-1	224	26	319	7984	1335	77	30
unitig_0:6529630-6529648	Cluster_926	19	20	1.961	0	0	-	UUUCCCGGCUGGGUCACCA	17	0.15	N	N2	-1	20	0	0	0	0	0	0
unitig_0:6532897-6533328	Cluster_927	432	105	10.293	0	0.924	+	CACGUUCCCG	48	0.181	N	N2	-1	93	0	1	0	1	3	7
unitig_0:6533408-6534642	Cluster_928	1235	56	5.49	0	0.482	0	AGGACUAGAGGAUGCCACGUGGGA	3	0.929	N	N2	-1	10	3	2	10	5	3	23
unitig_0:6534722-6535887	Cluster_929	1166	76	7.45	0	0.395	0	AGGCAACUGAAAGACCAUGAGAGG	4	0.868	24	N5	0.3	5	6	3	8	2	7	45
unitig_0:6536149-6537500	Cluster_930	1352	167	16.371	0	0.737	0	GCUCCCACUUUGGUCGCCA	17	0.593	N	N2	-1	88	3	3	13	5	6	49
unitig_0:6557188-6557403	Cluster_931	216	1261	123.614	0	1	+	CGCGGCCCCUGCC	344	0.254	N	N2	-1	875	261	24	18	26	40	17
unitig_0:6558279-6558927	Cluster_932	649	76	7.45	0	0.447	0	AUAGGGUCUUCGAUUAUUGUUACC	6	0.829	24	N5	0.6	3	10	2	8	3	10	40
unitig_0:6559113-6561167	Cluster_933	2055	523	51.269	0	0.461	0	AUCGAAAACUCACUCAAAACACCU	20	0.702	24	N5	5.1	20	43	13	57	27	66	297
unitig_0:6567747-6568223	Cluster_934	477	34	3.333	0	0.441	0	AGGAUACAAGGUUCAUCUGGAAUU	5	0.647	24	N5	0.2	3	0	0	2	3	2	24
unitig_0:6568348-6569679	Cluster_935	1332	134	13.136	0	0.515	0	AUGUCUUGGAUUGAGCAAUAGCCU	6	0.806	24	N5	1.3	7	15	2	18	12	9	71
unitig_0:6569749-6570508	Cluster_936	760	58	5.686	0	0.603	0	UAUGAUCUCAAUACAAAGCCU	3	0.931	N	N2	-1	6	7	4	8	4	4	25
unitig_0:6570577-6570815	Cluster_937	239	26	2.549	0	0.731	0	GACCGGAUACCUGUUCAACUUAGG	3	0.846	N	N2	-1	1	6	0	2	1	1	15
unitig_0:6571435-6571743	Cluster_938	309	24	2.353	0	0.833	+	AUUGCAAACUCUAACAGGCCUUGG	3	0.792	24	N5	-1	1	2	0	1	3	2	15
unitig_0:6580972-6581789	Cluster_939	818	73	7.156	0	0.562	0	AGGGACGGUACUAUAACGGUCACC	3	0.904	N	N2	-1	4	11	1	6	4	3	44
unitig_0:6581873-6582170	Cluster_940	298	55	5.392	0	0.491	0	UUGGGAUAAAAAGAAUGCAAAACU	3	0.909	24	N6	0.4	2	4	0	3	2	15	29
unitig_0:6593864-6594477	Cluster_941	614	44	4.313	0	0.636	0	AACCUACAAUAUUAGUCAUGCUGU	3	0.909	N	N2	-1	5	6	1	2	0	7	23
unitig_0:6601815-6601980	Cluster_942	166	33	3.235	0	0.879	+	GUCAAAGCCCGGAA	28	0.182	N	N2	-1	30	1	0	0	0	0	2
unitig_0:6604194-6604344	Cluster_943	151	34	3.333	0	0.971	+	CUACGCCAGGAU	14	0.324	N	N2	-1	34	0	0	0	0	0	0
unitig_0:6608831-6609844	Cluster_944	1014	304	29.801	0	0.895	+	GGCGGGCC	125	0.188	N	N2	-1	270	13	1	11	7	1	1
unitig_0:6618555-6619064	Cluster_945	510	184	18.037	0	0.478	0	ACAGACGACGGUUAUUUGAAAAGU	15	0.668	24	N5	1.4	3	18	4	8	3	24	124
unitig_0:6619841-6619890	Cluster_946	50	21	2.059	0	0.857	+	GCCGGGGC	17	0.238	N	N2	-1	20	0	0	0	0	1	0
unitig_0:6631398-6631462	Cluster_947	65	32	3.137	0	0.75	0	CGCGGCCCCUG	12	0.344	N	N2	-1	32	0	0	0	0	0	0
unitig_0:6642274-6642285	Cluster_948	12	24	2.353	0	1	+	GAUCACCUCCU	13	0.125	N	N2	-1	24	0	0	0	0	0	0
unitig_0:6643157-6643529	Cluster_949	373	30	2.941	0	0.967	+	GGACGCGGCGGC	6	0.7	N	N2	-1	27	2	0	0	0	1	0
unitig_0:6653397-6653473	Cluster_950	77	31	3.039	0	0.032	-	AUUUGGAGGCAUGAAAACAU	9	0.194	N	N2	-1	22	0	9	0	0	0	0
unitig_0:6664401-6664489	Cluster_951	89	52	5.097	0	0.981	+	CCCGUGG	49	0.077	N	N2	-1	52	0	0	0	0	0	0
unitig_0:6668398-6668404	Cluster_952	7	61	5.98	0	1	+	CCCGUGG	61	0.016	N	N2	-1	61	0	0	0	0	0	0
unitig_0:6671689-6671701	Cluster_953	13	21	2.059	0	0.952	+	CGGCCCCUGCC	12	0.286	N	N2	-1	21	0	0	0	0	0	0
unitig_0:6689147-6689240	Cluster_954	94	34	3.333	0	1	+	GAAGGAUCAUUG	14	0.176	N	N2	-1	32	0	1	0	0	1	0
unitig_0:6691292-6691400	Cluster_955	109	53	5.196	0	0.981	+	CCCGUGG	47	0.132	N	N2	-1	52	1	0	0	0	0	0
unitig_0:6708339-6708509	Cluster_956	171	1009	98.911	0	1	+	AGCAAUGAAGACAGAAUUCUAAUCCCAGCUCGAUGAGACCU	219	0.183	N	N2	-1	124	755	17	13	19	28	53
unitig_0:6708686-6708824	Cluster_957	139	325	31.859	0	0.997	+	UUUUGAUUAUGGCCUCGAACAAAUCUCCACAAGU	44	0.332	N	N2	-1	18	263	9	10	20	5	0
unitig_0:6751246-6751345	Cluster_958	100	20	1.961	0	0	-	UUCCCCUGACGGCGCCA	10	0.3	N	N2	-1	15	0	5	0	0	0	0
unitig_0:6769554-6769634	Cluster_959	81	20	1.961	0	0.9	+	CCGGGCC	14	0.3	N	N2	-1	20	0	0	0	0	0	0
unitig_0:6785302-6785485	Cluster_960	184	331	32.447	0	0	-	UGUGGAAACUCGAUAGGGUUGGCUCGUUGGCCGACCCUCC	25	0.417	N	N2	-1	33	232	13	10	30	5	8
unitig_0:6786505-6786631	Cluster_961	127	28	2.745	0	1	+	AGGGCUCUGCGAAGUC	18	0.321	N	N2	-1	26	1	0	0	1	0	0
unitig_0:6787361-6787393	Cluster_962	33	27	2.647	0	0.111	-	CCCGUGG	24	0.148	N	N2	-1	27	0	0	0	0	0	0
unitig_0:6787755-6787861	Cluster_963	107	20	1.961	0	1	+	GCCGGGGC	17	0.2	N	N2	-1	19	0	0	0	0	0	1
unitig_0:6797766-6799682	Cluster_964	1917	106	10.391	0	0.396	0	UACGAAGAUGGACAAAGGGACU	2	0.972	N	N2	-1	18	14	2	25	39	7	1
unitig_0:6834617-6834659	Cluster_965	43	57	5.588	0	0.035	-	GGCGGGCC	47	0.14	N	N2	-1	57	0	0	0	0	0	0
unitig_0:6846951-6846968	Cluster_966	18	692	67.836	0	0.003	-	UCUGGUUCCUGGCACCA	685	0.006	N	N2	-1	692	0	0	0	0	0	0
unitig_0:6851723-6851891	Cluster_967	169	51	4.999	0	1	+	CCCGUGG	47	0.098	N	N2	-1	50	0	1	0	0	0	0
unitig_0:6858548-6858563	Cluster_968	16	24	2.353	0	0.042	-	AAAACUGAGCCCC	14	0.208	N	N2	-1	24	0	0	0	0	0	0
unitig_0:6866735-6866745	Cluster_969	11	28	2.745	0	0	-	GUGGUCGUGCC	28	0.036	N	N2	-1	28	0	0	0	0	0	0
unitig_0:6872716-6872783	Cluster_970	68	67	6.568	0	1	+	CCCGUGG	65	0.045	N	N2	-1	67	0	0	0	0	0	0
unitig_0:6897047-6897196	Cluster_971	150	25	2.451	0	0.04	-	GUUUAGGUAGCUCAGC	6	0.4	N	N2	-1	22	1	0	0	1	1	0
unitig_0:6903776-6906083	Cluster_972	2308	252	24.703	0	0.571	0	AGUUUUCUUUCGGAGUAUAAGCCU	13	0.806	24	N5	1.8	5	24	4	12	18	25	164
unitig_0:6938230-6938241	Cluster_973	12	67	6.568	0	1	+	CCCGUGG	52	0.075	N	N2	-1	67	0	0	0	0	0	0
unitig_0:6941703-6941783	Cluster_974	81	69	6.764	0	0.986	+	UUCCCCCUCAACUCCACCA	60	0.072	N	N2	-1	67	1	1	0	0	0	0
unitig_0:6950061-6950201	Cluster_975	141	43	4.215	0	0.581	0	AUUUUUGUAGCUGAAAAACCU	8	0.628	24	N6	0.5	0	3	1	12	0	6	21
unitig_0:6950276-6950356	Cluster_976	81	456	44.701	0	0.002	-	UUCGUUUCACGUCGGGUUCACCA	177	0.143	23	N12	-1	64	3	2	5	8	333	41
unitig_0:6951446-6952052	Cluster_977	607	39	3.823	0	0.744	0	AGAAAACACCUGUAGAAUCUGUGC	4	0.897	24	N5	0.1	0	1	0	3	4	4	27
unitig_0:6952227-6952952	Cluster_978	726	36	3.529	0	0.806	+	UCGGAGAGAACACCUGCAAGAGAG	3	0.861	N	N2	-1	3	6	1	3	2	3	18
unitig_0:6953030-6954132	Cluster_979	1103	39	3.823	0	0.615	0	UUUGAACUAACUGACCUUGGAC	2	0.974	24	N5	0.3	3	3	4	2	4	4	19
unitig_0:6955082-6955235	Cluster_980	154	27	2.647	0	0.63	0	AUUUUUGUAGCUGAAAAACCU	3	0.815	24	N6	0.2	1	4	2	5	0	1	14
unitig_0:6955548-6955795	Cluster_981	248	20	1.961	0	0.2	-	GUAGGGCCCUCCA	10	0.5	N	N2	-1	19	0	0	1	0	0	0
unitig_0:6956307-6957468	Cluster_982	1162	188	18.429	0	0.676	0	UUUUACUAUUUCGACGGUUUAUGU	8	0.787	24	N5	1	3	25	3	15	5	27	110
unitig_0:6982817-6983382	Cluster_983	566	20	1.961	0	0.65	0	CGAUUCGACC	3	0.85	N	N2	-1	12	4	1	2	1	0	0
unitig_0:6990727-6990756	Cluster_984	30	37	3.627	0	1	+	UUCCUUGACAGUGGAGUUCAG	29	0.135	21	N11	-1	0	2	0	29	5	1	0
unitig_0:7000712-7000975	Cluster_985	264	54	5.294	0	0.926	+	CCCGUGG	46	0.148	N	N2	-1	54	0	0	0	0	0	0
unitig_0:7015028-7015098	Cluster_986	71	21	2.059	0	0.619	0	AACGGAACCA	8	0.238	N	N2	-1	20	1	0	0	0	0	0
unitig_0:7015255-7015305	Cluster_987	51	127	12.45	0	0.969	+	GGCGGGCC	112	0.071	N	N2	-1	126	0	0	0	0	0	1
unitig_0:7022139-7022177	Cluster_988	39	20	1.961	0	0.05	-	CCCGUGG	19	0.1	N	N2	-1	19	0	0	1	0	0	0
unitig_0:7040560-7040675	Cluster_989	116	38	3.725	0	0.158	-	UAUAGCCCUACCA	27	0.158	N	N2	-1	38	0	0	0	0	0	0
unitig_0:7045498-7045740	Cluster_990	243	1587	155.571	0	0.001	-	UUCAUUGUCUGUUCGACCU	430	0.08	N	N2	-1	586	40	85	651	146	50	29
unitig_0:7048476-7049312	Cluster_991	837	90	8.823	0	0.667	0	AAUACGGAAAUAAAGGAUGACACU	9	0.767	24	N5	0.3	5	4	5	5	2	10	59
unitig_0:7049441-7049851	Cluster_992	411	58	5.686	0	0.621	0	AUUCCAGGAACUUCUAGAAAUCGA	4	0.828	24	N5	0.3	1	7	3	4	5	7	31
unitig_0:7050054-7050660	Cluster_993	607	70	6.862	0	0.686	0	ACGAAAAUGUUCGGUAGAAAUAGC	5	0.843	24	N5	0.2	2	9	1	6	7	6	39
unitig_0:7050743-7053447	Cluster_994	2705	255	24.997	0	0.51	0	AAAUUCCACUAGAUCUUGCACUGA	6	0.82	24	N5	1.2	13	17	9	15	17	31	153
unitig_0:7087191-7087197	Cluster_995	7	51	4.999	0	1	+	CCCGUGG	50	0.039	N	N2	-1	51	0	0	0	0	0	0
unitig_0:7116657-7116734	Cluster_996	78	44	4.313	0	1	+	ACCGGGCUCA	24	0.205	N	N2	-1	44	0	0	0	0	0	0
unitig_0:7130953-7130960	Cluster_997	8	60	5.882	0	1	+	CCCGUGG	58	0.05	N	N2	-1	60	0	0	0	0	0	0
unitig_0:7138550-7138661	Cluster_998	112	46	4.509	0	1	+	GAUUGGCUGUGAGAUC	3	0.891	N	N2	-1	16	17	3	2	1	4	3
unitig_0:7161690-7162124	Cluster_999	435	22	2.157	0	0.364	0	GCCGGGGC	4	0.727	N	N2	-1	18	3	0	1	0	0	0
unitig_0:7166524-7166568	Cluster_1000	45	33	3.235	0	1	+	GAUCACCUCCU	12	0.242	N	N2	-1	33	0	0	0	0	0	0
unitig_0:7174808-7174817	Cluster_1001	10	32	3.137	0	1	+	GCCGGGGCC	16	0.094	N	N2	-1	32	0	0	0	0	0	0
unitig_0:7179865-7179948	Cluster_1002	84	47	4.607	0	0.043	-	GGCGGGCC	38	0.106	N	N2	-1	47	0	0	0	0	0	0
unitig_0:7181940-7181963	Cluster_1003	24	22	2.157	0	0.091	-	CCCGUGG	20	0.091	N	N2	-1	22	0	0	0	0	0	0
unitig_0:7199550-7199583	Cluster_1004	34	138	13.528	0	0	-	UUCCUUGACUACAUGCUGAAAG	55	0.159	22	N11	-1	0	17	0	1	56	50	14
unitig_0:7201357-7201363	Cluster_1005	7	59	5.784	0	1	+	CCCGUGG	59	0.017	N	N2	-1	59	0	0	0	0	0	0
unitig_0:7225600-7227026	Cluster_1006	1427	164	16.077	0	0.89	+	CUAGAGGUCGAGAGCU	2	0.957	N	N2	-1	42	84	7	6	11	5	9
unitig_0:7231206-7231335	Cluster_1007	130	63	6.176	0	0.333	0	GGCGGGCC	38	0.19	N	N2	-1	63	0	0	0	0	0	0
unitig_0:7255249-7255262	Cluster_1008	14	22	2.157	0	0.955	+	GCCGGGGC	20	0.136	N	N2	-1	22	0	0	0	0	0	0
unitig_0:7290352-7290370	Cluster_1009	19	134	13.136	0	0.985	+	GGCGGGCC	117	0.067	N	N2	-1	134	0	0	0	0	0	0
unitig_0:7300670-7300798	Cluster_1010	129	455	44.603	0	0.029	-	GGCAGGUCGGACCA	221	0.053	N	N2	-1	455	0	0	0	0	0	0
unitig_0:7312639-7313056	Cluster_1011	418	27	2.647	0	0.407	0	GCCGCGCC	7	0.593	N	N2	-1	22	4	0	0	1	0	0
unitig_0:7317904-7318094	Cluster_1012	191	47	4.607	0	1	+	CCCGUGG	43	0.085	N	N2	-1	44	0	0	2	0	0	1
unitig_0:7319471-7319558	Cluster_1013	88	55	5.392	0	0.945	+	CCCGUGG	51	0.091	N	N2	-1	54	1	0	0	0	0	0
unitig_0:7321527-7321757	Cluster_1014	231	152	14.9	0	0.987	+	GGCGGGCC	126	0.105	N	N2	-1	145	4	1	1	0	1	0
unitig_0:7355628-7356136	Cluster_1015	509	131	12.842	0	0.702	0	AUCUGACCGAAUUCUGAAUUCUGU	35	0.588	24	N5	2.9	1	12	1	8	2	10	97
unitig_0:7361007-7361014	Cluster_1016	8	52	5.097	0	1	+	CCCGUGG	51	0.038	N	N2	-1	52	0	0	0	0	0	0
unitig_0:7371328-7371362	Cluster_1017	35	63	6.176	0	0.984	+	CCCGUGG	60	0.063	N	N2	-1	63	0	0	0	0	0	0
unitig_0:7375838-7375951	Cluster_1018	114	61	5.98	0	0.033	-	CCCGGGCUCACACACCA	56	0.098	N	N2	-1	59	1	0	0	1	0	0
unitig_0:7380725-7380827	Cluster_1019	103	50	4.901	0	0.96	+	CCCGUGG	47	0.06	N	N2	-1	50	0	0	0	0	0	0
unitig_0:7384288-7384310	Cluster_1020	23	219	21.468	0	0.991	+	CGCACCGGGCGGGCCGC	190	0.041	N	N2	-1	219	0	0	0	0	0	0
unitig_0:7388361-7388717	Cluster_1021	357	30	2.941	0	0.6	0	UGGGCUAGGGCCGCC	8	0.667	N	N2	-1	16	1	0	4	7	2	0
unitig_0:7394786-7394800	Cluster_1022	15	21	2.059	0	0.667	0	CGCCCCGGCCGGAUC	14	0.095	N	N2	-1	21	0	0	0	0	0	0
unitig_0:7403133-7403234	Cluster_1023	102	40	3.921	0	0.05	-	GGCGGGCC	35	0.15	N	N2	-1	40	0	0	0	0	0	0
unitig_0:7415941-7416224	Cluster_1024	284	48	4.705	0	0.979	+	CCCGUGG	41	0.167	N	N2	-1	48	0	0	0	0	0	0
unitig_0:7424798-7424814	Cluster_1025	17	23	2.255	0	1	+	CCGGUACACUUGAAC	11	0.217	N	N2	-1	23	0	0	0	0	0	0
unitig_0:7439452-7439501	Cluster_1026	50	47	4.607	0	0	-	GGCGGGCC	40	0.064	N	N2	-1	46	0	1	0	0	0	0
unitig_0:7439591-7439697	Cluster_1027	107	22	2.157	0	0.136	-	UUCCCCACGGACGUCGCCA	11	0.5	N	N2	-1	22	0	0	0	0	0	0
unitig_0:7455077-7455083	Cluster_1028	7	24	2.353	0	0	-	CCCGUGG	24	0.042	N	N2	-1	24	0	0	0	0	0	0
unitig_0:7456214-7456254	Cluster_1029	41	23	2.255	0	1	+	UCCUCCUGUUCCAUCCCU	16	0.217	N	N2	-1	22	1	0	0	0	0	0
unitig_0:7457529-7457653	Cluster_1030	125	245	24.017	0	0	-	AUGGGUGAUGCAACACCGAGUUUCUGAUGCAC	24	0.396	N	N2	-1	43	149	4	7	29	4	9
unitig_0:7457737-7457810	Cluster_1031	74	494	48.426	0	0.002	-	AUGGGUGAUGCAACCCCGAGUUUCUGAUG	82	0.249	N	N2	-1	68	349	3	2	25	12	35
unitig_0:7467267-7467784	Cluster_1032	518	27	2.647	0	0.185	-	CCUUUCCCCGCCUCCA	3	0.889	N	N2	-1	6	16	0	2	1	1	1
unitig_0:7468640-7468859	Cluster_1033	220	60	5.882	0	0.917	+	CCCGUGG	43	0.15	N	N2	-1	57	3	0	0	0	0	0
unitig_0:7469074-7469087	Cluster_1034	14	58	5.686	0	0.155	-	GGCGGGCC	47	0.121	N	N2	-1	58	0	0	0	0	0	0
unitig_0:7482048-7482083	Cluster_1035	36	31	3.039	0	0.032	-	CACAGGGCUCUGCGAAGUC	18	0.097	N	N2	-1	31	0	0	0	0	0	0
unitig_0:7489369-7489436	Cluster_1036	68	26	2.549	0	0.923	+	CCCCACCGUGGGCGCCA	10	0.462	N	N2	-1	26	0	0	0	0	0	0
unitig_0:7490880-7491011	Cluster_1037	132	21	2.059	0	1	+	AGGAUCAUUG	17	0.19	N	N2	-1	21	0	0	0	0	0	0
unitig_0:7491893-7492089	Cluster_1038	197	37	3.627	0	0.054	-	CAACGGAACCA	28	0.189	N	N2	-1	36	1	0	0	0	0	0
unitig_0:7496916-7496937	Cluster_1039	22	20	1.961	0	0	-	UCUACUAUUGCAUACCCAG	8	0.2	N	N2	-1	8	0	8	3	1	0	0
unitig_0:7501081-7501168	Cluster_1040	88	24	2.353	0	0.917	+	GCCGGGGC	20	0.167	N	N2	-1	24	0	0	0	0	0	0
unitig_0:7501274-7501294	Cluster_1041	21	29	2.843	0	1	+	UUCCCGGGCCU	8	0.448	N	N2	-1	29	0	0	0	0	0	0
unitig_0:7522298-7522407	Cluster_1042	110	65	6.372	0	0.985	+	CCCGUGG	62	0.062	N	N2	-1	64	0	0	0	0	1	0
unitig_0:7526778-7526844	Cluster_1043	67	23	2.255	0	0.043	-	CCCGUGG	21	0.13	N	N2	-1	23	0	0	0	0	0	0
unitig_0:7528464-7528470	Cluster_1044	7	20	1.961	0	0	-	CCCGUGG	20	0.05	N	N2	-1	20	0	0	0	0	0	0
unitig_0:7533461-7533777	Cluster_1045	317	23	2.255	0	0.522	0	GGACUGGGA	10	0.522	N	N2	-1	14	6	0	0	1	1	1
unitig_0:7537960-7537996	Cluster_1046	37	27	2.647	0	0.963	+	CCGGGCC	10	0.185	N	N2	-1	26	0	0	0	0	1	0
unitig_0:7551096-7551102	Cluster_1047	7	39	3.823	0	1	+	CCCGUGG	39	0.026	N	N2	-1	39	0	0	0	0	0	0
unitig_0:7566346-7566352	Cluster_1048	7	50	4.901	0	1	+	CCCGUGG	49	0.04	N	N2	-1	50	0	0	0	0	0	0
unitig_0:7586216-7586246	Cluster_1049	31	45	4.411	0	1	+	CCCGUGG	34	0.111	N	N2	-1	45	0	0	0	0	0	0
unitig_0:7589502-7589600	Cluster_1050	99	30	2.941	0	0.967	+	CCUCGUCUUCCAUCCCU	7	0.4	N	N2	-1	28	0	2	0	0	0	0
unitig_0:7621005-7621020	Cluster_1051	16	68	6.666	0	0	-	GGCGGGCC	63	0.059	N	N2	-1	68	0	0	0	0	0	0
unitig_0:7650975-7651035	Cluster_1052	61	58	5.686	0	0.017	-	CCUGGCCGUCACGC	43	0.121	N	N2	-1	58	0	0	0	0	0	0
unitig_0:7678166-7678348	Cluster_1053	183	1025	100.479	0	0	-	UGACAGAAGAGAGUGGGCAU	499	0.047	20	Y	-1	20	0	513	431	44	16	1
unitig_0:7685615-7685719	Cluster_1054	105	1037	101.656	0	0.002	-	GCUCUCUAUCUUUCUGUCACC	716	0.049	21	Y	-1	8	3	157	823	35	11	0
unitig_0:7699732-7699790	Cluster_1055	59	70	6.862	0	1	+	CCCGUGG	66	0.071	N	N2	-1	70	0	0	0	0	0	0
unitig_0:7729736-7729742	Cluster_1056	7	35	3.431	0	1	+	CCCGUGG	35	0.029	N	N2	-1	35	0	0	0	0	0	0
unitig_0:7747725-7747777	Cluster_1057	53	34	3.333	0	0.941	+	CGCCGAGGGC	16	0.118	N	N2	-1	34	0	0	0	0	0	0
unitig_0:7751807-7752023	Cluster_1058	217	22	2.157	0	0.045	-	UCUGAGGCCU	5	0.545	N	N2	-1	19	3	0	0	0	0	0
unitig_0:7756506-7756976	Cluster_1059	471	2698	264.481	0	1	+	UCCCGAUGAUGGCA	859	0.125	N	N2	-1	1036	1518	5	15	23	65	36
unitig_0:7777756-7777817	Cluster_1060	62	24	2.353	0	0.042	-	UCCCACUCUCAACACCA	23	0.083	N	N2	-1	24	0	0	0	0	0	0
unitig_0:7804004-7804163	Cluster_1061	160	51	4.999	0	1	+	CCCGUGG	48	0.078	N	N2	-1	50	1	0	0	0	0	0
unitig_0:7826449-7826527	Cluster_1062	79	28	2.745	0	0.036	-	AUGAGUCCUCUCCU	27	0.071	N	N2	-1	28	0	0	0	0	0	0
unitig_0:7833540-7833552	Cluster_1063	13	41	4.019	0	0	-	CGGUUCCCGUGG	20	0.122	N	N2	-1	41	0	0	0	0	0	0
unitig_0:7834197-7834224	Cluster_1064	28	37	3.627	0	0.784	0	CGCCGAGGGC	14	0.216	N	N2	-1	36	1	0	0	0	0	0
unitig_0:7834297-7834405	Cluster_1065	109	20	1.961	0	0.5	0	CCGGGCC	8	0.35	N	N2	-1	19	1	0	0	0	0	0
unitig_0:7844191-7844410	Cluster_1066	220	20	1.961	0	0.8	+	GCCGCGCCG	8	0.55	N	N2	-1	19	0	0	1	0	0	0
unitig_0:7850380-7850386	Cluster_1067	7	45	4.411	0	1	+	CCCGUGG	45	0.022	N	N2	-1	45	0	0	0	0	0	0
unitig_0:7854338-7854411	Cluster_1068	74	456	44.701	0	0.998	+	GCUGGAGUAGCUCAG	120	0.202	N	N2	-1	274	117	25	17	6	7	10
unitig_0:7871457-7871478	Cluster_1069	22	31	3.039	0	0.613	0	GGGGGCC	14	0.29	N	N2	-1	31	0	0	0	0	0	0
unitig_0:7882596-7882943	Cluster_1070	348	449	44.015	0	0.987	+	CGAGAAUUUUUGGAAGGGUAGACUACGGUCAUUCCCU	31	0.359	N	N2	-1	73	294	40	20	12	6	4
unitig_0:7883293-7883511	Cluster_1071	219	25726	2521.88	0	0	-	CGGGGUUCGUUUCCCCGGAUGCGCACCA	5267	0.017	N	N2	-1	4773	18755	510	807	240	337	304
unitig_0:7883591-7883745	Cluster_1072	155	171	16.763	0	0.012	-	CCUGGUCGUCACGC	145	0.105	N	N2	-1	171	0	0	0	0	0	0
unitig_0:7893223-7893237	Cluster_1073	15	34	3.333	0	1	+	AUCACCUCCU	23	0.088	N	N2	-1	34	0	0	0	0	0	0
unitig_0:7904499-7904623	Cluster_1074	125	24	2.353	0	0.542	0	GCCGGGGC	6	0.542	N	N2	-1	20	4	0	0	0	0	0
unitig_0:7908326-7908707	Cluster_1075	382	964	94.5	0	0.118	-	GGCGGGCC	99	0.48	N	N2	-1	186	486	27	52	23	55	135
unitig_0:7916629-7916717	Cluster_1076	89	40	3.921	0	0.975	+	GGAUGCGCACCA	18	0.2	N	N2	-1	40	0	0	0	0	0	0
unitig_0:7926911-7926989	Cluster_1077	79	26	2.549	0	0	-	CCCGUGG	21	0.115	N	N2	-1	26	0	0	0	0	0	0
unitig_0:7929574-7929680	Cluster_1078	107	143	14.018	0	0.986	+	GGCGGGCC	134	0.042	N	N2	-1	142	0	1	0	0	0	0
unitig_0:7937947-7937963	Cluster_1079	17	42	4.117	0	0	-	CCUGCGUCACGC	38	0.071	N	N2	-1	42	0	0	0	0	0	0
unitig_0:7943134-7943144	Cluster_1080	11	55	5.392	0	1	+	AGUGCUCUCCU	51	0.055	N	N2	-1	55	0	0	0	0	0	0
unitig_0:7954934-7955163	Cluster_1081	230	31	3.039	0	0.032	-	UUCUACUCAUUGUCCUUUGAACUAG	11	0.387	N	N2	-1	5	24	0	0	0	0	2
unitig_0:7957516-7957525	Cluster_1082	10	58	5.686	0	1	+	CCCGUGG	56	0.052	N	N2	-1	58	0	0	0	0	0	0
unitig_0:7957744-7957750	Cluster_1083	7	22	2.157	0	0	-	CCCGUGG	21	0.091	N	N2	-1	22	0	0	0	0	0	0
unitig_0:7966909-7967037	Cluster_1084	129	27	2.647	0	0.037	-	UCGACGCCAGGAUACC	11	0.296	N	N2	-1	27	0	0	0	0	0	0
unitig_0:7967915-7967939	Cluster_1085	25	29	2.843	0	0	-	CCCGUGG	26	0.069	N	N2	-1	29	0	0	0	0	0	0
unitig_0:7980059-7980082	Cluster_1086	24	28	2.745	0	1	+	GAUCACCUCCU	16	0.179	N	N2	-1	28	0	0	0	0	0	0
unitig_0:7988436-7988449	Cluster_1087	14	44	4.313	0	1	+	AUUAGUGCUCUCCU	41	0.091	N	N2	-1	44	0	0	0	0	0	0
unitig_0:8003764-8004137	Cluster_1088	374	26	2.549	0	1	+	CGAGGUUGAUGCAGAUGGGAAUGGAACCAU	1	1	N	N2	-1	7	12	1	1	3	1	1
unitig_0:8015923-8015951	Cluster_1089	29	43	4.215	0	1	+	UUCCUUGACUUCGUACAG	17	0.279	N	N2	-1	32	1	5	2	0	3	0
unitig_0:8027189-8027208	Cluster_1090	20	35	3.431	0	0	-	UUCCCCUUCCUCUAGCGCCA	25	0.143	20	N11	-1	1	0	34	0	0	0	0
unitig_0:8044153-8044201	Cluster_1091	49	65	6.372	0	1	+	CCCGUGG	57	0.092	N	N2	-1	65	0	0	0	0	0	0
unitig_0:8059000-8059006	Cluster_1092	7	25	2.451	0	0	-	CCCGUGG	25	0.04	N	N2	-1	25	0	0	0	0	0	0
unitig_0:8065549-8065640	Cluster_1093	92	16808	1647.66	0	1	+	UGACAGAAGAGAGUGAGCAC	15086	0.006	20	Y	-1	115	4	15199	1388	81	16	5
unitig_0:8075804-8075858	Cluster_1094	55	24	2.353	0	0	-	CCCGUGG	22	0.125	N	N2	-1	24	0	0	0	0	0	0
unitig_0:8087318-8087509	Cluster_1095	192	21	2.059	0	0.857	+	GCCGGUCCGCA	11	0.286	N	N2	-1	20	1	0	0	0	0	0
unitig_0:8104378-8104625	Cluster_1096	248	45	4.411	0	0.111	-	CCCGUGG	32	0.267	N	N2	-1	42	3	0	0	0	0	0
unitig_0:8113391-8113424	Cluster_1097	34	47	4.607	0	1	+	CCCGUGG	45	0.064	N	N2	-1	46	0	1	0	0	0	0
unitig_0:8114746-8114839	Cluster_1098	94	89	8.725	0	1	+	CCCGUGG	37	0.067	N	N2	-1	89	0	0	0	0	0	0
unitig_0:8120616-8120762	Cluster_1099	147	64	6.274	0	0.938	+	CCCGUGG	58	0.109	N	N2	-1	62	1	0	0	0	0	1
unitig_0:8134926-8135039	Cluster_1100	114	19327	1894.6	0	0.999	+	UUCCACAGCUUUCUUGAACUG	13195	0.009	N	N2	-1	4455	5	555	14119	178	12	3
unitig_0:8147663-8147937	Cluster_1101	275	28	2.745	0	0.964	+	AUCACCUCCU	15	0.464	N	N2	-1	25	2	0	0	1	0	0
unitig_0:8148022-8148165	Cluster_1102	144	24	2.353	0	1	+	AUCACCUCCU	17	0.208	N	N2	-1	24	0	0	0	0	0	0
unitig_0:8178882-8178903	Cluster_1103	22	59	5.784	0	1	+	GAUAUACCCGUGGCGCCC	41	0.119	N	N2	-1	58	0	0	1	0	0	0
unitig_0:8180195-8180207	Cluster_1104	13	25	2.451	0	0.96	+	GCCGGGGC	11	0.2	N	N2	-1	25	0	0	0	0	0	0
unitig_0:8181371-8181395	Cluster_1105	25	40	3.921	0	0.05	-	GCUCCCGGCAAACCACCA	26	0.2	N	N2	-1	40	0	0	0	0	0	0
unitig_0:8189762-8189782	Cluster_1106	21	55	5.392	0	1	+	CCCGUGG	54	0.036	N	N2	-1	55	0	0	0	0	0	0
unitig_0:8192508-8192524	Cluster_1107	17	37	3.627	0	0.865	+	CGCCGAGGGC	23	0.162	N	N2	-1	37	0	0	0	0	0	0
unitig_0:8202284-8202489	Cluster_1108	206	26	2.549	0	0.308	0	CCCGUGG	10	0.5	N	N2	-1	26	0	0	0	0	0	0
unitig_0:8238405-8239100	Cluster_1109	696	61	5.98	0	0.918	+	CCCGUGG	44	0.279	N	N2	-1	53	2	0	3	1	2	0
unitig_0:8244160-8244178	Cluster_1110	19	33	3.235	0	0	-	AAUCCCUCCUCCCACCA	17	0.121	N	N2	-1	33	0	0	0	0	0	0
unitig_0:8246341-8246363	Cluster_1111	23	413	40.486	0	1	+	UCCUCUUAUCUCCACCA	256	0.036	N	N2	-1	408	0	0	3	2	0	0
unitig_0:8255138-8255199	Cluster_1112	62	34	3.333	0	0	-	AUAGAACUGAUGUCAGACACUUGUUUAG	11	0.471	N	N2	-1	2	21	2	2	1	5	1
unitig_0:8260402-8260504	Cluster_1113	103	20	1.961	0	0.1	-	ACCGUAGACUUGAAC	12	0.3	N	N2	-1	19	0	0	1	0	0	0
unitig_0:8263450-8263520	Cluster_1114	71	53	5.196	0	1	+	CCCGUGG	50	0.075	N	N2	-1	52	0	0	1	0	0	0
unitig_0:8267897-8267997	Cluster_1115	101	31	3.039	0	0.032	-	AUUCCCCUAUCCGCCCCA	29	0.097	N	N2	-1	30	0	0	1	0	0	0
unitig_0:8275606-8275703	Cluster_1116	98	21	2.059	0	1	+	UCAUCCCUACCA	16	0.286	N	N2	-1	21	0	0	0	0	0	0
unitig_0:8296711-8296717	Cluster_1117	7	47	4.607	0	1	+	CCCGUGG	47	0.021	N	N2	-1	47	0	0	0	0	0	0
unitig_0:8304692-8304709	Cluster_1118	18	55	5.392	0	0.964	+	CCCGUGG	53	0.055	N	N2	-1	55	0	0	0	0	0	0
unitig_0:8305930-8305951	Cluster_1119	22	20	1.961	0	0.95	+	GGCGCGGCU	6	0.55	N	N2	-1	19	0	1	0	0	0	0
unitig_0:8310214-8310397	Cluster_1120	184	22	2.157	0	0.864	+	GCCGGGGC	14	0.364	N	N2	-1	22	0	0	0	0	0	0
unitig_0:8313771-8313860	Cluster_1121	90	30	2.941	0	0.033	-	CCCGUGG	28	0.1	N	N2	-1	29	0	0	1	0	0	0
unitig_0:8317779-8317977	Cluster_1122	199	26	2.549	0	0.923	+	CAUCUCCACCA	20	0.231	N	N2	-1	26	0	0	0	0	0	0
unitig_0:8318183-8318374	Cluster_1123	192	23	2.255	0	0.043	-	CCCGGCUGGUUCACCA	15	0.261	N	N2	-1	22	1	0	0	0	0	0
unitig_0:8319307-8319313	Cluster_1124	7	49	4.803	0	1	+	CCCGUGG	48	0.041	N	N2	-1	49	0	0	0	0	0	0
unitig_0:8322776-8322880	Cluster_1125	105	589	57.739	0	0	-	GUCAGGAUGGCCGA	65	0.19	N	N2	-1	283	246	3	16	9	17	15
unitig_0:8345346-8345377	Cluster_1126	32	42	4.117	0	0.048	-	GCUUGAUCACCUCCU	15	0.405	N	N2	-1	28	1	12	1	0	0	0
unitig_0:8368458-8368709	Cluster_1127	252	4227	414.367	0	1	+	GCACCAGUGGUCUAGUGGUAGAAUAGUACCCU	503	0.195	N	N2	-1	200	3653	38	81	89	71	95
unitig_0:8370085-8370192	Cluster_1128	108	33	3.235	0	0	-	UUUCUGGUCCUCG	9	0.333	N	N2	-1	32	0	0	0	0	1	0
unitig_0:8390202-8390249	Cluster_1129	48	162	15.881	0	1	+	CAUGUUCUCAGGUCGCCCCUG	137	0.086	21	N15	-1	9	0	8	144	0	1	0
unitig_0:8397258-8397428	Cluster_1130	171	32	3.137	0	0.031	-	CCCGUGG	24	0.281	N	N2	-1	29	2	0	0	0	0	1
unitig_0:8404996-8405002	Cluster_1131	7	54	5.294	0	1	+	CCCGUGG	49	0.037	N	N2	-1	54	0	0	0	0	0	0
unitig_0:8409967-8410065	Cluster_1132	99	20	1.961	0	0.1	-	CCCGUGG	11	0.45	N	N2	-1	17	3	0	0	0	0	0
unitig_0:8412744-8412844	Cluster_1133	101	59	5.784	0	0.966	+	CCCGUGG	56	0.068	N	N2	-1	58	1	0	0	0	0	0
unitig_0:8417523-8417593	Cluster_1134	71	25	2.451	0	0.2	-	CCCAUCUCCACCA	9	0.36	N	N2	-1	24	1	0	0	0	0	0
unitig_0:8420539-8420562	Cluster_1135	24	114	11.175	0	1	+	UUUCCCGGCUCCACCA	58	0.07	N	N2	-1	114	0	0	0	0	0	0
unitig_0:8423787-8423894	Cluster_1136	108	28	2.745	0	0.964	+	CAUCUCCACCA	19	0.214	N	N2	-1	28	0	0	0	0	0	0
unitig_0:8430675-8430681	Cluster_1137	7	40	3.921	0	1	+	CCCGUGG	40	0.025	N	N2	-1	40	0	0	0	0	0	0
unitig_0:8448272-8448394	Cluster_1138	123	32	3.137	0	0.062	-	CCCGUGG	15	0.156	N	N2	-1	31	1	0	0	0	0	0
unitig_0:8450361-8450383	Cluster_1139	23	84	8.234	0	1	+	UUUCCCGGCUCCACCA	71	0.048	N	N2	-1	84	0	0	0	0	0	0
unitig_0:8468953-8468968	Cluster_1140	16	45	4.411	0	0.756	0	CGCCGAGGGC	26	0.2	N	N2	-1	45	0	0	0	0	0	0
unitig_0:8471470-8471562	Cluster_1141	93	57	5.588	0	1	+	CCCGUGG	53	0.088	N	N2	-1	57	0	0	0	0	0	0
unitig_0:8494720-8494727	Cluster_1142	8	51	4.999	0	0	-	GGCGGGCC	48	0.039	N	N2	-1	51	0	0	0	0	0	0
unitig_0:8495691-8495923	Cluster_1143	233	30	2.941	0	0.933	+	GCCGGGGC	17	0.233	N	N2	-1	27	1	0	1	1	0	0
unitig_8:14398-14491	Cluster_1144	94	33	3.235	0	0.273	0	CCCGUGG	23	0.303	N	N2	-1	32	1	0	0	0	0	0
unitig_8:27601-27761	Cluster_1145	161	48	4.705	0	0.979	+	CCCGUGG	44	0.083	N	N2	-1	47	0	0	1	0	0	0
unitig_8:35486-35511	Cluster_1146	26	28	2.745	0	1	+	AUCACCUCCU	20	0.107	N	N2	-1	28	0	0	0	0	0	0
unitig_8:49082-49279	Cluster_1147	198	33	3.235	0	0.061	-	UCCUUGCAUCCCU	23	0.242	N	N2	-1	31	1	0	1	0	0	0
unitig_8:54118-54184	Cluster_1148	67	22	2.157	0	0.955	+	GCCGGGGC	20	0.136	N	N2	-1	22	0	0	0	0	0	0
unitig_8:66232-66426	Cluster_1149	195	380	37.251	0	1	+	GGUGUCGUGGUGUA	33	0.342	N	N2	-1	186	152	6	6	5	4	21
unitig_8:75486-75565	Cluster_1150	80	44	4.313	0	0.023	-	CCCUGCGCUGGACUGA	31	0.114	N	N2	-1	43	0	1	0	0	0	0
unitig_8:76029-76048	Cluster_1151	20	30	2.941	0	0	-	GUCCAAGGGUUCCUGCGU	13	0.167	N	N2	-1	26	0	4	0	0	0	0
unitig_8:81835-81858	Cluster_1152	24	180	17.645	0	0	-	UGACAGAAGAGAGUGAGCACC	101	0.089	21	N12	-1	35	0	4	121	5	13	2
unitig_8:82487-82505	Cluster_1153	19	92	9.019	0	0	-	UCCCCUUAUCUCCACCA	91	0.022	N	N2	-1	92	0	0	0	0	0	0
unitig_8:104732-104909	Cluster_1154	178	129	12.646	0	0.984	+	GGCGGGCC	112	0.054	N	N2	-1	127	1	0	0	0	0	1
unitig_8:110543-110926	Cluster_1155	384	24	2.353	0	0.875	+	UCAUGUGGGCUC	6	0.458	N	N2	-1	24	0	0	0	0	0	0
unitig_8:115819-115998	Cluster_1156	180	22	2.157	0	0.909	+	AAUCCCUCCCCCCCACCA	2	0.909	N	N2	-1	13	7	1	0	1	0	0
unitig_8:116226-116762	Cluster_1157	537	39	3.823	0	0.949	+	GCCAGCAGUGCCCCG	1	1	N	N2	-1	10	17	0	1	5	4	2
unitig_8:117420-117426	Cluster_1158	7	74	7.254	0	1	+	CCCGUGG	73	0.027	N	N2	-1	74	0	0	0	0	0	0
unitig_8:118578-118962	Cluster_1159	385	24	2.353	0	0.5	0	GGCGCGGCU	5	0.792	N	N2	-1	15	2	0	3	3	1	0
unitig_8:119058-119399	Cluster_1160	342	41	4.019	0	0.854	+	UAUGGAGAUUGAACUCUGAGAAUUUCUCGUGUG	5	0.805	N	N2	-1	9	24	1	4	3	0	0
unitig_8:121078-121180	Cluster_1161	103	24	2.353	0	0.958	+	CUCCGAUUUGAC	3	0.75	N	N2	-1	20	1	1	1	0	0	1
unitig_8:123449-123836	Cluster_1162	388	22	2.157	0	0.545	0	CAACGGCCCCA	6	0.682	N	N2	-1	10	5	0	1	4	1	1
unitig_8:127669-127688	Cluster_1163	20	168	16.469	0	0	-	CGAGUAGCGGCACCA	145	0.048	N	N2	-1	168	0	0	0	0	0	0
unitig_8:128119-128268	Cluster_1164	150	20	1.961	0	1	+	CCCUCGGCG	5	0.65	N	N2	-1	16	3	0	0	0	0	1
unitig_8:141525-141540	Cluster_1165	16	153	14.998	0	1	+	CCCAGCAGUCACACCA	153	0.007	N	N2	-1	153	0	0	0	0	0	0
unitig_8:142924-143106	Cluster_1166	183	922	90.382	0	0.002	-	GCGUUUGUAGUCCAACGGUUAGGAUAAUUGCCU	163	0.238	N	N2	-1	240	649	3	8	2	5	15
unitig_8:150347-151521	Cluster_1167	1175	107	10.489	0	0.776	0	AUUCCCCUACCCGCUCCA	14	0.626	N	N2	-1	68	6	5	16	11	1	0
unitig_8:157036-157048	Cluster_1168	13	43	4.215	0	0	-	AGUGCUCUCCU	18	0.093	N	N2	-1	43	0	0	0	0	0	0
unitig_8:181019-181450	Cluster_1169	432	22	2.157	0	0.955	+	ACGCUGCCGGGC	3	0.864	N	N2	-1	11	7	1	0	1	0	2
unitig_8:181525-181632	Cluster_1170	108	23	2.255	0	0.957	+	GCCGGGGC	19	0.217	N	N2	-1	22	0	0	1	0	0	0
unitig_8:194897-194962	Cluster_1171	66	64	6.274	0	1	+	CCCGUGG	59	0.062	N	N2	-1	64	0	0	0	0	0	0
unitig_8:195963-195985	Cluster_1172	23	115	11.273	0	1	+	GGCGGGCC	105	0.026	N	N2	-1	115	0	0	0	0	0	0
unitig_8:202923-203014	Cluster_1173	92	591	57.935	0	1	+	CCCAUCGCGAUCGCCA	211	0.039	N	N2	-1	590	0	1	0	0	0	0
unitig_8:231858-231927	Cluster_1174	70	43	4.215	0	0	-	CCAAGUGAUGUAGACCUGACCU	20	0.186	22	N11	-1	0	2	0	10	26	3	2
unitig_8:237410-237567	Cluster_1175	158	23	2.255	0	0.087	-	CGUGUUCCAUCCCU	12	0.391	N	N2	-1	23	0	0	0	0	0	0
unitig_8:289906-289920	Cluster_1176	15	46	4.509	0	1	+	AUCAGUUCUCUCCU	37	0.087	N	N2	-1	46	0	0	0	0	0	0
unitig_8:293799-293989	Cluster_1177	191	61	5.98	0	0.984	+	UUGCGUCAUGAUA	21	0.508	N	N2	-1	23	30	0	0	3	1	4
unitig_8:301437-301513	Cluster_1178	77	35	3.431	0	0.914	+	GGCGCGGCU	14	0.286	N	N2	-1	35	0	0	0	0	0	0
unitig_8:303210-303430	Cluster_1179	221	20	1.961	0	0.15	-	CAUGGAAGCGAUAAAACUC	5	0.75	N	N2	-1	13	2	0	1	1	0	3
unitig_8:303931-304268	Cluster_1180	338	30	2.941	0	0.067	-	CAGCAGUCACACCA	18	0.367	N	N2	-1	24	5	0	1	0	0	0
unitig_8:305992-306012	Cluster_1181	21	25	2.451	0	0	-	CCCGCCAGUCCCGCCA	22	0.12	N	N2	-1	25	0	0	0	0	0	0
unitig_8:306135-306592	Cluster_1182	458	29	2.843	0	0.862	+	UUCAAUGGCUUCUCUGACCCU	2	0.931	N	N2	-1	11	9	1	6	2	0	0
unitig_8:314906-315068	Cluster_1183	163	1882	184.49	0	0.977	+	UUUAGGGGGACUGACCGCCGC	652	0.08	N	N2	-1	592	8	152	738	338	46	8
unitig_8:318590-318680	Cluster_1184	91	45	4.411	0	1	+	CUCGGCCCACCA	31	0.156	N	N2	-1	45	0	0	0	0	0	0
unitig_8:322031-322049	Cluster_1185	19	77	7.548	0	1	+	ACUCCCCUUAUCUCCACCA	34	0.078	N	N2	-1	77	0	0	0	0	0	0
unitig_8:337200-337216	Cluster_1186	17	96	9.411	0	1	+	CUCACCGCACCA	62	0.104	N	N2	-1	96	0	0	0	0	0	0
unitig_8:350156-350550	Cluster_1187	395	24	2.353	0	0.875	+	GGGAGGAGCUGGAGAAUGAGAACGAAGA	2	0.958	N	N2	-1	8	12	2	0	1	1	0
unitig_8:351008-351485	Cluster_1188	478	20	1.961	0	0.85	+	CGCGGCGGCG	3	0.9	N	N2	-1	12	3	0	3	1	0	1
unitig_8:356514-356891	Cluster_1189	378	72	7.058	0	0.111	-	GGCGGGCC	45	0.236	N	N2	-1	68	0	0	2	2	0	0
unitig_8:384464-384473	Cluster_1190	10	66	6.47	0	1	+	CCCGUGG	63	0.061	N	N2	-1	66	0	0	0	0	0	0
unitig_8:445261-445349	Cluster_1191	89	123	12.058	0	0.992	+	GGCGGGCC	116	0.041	N	N2	-1	122	0	0	0	1	0	0
unitig_8:448092-448214	Cluster_1192	123	45	4.411	0	0.978	+	UCGGCGUCACGC	24	0.222	N	N2	-1	45	0	0	0	0	0	0
unitig_8:452600-452609	Cluster_1193	10	25	2.451	0	0	-	CACGUUCCCG	19	0.16	N	N2	-1	25	0	0	0	0	0	0
unitig_8:476522-476890	Cluster_1194	369	24	2.353	0	0.333	0	CCCGUGG	7	0.667	N	N2	-1	20	3	0	0	0	1	0
unitig_8:481734-481748	Cluster_1195	15	20	1.961	0	0	-	UCCCACACGGCGCCA	16	0.2	N	N2	-1	20	0	0	0	0	0	0
unitig_8:484095-484193	Cluster_1196	99	53	5.196	0	0.943	+	CCCGUGG	46	0.113	N	N2	-1	53	0	0	0	0	0	0
unitig_8:495402-495443	Cluster_1197	42	24	2.353	0	0.042	-	CCCGUGG	22	0.125	N	N2	-1	24	0	0	0	0	0	0
unitig_8:499890-499937	Cluster_1198	48	25	2.451	0	1	+	GCCCAUGGUACUGUGCC	15	0.2	N	N2	-1	25	0	0	0	0	0	0
unitig_8:510212-510234	Cluster_1199	23	41	4.019	0	0	-	GUCGAGCGGGCA	35	0.146	N	N2	-1	41	0	0	0	0	0	0
unitig_8:510369-510530	Cluster_1200	162	20	1.961	0	0.95	+	CGGCCGGUC	12	0.35	N	N2	-1	19	1	0	0	0	0	0
unitig_8:511758-511766	Cluster_1201	9	32	3.137	0	0	-	CCCGUGG	28	0.062	N	N2	-1	32	0	0	0	0	0	0
unitig_8:513510-513985	Cluster_1202	476	26	2.549	0	0.077	-	UUGCCUAAUGCCAAUGUUUGCAG	2	0.962	N	N2	-1	4	18	0	0	0	2	2
unitig_8:521063-521077	Cluster_1203	15	90	8.823	0	0	-	GCCUUGGGGAGCUG	87	0.033	N	N2	-1	90	0	0	0	0	0	0
unitig_8:525598-525739	Cluster_1204	142	28	2.745	0	0.036	-	CCCGUGG	23	0.214	N	N2	-1	27	1	0	0	0	0	0
unitig_8:541256-541357	Cluster_1205	102	20	1.961	0	1	+	AGGACAUUGGACU	8	0.45	N	N2	-1	20	0	0	0	0	0	0
unitig_8:541853-542381	Cluster_1206	529	397	38.917	0	0.71	0	UUCUUGUCCAUUCGUUUCCCG	56	0.413	21	N5	28.9	41	9	18	252	63	2	12
unitig_8:545581-545592	Cluster_1207	12	46	4.509	0	1	+	CCCGUGG	38	0.065	N	N2	-1	46	0	0	0	0	0	0
unitig_8:604918-604932	Cluster_1208	15	71	6.96	0	1	+	CCCGUGG	55	0.056	N	N2	-1	71	0	0	0	0	0	0
unitig_8:633336-633401	Cluster_1209	66	29	2.843	0	0.034	-	CCCGUGG	27	0.103	N	N2	-1	29	0	0	0	0	0	0
unitig_8:635515-635613	Cluster_1210	99	20	1.961	0	0	-	CCCGUGG	18	0.15	N	N2	-1	19	1	0	0	0	0	0
unitig_8:639943-640693	Cluster_1211	751	40	3.921	0	0.525	0	UCACCAGGCAAGGAUCAGACU	1	1	N	N2	-1	5	5	0	13	13	4	0
unitig_8:642218-643003	Cluster_1212	786	20	1.961	0	0.7	0	AGCACCACCGUUCACAGAUCUG	1	1	N	N2	-1	4	6	0	3	6	1	0
unitig_8:644891-645446	Cluster_1213	556	21	2.059	0	0.429	0	GUCGCUUUGGC	5	0.81	N	N2	-1	12	7	1	0	1	0	0
unitig_8:657533-657726	Cluster_1214	194	60	5.882	0	0.767	0	CCCGUGG	34	0.2	N	N2	-1	59	1	0	0	0	0	0
unitig_8:664718-664744	Cluster_1215	27	156	15.292	0	0	-	UGACAGAAGAGAGAGAGCAC	141	0.058	20	N11	-1	2	1	141	10	2	0	0
unitig_8:670858-671403	Cluster_1216	546	2662	260.952	0	0.005	-	CCCUGCUGUCGACGCCA	317	0.101	N	N2	-1	1327	662	33	149	94	274	123
unitig_8:672852-672926	Cluster_1217	75	27	2.647	0	0.037	-	UCCCGGCAACUGAACC	13	0.407	N	N2	-1	27	0	0	0	0	0	0
unitig_8:673262-673309	Cluster_1218	48	44	4.313	0	0.023	-	AAUGCCCCCCA	41	0.091	N	N2	-1	44	0	0	0	0	0	0
unitig_8:675577-675591	Cluster_1219	15	53	5.196	0	0.981	+	CCCGUGG	50	0.075	N	N2	-1	53	0	0	0	0	0	0
unitig_8:678039-678062	Cluster_1220	24	433	42.446	0	0.012	-	UGACAGAAGAGAGUGAGCACC	405	0.037	21	N11	-1	5	0	10	414	4	0	0
unitig_8:678449-679645	Cluster_1221	1197	365	35.78	0	0.025	-	UCCCGGCAACGCAACCA	162	0.29	N	N2	-1	290	54	4	8	3	4	2
unitig_8:709464-709524	Cluster_1222	61	72	7.058	0	0.986	+	CACUGUGGUCGCCA	31	0.139	N	N2	-1	72	0	0	0	0	0	0
unitig_8:711494-711880	Cluster_1223	387	49	4.803	0	0.959	+	AUCGCAGGGAUGCAUCGUCAAGGAGAUUGAGCCGAUUUACC	1	1	N	N2	-1	12	25	4	1	0	2	5
unitig_8:711964-712478	Cluster_1224	515	60	5.882	0	0.983	+	CCUCGUCCUGGCAAUGCUGUGGCGCCACCCGGAGAA	2	0.95	N	N2	-1	8	39	0	3	3	2	5
unitig_8:712547-712823	Cluster_1225	277	27	2.647	0	0.889	+	GCCGGCGAUCAUCGCGUCUGCUCCUGAACC	2	0.963	N	N2	-1	6	11	1	3	3	0	3
unitig_8:723930-724383	Cluster_1226	454	24	2.353	0	1	+	GCUCACGGCUGCGCAGUACGCUGAAUUCAGUAAGAUC	1	1	N	N2	-1	3	16	0	1	2	0	2
unitig_8:724544-725669	Cluster_1227	1126	82	8.038	0	0.915	+	CCGGGCC	4	0.939	N	N2	-1	19	36	1	9	7	4	6
unitig_8:734259-734289	Cluster_1228	31	66	6.47	0	0	-	UCUACAUCGCUACUGAUUUUUCUAAUGAAG	26	0.152	N	N2	-1	0	32	0	4	10	20	0
unitig_8:740640-740676	Cluster_1229	37	118	11.567	0	1	+	UACACUUGAUUCUUUGUUGUCUAG	65	0.093	24	N11	-1	1	17	0	0	21	14	65
unitig_8:752979-752989	Cluster_1230	11	25	2.451	0	0	-	CCCGUGG	23	0.12	N	N2	-1	25	0	0	0	0	0	0
unitig_8:757843-757955	Cluster_1231	113	55	5.392	0	0.018	-	UAUCUGAGGCCU	29	0.218	N	N2	-1	54	1	0	0	0	0	0
unitig_8:767550-767559	Cluster_1232	10	61	5.98	0	0.984	+	CCCGUGG	58	0.049	N	N2	-1	61	0	0	0	0	0	0
unitig_8:768600-768720	Cluster_1233	121	92	9.019	0	0.011	-	UAUCACAUCAGUCUUACACACUG	3	0.848	N	N2	-1	29	27	6	6	5	14	5
unitig_8:779329-779409	Cluster_1234	81	57	5.588	0	0.93	+	CGCCGAGGGC	28	0.333	N	N2	-1	49	5	0	1	0	2	0
unitig_8:816586-816622	Cluster_1235	37	20	1.961	0	0	-	CCCGUGG	16	0.25	N	N2	-1	19	0	1	0	0	0	0
unitig_8:848533-848697	Cluster_1236	165	49	4.803	0	1	+	CCCGUGG	44	0.102	N	N2	-1	49	0	0	0	0	0	0
unitig_8:848938-848950	Cluster_1237	13	30	2.941	0	0.967	+	GCCGGGGCC	17	0.167	N	N2	-1	30	0	0	0	0	0	0
unitig_8:853409-853425	Cluster_1238	17	23	2.255	0	1	+	ACCGGGCUCA	15	0.261	N	N2	-1	23	0	0	0	0	0	0
unitig_8:858875-859026	Cluster_1239	152	26	2.549	0	0.077	-	CCCGUGG	23	0.154	N	N2	-1	24	1	1	0	0	0	0
unitig_8:859175-859192	Cluster_1240	18	20	1.961	0	1	+	GCAGACUUCAAAACUG	17	0.15	N	N2	-1	20	0	0	0	0	0	0
unitig_8:864296-864389	Cluster_1241	94	52	5.097	0	0.865	+	CCCGUGG	34	0.212	N	N2	-1	52	0	0	0	0	0	0
unitig_8:870058-870444	Cluster_1242	387	37	3.627	0	0.054	-	CCCGUGG	30	0.216	N	N2	-1	32	3	0	1	1	0	0
unitig_8:906447-907105	Cluster_1243	659	26	2.549	0	0.615	0	CCUCGGCG	3	0.885	N	N2	-1	14	6	1	3	1	0	1
unitig_8:907267-907406	Cluster_1244	140	40	3.921	0	0.15	-	GCCGGUCCGCC	18	0.4	N	N2	-1	35	1	0	1	3	0	0
unitig_8:909301-909307	Cluster_1245	7	44	4.313	0	1	+	CCCGUGG	44	0.023	N	N2	-1	44	0	0	0	0	0	0
unitig_8:909628-910126	Cluster_1246	499	97	9.509	0	0.68	0	CCAUGAAGCUGUUGGAGCUCGUCA	4	0.835	24	N5	0.4	3	13	1	7	6	17	50
unitig_8:915615-915629	Cluster_1247	15	77	7.548	0	0	-	GAAUCCCCCCCA	39	0.065	N	N2	-1	77	0	0	0	0	0	0
unitig_8:918647-918742	Cluster_1248	96	21	2.059	0	0.952	+	UUCCCCCAUCUCCACCA	18	0.19	N	N2	-1	21	0	0	0	0	0	0
unitig_8:924763-924775	Cluster_1249	13	22	2.157	0	1	+	GUUGGCCCCUCCA	19	0.091	N	N2	-1	22	0	0	0	0	0	0
unitig_8:928403-928621	Cluster_1250	219	167	16.371	0	0.036	-	GCUCCCGGCAAACUCACCA	89	0.12	N	N2	-1	165	1	0	1	0	0	0
unitig_8:951662-951692	Cluster_1251	31	24	2.353	0	1	+	UCCCCUGAUAGCUUUUCUGAGCAG	11	0.292	N	N2	-1	0	11	0	0	0	0	13
unitig_8:956503-956581	Cluster_1252	79	2715	266.148	0	0.017	-	GGGGUUGUAGCUCAAAUGGUAGAGCGCUCGCUU	671	0.061	N	N2	-1	779	1512	50	84	27	140	123
unitig_8:969439-969703	Cluster_1253	265	54	5.294	0	0.981	+	CCCGUGG	48	0.13	N	N2	-1	51	0	1	2	0	0	0
unitig_8:976255-976420	Cluster_1254	166	390	38.231	0	1	+	UUGGACUGAAGGGA	362	0.023	N	N2	-1	388	1	0	0	0	0	1
unitig_8:989805-990052	Cluster_1255	248	8908	873.239	0	1	+	UCCGUUGUAGUCUAGG	2338	0.094	N	N2	-1	3060	5279	101	58	171	93	146
unitig_8:999142-999742	Cluster_1256	601	26	2.549	0	0.115	-	AUCACCUCCU	6	0.808	N	N2	-1	9	2	0	8	5	1	1
unitig_8:1012764-1013181	Cluster_1257	418	23	2.255	0	0.609	0	CACCUCCACCA	6	0.739	N	N2	-1	14	1	0	3	3	0	2
unitig_8:1022323-1022330	Cluster_1258	8	45	4.411	0	0	-	GGCGGGCC	42	0.044	N	N2	-1	45	0	0	0	0	0	0
unitig_8:1036805-1036995	Cluster_1259	191	22	2.157	0	1	+	UGUACGGGCUCCC	2	0.909	N	N2	-1	8	10	2	1	1	0	0
unitig_8:1062432-1062547	Cluster_1260	116	27	2.647	0	0.111	-	AACGCCCCCCA	21	0.222	N	N2	-1	27	0	0	0	0	0	0
unitig_8:1063031-1063265	Cluster_1261	235	26	2.549	0	0.308	0	CCCGUGG	17	0.308	N	N2	-1	22	1	0	2	0	0	1
unitig_8:1072820-1073432	Cluster_1262	613	411	40.29	0	0	-	GAGCUUCACUAUCUAGUUGACUGGAUUU	23	0.328	N	N2	-1	15	369	5	10	6	4	2
unitig_8:1073530-1073614	Cluster_1263	85	984	96.46	0	0	-	GCAUACAUGAAGUUGGUCUAGUAAGCUGAAGGACAUGA	607	0.104	N	N2	-1	44	920	2	3	8	6	1
unitig_8:1073708-1073833	Cluster_1264	126	398	39.015	0	0	-	CACAUAAAGCAUUAUUCUGAGUUA	99	0.216	N	N2	-1	23	194	10	9	26	30	106
unitig_8:1073929-1074207	Cluster_1265	279	1371	134.397	0	0.001	-	AUUCUUGUGGACAGUCGAAUUUUCUCAUUGAGGCCU	121	0.19	N	N2	-1	65	1089	7	9	49	131	21
unitig_8:1074323-1074521	Cluster_1266	199	262	25.683	0	0.004	-	GGGCAAUGAUGAUGAGUUGU	37	0.481	N	N2	-1	27	172	39	10	3	3	8
unitig_8:1082868-1082875	Cluster_1267	8	21	2.059	0	0	-	CCCGUGG	20	0.095	N	N2	-1	21	0	0	0	0	0	0
unitig_8:1099777-1099823	Cluster_1268	47	71	6.96	0	0.014	-	GGCGGGCC	69	0.042	N	N2	-1	71	0	0	0	0	0	0
unitig_8:1101155-1101421	Cluster_1269	267	16313	1599.14	0	0	-	GAUCGCAUAGCGGAGUGGAUAUCGCUUUAGACU	12217	0.015	N	N2	-1	27	16201	12	30	32	7	4
unitig_8:1103325-1103405	Cluster_1270	81	44	4.313	0	0.023	-	GCAGGUCGGACCA	23	0.205	N	N2	-1	44	0	0	0	0	0	0
unitig_8:1104188-1104301	Cluster_1271	114	279	27.35	0	1	+	UUGCGGUAAAUGACAUUGAAUUGACAUUUU	63	0.294	N	N2	-1	96	161	3	2	6	5	6
unitig_8:1107816-1107853	Cluster_1272	38	38	3.725	0	1	+	UCCCGGCAACGGAACC	9	0.237	N	N2	-1	38	0	0	0	0	0	0
unitig_8:1132040-1132070	Cluster_1273	31	46	4.509	0	0	-	UGCCUGGCUCCCUGUAUGCCG	32	0.217	21	N12	-1	7	0	4	34	1	0	0
unitig_8:1140303-1140386	Cluster_1274	84	56	5.49	0	0.929	+	GCCGGGGCC	20	0.179	N	N2	-1	56	0	0	0	0	0	0
unitig_8:1148961-1149090	Cluster_1275	130	30	2.941	0	0.967	+	AUGAGUCCUCUCCU	19	0.267	N	N2	-1	28	0	0	0	1	1	0
unitig_8:1149234-1149602	Cluster_1276	369	138	13.528	0	0.659	0	AUCCAAGAAGUUUCAGGCUGC	30	0.442	21	N5	1.2	19	3	5	76	31	2	2
unitig_8:1152286-1152410	Cluster_1277	125	21	2.059	0	0.524	0	AGAAGACACUUACAGAAUUCGAUC	3	0.857	N	N2	-1	1	4	1	0	0	3	12
unitig_8:1175082-1175995	Cluster_1278	914	90	8.823	0	0.022	-	AAGUCUGAUGCUUCGGUUUUCAG	10	0.844	N	N2	-1	14	49	2	2	5	10	8
unitig_8:1176216-1176860	Cluster_1279	645	46	4.509	0	0.065	-	CCUCGGCG	3	0.913	N	N2	-1	14	25	1	2	2	1	1
unitig_8:1181519-1181535	Cluster_1280	17	34	3.333	0	0	-	CUCUCACCCCACCA	18	0.206	N	N2	-1	34	0	0	0	0	0	0
unitig_8:1185516-1185532	Cluster_1281	17	62	6.078	0	0.968	+	CCCGUGG	60	0.032	N	N2	-1	62	0	0	0	0	0	0
unitig_8:1189609-1189862	Cluster_1282	254	469	45.975	0	0.994	+	GUCGCUUUGGCCGA	92	0.186	N	N2	-1	243	67	9	5	20	39	86
unitig_8:1201189-1201195	Cluster_1283	7	47	4.607	0	1	+	CCCGUGG	47	0.021	N	N2	-1	47	0	0	0	0	0	0
unitig_8:1208920-1208926	Cluster_1284	7	48	4.705	0	1	+	CCCGUGG	47	0.042	N	N2	-1	48	0	0	0	0	0	0
unitig_8:1216637-1216700	Cluster_1285	64	126	12.352	0	0.992	+	GGCGGGCC	119	0.024	N	N2	-1	126	0	0	0	0	0	0
unitig_8:1223866-1223891	Cluster_1286	26	42	4.117	0	0	-	GGCGGGCC	40	0.071	N	N2	-1	42	0	0	0	0	0	0
unitig_8:1233600-1233618	Cluster_1287	19	697	68.326	0	0.968	+	ACUGCAUAGUGGACGC	397	0.014	N	N2	-1	697	0	0	0	0	0	0
unitig_8:1234094-1234297	Cluster_1288	204	113	11.077	0	0.982	+	GGCGGGCC	98	0.08	N	N2	-1	112	1	0	0	0	0	0
unitig_8:1234384-1235209	Cluster_1289	826	44	4.313	0	0.864	+	CCCACGGACUGCGCCA	4	0.909	N	N2	-1	18	18	2	2	3	0	1
unitig_8:1244576-1244582	Cluster_1290	7	51	4.999	0	1	+	CCCGUGG	51	0.02	N	N2	-1	51	0	0	0	0	0	0
unitig_8:1255980-1255994	Cluster_1291	15	133	13.038	0	1	+	ACGCCAGGAUG	85	0.098	N	N2	-1	133	0	0	0	0	0	0
unitig_8:1262518-1262638	Cluster_1292	121	739	72.443	0	0.997	+	UCUCAACAAGAGCACCA	657	0.022	N	N2	-1	738	1	0	0	0	0	0
unitig_8:1270555-1271261	Cluster_1293	707	25	2.451	0	0.88	+	CAGCUCGCUUUGACU	1	1	N	N2	-1	6	15	0	3	0	0	1
unitig_8:1283624-1283670	Cluster_1294	47	51	4.999	0	1	+	CCCGUGG	49	0.059	N	N2	-1	51	0	0	0	0	0	0
unitig_8:1289620-1290211	Cluster_1295	592	39	3.823	0	0.282	0	CCCGUGG	20	0.308	N	N2	-1	34	4	0	0	1	0	0
unitig_8:1294807-1295121	Cluster_1296	315	1964	192.528	0	0.018	-	GCACCAGUGGUCUAGUGGUAGAAUAGUACCCU	204	0.21	N	N2	-1	284	1528	34	31	26	38	23
unitig_8:1304494-1305087	Cluster_1297	594	32	3.137	0	0.281	0	GAUCUCUCAGCCGACGCCA	3	0.938	N	N2	-1	15	1	0	10	5	1	0
unitig_8:1307062-1307069	Cluster_1298	8	25	2.451	0	0	-	CCCGUGG	24	0.08	N	N2	-1	25	0	0	0	0	0	0
unitig_8:1330993-1331096	Cluster_1299	104	118	11.567	0	0.966	+	GGCGGGCC	101	0.076	N	N2	-1	115	2	0	0	0	0	1
unitig_8:1334751-1334808	Cluster_1300	58	21	2.059	0	0.048	-	CCCGUGG	19	0.143	N	N2	-1	21	0	0	0	0	0	0
unitig_8:1336063-1336118	Cluster_1301	56	23	2.255	0	0.957	+	GCAGAACCUUACCAUCCU	14	0.261	N	N2	-1	22	1	0	0	0	0	0
unitig_8:1355161-1355302	Cluster_1302	142	44	4.313	0	0.864	+	CCCGGCUGGUCCACCA	35	0.205	N	N2	-1	44	0	0	0	0	0	0
unitig_8:1359830-1359842	Cluster_1303	13	20	1.961	0	1	+	UCUCUUUCAAGGA	19	0.1	N	N2	-1	20	0	0	0	0	0	0
unitig_8:1361383-1361537	Cluster_1304	155	32	3.137	0	0.062	-	CCCCUACCUGGCCCCA	16	0.25	N	N2	-1	30	2	0	0	0	0	0
unitig_8:1371187-1371314	Cluster_1305	128	21	2.059	0	0.952	+	GUUCCCGGCUGCUCCACCA	9	0.381	N	N2	-1	20	1	0	0	0	0	0
unitig_8:1381776-1381866	Cluster_1306	91	96986	9507.4	0	1	+	UCGGACCAGGCUUCAUUCCCC	94104	0.002	21	Y	-1	1110	7	575	95091	197	3	3
unitig_8:1402956-1403020	Cluster_1307	65	187	18.331	0	1	+	CCCGGCAACUGAACCA	124	0.07	N	N2	-1	185	2	0	0	0	0	0
unitig_8:1406856-1407194	Cluster_1308	339	32	3.137	0	0.219	0	CCCGUGG	22	0.344	N	N2	-1	27	5	0	0	0	0	0
unitig_8:1412434-1412528	Cluster_1309	95	47	4.607	0	0.979	+	CCCGUGG	45	0.064	N	N2	-1	46	1	0	0	0	0	0
unitig_8:1415383-1415466	Cluster_1310	84	21	2.059	0	0.048	-	AUCCUGCAGGUCGGACCA	18	0.19	N	N2	-1	21	0	0	0	0	0	0
unitig_8:1422097-1422115	Cluster_1311	19	29	2.843	0	0	-	UCCUCGUCUUCCAUCCCU	24	0.138	N	N2	-1	29	0	0	0	0	0	0
unitig_8:1430320-1430790	Cluster_1312	471	174	17.057	0	0.425	0	UUUCCCGGCUCCACCA	55	0.483	N	N2	-1	63	4	5	10	5	18	69
unitig_8:1432462-1432638	Cluster_1313	177	79	7.744	0	0.987	+	CCCGUGG	74	0.076	N	N2	-1	77	0	0	0	2	0	0
unitig_8:1446601-1446614	Cluster_1314	14	36	3.529	0	1	+	GUGGGCGCCA	31	0.111	N	N2	-1	36	0	0	0	0	0	0
unitig_8:1446716-1447243	Cluster_1315	528	36	3.529	0	0.833	+	GAAGAGGUGAUCGGAAUCGUUGAUGGCGAGUAACGUAGUGCAGGUUUGCAG	1	1	N	N2	-1	12	14	2	2	5	1	0
unitig_8:1449540-1449587	Cluster_1316	48	51	4.999	0	1	+	CCCGUGG	50	0.039	N	N2	-1	50	1	0	0	0	0	0
unitig_8:1449794-1449977	Cluster_1317	184	24	2.353	0	0.875	+	CCGGGCC	9	0.417	N	N2	-1	22	1	1	0	0	0	0
unitig_8:1456971-1456977	Cluster_1318	7	50	4.901	0	1	+	CCCGUGG	50	0.02	N	N2	-1	50	0	0	0	0	0	0
unitig_8:1494924-1495022	Cluster_1319	99	324	31.761	0	1	+	GUCGUUGUAGUAUAGUGGU	49	0.309	N	N2	-1	118	164	7	3	9	11	12
unitig_8:1496055-1496073	Cluster_1320	19	82	8.038	0	1	+	UCUCCCGGCAAACCCACCA	59	0.061	N	N2	-1	82	0	0	0	0	0	0
unitig_8:1499812-1500265	Cluster_1321	454	97	9.509	0	0.835	+	UCGCGAUCGCCA	22	0.227	N	N2	-1	95	1	0	1	0	0	0
unitig_8:1517284-1517449	Cluster_1322	166	662	64.895	0	0.002	-	AUCGAAACCUGGCUCUGAUACCA	180	0.23	N	N2	-1	46	351	2	12	41	204	6
unitig_8:1519002-1519134	Cluster_1323	133	23	2.255	0	0.957	+	CCCACUGGGCGUGCCA	17	0.261	N	N2	-1	23	0	0	0	0	0	0
unitig_8:1535490-1535587	Cluster_1324	98	34	3.333	0	0.118	-	CGACGCCAGGAUACC	15	0.206	N	N2	-1	34	0	0	0	0	0	0
unitig_8:1537221-1537659	Cluster_1325	439	21	2.059	0	0.095	-	AAAGCAAAAGAUGGGUUGAU	2	0.952	N	N2	-1	4	11	3	0	1	1	1
unitig_8:1537746-1537928	Cluster_1326	183	52	5.097	0	0	-	GCUCCCACUGUCGUCGCCA	26	0.192	N	N2	-1	49	2	0	0	0	1	0
unitig_8:1541089-1543643	Cluster_1327	2555	186	18.233	0	0.247	0	UUACCCGCGGACCUGUGAAGC	4	0.849	21	N5	1	4	12	4	82	22	11	51
unitig_8:1546981-1546987	Cluster_1328	7	22	2.157	0	0	-	CCCGUGG	22	0.045	N	N2	-1	22	0	0	0	0	0	0
unitig_8:1550131-1550565	Cluster_1329	435	23	2.255	0	0.522	0	GAUGAGCUUCAACAAUUUUGUGGU	2	0.87	N	N2	-1	1	4	0	0	2	3	13
unitig_8:1572549-1572625	Cluster_1330	77	49	4.803	0	0.061	-	GGCGGGCC	41	0.122	N	N2	-1	49	0	0	0	0	0	0
unitig_8:1580214-1580246	Cluster_1331	33	49	4.803	0	0.082	-	CCUGGGCCUCACGC	38	0.122	N	N2	-1	49	0	0	0	0	0	0
unitig_8:1583871-1583995	Cluster_1332	125	24	2.353	0	0.917	+	AUAAGGGGCUCCA	16	0.333	N	N2	-1	23	0	1	0	0	0	0
unitig_8:1588932-1589000	Cluster_1333	69	24	2.353	0	0.958	+	CCCCGCCGGACCACCA	12	0.5	N	N2	-1	24	0	0	0	0	0	0
unitig_8:1598078-1598172	Cluster_1334	95	621	60.876	0	0	-	CGUGAUGAUGAUCCUUUUGUCUGAGGGAA	159	0.064	N	N2	-1	2	619	0	0	0	0	0
unitig_8:1609452-1609458	Cluster_1335	7	33	3.235	0	1	+	CCCGUGG	33	0.03	N	N2	-1	33	0	0	0	0	0	0
unitig_8:1610753-1610840	Cluster_1336	88	68	6.666	0	0.015	-	CUCCGAUUCGACA	48	0.191	N	N2	-1	67	1	0	0	0	0	0
unitig_8:1627702-1627708	Cluster_1337	7	60	5.882	0	1	+	CCCGUGG	60	0.017	N	N2	-1	60	0	0	0	0	0	0
unitig_8:1631014-1631222	Cluster_1338	209	24	2.353	0	0.167	-	AGGAUCAUUG	4	0.708	N	N2	-1	19	2	0	2	0	0	1
unitig_8:1631461-1632506	Cluster_1339	1046	84	8.234	0	0.131	-	GCCGGGGC	8	0.833	N	N2	-1	34	27	5	4	4	7	3
unitig_8:1632704-1633403	Cluster_1340	700	44	4.313	0	0.091	-	ACACUGACGGGUUGUACAGCGCAAGGCAGACCG	2	0.955	N	N2	-1	9	27	0	1	1	2	4
unitig_8:1633601-1633734	Cluster_1341	134	25	2.451	0	0.04	-	UUUCUAUGGUACUCCAAUUUUCAAUCCUCAG	2	0.88	N	N2	-1	3	17	1	1	0	2	1
unitig_8:1634351-1635046	Cluster_1342	696	30	2.941	0	0	-	CCGGGCC	3	0.933	N	N2	-1	10	17	1	0	0	0	2
unitig_8:1656755-1656877	Cluster_1343	123	49	4.803	0	0.898	+	CCCGUGG	43	0.082	N	N2	-1	48	0	0	1	0	0	0
unitig_8:1658247-1658387	Cluster_1344	141	20	1.961	0	0.15	-	CCCGUGG	12	0.4	N	N2	-1	15	0	3	2	0	0	0
unitig_8:1661880-1661954	Cluster_1345	75	37	3.627	0	0.973	+	UGACAGAAGAGAGCGAGCACC	11	0.216	21	N11	-1	1	3	9	24	0	0	0
unitig_8:1674782-1674835	Cluster_1346	54	47	4.607	0	0.957	+	CCCGUGG	43	0.085	N	N2	-1	46	1	0	0	0	0	0
unitig_8:1688276-1688412	Cluster_1347	137	90	8.823	0	0	-	UUGAUACUGAAACAUGUGGAAGUGACAGCC	13	0.422	N	N2	-1	0	75	1	6	3	2	3
unitig_8:1692931-1693013	Cluster_1348	83	53	5.196	0	1	+	CCCGUGG	50	0.057	N	N2	-1	52	1	0	0	0	0	0
unitig_8:1696978-1696989	Cluster_1349	12	57	5.588	0	0	-	AAUGCCCCCCA	49	0.053	N	N2	-1	57	0	0	0	0	0	0
unitig_8:1703475-1703523	Cluster_1350	49	40	3.921	0	1	+	CCCGUGG	38	0.075	N	N2	-1	40	0	0	0	0	0	0
unitig_8:1733382-1733389	Cluster_1351	8	53	5.196	0	1	+	CCCGUGG	50	0.057	N	N2	-1	53	0	0	0	0	0	0
unitig_8:1737199-1737218	Cluster_1352	20	143	14.018	0	0	-	CGUCCGUCGUGGAGAGGGA	136	0.021	N	N2	-1	137	0	6	0	0	0	0
unitig_8:1744960-1745115	Cluster_1353	156	58	5.686	0	0.19	-	GGCGGGCC	38	0.103	N	N2	-1	58	0	0	0	0	0	0
unitig_8:1746636-1746667	Cluster_1354	32	52	5.097	0	0.981	+	CCCGUGG	51	0.038	N	N2	-1	51	1	0	0	0	0	0
unitig_8:1761444-1761533	Cluster_1355	90	30	2.941	0	1	+	GCCGGGGC	20	0.1	N	N2	-1	30	0	0	0	0	0	0
unitig_8:1780840-1780846	Cluster_1356	7	49	4.803	0	1	+	CCCGUGG	49	0.02	N	N2	-1	49	0	0	0	0	0	0
unitig_8:1786808-1786841	Cluster_1357	34	52	5.097	0	0.981	+	CCCGUGG	51	0.038	N	N2	-1	51	0	1	0	0	0	0
unitig_8:1793142-1793175	Cluster_1358	34	189	18.527	0	1	+	CUGUCUGAGCACG	170	0.042	N	N2	-1	189	0	0	0	0	0	0
unitig_8:1818457-1818669	Cluster_1359	213	47	4.607	0	0.979	+	CCCGUGG	43	0.106	N	N2	-1	45	2	0	0	0	0	0
unitig_8:1820737-1820762	Cluster_1360	26	67	6.568	0	1	+	UUCCUUGACAUCUUGAGUAAAG	28	0.119	23	N11	-1	0	3	0	0	28	35	1
unitig_8:1869288-1869312	Cluster_1361	25	77	7.548	0	1	+	UGCGGCUGAUCACCUCCU	69	0.052	N	N2	-1	77	0	0	0	0	0	0
unitig_8:1875870-1875880	Cluster_1362	11	71	6.96	0	1	+	CACGUUCCCG	42	0.056	N	N2	-1	71	0	0	0	0	0	0
unitig_8:1885994-1886008	Cluster_1363	15	23	2.255	0	1	+	ACUAUCUGAGGCCG	12	0.304	N	N2	-1	23	0	0	0	0	0	0
unitig_8:1887128-1887496	Cluster_1364	369	141	13.822	0	0.553	0	UUUUCAGAUUGUGUCGUACGAUC	12	0.674	24	N5	1.2	3	12	0	6	5	35	80
unitig_8:1911902-1912058	Cluster_1365	157	27	2.647	0	0.296	0	AUCCCGAUCGCCCGCU	6	0.481	N	N2	-1	24	3	0	0	0	0	0
unitig_8:1917473-1918220	Cluster_1366	748	61	5.98	0	0.738	0	UUUCCCUCACCUCCACCA	6	0.902	N	N2	-1	24	17	2	10	5	1	2
unitig_8:1918378-1918840	Cluster_1367	463	30	2.941	0	0.767	0	CGGAGAACUGUAGGGAU	3	0.9	N	N2	-1	15	9	1	0	3	1	1
unitig_8:1920299-1920581	Cluster_1368	283	21	2.059	0	0.667	0	CCGGGCC	5	0.619	N	N2	-1	20	0	0	1	0	0	0
unitig_8:1928062-1928151	Cluster_1369	90	28	2.745	0	0.964	+	CCGGUAGGGCCCUCCA	12	0.25	N	N2	-1	28	0	0	0	0	0	0
unitig_8:1929397-1929412	Cluster_1370	16	67	6.568	0	1	+	CCCACUCUCAACACCA	64	0.03	N	N2	-1	67	0	0	0	0	0	0
unitig_8:1930410-1930723	Cluster_1371	314	18055	1769.91	0	0	-	CGAGGUGACGAUGACUUUCAUCAGGUCUGUCAAUCCACUGAUUGAUUGUGA	7835	0.051	N	N2	-1	1581	15491	99	118	154	492	120
unitig_8:1930811-1930895	Cluster_1372	85	1531	150.082	0	0	-	UGCUAUGAUGAUCUCAGAUUAACGUGCCGGAGGCGC	437	0.178	N	N2	-1	201	1167	29	26	33	37	38
unitig_8:1936464-1936868	Cluster_1373	405	52	5.097	0	0.096	-	GGCGGGCC	38	0.231	N	N2	-1	51	1	0	0	0	0	0
unitig_8:1943976-1943994	Cluster_1374	19	201	19.704	0	0	-	CCCGGCAACCGAACCA	148	0.035	N	N2	-1	201	0	0	0	0	0	0
unitig_8:1944652-1944974	Cluster_1375	323	906	88.814	0	0.013	-	UUCGCGCGGCCCCUGCC	87	0.357	N	N2	-1	528	233	10	24	36	55	20
unitig_8:1971856-1972899	Cluster_1376	1044	67	6.568	0	0.194	-	UGAAGAAAGCUGAGGCAGAGCC	2	0.985	N	N2	-1	18	29	0	6	11	2	1
unitig_8:1981722-1981731	Cluster_1377	10	47	4.607	0	1	+	CCCGUGG	29	0.085	N	N2	-1	47	0	0	0	0	0	0
unitig_8:1991263-1991306	Cluster_1378	44	40	3.921	0	1	+	CGGCCGGUC	12	0.175	N	N2	-1	40	0	0	0	0	0	0
unitig_8:1995919-1996013	Cluster_1379	95	141	13.822	0	1	+	GGCGGGCC	134	0.035	N	N2	-1	140	1	0	0	0	0	0
unitig_8:1998891-1998905	Cluster_1380	15	54	5.294	0	1	+	CCUGGCCGUCACGC	50	0.056	N	N2	-1	54	0	0	0	0	0	0
unitig_8:2001515-2001531	Cluster_1381	17	103	10.097	0	0	-	CAUGGGCCACCA	98	0.039	N	N2	-1	103	0	0	0	0	0	0
unitig_8:2010091-2010109	Cluster_1382	19	444	43.525	0	0	-	AUUCCCGGCAACUGAACCA	443	0.005	N	N2	-1	444	0	0	0	0	0	0
unitig_8:2011024-2011048	Cluster_1383	25	55	5.392	0	1	+	UUUCCUUAUAUCAAACUCCAG	39	0.164	21	N11	-1	0	0	2	40	10	2	1
unitig_8:2036388-2036784	Cluster_1384	397	32	3.137	0	0.969	+	UGGACCUCCUGAGCCAUCCCGAGUACAUUGAGCAA	1	1	N	N2	-1	6	19	0	1	1	2	3
unitig_8:2067438-2067709	Cluster_1385	272	29	2.843	0	0.345	0	GGGGGCC	7	0.345	N	N2	-1	28	0	0	0	1	0	0
unitig_8:2080778-2080784	Cluster_1386	7	58	5.686	0	1	+	CCCGUGG	58	0.017	N	N2	-1	58	0	0	0	0	0	0
unitig_8:2095894-2096386	Cluster_1387	493	25	2.451	0	0.48	0	CCCGUGG	8	0.68	N	N2	-1	13	5	0	4	3	0	0
unitig_8:2099873-2099891	Cluster_1388	19	76	7.45	0	0	-	UUUCCCCCCACCUCCACCA	54	0.105	N	N2	-1	76	0	0	0	0	0	0
unitig_8:2111108-2111114	Cluster_1389	7	21	2.059	0	0	-	CCCGUGG	21	0.048	N	N2	-1	21	0	0	0	0	0	0
unitig_8:2123931-2123964	Cluster_1390	34	53	5.196	0	1	+	CCCGUGG	34	0.17	N	N2	-1	53	0	0	0	0	0	0
unitig_8:2132076-2132135	Cluster_1391	60	35	3.431	0	1	+	CCCGUGG	32	0.086	N	N2	-1	35	0	0	0	0	0	0
unitig_8:2132463-2132573	Cluster_1392	111	478	46.858	0	0.998	+	AAACUUUCAACAA	271	0.021	N	N2	-1	473	1	4	0	0	0	0
unitig_8:2138051-2138057	Cluster_1393	7	66	6.47	0	1	+	CCCGUGG	66	0.015	N	N2	-1	66	0	0	0	0	0	0
unitig_8:2139575-2139798	Cluster_1394	224	26	2.549	0	0.269	0	CCCGUGG	16	0.346	N	N2	-1	24	2	0	0	0	0	0
unitig_8:2141012-2141150	Cluster_1395	139	206	20.194	0	0.005	-	GAGGGUGAUGACAAGAUUGAUAGUCUGAGC	127	0.117	N	N2	-1	1	203	0	1	1	0	0
unitig_8:2142359-2142365	Cluster_1396	7	49	4.803	0	1	+	CCCGUGG	49	0.02	N	N2	-1	49	0	0	0	0	0	0
unitig_8:2148673-2148687	Cluster_1397	15	28	2.745	0	1	+	AUUGCUCUCCU	18	0.143	N	N2	-1	28	0	0	0	0	0	0
unitig_8:2151065-2151170	Cluster_1398	106	24	2.353	0	0.917	+	UCAACUCUCUGUGCUCCGC	14	0.333	N	N2	-1	23	1	0	0	0	0	0
unitig_8:2151252-2151380	Cluster_1399	129	28	2.745	0	0.821	+	GCCGGGGC	22	0.25	N	N2	-1	23	4	0	0	0	1	0
unitig_8:2157418-2157424	Cluster_1400	7	35	3.431	0	1	+	CCCGUGG	35	0.029	N	N2	-1	35	0	0	0	0	0	0
unitig_8:2157726-2157738	Cluster_1401	13	42	4.117	0	1	+	UAAGAGGACUCU	32	0.119	N	N2	-1	42	0	0	0	0	0	0
unitig_8:2168608-2168899	Cluster_1402	292	38	3.725	0	0.132	-	CCCGUGG	33	0.158	N	N2	-1	36	1	1	0	0	0	0
unitig_8:2186497-2186513	Cluster_1403	17	109	10.685	0	1	+	GGCGGGCC	106	0.037	N	N2	-1	109	0	0	0	0	0	0
unitig_8:2200834-2200855	Cluster_1404	22	97	9.509	0	0.99	+	GGCGGGCC	88	0.062	N	N2	-1	97	0	0	0	0	0	0
unitig_8:2203302-2204446	Cluster_1405	1145	76	7.45	0	0.592	0	AGGAUGUGGGACUCCC	5	0.842	N	N2	-1	21	3	3	30	14	2	3
unitig_8:2205000-2205605	Cluster_1406	606	71	6.96	0	0.535	0	GCGGCGUGCCCAGAACCC	7	0.775	N	N2	-1	27	6	0	28	8	1	1
unitig_8:2207343-2207401	Cluster_1407	59	135	13.234	0	0.089	-	UUGCUGCAUGAAACUUAUUAAG	55	0.193	N	N2	-1	22	20	2	0	56	26	9
unitig_8:2209450-2209462	Cluster_1408	13	63	6.176	0	1	+	CCCGUGG	61	0.048	N	N2	-1	63	0	0	0	0	0	0
unitig_8:2214040-2214174	Cluster_1409	135	52	5.097	0	0.981	+	UUCCCCAACGGCGCCA	14	0.25	N	N2	-1	52	0	0	0	0	0	0
unitig_8:2219727-2219742	Cluster_1410	16	25	2.451	0	1	+	UGUGGUCGCCA	13	0.12	N	N2	-1	25	0	0	0	0	0	0
unitig_8:2227094-2227774	Cluster_1411	681	110	10.783	0	0.1	-	UUUCAGCUUGGCGGAUCUGAGCCACC	2	0.973	N	N2	-1	22	59	0	9	7	7	6
unitig_8:2227860-2228074	Cluster_1412	215	45	4.411	0	0.044	-	AGCCAACCACCAGAAGAGACUUACAGACAGACCU	2	0.956	N	N2	-1	6	30	0	2	0	3	4
unitig_8:2241951-2242088	Cluster_1413	138	393	38.525	0	0	-	GGGCAUUUGGUCUAGUGGUAUGAUUCUCGCUU	61	0.356	N	N2	-1	22	351	6	3	2	5	4
unitig_8:2247797-2247818	Cluster_1414	22	30	2.941	0	0.967	+	CCCGUGG	28	0.1	N	N2	-1	30	0	0	0	0	0	0
unitig_8:2259903-2260754	Cluster_1415	852	120	11.763	0	0.633	0	ACGGAUGAGGAUCUGCAGUGAAGC	7	0.875	24	N5	0.6	7	12	9	9	7	22	54
unitig_8:2263687-2263717	Cluster_1416	31	33	3.235	0	1	+	GCUUGCUGAUUGUUGCUAAUUGCAG	15	0.182	N	N2	-1	0	24	0	0	0	0	9
unitig_8:2266919-2267444	Cluster_1417	526	23	2.255	0	0.783	0	GACGGAGUACUGUGGGAGACGGAGCU	2	0.913	N	N2	-1	10	11	0	0	1	1	0
unitig_8:2267530-2267969	Cluster_1418	440	27	2.647	0	0.333	0	GAAGUCCUCCAUCCCU	10	0.63	N	N2	-1	19	2	1	2	1	2	0
unitig_8:2271811-2271831	Cluster_1419	21	50	4.901	0	1	+	UUCCCCCAACGGCGCCA	26	0.16	N	N2	-1	49	0	0	1	0	0	0
unitig_8:2273072-2273485	Cluster_1420	414	49	4.803	0	0.143	-	UGAAGACGAGGAAUCAGGCCU	2	0.98	N	N2	-1	8	23	2	7	5	1	3
unitig_8:2279477-2279496	Cluster_1421	20	29	2.843	0	1	+	CCCGUGG	26	0.138	N	N2	-1	29	0	0	0	0	0	0
unitig_8:2288656-2288668	Cluster_1422	13	25	2.451	0	1	+	GCUGGCGGGGGC	22	0.12	N	N2	-1	25	0	0	0	0	0	0
unitig_8:2298236-2298243	Cluster_1423	8	34	3.333	0	1	+	CCCGUGG	33	0.059	N	N2	-1	34	0	0	0	0	0	0
unitig_8:2303333-2303364	Cluster_1424	32	186	18.233	0	1	+	GUACCCCCCAUCUCCACCA	136	0.054	N	N2	-1	170	0	16	0	0	0	0
unitig_8:2306015-2306271	Cluster_1425	257	117	11.469	0	0.966	+	GGCGGGCC	102	0.094	N	N2	-1	117	0	0	0	0	0	0
unitig_8:2308413-2308515	Cluster_1426	103	505	49.504	0	0.002	-	CUACAGAGCGUGCCA	477	0.022	N	N2	-1	503	0	0	2	0	0	0
unitig_8:2317900-2318197	Cluster_1427	298	22	2.157	0	0.136	-	GCUGGCGGCA	2	0.818	N	N2	-1	11	6	0	0	2	3	0
unitig_8:2349831-2349837	Cluster_1428	7	57	5.588	0	1	+	CCCGUGG	57	0.018	N	N2	-1	57	0	0	0	0	0	0
unitig_8:2350121-2350153	Cluster_1429	33	58	5.686	0	0.897	+	CCCGUGG	49	0.069	N	N2	-1	58	0	0	0	0	0	0
unitig_8:2350531-2350665	Cluster_1430	135	21	2.059	0	0.048	-	UCUCCCGGCAAACCACCA	10	0.333	N	N2	-1	20	1	0	0	0	0	0
unitig_8:2383795-2384062	Cluster_1431	268	21	2.059	0	0.857	+	GUUCCUGCGGUCAGAC	5	0.667	N	N2	-1	19	1	0	1	0	0	0
unitig_8:2389950-2390051	Cluster_1432	102	23	2.255	0	0.957	+	GUCUGGUGGCUC	15	0.174	N	N2	-1	23	0	0	0	0	0	0
unitig_8:2390984-2391001	Cluster_1433	18	51	4.999	0	0	-	GGCGGGCC	40	0.098	N	N2	-1	51	0	0	0	0	0	0
unitig_8:2408252-2408467	Cluster_1434	216	42	4.117	0	0.024	-	GGCGGGCC	35	0.143	N	N2	-1	41	1	0	0	0	0	0
unitig_8:2429597-2430167	Cluster_1435	571	176	17.253	0	0.5	0	AACCACGGAGCUGUCGAAACUCG	9	0.688	N	N2	-1	10	30	3	8	9	20	96
unitig_8:2432702-2433920	Cluster_1436	1219	118	11.567	0	0.051	-	GCGGAGAUUAUCGGAACUUUCGUCCU	3	0.915	N	N2	-1	31	62	3	3	9	6	4
unitig_8:2442171-2442177	Cluster_1437	7	52	5.097	0	1	+	CCCGUGG	52	0.019	N	N2	-1	52	0	0	0	0	0	0
unitig_8:2445384-2445477	Cluster_1438	94	382	37.447	0	0.997	+	GGGUCCAUAGCUCAGUGGUAGAGCAAUUGACUG	66	0.343	N	N2	-1	59	261	10	10	11	7	24
unitig_8:2457211-2457346	Cluster_1439	136	37	3.627	0	1	+	CGUGAAAUUGUUGAAAGG	12	0.27	N	N2	-1	30	0	2	5	0	0	0
unitig_8:2459934-2459947	Cluster_1440	14	58	5.686	0	1	+	AGUGCUCUCCU	57	0.034	N	N2	-1	58	0	0	0	0	0	0
unitig_8:2468915-2469021	Cluster_1441	107	47	4.607	0	1	+	CCCGUGG	38	0.106	N	N2	-1	47	0	0	0	0	0	0
unitig_8:2477711-2477800	Cluster_1442	90	27	2.647	0	0.074	-	CCCGUGG	23	0.185	N	N2	-1	27	0	0	0	0	0	0
unitig_8:2480815-2481047	Cluster_1443	233	33	3.235	0	0.606	0	UCAGCGGCCCGUAGAACGAGC	5	0.636	21	N6	0.3	1	0	1	28	3	0	0
unitig_8:2485486-2485759	Cluster_1444	274	2112	207.036	0	0.935	+	UCUCCUGUGCUCUGGAUCUUCCU	312	0.185	21	N11	-1	52	141	41	737	529	464	148
unitig_8:2485854-2486263	Cluster_1445	410	1128	110.576	0	0.836	+	UUGAAUAUACAAACAGGGACG	105	0.337	21	N5	-1	39	175	20	527	253	55	59
unitig_8:2498046-2498237	Cluster_1446	192	43	4.215	0	0.884	+	ACCGAACCGUAAUCAGAACCGAUCA	5	0.744	N	N2	-1	1	14	0	2	1	4	21
unitig_8:2514903-2514935	Cluster_1447	33	40	3.921	0	0.4	0	UGAUUGAGCCGCGCCAAUAUC	20	0.25	N	N2	-1	16	1	1	22	0	0	0
unitig_8:2558011-2558492	Cluster_1448	482	20	1.961	0	0.3	0	UCCUGAGCUCU	2	0.9	N	N2	-1	11	7	0	0	0	0	2
unitig_8:2577613-2577708	Cluster_1449	96	245	24.017	0	0	-	UUCCUUAACUUUGAAAG	50	0.139	N	N2	-1	163	40	20	14	7	0	1
unitig_8:2591577-2591640	Cluster_1450	64	38	3.725	0	0.816	+	GGCGCGGCU	13	0.237	N	N2	-1	38	0	0	0	0	0	0
unitig_8:2594604-2594701	Cluster_1451	98	20	1.961	0	0.9	+	CUCACCCCACCA	10	0.35	N	N2	-1	19	1	0	0	0	0	0
unitig_8:2598985-2598997	Cluster_1452	13	25	2.451	0	1	+	AUAGUGCUCUCCU	20	0.16	N	N2	-1	25	0	0	0	0	0	0
unitig_8:2603574-2603670	Cluster_1453	97	324	31.761	0	0	-	CCCCGCGAGAGUUCGAAUCUCUCAGGCGACGCCA	42	0.188	N	N2	-1	115	112	4	9	11	25	48
unitig_8:2607889-2607897	Cluster_1454	9	61	5.98	0	1	+	CCCGUGG	54	0.049	N	N2	-1	61	0	0	0	0	0	0
unitig_8:2614254-2614335	Cluster_1455	82	20	1.961	0	0.3	0	CUCGGAAUCCCCCCCA	7	0.35	N	N2	-1	20	0	0	0	0	0	0
unitig_8:2617893-2617970	Cluster_1456	78	119	11.665	0	0.992	+	GUUCCCGUGG	62	0.034	N	N2	-1	119	0	0	0	0	0	0
unitig_8:2623558-2623572	Cluster_1457	15	157	15.39	0	0.994	+	GGCGGGCC	152	0.019	N	N2	-1	157	0	0	0	0	0	0
unitig_8:2650601-2650633	Cluster_1458	33	22	2.157	0	1	+	UUCUUUCACGUCCGGUUCACCA	10	0.455	N	N2	-1	9	0	0	1	12	0	0
unitig_8:2664303-2664404	Cluster_1459	102	34	3.333	0	0.647	0	CUGCUGGAUCACCUCCU	14	0.294	N	N2	-1	34	0	0	0	0	0	0
unitig_8:2665258-2665358	Cluster_1460	101	79	7.744	0	1	+	GCAAGUCGAGCGGGCA	46	0.152	N	N2	-1	78	0	0	1	0	0	0
unitig_8:2667258-2667267	Cluster_1461	10	46	4.509	0	0	-	GGCGGGCC	41	0.087	N	N2	-1	46	0	0	0	0	0	0
unitig_8:2679332-2679396	Cluster_1462	65	23	2.255	0	0.957	+	UCCCAUACGGCGCCA	19	0.174	N	N2	-1	23	0	0	0	0	0	0
unitig_8:2690034-2690386	Cluster_1463	353	76	7.45	0	0.632	0	AUGGACCUUUUCAUUUAAACCUCG	26	0.605	24	N5	3.4	0	5	0	6	3	6	56
unitig_8:2690473-2690709	Cluster_1464	237	36	3.529	0	0.417	0	AAGGUAGAUCUGCCAAGUUGGGCC	3	0.722	24	N6	0.1	2	3	0	5	2	2	22
unitig_8:2690785-2691195	Cluster_1465	411	48	4.705	0	0.271	0	AAUUGUAGGUACCGUGAUUAGAGA	11	0.729	24	N5	0.4	1	4	2	1	3	5	32
unitig_8:2691951-2693903	Cluster_1466	1953	513	50.289	0	0.526	0	UGUGCUGUACGAAUCCUCUAGUGA	16	0.655	24	N5	5.2	6	51	16	36	28	50	326
unitig_8:2695031-2695155	Cluster_1467	125	44	4.313	0	0.977	+	GCCGGGGC	26	0.182	N	N2	-1	44	0	0	0	0	0	0
unitig_8:2702878-2702928	Cluster_1468	51	76	7.45	0	0.921	+	CCCGUGG	57	0.132	N	N2	-1	76	0	0	0	0	0	0
unitig_8:2704266-2704273	Cluster_1469	8	28	2.745	0	1	+	CCCGUGG	25	0.143	N	N2	-1	28	0	0	0	0	0	0
unitig_8:2713300-2715596	Cluster_1470	2297	253	24.801	0	0.451	0	AAAUACCAGAGGUCGUGCUAGAUC	21	0.806	24	N5	2.8	7	30	3	23	11	36	143
unitig_8:2715720-2716347	Cluster_1471	628	39	3.823	0	0.564	0	AAUGAUCAAAUUCAUGAACCUUGG	3	0.846	24	N5	0.2	2	2	0	2	3	6	24
unitig_8:2716465-2717004	Cluster_1472	540	77	7.548	0	0.831	+	CCCGUGG	35	0.481	N	N2	-1	36	9	3	3	0	2	24
unitig_8:2737349-2737460	Cluster_1473	112	75	7.352	0	0.88	+	CCCGUGG	59	0.173	N	N2	-1	75	0	0	0	0	0	0
unitig_8:2740916-2740959	Cluster_1474	44	268	26.272	0	0	-	CCCACAGACGGCGCCA	257	0.022	N	N2	-1	268	0	0	0	0	0	0
unitig_8:2758559-2759052	Cluster_1475	494	25	2.451	0	0.48	0	UUUCUUUACUAGUGUGUUCUUUGA	1	1	24	N3	0.1	1	4	1	0	2	2	15
unitig_8:2765684-2765972	Cluster_1476	289	44	4.313	0	0.614	0	AUGAGAUCAACUUGGAUGAAAAUU	5	0.841	N	N2	-1	0	13	2	1	3	6	19
unitig_8:2766416-2768320	Cluster_1477	1905	138	13.528	0	0.587	0	AUAUAAACUUUGUAUCCCUUGGUA	9	0.841	24	N5	0.7	11	16	2	8	5	12	84
unitig_8:2768402-2769071	Cluster_1478	670	58	5.686	0	0.672	0	GUCAAGAUGGCC	5	0.862	N	N2	-1	7	5	2	7	5	4	28
unitig_8:2769209-2770037	Cluster_1479	829	99	9.705	0	0.687	0	AAGAAUGACUGAAAACCUAAUUUA	22	0.687	24	N5	1.7	0	14	4	3	1	13	64
unitig_8:2778401-2778420	Cluster_1480	20	133	13.038	0	0	-	ACUCCGCUUAUCUCCACCA	130	0.023	N	N2	-1	131	0	2	0	0	0	0
unitig_8:2778532-2778715	Cluster_1481	184	23	2.255	0	0.043	-	AGUGCUCUCCU	18	0.261	N	N2	-1	20	3	0	0	0	0	0
unitig_8:2796487-2796951	Cluster_1482	465	21	2.059	0	0.905	+	AAAAUUCCAGACUCUGAAAAGAUU	3	0.905	24	N5	-1	1	0	1	1	2	1	15
unitig_8:2822110-2823395	Cluster_1483	1286	215	21.076	0	0.307	0	CUCACCGCACCA	29	0.66	N	N2	-1	94	16	5	34	51	9	6
unitig_8:2823913-2824327	Cluster_1484	415	33	3.235	0	0.394	0	UUGGACUUACGCUAUCUUUUGG	2	0.97	22	N5	0.2	2	3	2	9	15	1	1
unitig_8:2826004-2830132	Cluster_1485	4129	690	67.64	0	0.535	0	AGACUGUGCUCCCAAGAUUAUACU	73	0.699	24	N5	7.9	17	55	13	39	36	66	464
unitig_8:2840523-2840653	Cluster_1486	131	23	2.255	0	0.087	-	CCCGUGG	18	0.261	N	N2	-1	21	2	0	0	0	0	0
unitig_8:2858591-2859399	Cluster_1487	809	53	5.196	0	0.415	0	AAUUUUUAGUCAAGGUCCAUUACU	4	0.811	24	N5	0.2	1	9	0	1	2	2	38
unitig_8:2859639-2859891	Cluster_1488	253	31	3.039	0	0.258	0	AGGAGACUGACACUGGUCAAGACU	9	0.71	24	N6	0.8	1	5	0	1	0	3	21
unitig_8:2861799-2862399	Cluster_1489	601	22	2.157	0	0.545	0	CAGCAUUUUGUGCAACCGCACUGC	1	1	N	N2	-1	6	1	0	2	2	1	10
unitig_8:2863408-2863732	Cluster_1490	325	23	2.255	0	0.565	0	GCGGGCC	3	0.87	N	N2	-1	8	1	1	0	1	1	11
unitig_8:2863970-2864855	Cluster_1491	886	88	8.627	0	0.352	0	AUUAUGUCCAACCUUGUAGAAGUU	15	0.716	24	N5	0.9	2	7	5	2	1	14	57
unitig_8:2865277-2865669	Cluster_1492	393	30	2.941	0	0.567	0	AUACCAGAUAAUAUACGAUUGUAU	4	0.867	24	N5	0.2	0	2	1	0	1	4	22
unitig_8:2867634-2867641	Cluster_1493	8	136	13.332	0	1	+	GGCGGGCC	130	0.015	N	N2	-1	136	0	0	0	0	0	0
unitig_8:2887338-2887351	Cluster_1494	14	34	3.333	0	1	+	CCCGUGG	33	0.059	N	N2	-1	34	0	0	0	0	0	0
unitig_8:2893819-2893935	Cluster_1495	117	54	5.294	0	0.019	-	GGCGGGCC	49	0.093	N	N2	-1	54	0	0	0	0	0	0
unitig_8:2895032-2895050	Cluster_1496	19	45	4.411	0	1	+	AUCCGGGUGUCGCCUCCA	26	0.178	N	N2	-1	45	0	0	0	0	0	0
unitig_8:2900787-2900887	Cluster_1497	101	23	2.255	0	1	+	CCCGCCAGUCCCGCCA	16	0.174	N	N2	-1	23	0	0	0	0	0	0
unitig_8:2905179-2905277	Cluster_1498	99	3108	304.673	0	1	+	GGGGAUGUAGCUCAGA	939	0.079	N	N2	-1	1455	698	215	69	49	520	102
unitig_8:2908165-2908743	Cluster_1499	579	56	5.49	0	0.411	0	AUACCGCUGCUAUCAGAUCUUUGA	3	0.929	24	N5	0.3	2	7	2	6	3	7	29
unitig_8:2922429-2922477	Cluster_1500	49	48	4.705	0	0.979	+	CCCGUGG	47	0.042	N	N2	-1	48	0	0	0	0	0	0
unitig_8:2926209-2926226	Cluster_1501	18	73	7.156	0	0	-	CCCACUCUCAACACCA	70	0.055	N	N2	-1	73	0	0	0	0	0	0
unitig_8:2939049-2939254	Cluster_1502	206	64	6.274	0	0.234	0	UUGAGAUGUCGAUGAAUAAAAUAU	15	0.531	24	N6	1.1	1	2	0	1	1	11	48
unitig_8:2940051-2940613	Cluster_1503	563	69	6.764	0	0.29	0	AUGUAUAACUACUUGGCAUAGAAA	11	0.754	24	N5	0.5	4	5	3	1	2	4	50
unitig_8:2940690-2941402	Cluster_1504	713	40	3.921	0	0.575	0	UCCAUUUCAUUGUAGACUAAUGAU	2	0.875	24	N5	0.3	2	5	0	2	1	6	24
unitig_8:2942293-2942615	Cluster_1505	323	34	3.333	0	0.5	0	UUAGAAUUGAGUGUAGAUAUAUA	6	0.706	24	N5	0.2	0	1	0	0	1	11	21
unitig_8:2943171-2945868	Cluster_1506	2698	573	56.17	0	0.429	0	AUCUGAACCGAAUUCCACUCUAAU	27	0.707	24	N5	2.6	16	49	19	33	40	54	362
unitig_8:2976584-2977108	Cluster_1507	525	87	8.528	0	0.287	0	GAUCACUAAUAAUCGGUUGGGCCU	9	0.736	24	N5	3.4	5	9	0	7	4	15	47
unitig_8:2999593-2999599	Cluster_1508	7	35	3.431	0	1	+	CCCGUGG	34	0.057	N	N2	-1	35	0	0	0	0	0	0
unitig_8:3002799-3002846	Cluster_1509	48	49	4.803	0	0.02	-	GGCGGGCC	38	0.122	N	N2	-1	47	0	0	1	1	0	0
unitig_8:3006070-3006085	Cluster_1510	16	43	4.215	0	0	-	GGCGGGCC	40	0.07	N	N2	-1	43	0	0	0	0	0	0
unitig_8:3013956-3014097	Cluster_1511	142	30	2.941	0	0.867	+	ACCGGGCGACAGAACAAUCUUUAU	7	0.6	N	N2	-1	9	5	2	1	1	0	12
unitig_8:3024904-3024985	Cluster_1512	82	28	2.745	0	0.929	+	AUUCCCGGCUCGUGCACCA	14	0.25	N	N2	-1	28	0	0	0	0	0	0
unitig_8:3035828-3036289	Cluster_1513	462	127	12.45	0	0.677	0	UUGGACUCGGGGAGAAGGCACUCC	10	0.724	24	N5	0.8	5	5	2	14	7	13	81
unitig_8:3036399-3038428	Cluster_1514	2030	1182	115.87	0	0.524	0	AAGACAGCAGAACAAGUUCACACU	68	0.585	24	N5	15	25	107	17	85	62	123	763
unitig_8:3039374-3039913	Cluster_1515	540	34	3.333	0	0.441	0	AUGAAAAUCGACACAGAAGGGUGU	3	0.882	24	N5	0.3	2	4	1	1	3	5	18
unitig_8:3070970-3070987	Cluster_1516	18	53	5.196	0	1	+	CCCGUGG	43	0.113	N	N2	-1	53	0	0	0	0	0	0
unitig_8:3071907-3072237	Cluster_1517	331	1368	134.103	0	0.997	+	AACCUGGCUCUGAUACCA	336	0.036	N	N2	-1	897	3	20	140	83	218	7
unitig_8:3079146-3079155	Cluster_1518	10	50	4.901	0	0.02	-	GGCGGGCC	39	0.1	N	N2	-1	50	0	0	0	0	0	0
unitig_8:3080695-3080762	Cluster_1519	68	57	5.588	0	1	+	CCCGUGG	45	0.158	N	N2	-1	56	0	1	0	0	0	0
unitig_8:3085889-3085895	Cluster_1520	7	21	2.059	0	0	-	CCCGUGG	21	0.048	N	N2	-1	21	0	0	0	0	0	0
unitig_8:3088801-3089136	Cluster_1521	336	254	24.899	0	0.024	-	GUGGUCGUGCCGGA	30	0.449	N	N2	-1	143	72	6	4	5	16	8
unitig_8:3098025-3098108	Cluster_1522	84	64	6.274	0	0.047	-	AUUAGUGCUCUCCU	57	0.109	N	N2	-1	64	0	0	0	0	0	0
unitig_8:3099439-3100374	Cluster_1523	936	71	6.96	0	0.592	0	AGUAGGUACCA	4	0.761	N	N2	-1	10	5	1	6	4	3	42
unitig_8:3100477-3102983	Cluster_1524	2507	169	16.567	0	0.521	0	AUAGAUUUGAAUGGACUAAUGCCU	6	0.822	24	N5	1.4	11	11	7	11	12	15	102
unitig_8:3117383-3117850	Cluster_1525	468	21	2.059	0	0.667	0	AGAGAUACUUGUAGCAUGCAUACC	6	0.762	24	N5	0.1	1	2	0	1	1	2	14
unitig_8:3118695-3118821	Cluster_1526	127	35	3.431	0	0.229	0	GUCAGACGACAGAUCGACAUCUGU	16	0.343	24	N6	0.4	0	4	1	1	0	1	28
unitig_8:3127908-3127926	Cluster_1527	19	227	22.252	0	1	+	CCCCACGGUGGGCGCCA	142	0.137	N	N2	-1	227	0	0	0	0	0	0
unitig_8:3128056-3128463	Cluster_1528	408	37	3.627	0	0.432	0	AUGGCCAUACUUGUCAGAUUUCUGAUA	2	0.973	N	N2	-1	2	6	0	8	6	2	13
unitig_8:3133536-3133835	Cluster_1529	300	20	1.961	0	0.65	0	AUCUCGCUUUUCAGAUAUCGGCCG	1	1	24	N3	0.5	1	2	0	2	0	2	13
unitig_8:3143773-3144305	Cluster_1530	533	298	29.213	0	0.963	+	CCCCACGGUGGGCGCCA	162	0.218	N	N2	-1	264	3	0	4	4	8	15
unitig_8:3144695-3144837	Cluster_1531	143	24	2.353	0	0.875	+	AAAGAAAAAAGAACAUCUAGCAGA	11	0.458	24	N11	-1	1	2	0	1	0	1	19
unitig_8:3149618-3149631	Cluster_1532	14	97	9.509	0	1	+	CGCAUCUCCACCA	75	0.062	N	N2	-1	97	0	0	0	0	0	0
unitig_8:3155788-3155820	Cluster_1533	33	112	10.979	0	0	-	UGCCUUAACUCCACUGGUUGUAG	29	0.179	N	N2	-1	1	32	0	0	0	30	49
unitig_8:3166198-3166224	Cluster_1534	27	98	9.607	0	0	-	CUGACUAAUUCAUCUGUUCUGAAG	45	0.092	N	N2	-1	16	26	6	3	1	1	45
unitig_8:3176156-3176666	Cluster_1535	511	62	6.078	0	0.226	0	AUGCAAAAUUGUGAGAAUCUAGAA	10	0.774	N	N2	-1	3	12	1	7	2	4	33
unitig_8:3192340-3193186	Cluster_1536	847	145	14.214	0	0.759	0	AAAACACCCAACGCAUCUCAGCUG	39	0.517	24	N5	5.5	1	15	2	8	4	6	109
unitig_8:3205891-3206111	Cluster_1537	221	26	2.549	0	0.615	0	UUGACCGAGGCAUGUUAGGAGACU	3	0.692	24	N6	0.1	0	3	1	1	0	3	18
unitig_8:3206265-3206975	Cluster_1538	711	51	4.999	0	0.863	+	AAAAAACCGUGACAUUUUGUAGAA	3	0.863	N	N2	-1	4	10	2	2	3	11	19
unitig_8:3211611-3213790	Cluster_1539	2180	169	16.567	0	0.586	0	AUGGUUAGAACCUGUGGCACCAAA	6	0.858	24	N5	1.8	5	18	4	6	8	31	97
unitig_8:3239224-3239438	Cluster_1540	215	23	2.255	0	0.696	0	AGUGUCAGAGCAGAACCACGAGAA	2	0.87	24	N6	0.2	0	4	0	2	3	2	12
unitig_8:3239906-3240528	Cluster_1541	623	59	5.784	0	0.61	0	AAAACUCCCUGCAUUCGACACCCA	3	0.881	24	N5	0.2	0	5	2	2	2	4	44
unitig_8:3240798-3241793	Cluster_1542	996	83	8.136	0	0.53	0	AAUGAUCCGUCCAAUACUCAACAU	4	0.867	24	N5	0.4	4	11	1	6	13	3	45
unitig_8:3241889-3242275	Cluster_1543	387	21	2.059	0	0.762	0	AGAUGAUAUAUUGAACUUUGGACC	3	0.857	24	N5	0.2	2	0	0	3	0	2	14
unitig_8:3247115-3247608	Cluster_1544	494	90	8.823	0	0.489	0	AAAACUACGGAGCUGUCGGAGCUC	5	0.778	24	N5	0.4	1	12	3	5	4	11	54
unitig_8:3267301-3267495	Cluster_1545	195	58	5.686	0	0.603	0	CACGAGAUAGUGGAAUAAAGUCAC	6	0.759	24	N6	0.7	1	5	3	6	0	6	37
unitig_8:3268348-3268807	Cluster_1546	460	99	9.705	0	0.626	0	CCCGUGG	36	0.576	N	N2	-1	39	4	0	11	0	11	34
unitig_8:3275366-3275446	Cluster_1547	81	21	2.059	0	0.429	0	GUUGGGUCUUAAACCUGUCAGACU	3	0.762	24	N6	0.1	0	0	0	1	1	4	15
unitig_8:3278466-3278755	Cluster_1548	290	343	33.624	0	0.012	-	GAGAAUGAUGAGGUUAAUUUGUUUGAGGCCAGAUGGCCGAUGAGGCACUU	92	0.297	N	N2	-1	32	216	11	6	11	43	24
unitig_8:3278861-3279008	Cluster_1549	148	128	12.548	0	0	-	UGAGAUGAUGAAGUAUCUUGUUUGACAGCCAAAGAUGAUGGCUUACAACA	74	0.336	N	N2	-1	3	112	2	1	2	4	4
unitig_8:3279679-3279728	Cluster_1550	50	47	4.607	0	1	+	CCCGUGG	42	0.106	N	N2	-1	47	0	0	0	0	0	0
unitig_8:3280424-3280431	Cluster_1551	8	34	3.333	0	1	+	CCCGUGG	33	0.059	N	N2	-1	34	0	0	0	0	0	0
unitig_8:3281853-3281864	Cluster_1552	12	28	2.745	0	0.929	+	GCCGGGGC	21	0.143	N	N2	-1	28	0	0	0	0	0	0
unitig_8:3282180-3282187	Cluster_1553	8	49	4.803	0	1	+	CCCGUGG	48	0.041	N	N2	-1	49	0	0	0	0	0	0
unitig_8:3292611-3293913	Cluster_1554	1303	52	5.097	0	0.442	0	UUCCAUGAUAGUCUCCUGACAUGU	2	0.904	N	N2	-1	6	8	0	5	2	6	25
unitig_8:3306354-3306862	Cluster_1555	509	35	3.431	0	0.457	0	AACAAAGAGACACGAAAAUAACCU	4	0.8	24	N5	0.6	0	3	1	3	1	2	25
unitig_8:3306981-3307237	Cluster_1556	257	41	4.019	0	0.463	0	AGAGAAUGAGAGGGGUUUUGAACA	5	0.829	24	N6	0.5	3	4	1	1	1	4	27
unitig_8:3321681-3322364	Cluster_1557	684	63	6.176	0	0.571	0	ACGUAGAUUUAUCAGAAACCAGGU	8	0.73	24	N5	1.7	2	10	1	1	0	8	41
unitig_8:3325811-3326058	Cluster_1558	248	81	7.94	0	0.741	0	AUACCCGUGUCAGAGCAGAACUUU	43	0.358	24	N6	6.4	2	7	0	2	2	3	65
unitig_8:3326219-3326571	Cluster_1559	353	26	2.549	0	0.577	0	AUGCCCUUUUGACAGUAGUAAGAC	2	0.962	24	N5	0.1	0	1	0	4	1	1	19
unitig_8:3326672-3327278	Cluster_1560	607	71	6.96	0	0.465	0	AGAUGGAUGAAGAUGGAUAUUGAU	5	0.789	24	N5	0.2	0	14	1	6	3	4	43
unitig_8:3327363-3328544	Cluster_1561	1182	112	10.979	0	0.509	0	AGAGUCACCUUUAGAAUUAGCACC	11	0.812	24	N5	1	2	13	2	6	3	16	70
unitig_8:3328634-3329113	Cluster_1562	480	103	10.097	0	0.883	+	AAAAGGAGAUGGACAAUGAAGAAU	42	0.485	24	N5	-1	0	9	0	2	3	6	83
unitig_8:3329452-3330533	Cluster_1563	1082	75	7.352	0	0.587	0	AGCAGACGAGAACUCCAUACGAUU	4	0.893	24	N5	0.4	3	7	2	9	7	7	40
unitig_8:3334111-3334275	Cluster_1564	165	203	19.9	0	0.01	-	UCGUUAUUUUCCACUGUUUU	31	0.404	N	N2	-1	62	64	37	21	10	5	4
unitig_8:3346567-3346933	Cluster_1565	367	34	3.333	0	0.412	0	ACGAGAUGGAGAGAGAAAAAGGGA	4	0.882	N	N2	-1	2	6	1	1	1	5	18
unitig_8:3347922-3348152	Cluster_1566	231	22	2.157	0	0.227	0	AUUCCUAGUUGAGACUAAAUCGAU	3	0.909	24	N6	0.2	0	4	1	1	1	1	14
unitig_8:3361835-3361928	Cluster_1567	94	62	6.078	0	1	+	CACACUGAAGCCA	58	0.081	N	N2	-1	61	1	0	0	0	0	0
unitig_8:3384744-3384927	Cluster_1568	184	58	5.686	0	0.897	+	CCCGUGG	51	0.121	N	N2	-1	57	0	0	1	0	0	0
unitig_8:3387182-3387472	Cluster_1569	291	3405	333.787	0	0.003	-	UCCCUCCGAUUCGAC	513	0.194	N	N2	-1	1315	1392	37	214	253	138	56
unitig_8:3388294-3388510	Cluster_1570	217	20	1.961	0	0.95	+	UCGCAGGAGAGAC	14	0.3	N	N2	-1	19	0	0	0	0	1	0
unitig_8:3393239-3395910	Cluster_1571	2672	1034	101.362	0	0.032	-	UUGUCGCUCCGAUUCGAA	82	0.536	N	N2	-1	474	323	69	38	57	37	36
unitig_8:3398068-3399086	Cluster_1572	1019	164	16.077	0	0.659	0	AUCUGAGAAUCUUUGACCGAGUCU	20	0.659	24	N5	1.1	3	23	1	9	8	19	101
unitig_8:3399573-3400278	Cluster_1573	706	108	10.587	0	0.63	0	UGCCUGAAGAACAUUGAAGCCAAU	8	0.731	24	N5	0.2	6	10	2	10	13	9	58
unitig_8:3407136-3407155	Cluster_1574	20	21	2.059	0	0	-	AUAAGGGGCUCCA	18	0.19	N	N2	-1	21	0	0	0	0	0	0
unitig_8:3417920-3418140	Cluster_1575	221	30	2.941	0	0.967	+	CCCAGGUCAGGC	8	0.533	N	N2	-1	26	2	0	1	1	0	0
unitig_8:3418223-3418471	Cluster_1576	249	34	3.333	0	1	+	AAAAGAGAGUCAAAGAGUGCUUGAAAUU	2	0.971	N	N2	-1	11	16	1	1	3	2	0
unitig_8:3434806-3434987	Cluster_1577	182	46	4.509	0	0.326	0	CCCGUGG	16	0.326	N	N2	-1	31	4	2	1	1	1	6
unitig_8:3437104-3437128	Cluster_1578	25	186	18.233	0	1	+	UUCCCCGGCAACGGCGCCA	71	0.14	N	N2	-1	172	0	2	12	0	0	0
unitig_8:3445412-3445644	Cluster_1579	233	25	2.451	0	0.92	+	AACACGAGAGUCUCUGACAGGCGA	8	0.64	24	N12	-1	1	2	0	4	1	0	17
unitig_8:3447618-3447625	Cluster_1580	8	56	5.49	0	1	+	CCCGUGG	55	0.036	N	N2	-1	56	0	0	0	0	0	0
unitig_8:3465601-3465692	Cluster_1581	92	64	6.274	0	1	+	CCCGUGG	63	0.031	N	N2	-1	64	0	0	0	0	0	0
unitig_8:3472741-3472832	Cluster_1582	92	31	3.039	0	0.968	+	GCCGGGGC	16	0.161	N	N2	-1	31	0	0	0	0	0	0
unitig_8:3477273-3477522	Cluster_1583	250	14822	1452.98	0	1	+	UCCGUUGUCGUCCAGCGGUUAGGAUAUCUGGCU	6503	0.048	N	N2	-1	897	13380	27	15	40	82	381
unitig_8:3488047-3488068	Cluster_1584	22	22	2.157	0	0	-	ACCAAACCCAACCAAACUCC	11	0.273	N	N2	-1	7	0	11	4	0	0	0
unitig_8:3489175-3490024	Cluster_1585	850	99	9.705	0	0.646	0	CAACAUAGGUCAUCGAAAAGAUCUCGGAGACCCACCAAAGU	8	0.828	N	N2	-1	17	57	1	7	7	2	8
unitig_8:3490154-3493005	Cluster_1586	2852	41371	4055.54	0	0.996	+	GUGCGGCUGGAUCACCUCCU	2130	0.271	N	N2	-1	11218	18483	4112	1942	1821	2014	1781
unitig_8:3493461-3494087	Cluster_1587	627	23	2.255	0	0.435	0	UGGCGUACAUGACUUGAUAUAGGC	2	0.957	24	N5	0.1	4	0	0	1	0	2	16
unitig_8:3494165-3494550	Cluster_1588	386	21	2.059	0	0.381	0	AUCCAAGCUGUUGGCUAAGGCCCU	6	0.762	24	N5	0.7	1	1	0	0	2	1	16
unitig_8:3496165-3496726	Cluster_1589	562	127	12.45	0	0.858	+	ACACCCCAGAGAAUCGUCGAGAGC	36	0.52	24	N5	-1	2	7	3	5	6	13	91
unitig_8:3496824-3497216	Cluster_1590	393	25	2.451	0	0.84	+	AAACUUGUAGAGAUGUAAAACAUA	2	0.92	24	N5	-1	1	2	0	5	0	3	14
unitig_8:3503001-3505772	Cluster_1591	2772	247	24.213	0	0.648	0	GCGGUACACGAGAGUCUCUGACAA	6	0.818	24	N5	2.8	9	35	5	18	13	42	125
unitig_8:3509794-3510304	Cluster_1592	511	21	2.059	0	0.619	0	AGGGAACUCAAUGUAUACCAGCCU	5	0.81	24	N5	0.3	1	1	1	1	1	4	12
unitig_8:3533744-3533951	Cluster_1593	208	76	7.45	0	0.947	+	ACAAAACACCGUAGAAUUCUGGAG	15	0.5	24	N11	-1	3	5	0	2	2	2	62
unitig_8:3535630-3536198	Cluster_1594	569	38	3.725	0	0.658	0	AAAUACAACGUAAAUAAUGGACCU	4	0.842	24	N5	0.1	2	3	1	0	2	3	27
unitig_8:3545616-3545622	Cluster_1595	7	56	5.49	0	1	+	CCCGUGG	56	0.018	N	N2	-1	56	0	0	0	0	0	0
unitig_8:3551555-3552666	Cluster_1596	1112	105	10.293	0	0.562	0	AUGGCGUCUCCCUGAAUUCUGAAA	18	0.714	24	N5	0.2	4	4	3	6	8	12	68
unitig_8:3553030-3553418	Cluster_1597	389	24	2.353	0	0.5	0	ACGAAUGUUGGAUAUACAUGUAGU	2	0.917	N	N2	-1	2	3	0	1	4	3	11
unitig_8:3573107-3573521	Cluster_1598	415	73	7.156	0	0.959	+	UAAGAGGACUCU	46	0.219	N	N2	-1	58	2	0	0	1	0	12
unitig_8:3577298-3577790	Cluster_1599	493	30	2.941	0	0.667	0	AACUUUCACUGAAAAACAACUCCU	3	0.867	24	N5	0.1	0	0	0	0	1	6	23
unitig_8:3581265-3581505	Cluster_1600	241	44	4.313	0	0.409	0	AACCACGGAGCUGUCGGAGCUUG	2	0.841	N	N2	-1	1	8	2	3	3	6	21
unitig_8:3581594-3582687	Cluster_1601	1094	79	7.744	0	0.468	0	AACUCCCUGUGAUCGAUACUCAUA	13	0.709	24	N5	1.5	1	5	0	6	1	8	58
unitig_8:3585805-3585812	Cluster_1602	8	53	5.196	0	0	-	GGCGGGCC	52	0.038	N	N2	-1	53	0	0	0	0	0	0
unitig_8:3592675-3592922	Cluster_1603	248	71	6.96	0	0.789	0	CAGACGGCGCCA	12	0.366	N	N2	-1	48	1	1	2	0	2	17
unitig_8:3597127-3598063	Cluster_1604	937	54	5.294	0	0.574	0	GUGUACGGAGAAUCAACUAAGGAU	2	0.907	24	N5	0.7	0	5	0	3	3	7	36
unitig_8:3600499-3600925	Cluster_1605	427	22	2.157	0	0.727	0	ACAGCCGGAACAGUAGCGCUUGAC	4	0.864	N	N2	-1	2	3	0	2	1	2	12
unitig_8:3601957-3602057	Cluster_1606	101	21	2.059	0	0.238	0	CGGUACACGGGAGUCUCUGACAGA	2	0.952	N	N2	-1	0	6	0	1	2	4	8
unitig_8:3612440-3613166	Cluster_1607	727	26	2.549	0	0.423	0	AGAACCAGUAGAACCGGGUAGACC	2	0.885	24	N5	0.3	2	3	1	1	0	3	16
unitig_8:3633377-3633421	Cluster_1608	45	38	3.725	0	0.974	+	CCCGUGG	37	0.053	N	N2	-1	37	0	0	0	0	0	1
unitig_8:3634080-3634204	Cluster_1609	125	115	11.273	0	0.983	+	CCCGGCAACGGCGCCA	29	0.174	N	N2	-1	110	0	2	0	0	0	3
unitig_8:3634691-3635329	Cluster_1610	639	46	4.509	0	0.609	0	AACACUGAGAACUGACCUACUUGU	8	0.804	24	N5	0.7	1	7	0	3	1	2	32
unitig_8:3642801-3642923	Cluster_1611	123	41	4.019	0	0.976	+	CUGAUACAGGGCUC	9	0.341	N	N2	-1	40	1	0	0	0	0	0
unitig_8:3643864-3643925	Cluster_1612	62	43	4.215	0	0.977	+	GCCGAGGGC	17	0.186	N	N2	-1	43	0	0	0	0	0	0
unitig_8:3646448-3646454	Cluster_1613	7	47	4.607	0	1	+	CCCGUGG	47	0.021	N	N2	-1	47	0	0	0	0	0	0
unitig_8:3648528-3648541	Cluster_1614	14	26	2.549	0	1	+	AACGGAACCA	21	0.115	N	N2	-1	26	0	0	0	0	0	0
unitig_8:3659487-3660138	Cluster_1615	652	57	5.588	0	0.737	0	AAUGAAUCCAAAACAUGCUAGACU	5	0.842	24	N5	0.4	5	5	0	2	2	5	38
unitig_8:3676122-3676930	Cluster_1616	809	38	3.725	0	0.842	+	AAAACCGUGACAUUUUGUAGAAGU	7	0.658	24	N5	-1	1	3	0	2	1	0	31
unitig_8:3683647-3683661	Cluster_1617	15	23	2.255	0	0	-	UAGACUUGAAC	20	0.13	N	N2	-1	23	0	0	0	0	0	0
unitig_8:3712562-3713366	Cluster_1618	805	80	7.842	0	0.725	0	ACCAACGUGAUCUUUAGUACCAUA	3	0.887	N	N2	-1	11	13	1	8	1	9	37
unitig_8:3713468-3713711	Cluster_1619	244	21	2.059	0	0.619	0	AUUCCAAAUUCGUCCUGAAAAAUC	2	0.952	24	N6	0.3	1	1	0	2	1	1	15
unitig_8:3720158-3720177	Cluster_1620	20	337	33.036	0	0	-	CCCCGCACCUCCACCA	207	0.042	N	N2	-1	336	0	1	0	0	0	0
unitig_8:3724428-3724446	Cluster_1621	19	53	5.196	0	1	+	AUCAUUGCUCUCCU	36	0.113	N	N2	-1	53	0	0	0	0	0	0
unitig_8:3724924-3725069	Cluster_1622	146	40	3.921	0	0.95	+	AACGGACCUAGAAAUUUUCAUAAC	15	0.525	24	N11	-1	2	6	0	0	1	5	26
unitig_8:3737746-3738076	Cluster_1623	331	21	2.059	0	0.667	0	AGAUUCUCGGAUAAAAUAAGAUUC	2	0.905	N	N2	-1	1	4	0	0	1	2	13
unitig_8:3738153-3738775	Cluster_1624	623	62	6.078	0	0.661	0	AAGGGACAGUGCUAUAACGGUCAC	4	0.903	24	N5	0.9	3	3	3	3	1	9	40
unitig_8:3739138-3740248	Cluster_1625	1111	85	8.332	0	0.565	0	AAACUACACUUUCUCACUAUUCUC	4	0.859	24	N5	0.8	5	10	1	5	3	12	49
unitig_8:3743854-3743955	Cluster_1626	102	37	3.627	0	0.027	-	GUUCCCGUGG	16	0.162	N	N2	-1	36	0	0	0	1	0	0
unitig_8:3746599-3747142	Cluster_1627	544	28	2.745	0	0.714	0	CGGAACACGAGAGUCUCUGACAGG	4	0.857	24	N5	0.1	2	2	1	3	2	2	16
unitig_8:3756166-3756333	Cluster_1628	168	255	24.997	0	0.996	+	CCCCACGGUGGGCGCCA	149	0.122	N	N2	-1	250	1	0	2	0	1	1
unitig_8:3758398-3758419	Cluster_1629	22	22	2.157	0	1	+	CCCUUCCUCUAUCGCCA	11	0.409	N	N2	-1	12	0	2	7	1	0	0
unitig_8:3766964-3767427	Cluster_1630	464	36	3.529	0	0.444	0	GAUCGAUGUCUGUCAGAAAUCUGA	3	0.889	24	N5	1.8	6	1	0	1	1	6	21
unitig_8:3793479-3793485	Cluster_1631	7	61	5.98	0	1	+	CCCGUGG	59	0.049	N	N2	-1	61	0	0	0	0	0	0
unitig_8:3821652-3822334	Cluster_1632	683	28	2.745	0	0.5	0	ACCUCGUUUACUCUAAACCCGAAA	2	0.893	24	N5	0.3	1	2	2	1	0	1	21
unitig_8:3822713-3823129	Cluster_1633	417	26	2.549	0	0.654	0	AAUGGAAUAUAGGCGGCACACCGC	2	0.923	24	N5	0.2	2	1	1	3	2	4	13
unitig_8:3826534-3827083	Cluster_1634	550	30	2.941	0	0.767	0	AAAAUAUUAUUUGCCUGGUAACUG	7	0.767	24	N5	0.7	0	3	0	1	2	7	17
unitig_8:3831117-3831230	Cluster_1635	114	72	7.058	0	0.972	+	CCCGUGG	45	0.097	N	N2	-1	72	0	0	0	0	0	0
unitig_8:3832869-3833039	Cluster_1636	171	21	2.059	0	0.905	+	AUUCUUGAAAGUGUGAUCUUGCCU	7	0.476	24	N11	-1	0	3	0	0	1	1	16
unitig_8:3833672-3834168	Cluster_1637	497	28	2.745	0	0.393	0	AUGCUCUUGAUUGAUGACUCACCU	3	0.893	24	N5	0.2	1	4	0	1	0	1	21
unitig_8:3835171-3837956	Cluster_1638	2786	439	43.035	0	0.451	0	AAAAGGAGAAUGAAGAGCUUUGUU	12	0.765	24	N5	2.8	16	44	6	27	28	50	268
unitig_8:3845813-3845958	Cluster_1639	146	39	3.823	0	1	+	CCCGUGG	36	0.103	N	N2	-1	39	0	0	0	0	0	0
unitig_8:3858949-3859601	Cluster_1640	653	40	3.921	0	0.575	0	GAUUUCUGACAGACGUCGAUCUGU	10	0.725	N	N2	-1	7	3	1	5	6	1	17
unitig_8:3872208-3872214	Cluster_1641	7	20	1.961	0	0	-	CCCGUGG	19	0.1	N	N2	-1	20	0	0	0	0	0	0
unitig_8:3878930-3878979	Cluster_1642	50	55	5.392	0	1	+	CCCGUGG	53	0.055	N	N2	-1	54	0	0	0	0	0	1
unitig_8:3919786-3919804	Cluster_1643	19	22	2.157	0	0.818	+	AAGAGGACUCU	14	0.273	N	N2	-1	22	0	0	0	0	0	0
unitig_8:3925040-3925058	Cluster_1644	19	41	4.019	0	0	-	GGGAGAGCUCAGACUGA	19	0.098	N	N2	-1	41	0	0	0	0	0	0
unitig_8:3944293-3944435	Cluster_1645	143	20	1.961	0	0.95	+	CCGGGCC	7	0.55	N	N2	-1	13	1	1	1	0	1	3
unitig_8:3945928-3945934	Cluster_1646	7	22	2.157	0	0	-	CCCGUGG	22	0.045	N	N2	-1	22	0	0	0	0	0	0
unitig_8:3950897-3951407	Cluster_1647	511	28	2.745	0	0.643	0	GAAGACUUGGAUCUACUCUCCU	3	0.893	N	N2	-1	2	5	1	4	5	2	9
unitig_8:3951492-3951971	Cluster_1648	480	34	3.333	0	0.853	+	UUUUAUUACUUCGACGGUUUCUGU	3	0.853	24	N5	-1	1	2	0	3	1	6	21
unitig_8:3964277-3964306	Cluster_1649	30	475	46.564	0	1	+	UAACCUGGCUCUGAUACCA	208	0.053	N	N2	-1	321	0	8	99	45	1	1
unitig_8:3968668-3969098	Cluster_1650	431	30	2.941	0	0.767	0	AAAAACAAGAAUCCGGGUAGAUCU	6	0.8	24	N5	0.5	1	4	0	1	1	3	20
unitig_8:3969196-3969219	Cluster_1651	24	188	18.429	0	0	-	UUCGUUCCCCGGCAACGGCGCCA	53	0.191	N	N2	-1	54	0	9	22	30	72	1
unitig_8:3993046-3993107	Cluster_1652	62	29	2.843	0	1	+	AGUAGCGGCACCA	11	0.276	N	N2	-1	29	0	0	0	0	0	0
unitig_8:3997004-3997771	Cluster_1653	768	50	4.901	0	0.76	0	ACGUGAGGACCAUAGUGCAACAUC	2	0.86	24	N5	0.3	0	6	0	9	1	7	27
unitig_8:3997872-3998321	Cluster_1654	450	42	4.117	0	0.548	0	AUCUUUAGAAUCUUAGGCACACCC	3	0.833	24	N5	0.3	2	2	1	6	2	3	26
unitig_8:3998694-3999381	Cluster_1655	688	33	3.235	0	0.758	0	UUUCAAAUCCAUAAACUGUAAUA	2	0.939	24	N5	0.6	0	5	0	1	1	7	19
unitig_8:4005735-4006045	Cluster_1656	311	219	21.468	0	1	+	UUAAUUCCGUUAACGAACGAGACCUCAGCCU	4	0.826	N	N2	-1	55	106	9	11	11	14	13
unitig_8:4008110-4008375	Cluster_1657	266	31	3.039	0	1	+	AAGGCACGUUAGUAUUAUUCUGAG	2	0.871	N	N2	-1	1	6	0	2	1	7	14
unitig_8:4020320-4020525	Cluster_1658	206	91	8.921	0	0.901	+	CGGAACCGGAACCGAGAUUCGCGA	7	0.681	24	N13	-1	3	13	4	9	5	5	52
unitig_8:4021072-4021182	Cluster_1659	111	42	4.117	0	0.357	0	AUCUUCUUUGGAGCCUGGACACCU	4	0.714	24	N6	0.2	1	2	2	4	3	6	24
unitig_8:4022212-4022651	Cluster_1660	440	21	2.059	0	0.381	0	AAUCAAAGAGGGUCCGGUAUAUGC	2	0.952	N	N2	-1	2	4	0	0	0	1	14
unitig_8:4024182-4024745	Cluster_1661	564	22	2.157	0	0.318	0	AAAUCAAAUAAAUAAUGGACUCGA	2	0.955	24	N5	0.1	0	2	0	4	0	1	15
unitig_8:4026361-4026713	Cluster_1662	353	38	3.725	0	0.658	0	GCACCCACAUCUAUCGUCAGCAUG	7	0.763	24	N5	0.4	0	1	1	3	1	7	25
unitig_8:4034302-4037156	Cluster_1663	2855	573	56.17	0	0.496	0	AAGAGAAACUAUAAGCUUAAACCU	17	0.757	24	N5	4.2	13	60	14	33	34	63	356
unitig_8:4037258-4037768	Cluster_1664	511	61	5.98	0	0.459	0	AUAUUCACUAAGUUCGAUGGUAGG	3	0.869	24	N5	0.6	1	9	1	5	4	7	34
unitig_8:4043482-4044050	Cluster_1665	569	33	3.235	0	0.545	0	AACUAACUCACAAGAUCUAGAUCU	4	0.818	N	N2	-1	0	9	1	0	1	1	21
unitig_8:4044235-4044543	Cluster_1666	309	24	2.353	0	0.625	0	ACAUAAGUACCGUAGAAGUGCACU	2	0.917	24	N5	0.3	0	2	0	3	0	5	14
unitig_8:4044827-4045519	Cluster_1667	693	88	8.627	0	0.443	0	AAUAGCUCCUUACUAUAUUGGACU	11	0.716	24	N5	1.2	3	7	2	5	7	7	57
unitig_8:4045939-4046444	Cluster_1668	506	45	4.411	0	0.533	0	CACAUCAAAUCUUCUAUCCGGAUU	2	0.889	N	N2	-1	4	7	0	0	0	4	30
unitig_8:4046522-4046998	Cluster_1669	477	66	6.47	0	0.47	0	AAUCAGACAUCGUUGGUAAGACA	4	0.879	24	N5	0.2	4	9	2	6	4	9	32
unitig_8:4058172-4058559	Cluster_1670	388	42	4.117	0	0.857	+	ACCGGGCAAUAGAACAAUCUUUAU	18	0.452	24	N5	-1	2	3	0	0	0	5	32
unitig_8:4059628-4059801	Cluster_1671	174	21	2.059	0	0.857	+	AACUAACUCACAAGAUCUAGGUCU	13	0.429	24	N11	-1	1	0	0	0	0	2	18
unitig_8:4063014-4063519	Cluster_1672	506	26	2.549	0	0.5	0	AAGCCACGUUAGUAUUAUUCUGAG	4	0.769	24	N5	0.2	3	2	0	0	0	0	21
unitig_8:4082534-4082852	Cluster_1673	319	21	2.059	0	0.857	+	AAAACCACGGAGCUGUCGGAGCUC	5	0.714	N	N2	-1	8	0	0	0	2	3	8
unitig_8:4090780-4091296	Cluster_1674	517	24	2.353	0	0.542	0	AUGACUUCUCUCCU	2	0.958	N	N2	-1	5	4	0	1	0	3	11
unitig_8:4120479-4121561	Cluster_1675	1083	76	7.45	0	0.711	0	AGUGGAAGAACAUGUUUUGGAACG	2	0.895	24	N5	0.3	5	4	3	5	2	13	44
unitig_8:4121770-4121789	Cluster_1676	20	89	8.725	0	0	-	UUCCCCGGCAACGGCGCCA	31	0.292	N	N2	-1	85	0	4	0	0	0	0
unitig_8:4129044-4129184	Cluster_1677	141	26	2.549	0	0.846	+	CCGGGCC	19	0.308	N	N2	-1	23	0	1	0	0	0	2
unitig_8:4131000-4131061	Cluster_1678	62	50	4.901	0	0.98	+	CCCGUGG	47	0.08	N	N2	-1	50	0	0	0	0	0	0
unitig_8:4140124-4140404	Cluster_1679	281	20	1.961	0	0.55	0	CCGAGUAGACCUAGAUCUUGUGAG	3	0.75	24	N6	0.4	2	0	2	1	0	1	14
unitig_8:4147329-4147431	Cluster_1680	103	24	2.353	0	0.958	+	AAUCCUUCCUCCCAUCCA	6	0.417	N	N2	-1	19	0	1	0	4	0	0
unitig_8:4149047-4149056	Cluster_1681	10	60	5.882	0	1	+	CCCGUGG	50	0.083	N	N2	-1	60	0	0	0	0	0	0
unitig_8:4161905-4162074	Cluster_1682	170	66	6.47	0	0.985	+	CCCGGCAACGGAACCA	51	0.152	N	N2	-1	64	0	0	0	0	0	2
unitig_8:4169041-4169120	Cluster_1683	80	43	4.215	0	0.907	+	GGCGCGGCU	15	0.279	N	N2	-1	43	0	0	0	0	0	0
unitig_8:4177368-4177746	Cluster_1684	379	22	2.157	0	0.773	0	AGAACCAGUAGAACCGGGUAGACC	4	0.864	24	N5	0.4	1	3	0	3	2	0	13
unitig_8:4183164-4183175	Cluster_1685	12	21	2.059	0	1	+	UAGCAAUGAAGA	17	0.095	N	N2	-1	21	0	0	0	0	0	0
unitig_8:4214307-4215011	Cluster_1686	705	40	3.921	0	0.75	0	CGCGGCGGCG	5	0.775	N	N2	-1	25	1	0	9	5	0	0
unitig_8:4217405-4218677	Cluster_1687	1273	49	4.803	0	0.653	0	AGAAAGAGAAUUAGGAGCCACACU	5	0.857	24	N5	0.5	4	5	1	2	0	8	29
unitig_8:4218801-4219310	Cluster_1688	510	32	3.137	0	0.375	0	ACCGGAUAUGAAUAGUGUAGUGGC	5	0.781	24	N5	0.7	1	3	2	2	0	5	19
unitig_8:4233010-4233641	Cluster_1689	632	40	3.921	0	0.425	0	AAAGGCUUACUCUAUGCACCCAAA	4	0.9	24	N5	1.3	2	5	0	5	2	3	23
unitig_8:4233803-4234106	Cluster_1690	304	20	1.961	0	0.35	0	AGCCUGAUAGGUGAAAUGCUUCUU	2	0.9	24	N5	0.2	0	2	2	0	0	1	15
unitig_8:4234763-4235277	Cluster_1691	515	22	2.157	0	0.591	0	UAAAAUUCUAAAGGUGUCGUCUU	2	0.909	24	N5	0.2	0	1	0	2	0	4	15
unitig_8:4235495-4236159	Cluster_1692	665	76	7.45	0	0.474	0	CCCCUGUUGCAUCCCU	5	0.842	24	N4	0.7	6	9	1	9	7	9	35
unitig_8:4244612-4244742	Cluster_1693	131	22	2.157	0	0.545	0	CUUGAAUUCUUGGACCGAUAAUU	2	0.955	24	N6	0.2	0	2	0	2	2	2	14
unitig_8:4245017-4245430	Cluster_1694	414	41	4.019	0	0.78	0	AUAGUAGGAACAAUUGAAUAAAAU	9	0.683	24	N5	0.7	2	6	1	1	1	6	24
unitig_8:4245513-4246124	Cluster_1695	612	35	3.431	0	0.571	0	AAGAAAACAAUUAGAACUAAUAUU	3	0.857	24	N5	0.2	0	2	1	1	6	3	22
unitig_8:4246234-4246467	Cluster_1696	234	26	2.549	0	0.462	0	AGGUGAUUAAGUGUAGCAAUUAUC	4	0.769	N	N2	-1	3	3	0	0	1	4	15
unitig_8:4246620-4247026	Cluster_1697	407	51	4.999	0	0.706	0	AUAGUUACUUUGGCCUUGGUAGUC	5	0.765	24	N5	0.4	3	1	3	3	5	8	28
unitig_8:4247105-4248308	Cluster_1698	1204	159	15.587	0	0.579	0	ACUCAGGAUCAAUGGAUAAAUAGU	7	0.742	24	N5	0.9	11	19	1	15	8	18	87
unitig_8:4256711-4257263	Cluster_1699	553	42	4.117	0	0.381	0	AGCCCUAAAUUAAAGUGUUUGACU	6	0.833	24	N5	0.2	1	7	2	4	0	2	26
unitig_8:4257368-4258985	Cluster_1700	1618	131	12.842	0	0.634	0	ACGGACAUGUGAGCUGAACUCCA	4	0.878	24	N5	0.3	8	18	3	13	2	16	71
unitig_8:4264684-4264799	Cluster_1701	116	31	3.039	0	0.548	0	AUAUCCGAUUGAAGCUUUCUCUUU	4	0.839	24	N6	0.5	0	5	0	2	2	3	19
unitig_8:4265597-4265915	Cluster_1702	319	24	2.353	0	0.833	+	AAGGAGAGUACACUGUGCACGCAU	8	0.708	N	N2	-1	0	6	0	1	0	3	14
unitig_8:4266004-4266615	Cluster_1703	612	28	2.745	0	0.893	+	AUUUCGUUAACAACUAGCUACUGU	2	0.857	N	N2	-1	2	4	1	1	1	2	17
unitig_8:4271475-4271534	Cluster_1704	60	22	2.157	0	0.682	0	AUUGGACUAGAAUGAAGAAGGUAU	7	0.591	24	N6	-1	0	2	1	1	0	1	17
unitig_8:4280067-4280228	Cluster_1705	162	44	4.313	0	0.955	+	UCCCACAGACGCCGCCA	22	0.364	N	N2	-1	38	0	0	2	0	0	4
unitig_8:4281608-4282150	Cluster_1706	543	28	2.745	0	0.429	0	AGAGGACCAGAGAAGACUGAAGAC	4	0.857	24	N5	0.1	0	5	0	4	2	3	14
unitig_8:4295818-4295978	Cluster_1707	161	22	2.157	0	0	-	GCGGCCUUAGCUCAGC	9	0.318	N	N2	-1	21	0	0	0	0	0	1
unitig_8:4298390-4298962	Cluster_1708	573	21	2.059	0	0.476	0	ACAAAACUCAAUGCCUUCAGAUCG	1	1	24	N3	0.1	0	3	0	2	1	2	13
unitig_8:4303429-4303912	Cluster_1709	484	116	11.371	0	0.879	+	CCCGGCAACGGCGCCA	19	0.328	N	N2	-1	95	1	2	3	0	0	15
unitig_8:4304487-4304715	Cluster_1710	229	44	4.313	0	0.205	0	GACCGAGGAUUGUCAGGAGACUGU	18	0.432	24	N6	2.1	0	4	2	1	0	1	36
unitig_8:4313247-4313458	Cluster_1711	212	24	2.353	0	0.167	-	AAAAGUAGAAUGAAGAGCUGUGCU	6	0.667	N	N2	-1	1	5	0	0	0	2	16
unitig_8:4313874-4314398	Cluster_1712	525	65	6.372	0	0.323	0	AUCCUGUAUCAAGAAUCUAGUUCU	4	0.815	24	N5	0.4	0	7	2	4	1	8	43
unitig_8:4315469-4315683	Cluster_1713	215	31	3.039	0	0.806	+	AUUUCGAACCGUAAUGCUGACACA	3	0.871	24	N11	-1	1	3	4	4	1	4	14
unitig_8:4316099-4316255	Cluster_1714	157	117	11.469	0	0	-	GCCGUCCUAGCUCA	13	0.615	N	N2	-1	50	49	5	2	2	4	5
unitig_8:4317601-4318811	Cluster_1715	1211	98	9.607	0	0.612	0	AUUCGAGAAUCUUUGACCGAGUCU	5	0.857	24	N5	0.3	8	6	0	5	6	16	57
unitig_8:4324870-4325151	Cluster_1716	282	24	2.353	0	0.5	0	AGAGCACCA	2	0.917	N	N2	-1	2	4	1	0	2	2	13
unitig_8:4326570-4327079	Cluster_1717	510	52	5.097	0	0.173	-	AUAAACCGUAGAACACAAAAGAGC	10	0.692	24	N5	-1	1	5	0	4	5	6	31
unitig_8:4330955-4331988	Cluster_1718	1034	135	13.234	0	0.481	0	AUCUGAGAAUCUUUGACCGAGUCU	23	0.748	24	N5	0.7	9	15	4	1	7	9	90
unitig_8:4332068-4332905	Cluster_1719	838	49	4.803	0	0.347	0	ACAAAAGAAUCAAUGGUAGGUGGU	3	0.959	24	N5	0.3	0	5	1	1	4	7	31
unitig_8:4333005-4333470	Cluster_1720	466	21	2.059	0	0.762	0	GUGAAGUAUCAACAUUAUGAUUGU	4	0.81	N	N2	-1	1	4	0	0	1	2	13
unitig_8:4341573-4341582	Cluster_1721	10	39	3.823	0	1	+	CCCGUGG	31	0.077	N	N2	-1	39	0	0	0	0	0	0
unitig_8:4358967-4359404	Cluster_1722	438	32	3.137	0	0.031	-	CCCGUGG	23	0.312	N	N2	-1	25	1	0	1	0	2	3
unitig_8:4376668-4376687	Cluster_1723	20	31	3.039	0	1	+	UUCCCGCUACCCGCUCCA	10	0.355	N	N2	-1	31	0	0	0	0	0	0
unitig_8:4379812-4379847	Cluster_1724	36	40	3.921	0	0.15	-	AACAUAUCGUUCGUUGGGACUAUA	13	0.325	24	N11	-1	0	4	1	0	0	11	24
unitig_8:4390267-4391449	Cluster_1725	1183	53	5.196	0	0.547	0	ACGGAACCCGAUCGAAUUCAAAAA	2	0.981	24	N5	0.2	4	4	1	2	4	6	32
unitig_8:4402195-4402818	Cluster_1726	624	22	2.157	0	0.591	0	CUUGAAC	1	1	N	N2	-1	3	2	0	1	2	3	11
unitig_8:4404541-4404811	Cluster_1727	271	23	2.255	0	0.739	0	UUUUACAAAUAAUAUCGUAGUUGU	2	0.957	24	N6	0.2	2	2	1	1	2	4	11
unitig_8:4413449-4413677	Cluster_1728	229	25	2.451	0	0.56	0	AAAGCGAGAUCGUAUAACAUGUA	3	0.72	24	N6	0.2	0	2	4	5	1	5	8
unitig_8:4421297-4421392	Cluster_1729	96	246	24.115	0	0.996	+	CCCCACGGUGGGCGCCA	154	0.118	N	N2	-1	242	0	0	1	2	1	0
unitig_8:4421567-4421866	Cluster_1730	300	24	2.353	0	0.208	0	AAAGCGAGAUCGUAUAGCAGGUA	5	0.75	24	N6	0.6	3	0	0	3	0	6	12
unitig_8:4429584-4429717	Cluster_1731	134	21	2.059	0	0.952	+	GCGGGCC	7	0.286	N	N2	-1	21	0	0	0	0	0	0
unitig_8:4430823-4431038	Cluster_1732	216	23	2.255	0	0.565	0	AUAUGACACAGUCUGAAAAGCAGC	5	0.739	24	N6	0.6	2	0	2	1	0	5	13
unitig_8:4432728-4432808	Cluster_1733	81	129	12.646	0	0.008	-	UUCCCCGGCAACGGCGCCA	23	0.225	N	N2	-1	100	0	6	21	1	1	0
unitig_8:4444468-4444552	Cluster_1734	85	274	26.86	0	1	+	CCCCACGGUGGGCGCCA	172	0.102	N	N2	-1	263	0	1	1	3	3	3
unitig_8:4444860-4445015	Cluster_1735	156	21	2.059	0	0.81	+	CGAAUUUCUGACACAUAUCGGCCU	4	0.714	24	N11	-1	0	3	0	2	2	1	13
unitig_8:4448928-4449213	Cluster_1736	286	69	6.764	0	0.188	-	AACCGAGCUUCAGAACUUAUUACU	41	0.275	24	N11	-1	3	2	1	0	1	1	61
unitig_8:4450310-4450360	Cluster_1737	51	44	4.313	0	1	+	CCCGUGG	43	0.045	N	N2	-1	44	0	0	0	0	0	0
unitig_8:4451680-4452117	Cluster_1738	438	21	2.059	0	0.571	0	AGAUUUUUUAUGUACUUGGGACUC	2	0.857	N	N2	-1	0	5	2	0	1	2	11
unitig_8:4454926-4454940	Cluster_1739	15	70	6.862	0	1	+	UUGGGCGUAGCCAAG	54	0.029	N	N2	-1	70	0	0	0	0	0	0
unitig_8:4455652-4456035	Cluster_1740	384	30	2.941	0	0.767	0	UCAAAUCUCGUCCACUGGAUU	2	0.967	21	N5	0.3	3	1	1	16	7	2	0
unitig_8:4457108-4457414	Cluster_1741	307	38	3.725	0	0.237	0	AGCCAGUAAGGACCAAGAACCGAC	14	0.579	24	N5	0.7	0	3	1	2	2	1	29
unitig_8:4458262-4458581	Cluster_1742	320	20	1.961	0	0.55	0	AUUCUAUCCGUAGGUAUAAUUCUA	5	0.6	24	N5	0.1	0	0	0	0	0	1	19
unitig_8:4477874-4478374	Cluster_1743	501	23	2.255	0	0.348	0	AGCAGAUGGAAACCAGAACUCUUC	4	0.826	N	N2	-1	3	4	0	1	1	0	14
unitig_8:4483238-4483717	Cluster_1744	480	27	2.647	0	0.778	0	UCGCCCAUAGCCUUCCGGACC	2	0.963	N	N2	-1	8	12	0	3	0	3	1
unitig_8:4489030-4489397	Cluster_1745	368	23	2.255	0	0.913	+	UGCUAGUAGAGAAAAACGCCU	3	0.826	24	N5	-1	3	1	0	5	0	2	12
unitig_8:4504240-4504251	Cluster_1746	12	21	2.059	0	1	+	UUGUGCCCUCCA	20	0.095	N	N2	-1	21	0	0	0	0	0	0
unitig_8:4548454-4548488	Cluster_1747	35	28	2.745	0	0.036	-	CACUCUUGACACCA	22	0.25	N	N2	-1	27	0	0	0	0	0	1
unitig_8:4551550-4552074	Cluster_1748	525	24	2.353	0	0.583	0	ACCAGGACCAAUGACUAGGAGCAA	3	0.875	N	N2	-1	1	4	0	3	1	2	13
unitig_8:4557338-4557797	Cluster_1749	460	28	2.745	0	0.607	0	AUUCCAAUGGUAUUGAGUAGACCC	2	0.964	24	N5	0.4	1	4	0	4	1	3	15
unitig_8:4568369-4568753	Cluster_1750	385	38	3.725	0	0.658	0	AAACAAAAACAGACUGGAUGAUUU	3	0.868	24	N5	0.2	0	3	2	4	4	6	19
unitig_8:4568857-4569626	Cluster_1751	770	70	6.862	0	0.4	0	AUAUGACUGAAGACAUCAUCCCGA	4	0.843	24	N5	0.5	3	6	0	5	5	11	40
unitig_8:4569782-4569970	Cluster_1752	189	24	2.353	0	0.25	0	AAACCCUGAAUUCGUCGACUUAAA	3	0.792	24	N6	0.2	0	2	0	1	4	1	16
unitig_8:4575864-4576043	Cluster_1753	180	62	6.078	0	0.177	-	AUCCCCGGCAACGGCGCCA	18	0.435	N	N2	-1	49	0	3	1	1	1	7
unitig_8:4579323-4579329	Cluster_1754	7	58	5.686	0	1	+	CCCGUGG	58	0.017	N	N2	-1	58	0	0	0	0	0	0
unitig_8:4579776-4579823	Cluster_1755	48	22	2.157	0	0.909	+	AUUGCUCUCCU	17	0.227	N	N2	-1	22	0	0	0	0	0	0
unitig_8:4584804-4585395	Cluster_1756	592	45	4.411	0	0.822	+	AUUCCAAUGGUAUUGAGUAGACCC	4	0.867	24	N5	-1	3	5	1	5	1	3	27
unitig_8:4590085-4590954	Cluster_1757	870	62	6.078	0	0.742	0	AGUAAUAAGGACUUGGCUUGAACG	3	0.903	24	N5	0.1	4	7	0	6	2	8	35
unitig_8:4604425-4605002	Cluster_1758	578	24	2.353	0	0.792	0	GAAUAUGGUACUGUGAAUUGAUGA	3	0.833	N	N2	-1	9	0	1	2	0	1	11
unitig_8:4633348-4633569	Cluster_1759	222	47	4.607	0	0.17	-	AGACACCCACUUCCGUCGUAUGGG	5	0.745	24	N11	-1	1	6	0	3	1	7	29
unitig_8:4633899-4634214	Cluster_1760	316	201	19.704	0	0.1	-	UUUCCCCGGAUGCGCACC	23	0.458	N	N2	-1	93	14	2	8	2	10	72
unitig_8:4639944-4640086	Cluster_1761	143	65	6.372	0	0.954	+	CCCGUGG	60	0.092	N	N2	-1	63	0	0	0	0	0	2
unitig_8:4649474-4649760	Cluster_1762	287	24	2.353	0	0.833	+	AACUAACUCACAAGAUCUAGGUCU	8	0.708	24	N11	-1	0	1	1	2	1	4	15
unitig_8:4666731-4666754	Cluster_1763	24	55	5.392	0	1	+	CCCGUGG	54	0.036	N	N2	-1	54	0	0	0	0	0	1
unitig_8:4669952-4670145	Cluster_1764	194	34	3.333	0	0.618	0	AACUAACUCACAAGAUCUAGGUCU	8	0.471	24	N6	0.3	0	1	0	1	2	0	30
unitig_8:4675680-4676029	Cluster_1765	350	37	3.627	0	0.243	0	AAUGAAGAACGAUGUUAUAACUGU	6	0.838	N	N2	-1	2	6	2	3	0	5	19
unitig_8:4676232-4676432	Cluster_1766	201	20	1.961	0	0.45	0	AUCUAAGAAUUUUUGAUCGAGUCU	2	0.95	24	N6	0.2	0	0	0	1	3	4	12
unitig_8:4684637-4684744	Cluster_1767	108	50	4.901	0	0.34	0	CCCUCGGCG	10	0.4	N	N2	-1	50	0	0	0	0	0	0
unitig_8:4685333-4686326	Cluster_1768	994	76	7.45	0	0.592	0	CUCUACGCCAGGAUA	5	0.816	N	N2	-1	16	2	1	9	6	7	35
unitig_8:4686511-4687254	Cluster_1769	744	42	4.117	0	0.571	0	AAGGACGUAAUAAUGACUUUAUUA	3	0.929	24	N5	0.2	3	3	2	1	4	5	24
unitig_8:4687987-4689032	Cluster_1770	1046	81	7.94	0	0.519	0	ACCAACUGCAGAAUUUCCACGAGU	15	0.716	24	N5	0.7	5	6	1	2	4	4	59
unitig_8:4689179-4689614	Cluster_1771	436	20	1.961	0	0.5	0	AGUGCAGAACCAUGGACAAGGGUACCUUAUGUCUCACCU	2	0.95	N	N2	-1	2	6	0	1	2	0	9
unitig_8:4690346-4690750	Cluster_1772	405	20	1.961	0	0.2	-	UAGAGAUAUCCCAGUCGGCCC	2	0.9	N	N2	-1	4	1	0	4	3	2	6
unitig_8:4696314-4696377	Cluster_1773	64	43	4.215	0	0.047	-	UUCUUCACGUCGGGUUCACCA	25	0.302	21	N15	-1	8	0	1	34	0	0	0
unitig_8:4704280-4704297	Cluster_1774	18	23	2.255	0	1	+	AUUCCCCUACCCGCUCCA	23	0.043	N	N2	-1	23	0	0	0	0	0	0
unitig_8:4717888-4718681	Cluster_1775	794	24	2.353	0	0.667	0	AGACUGAAGGAAUGAUGGGAAGGG	2	0.958	N	N2	-1	2	4	0	1	3	2	12
unitig_8:4719853-4720176	Cluster_1776	324	20	1.961	0	0.6	0	AGAAUCAGUAGAAUCGGAUAGACC	2	0.8	24	N5	0.4	0	2	1	1	1	5	10
unitig_8:4723081-4723141	Cluster_1777	61	31	3.039	0	0.935	+	GCCGGGGC	22	0.129	N	N2	-1	31	0	0	0	0	0	0
unitig_8:4729846-4729853	Cluster_1778	8	48	4.705	0	1	+	CCCGUGG	46	0.062	N	N2	-1	48	0	0	0	0	0	0
unitig_8:4730697-4731809	Cluster_1779	1113	96	9.411	0	0.594	0	CUUACCAACAAUGUCCGAUUGAGC	2	0.938	24	N5	0.8	7	8	6	6	2	14	53
unitig_8:4738556-4738815	Cluster_1780	260	36	3.529	0	0.917	+	AUUAGUGCUCUCCU	31	0.167	N	N2	-1	34	0	0	0	0	0	2
unitig_8:4743793-4743822	Cluster_1781	30	31	3.039	0	0.968	+	CAUGGCCCACCA	26	0.129	N	N2	-1	31	0	0	0	0	0	0
unitig_8:4755442-4755665	Cluster_1782	224	58	5.686	0	0.948	+	CCCGUGG	50	0.138	N	N2	-1	52	1	0	0	0	0	5
unitig_8:4767118-4767171	Cluster_1783	54	48	4.705	0	0.896	+	AGAAUCGGAUAGACCUAGCUCUAC	25	0.417	N	N2	-1	0	11	0	0	0	2	35
unitig_8:4780687-4780747	Cluster_1784	61	30	2.941	0	0.967	+	AAUCGACACCUGUAGAGUUCAAUC	6	0.6	24	N11	-1	1	5	0	0	2	5	17
unitig_8:4787823-4788382	Cluster_1785	560	71	6.96	0	0.183	-	CUCCACAAGAAAGAUCUCUGACAG	12	0.507	24	N5	-1	1	12	1	3	1	3	50
unitig_8:4806950-4807510	Cluster_1786	561	38	3.725	0	0.553	0	AAGAAUAAUGAGAAAGUGAAGUCU	5	0.868	24	N5	0.7	0	4	1	2	4	3	24
unitig_8:4833297-4833458	Cluster_1787	162	23	2.255	0	0.652	0	AUCAAGCAUCUAAGUUGUAAAACU	6	0.565	24	N6	0.5	1	3	0	0	0	2	17
unitig_8:4841258-4841277	Cluster_1788	20	1473	144.396	0	0	-	UCCACCACGUUCCCGUGG	857	0.007	N	N2	-1	1472	0	1	0	0	0	0
unitig_8:4853301-4853356	Cluster_1789	56	20	1.961	0	0.9	+	UCUUGCAUCCCU	15	0.3	N	N2	-1	18	0	0	0	0	1	1
unitig_8:4856828-4857336	Cluster_1790	509	20	1.961	0	0.65	0	AAGCCUAACAGUAAGUCCUGGACC	1	1	24	N3	0	0	1	0	2	1	1	15
unitig_8:4857588-4858628	Cluster_1791	1041	63	6.176	0	0.429	0	CGAUAAGGGGCUCCA	9	0.778	N	N2	-1	14	6	1	5	2	6	29
unitig_8:4865732-4865741	Cluster_1792	10	20	1.961	0	1	+	AACGGAACCA	15	0.1	N	N2	-1	20	0	0	0	0	0	0
unitig_8:4868282-4868515	Cluster_1793	234	76	7.45	0	1	+	CCCUUUUCCAAGAAGCCAACAUCA	37	0.329	N	N2	-1	1	27	2	0	1	4	41
unitig_8:4870477-4870581	Cluster_1794	105	23	2.255	0	0.652	0	UUGCGUCUAUUA	4	0.696	N	N2	-1	7	1	0	0	1	6	8
unitig_8:4870711-4872326	Cluster_1795	1616	400	39.211	0	0.393	0	AAGACUGAGAAUAAAAGAAAGAUU	40	0.675	24	N5	8	8	42	6	21	25	38	260
unitig_8:4872447-4874627	Cluster_1796	2181	541	53.033	0	0.505	0	GUUCUAAGUUGGUUGUAUCUCACU	27	0.697	24	N5	3.4	28	49	7	35	18	51	353
unitig_8:4883065-4884354	Cluster_1797	1290	172	16.861	0	0.547	0	ACGAAAACACUUGACUCUAACAUG	7	0.837	N	N2	-1	11	25	3	7	5	31	90
unitig_8:4905078-4905232	Cluster_1798	155	28	2.745	0	0.036	-	UGGAGAAGCAGGGUACGUGCA	14	0.393	N	N2	-1	5	1	0	20	2	0	0
unitig_8:4915248-4916179	Cluster_1799	932	88	8.627	0	0.67	0	AUAUGAGAAUCUUUGACCGAGUCU	17	0.75	N	N2	-1	8	12	2	3	6	15	42
unitig_8:4924615-4924654	Cluster_1800	40	46	4.509	0	0.913	+	CCCGUGG	41	0.109	N	N2	-1	46	0	0	0	0	0	0
unitig_8:4929168-4929421	Cluster_1801	254	49	4.803	0	0.306	0	AGGGGUCAUGAUGGGAUAAUGCCU	7	0.653	24	N6	0.4	1	3	2	2	2	5	34
unitig_8:4933545-4934243	Cluster_1802	699	179	17.547	0	0.838	+	UAUAGCCCUACCA	74	0.341	N	N2	-1	114	7	0	3	3	5	47
unitig_8:4935359-4936929	Cluster_1803	1571	133	13.038	0	0.556	0	AUCGAAAACAUGCUAGACUUGACA	5	0.865	24	N5	0.8	5	12	0	8	5	25	78
unitig_8:4937498-4938085	Cluster_1804	588	96	9.411	0	0.385	0	UCAUCGAACACCUUGAACGCC	10	0.812	N	N2	-1	11	16	6	49	12	1	1
unitig_8:4938435-4938443	Cluster_1805	9	26	2.549	0	0	-	CCCGUGG	23	0.077	N	N2	-1	26	0	0	0	0	0	0
unitig_8:4940269-4941384	Cluster_1806	1116	202	19.802	0	0.876	+	AUAUAACGGUCACCGAGUAGCACU	91	0.396	24	N5	-1	4	14	2	5	4	13	160
unitig_8:4941549-4941778	Cluster_1807	230	162	15.881	0	0.031	-	GGUAGACUUGAAC	101	0.068	N	N2	-1	158	0	0	0	0	1	3
unitig_8:4942707-4943818	Cluster_1808	1112	82	8.038	0	0.72	0	AAUACGAAGACUUGAAUCUACUCU	6	0.841	24	N5	0.4	5	7	1	7	2	9	51
unitig_8:4952234-4952455	Cluster_1809	222	76	7.45	0	0.961	+	CCCGUGG	66	0.132	N	N2	-1	66	2	3	0	1	1	3
unitig_8:4955145-4955518	Cluster_1810	374	22	2.157	0	0.818	+	AUCACCUCCU	14	0.409	N	N2	-1	16	0	0	0	0	1	5
unitig_8:4957447-4957812	Cluster_1811	366	62	6.078	0	0.935	+	CCCGUGG	30	0.484	N	N2	-1	41	13	1	3	2	2	0
unitig_8:4958961-4959878	Cluster_1812	918	72	7.058	0	0.556	0	AUACUGUAGUGUGCCAACAUAUGU	6	0.75	N	N2	-1	13	6	2	5	1	8	37
unitig_8:4960145-4960481	Cluster_1813	337	20	1.961	0	0.4	0	ACAUGGGACCAAUAGUAAAUUUAU	2	0.95	24	N5	0.3	2	1	0	3	1	0	13
unitig_8:4976546-4977041	Cluster_1814	496	23	2.255	0	0.739	0	CCGGGCC	4	0.783	N	N2	-1	5	5	1	2	1	1	8
unitig_8:4982854-4983335	Cluster_1815	482	25	2.451	0	0.24	0	AAAAGAACGAAAAAACCACUGAGC	3	0.84	24	N5	0.2	0	4	2	4	1	2	12
unitig_8:4990163-4991271	Cluster_1816	1109	54	5.294	0	0.63	0	AAUGACCUCGUAUCUGGACUCACU	2	0.963	24	N5	0.3	4	4	2	4	2	6	32
unitig_8:4991714-4992131	Cluster_1817	418	27	2.647	0	0.481	0	CCGGGCC	3	0.852	N	N2	-1	4	4	0	2	1	1	15
unitig_8:4992228-4992657	Cluster_1818	430	56	5.49	0	0.357	0	UAUCCCGGACUAACACCUACUGGU	14	0.661	24	N5	2.7	2	2	0	2	4	6	40
unitig_8:4992736-4993093	Cluster_1819	358	27	2.647	0	0.333	0	GUAAAGCAGAAUAUGCAGCGGACU	5	0.778	24	N5	0.2	1	3	0	2	0	1	20
unitig_8:4993899-4993988	Cluster_1820	90	20	1.961	0	0.4	0	CCCGUGG	11	0.2	N	N2	-1	20	0	0	0	0	0	0
unitig_8:4998156-4998180	Cluster_1821	25	2324	227.818	0	0	-	CCCACUUCUGACACCA	452	0.028	N	N2	-1	1731	0	95	405	84	7	2
unitig_8:5020919-5021214	Cluster_1822	296	75	7.352	0	0	-	GUCGAUGAUGAAUGCAGCUUUUUCUUGUUUCACCGCUCAAGUACGAGAAGA	23	0.387	N	N2	-1	2	70	0	1	1	0	1
unitig_8:5021321-5021423	Cluster_1823	103	72	7.058	0	0.014	-	GGCUAUGAUGAUUCUUUGU	27	0.333	N	N2	-1	29	20	12	5	3	1	2
unitig_8:5022389-5023030	Cluster_1824	642	35	3.431	0	0.429	0	UUCUUGUCGAGUAGCAAAGAGCCU	3	0.914	24	N5	0.1	2	5	1	2	3	4	18
unitig_8:5024110-5024760	Cluster_1825	651	27	2.647	0	0.667	0	AUAGUUGGAACCUCUAAAUUCACU	2	0.926	N	N2	-1	4	2	0	3	1	2	15
unitig_8:5030045-5030391	Cluster_1826	347	24	2.353	0	0.25	0	AUCUGACCGAAUCCUGACUUCUGU	3	0.917	24	N5	0.1	0	2	1	2	0	4	15
unitig_8:5034626-5034879	Cluster_1827	254	24	2.353	0	0.542	0	AUUCCAAGAUCUGCGUUUGUGGUU	3	0.833	24	N6	0.2	2	2	0	1	0	4	15
unitig_8:5042457-5042539	Cluster_1828	83	103	10.097	0	1	+	UCCUCCUGUUGCAUCCCU	57	0.194	N	N2	-1	97	0	0	4	1	0	1
unitig_8:5053251-5053880	Cluster_1829	630	20	1.961	0	0.7	0	AAGAGAAAGAAAAUCUGAAAGGAA	2	0.95	24	N5	0.1	0	1	0	2	1	1	15
unitig_8:5056270-5056660	Cluster_1830	391	34	3.333	0	0.471	0	AUGUAAUUCCGAUUGUCUAAGAUU	8	0.706	24	N5	0.6	0	3	1	1	0	8	21
unitig_8:5058044-5058608	Cluster_1831	565	39	3.823	0	0.308	0	AAAUAUACUGUUAAAAAAACUCCU	6	0.846	N	N2	-1	0	10	0	1	3	11	14
unitig_8:5085109-5085935	Cluster_1832	827	47	4.607	0	0.447	0	AAAGAAUUGAGAUGUGUGAAUGUC	2	0.936	N	N2	-1	7	7	2	2	3	4	22
unitig_8:5086029-5086573	Cluster_1833	545	47	4.607	0	0.723	0	GUUAAAUUCCUCAACACGUGGUGU	4	0.83	24	N5	0.2	2	4	2	5	1	3	30
unitig_8:5086698-5087454	Cluster_1834	757	65	6.372	0	0.4	0	AACACCCUUAGUUGAUCAUAGAGG	8	0.815	24	N5	0.3	4	2	3	6	5	6	39
unitig_8:5087559-5088083	Cluster_1835	525	33	3.235	0	0.697	0	AAGUGCCACGAAGCUCACGGACCU	5	0.848	24	N5	0.2	2	2	0	5	6	3	15
unitig_8:5089323-5090380	Cluster_1836	1058	68	6.666	0	0.529	0	UGAACACUCUUGACUUAUCAAGCU	7	0.824	N	N2	-1	3	12	0	2	0	10	41
unitig_8:5091288-5091294	Cluster_1837	7	60	5.882	0	1	+	CCCGUGG	59	0.033	N	N2	-1	60	0	0	0	0	0	0
unitig_8:5100980-5101580	Cluster_1838	601	20	1.961	0	0.55	0	AUACGAGUGAAGGAAUCUGAAGUU	3	0.8	24	N5	0.4	0	1	1	1	0	3	14
unitig_8:5101982-5102530	Cluster_1839	549	49	4.803	0	0.49	0	UACGAAAAGACUGCAAUAAGACGC	4	0.878	24	N5	0.3	2	7	1	2	1	2	34
unitig_8:5102785-5103017	Cluster_1840	233	64	6.274	0	0.875	+	AAUUCUGUGAGAUCGAUACUCGUA	24	0.469	24	N11	-1	0	5	0	2	3	4	50
unitig_8:5105030-5105124	Cluster_1841	95	61	5.98	0	0.967	+	CCCGUGG	58	0.066	N	N2	-1	61	0	0	0	0	0	0
unitig_8:5116905-5117256	Cluster_1842	352	32	3.137	0	0.406	0	ACUUAUAGAUUGUGGAUGGAAGAA	2	0.875	24	N5	0.3	1	3	0	1	1	4	22
unitig_8:5118802-5118808	Cluster_1843	7	21	2.059	0	0	-	CCCGUGG	21	0.048	N	N2	-1	21	0	0	0	0	0	0
unitig_8:5120067-5120603	Cluster_1844	537	42	4.117	0	0.738	0	AGACAGAUCUCUCCUUGGAGACUC	4	0.738	24	N5	0.2	3	2	0	1	1	5	30
unitig_8:5130041-5130260	Cluster_1845	220	21	2.059	0	0.81	+	CAGGUCGGACCA	13	0.381	N	N2	-1	13	1	0	1	1	0	5
unitig_8:5132371-5132625	Cluster_1846	255	24	2.353	0	0.417	0	AAAAAACCGUGACAUUUUGUAGAA	2	0.875	N	N2	-1	3	6	0	0	0	2	13
unitig_8:5151741-5152184	Cluster_1847	444	38	3.725	0	0.579	0	AGGACCAGGAGCAGCAGAUUUGUU	6	0.763	24	N5	0.2	5	1	0	2	1	3	26
unitig_8:5166645-5167425	Cluster_1848	781	75	7.352	0	0.507	0	CAGGUCGGACCA	12	0.733	N	N2	-1	15	11	1	3	1	11	33
unitig_8:5171052-5171798	Cluster_1849	747	34	3.333	0	0.706	0	UCGAAUGAAAACUCAAUGAAAGAU	2	0.912	24	N5	0.4	1	4	0	3	0	3	23
unitig_8:5182219-5182275	Cluster_1850	57	37	3.627	0	1	+	CGAGGUGACGAUGA	28	0.135	N	N2	-1	37	0	0	0	0	0	0
unitig_8:5186562-5186578	Cluster_1851	17	26	2.549	0	0	-	UCUCGACGCCAGGAUA	16	0.269	N	N2	-1	26	0	0	0	0	0	0
unitig_8:5189790-5189891	Cluster_1852	102	30171	2957.62	0	1	+	UCGGACCAGGCUUCAUUCCUC	25999	0.006	21	Y	-1	1006	7	1084	27409	619	34	12
unitig_8:5206905-5207151	Cluster_1853	247	34	3.333	0	0.765	0	AACUAAUUCACAAGAUCUAGGUCU	7	0.647	24	N6	0.1	1	4	0	1	2	5	21
unitig_8:5207309-5207755	Cluster_1854	447	27	2.647	0	0.444	0	UCUGUUUCCAAGGAUUAUUACUCU	2	0.963	N	N2	-1	2	4	1	4	1	5	10
unitig_8:5241011-5241268	Cluster_1855	258	26	2.549	0	1	+	UUACCCCCAUCUCCACCA	21	0.231	N	N2	-1	25	1	0	0	0	0	0
unitig_8:5242496-5242514	Cluster_1856	19	70	6.862	0	1	+	UUACCCCCAUCUCCACCA	69	0.029	N	N2	-1	70	0	0	0	0	0	0
unitig_8:5245886-5246814	Cluster_1857	929	77	7.548	0	0.766	0	ACCGGGCGACAGAACAAUCUUUAU	12	0.662	24	N5	1	2	9	2	4	4	5	51
unitig_8:5248799-5249464	Cluster_1858	666	21	2.059	0	0.667	0	AUAAGACACAAUGAAACCUCAAGU	1	1	24	N3	0.1	0	4	0	1	2	1	13
unitig_8:5250802-5250815	Cluster_1859	14	56	5.49	0	1	+	AGUGCUCUCCU	46	0.107	N	N2	-1	56	0	0	0	0	0	0
unitig_8:5254205-5254644	Cluster_1860	440	28	2.745	0	0.429	0	AGGUGCUUGAGGUCAAUCUGAAAU	4	0.857	N	N2	-1	1	6	1	0	1	9	10
unitig_8:5258761-5259036	Cluster_1861	276	21	2.059	0	0.333	0	AAGAGUUUGUAGCAAUAAUUGAGC	3	0.857	24	N6	0.3	0	4	0	0	0	3	14
unitig_8:5271781-5271787	Cluster_1862	7	53	5.196	0	1	+	CCCGUGG	52	0.038	N	N2	-1	53	0	0	0	0	0	0
unitig_8:5277296-5277627	Cluster_1863	332	28	2.745	0	0.964	+	CGUUUCCCCCACCUCCACCA	11	0.536	N	N2	-1	16	0	12	0	0	0	0
unitig_8:5281756-5282313	Cluster_1864	558	24	2.353	0	0.375	0	ACAAUUUCGAAUAACAGUAGGCCU	2	0.958	N	N2	-1	3	3	0	2	0	1	15
unitig_8:5290844-5290856	Cluster_1865	13	29	2.843	0	1	+	AUCUGACGCCU	15	0.172	N	N2	-1	29	0	0	0	0	0	0
unitig_8:5300733-5300799	Cluster_1866	67	60	5.882	0	0.967	+	CCCGUGG	56	0.083	N	N2	-1	58	2	0	0	0	0	0
unitig_8:5304132-5304238	Cluster_1867	107	141	13.822	0	0.986	+	GGCGGGCC	127	0.064	N	N2	-1	139	1	0	1	0	0	0
unitig_8:5307446-5307970	Cluster_1868	525	51	4.999	0	0.569	0	AUCGUAGCACCUAUAUUUGUCACC	7	0.667	24	N5	0.4	2	4	1	3	0	6	35
unitig_8:5308052-5308201	Cluster_1869	150	60	5.882	0	0.383	0	AUGUAGACACCGACUCAAAUGAGG	7	0.7	N	N2	-1	3	15	0	5	1	3	33
unitig_8:5311865-5311882	Cluster_1870	18	25	2.451	0	0	-	UGCCUGAGCGUCACC	16	0.16	N	N2	-1	25	0	0	0	0	0	0
unitig_8:5319540-5320351	Cluster_1871	812	33	3.235	0	0.091	-	UGUACCUCGGAGGGUGAUGAGAUGA	2	0.97	N	N2	-1	12	16	1	0	2	2	0
unitig_8:5321937-5322419	Cluster_1872	483	32	3.137	0	0.562	0	GAGGAUAAUAGAAUCGGAUAGACU	8	0.719	24	N5	0.4	0	0	1	4	1	1	25
unitig_8:5327035-5327093	Cluster_1873	59	64	6.274	0	0.922	+	CCCGUGG	59	0.094	N	N2	-1	59	4	0	0	1	0	0
unitig_8:5330866-5330885	Cluster_1874	20	28	2.745	0	1	+	UCCUCCUUGCAUCCCU	12	0.214	N	N2	-1	24	0	4	0	0	0	0
unitig_8:5338858-5340223	Cluster_1875	1366	84	8.234	0	0.726	0	AUUGUAGAUCAUCCAAUGUAGCAU	5	0.81	24	N5	0.5	2	9	1	10	1	6	55
unitig_8:5341132-5341863	Cluster_1876	732	27	2.647	0	0.481	0	GUACCGACCUGUUCCAGUAAUGGA	1	1	24	N3	0.1	3	1	1	3	1	4	14
unitig_8:5342161-5342561	Cluster_1877	401	104	10.195	0	0.817	+	AUUCUAUGUAGGUAUUACUCUAUU	54	0.423	24	N5	-1	1	3	0	7	3	6	84
unitig_8:5342694-5343128	Cluster_1878	435	25	2.451	0	0.32	0	AUAUUACCGGAUUUUUAAUGCACU	4	0.84	24	N5	0.3	0	2	1	1	0	4	17
unitig_8:5343210-5343511	Cluster_1879	302	35	3.431	0	0.6	0	AAUAUGGAAAUAAAGGAUGACACU	4	0.771	24	N5	0.5	1	2	1	3	2	1	25
unitig_8:5365206-5365295	Cluster_1880	90	30	2.941	0	0.9	+	AGAAGACGGAAAAACCAUGGAGCU	7	0.767	24	N11	-1	0	5	0	3	1	4	17
unitig_8:5381618-5382092	Cluster_1881	475	22	2.157	0	0.636	0	AAGGAGCCAGAUAUGAACAGUGUA	6	0.682	24	N5	0.1	1	2	0	1	2	0	16
unitig_8:5394552-5394757	Cluster_1882	206	20	1.961	0	0.75	0	AAACGUCGACAGAAUAUCUGAUCA	2	0.9	24	N6	0.7	0	3	0	1	0	3	13
unitig_8:5395458-5395833	Cluster_1883	376	23	2.255	0	0.478	0	AUAGUUGGAAUCUCUAAAUUCACU	3	0.87	24	N5	0.2	0	2	0	1	0	2	18
unitig_8:5400897-5401415	Cluster_1884	519	56	5.49	0	0.25	0	AUACCUUAGGACAAAAAUAAACUU	24	0.554	24	N5	4.6	1	6	1	1	2	6	39
unitig_8:5402267-5403341	Cluster_1885	1075	137	13.43	0	0.482	0	AUAUACCAAGUAACCGUCGAAAGU	10	0.81	24	N5	0.6	0	12	4	15	9	15	82
unitig_8:5403454-5403960	Cluster_1886	507	61	5.98	0	0.574	0	ACGAGAUUGGUUCGUUGAAGAAUA	8	0.738	24	N5	0.2	1	5	0	3	5	10	37
unitig_8:5404035-5404393	Cluster_1887	359	40	3.921	0	0.4	0	UACUCGGAUGUGGGUCACCAUA	5	0.875	24	N5	0.3	1	3	1	3	6	7	19
unitig_8:5405322-5406133	Cluster_1888	812	81	7.94	0	0.457	0	AAAAAGCAACAGUUGGAUAGUCAC	4	0.864	24	N5	0.6	3	9	2	6	3	10	48
unitig_8:5418833-5418845	Cluster_1889	13	20	1.961	0	1	+	UAGUAGGUACCA	11	0.25	N	N2	-1	20	0	0	0	0	0	0
unitig_8:5434961-5434989	Cluster_1890	29	129	12.646	0	0.992	+	UCCCUUAUCUCCACCA	99	0.101	N	N2	-1	128	0	0	1	0	0	0
unitig_8:5439471-5439558	Cluster_1891	88	73	7.156	0	0.027	-	CCCCUCAACUCCACCA	34	0.219	N	N2	-1	57	0	15	1	0	0	0
unitig_8:5446828-5446920	Cluster_1892	93	29	2.843	0	0.897	+	CGCUUAUCUCCACCA	22	0.276	N	N2	-1	29	0	0	0	0	0	0
unitig_8:5449363-5449594	Cluster_1893	232	63	6.176	0	0.333	0	AAAGAAUAAAAGAUUGAACUCUCU	18	0.587	24	N6	1.5	2	5	0	2	1	6	47
unitig_8:5450560-5452784	Cluster_1894	2225	296	29.016	0	0.493	0	AAAAACACUGUAAGAAAAUUGAAG	26	0.618	N	N2	-1	35	27	6	17	8	30	173
unitig_8:5452880-5453479	Cluster_1895	600	53	5.196	0	0.396	0	AUUGAUAUUUUGCCUCUGUAGAGU	3	0.906	24	N5	0.3	2	7	1	7	4	3	29
unitig_8:5457094-5457101	Cluster_1896	8	46	4.509	0	1	+	CCCGUGG	45	0.043	N	N2	-1	46	0	0	0	0	0	0
unitig_8:5466459-5466476	Cluster_1897	18	98	9.607	0	0	-	UCUCUCAGGCGACGCCA	56	0.071	N	N2	-1	98	0	0	0	0	0	0
unitig_8:5466946-5467031	Cluster_1898	86	176	17.253	0	0.989	+	GGCGGGCC	155	0.057	N	N2	-1	176	0	0	0	0	0	0
unitig_8:5482559-5482954	Cluster_1899	396	33	3.235	0	0.424	0	GUUUACACCAUCUAAGGUCACAGA	2	0.97	24	N5	0.3	2	3	1	0	1	7	19
unitig_8:5490780-5491059	Cluster_1900	280	21	2.059	0	0.952	+	CAGGGUGGAUUUGGGUCGGGGCU	6	0.571	N	N2	-1	7	5	1	0	2	6	0
unitig_8:5511213-5511266	Cluster_1901	54	111	10.881	0	0.991	+	GGCGGGCC	102	0.045	N	N2	-1	111	0	0	0	0	0	0
unitig_8:5516960-5517126	Cluster_1902	167	24	2.353	0	0.333	0	GGACUGGGA	9	0.458	N	N2	-1	19	0	1	1	3	0	0
unitig_8:5519056-5519117	Cluster_1903	62	38	3.725	0	0.974	+	CCCGUGG	36	0.079	N	N2	-1	37	0	1	0	0	0	0
unitig_8:5519529-5519612	Cluster_1904	84	2552	250.169	0	1	+	UGCAGUGAUGAUCCAAAUUAUGUGGACUAGAGUUUCUGAUCUUGCAAUUGA	1201	0.072	N	N2	-1	49	2477	18	2	2	1	3
unitig_8:5519712-5520124	Cluster_1905	413	3864	378.782	0	1	+	UGGCUUGUGAUGAUGAACGAUUUAUCUUAGCGGAUUUCAGUGAGA	676	0.09	N	N2	-1	977	2380	46	75	238	22	126
unitig_8:5524834-5524840	Cluster_1906	7	43	4.215	0	1	+	CCCGUGG	43	0.023	N	N2	-1	43	0	0	0	0	0	0
unitig_8:5532755-5533870	Cluster_1907	1116	95	9.313	0	0.821	+	AAUGAAUUCUGUGGAACUUGGCAC	7	0.674	24	N5	-1	11	7	2	9	7	3	56
unitig_8:5535085-5535758	Cluster_1908	674	50	4.901	0	0.8	+	AAUGAACUCUGUGGAACCUGGCAC	7	0.76	N	N2	-1	5	7	1	3	2	3	29
unitig_8:5536264-5536626	Cluster_1909	363	25	2.451	0	0.76	0	UUGACCAAGACAUGUCAGGAGACU	2	0.92	N	N2	-1	4	2	0	2	0	2	15
unitig_8:5554622-5555100	Cluster_1910	479	235	23.037	0	0.498	0	UCUGAAAAGCAGCCGAAUUACAGC	14	0.638	24	N5	3.9	6	36	3	17	7	34	132
unitig_8:5560404-5560417	Cluster_1911	14	39	3.823	0	1	+	GCCUGCCUGGGC	26	0.128	N	N2	-1	39	0	0	0	0	0	0
unitig_8:5568957-5569185	Cluster_1912	229	24	2.353	0	0.583	0	CGAGAGCAUUACUAGUGUUAGGAA	3	0.833	24	N6	0.2	1	2	1	2	1	2	15
unitig_8:5569282-5570198	Cluster_1913	917	86	8.43	0	0.674	0	AAGUAGGAUUCAUUCUAAAUGGAA	9	0.721	24	N5	0.9	2	9	0	3	4	8	60
unitig_8:5570661-5571424	Cluster_1914	764	54	5.294	0	0.519	0	AAGAUGAUGCUCGUUA	4	0.926	N	N2	-1	6	9	2	4	1	5	27
unitig_8:5586376-5587037	Cluster_1915	662	34	3.333	0	0.647	0	CUGUGAUCAUUACUCGUACUACA	2	0.971	24	N5	0.2	2	2	0	3	1	8	18
unitig_8:5587360-5587428	Cluster_1916	69	51	4.999	0	0.941	+	CCCGUGG	47	0.098	N	N2	-1	48	0	0	0	0	1	2
unitig_8:5587522-5587824	Cluster_1917	303	48	4.705	0	0.375	0	GACCGAGACAUGUCAGGAGACUGU	5	0.792	24	N5	0.5	0	7	1	2	1	4	33
unitig_8:5587900-5588609	Cluster_1918	710	29	2.843	0	0.586	0	CCCAAGAUUGUACCUCACAUGUUU	2	0.966	N	N2	-1	3	4	1	0	2	2	17
unitig_8:5589445-5590365	Cluster_1919	921	41	4.019	0	0.415	0	UUAGAUCGUGUCUGAAAUCCUGCC	2	0.927	24	N5	0.2	3	2	2	4	0	3	27
unitig_8:5590760-5591092	Cluster_1920	333	22	2.157	0	0.545	0	ACAUUCUCUGACAGAUCUACUGCU	2	0.955	24	N5	0.1	3	0	1	1	1	5	11
unitig_8:5591323-5592248	Cluster_1921	926	63	6.176	0	0.794	0	AUCACCUGUAGAUCCUUAAGGCAC	10	0.746	24	N5	0.4	2	5	0	5	0	4	47
unitig_8:5592375-5592929	Cluster_1922	555	39	3.823	0	0.436	0	AUGGAGAUUUCAAGUACUGACAUA	3	0.949	N	N2	-1	3	5	0	1	2	4	24
unitig_8:5596673-5596681	Cluster_1923	9	20	1.961	0	1	+	GCCGGGGC	19	0.1	N	N2	-1	20	0	0	0	0	0	0
unitig_8:5604950-5605330	Cluster_1924	381	101	9.901	0	0.564	0	AUGAUGUUUGCCAAUGAAUUGCCU	11	0.505	24	N5	0.2	0	5	3	3	4	8	78
unitig_8:5630891-5630995	Cluster_1925	105	1355	132.829	0	0.001	-	CCUCUCUCACCCCACCA	818	0.106	N	N2	-1	1071	155	8	26	16	62	17
unitig_8:5637863-5637886	Cluster_1926	24	37	3.627	0	1	+	AGGGAAAUUUUUUAUUGAACGCCU	33	0.081	24	N11	-1	0	0	0	0	0	0	37
unitig_8:5646280-5646426	Cluster_1927	147	30	2.941	0	0.9	+	GUUGGGCCCUCCA	21	0.333	N	N2	-1	26	0	0	2	1	0	1
unitig_8:5649664-5650388	Cluster_1928	725	40	3.921	0	0.65	0	AAGGACCAUGCAUAAGUCAUUGCA	9	0.65	24	N5	0.4	0	4	2	2	1	4	27
unitig_8:5650943-5651381	Cluster_1929	439	278	27.252	0	0.95	+	AAACUUUCAACAA	241	0.112	N	N2	-1	244	3	0	2	2	3	24
unitig_8:5652662-5653053	Cluster_1930	392	20	1.961	0	0.75	0	AUGUAUCCUAUCGAGGUUAGAGCU	2	0.85	24	N5	0.3	1	3	0	0	1	0	15
unitig_8:5655897-5656010	Cluster_1931	114	31	3.039	0	0.065	-	GUUGGGCCCUCCA	27	0.129	N	N2	-1	29	0	0	1	0	0	1
unitig_8:5658439-5658818	Cluster_1932	380	25	2.451	0	0.56	0	GACGGCGCCA	9	0.44	N	N2	-1	22	2	0	1	0	0	0
unitig_8:5664055-5664553	Cluster_1933	499	46	4.509	0	0.761	0	AUGUGCUCUCCU	4	0.804	N	N2	-1	9	2	1	3	2	4	25
unitig_8:5667019-5667060	Cluster_1934	42	63	6.176	0	0.984	+	CCCGUGG	62	0.032	N	N2	-1	62	1	0	0	0	0	0
unitig_8:5705863-5706300	Cluster_1935	438	21	2.059	0	0.571	0	AAAAGUCAUCGGUUGGGCGCC	1	1	N	N2	-1	10	4	0	3	3	1	0
unitig_8:5734112-5734560	Cluster_1936	449	34	3.333	0	0.735	0	AUCUACCCUUGAUCGAUAUAUUGU	4	0.794	N	N2	-1	1	6	1	0	0	4	22
unitig_8:5754282-5754291	Cluster_1937	10	20	1.961	0	1	+	GGCGCGGCU	13	0.25	N	N2	-1	20	0	0	0	0	0	0
unitig_8:5769747-5769753	Cluster_1938	7	48	4.705	0	1	+	CCCGUGG	48	0.021	N	N2	-1	48	0	0	0	0	0	0
unitig_8:5793172-5793225	Cluster_1939	54	24	2.353	0	0.875	+	AGCGGACAAUAUCGUGUUAGAUGU	12	0.375	24	N11	-1	0	0	0	1	1	0	22
unitig_8:5816562-5816630	Cluster_1940	69	52	5.097	0	0.981	+	CACUCUCAACACCA	37	0.115	N	N2	-1	51	1	0	0	0	0	0
unitig_8:5821162-5821231	Cluster_1941	70	22	2.157	0	0.136	-	ACAGAAUCGAAGACCAAUUUGACU	12	0.409	24	N11	-1	0	1	0	0	1	2	18
unitig_8:5828522-5829059	Cluster_1942	538	109	10.685	0	0.514	0	AAGGAGCUCUGACAGGAUAACACC	6	0.725	24	N5	1.1	8	13	1	11	1	10	65
unitig_8:5833715-5833791	Cluster_1943	77	37	3.627	0	0.703	0	GACCGAAACAUGUCAUGAGACUGU	10	0.459	24	N6	0.9	1	2	0	1	0	4	29
unitig_8:5842834-5842919	Cluster_1944	86	30	2.941	0	0.167	-	GAGGAUUGGAUGUUCGAAGUGAAC	18	0.433	24	N11	-1	0	2	1	0	1	1	25
unitig_8:5843655-5843744	Cluster_1945	90	32	3.137	0	0.188	-	AAACGGAAAGCUAAAACUACUCUC	8	0.656	N	N2	-1	8	1	0	1	0	4	18
unitig_8:5843897-5843990	Cluster_1946	94	44	4.313	0	0.955	+	UAGACUUGAAC	37	0.091	N	N2	-1	42	0	0	0	0	1	1
unitig_8:5859379-5859391	Cluster_1947	13	22	2.157	0	1	+	CCCGGCUGGUGC	19	0.136	N	N2	-1	22	0	0	0	0	0	0
unitig_8:5866126-5866146	Cluster_1948	21	122	11.959	0	0	-	CCAGUCCCGCCA	119	0.033	N	N2	-1	122	0	0	0	0	0	0
unitig_8:5885329-5885455	Cluster_1949	127	24	2.353	0	1	+	AUCCGCUUAUCUCCACCA	6	0.333	N	N2	-1	23	0	1	0	0	0	0
unitig_8:5888045-5888132	Cluster_1950	88	38	3.725	0	1	+	UUGUGCUAACCUUUUUCCUCGACAG	24	0.158	N	N2	-1	1	27	0	0	0	0	10
unitig_8:5894270-5894380	Cluster_1951	111	1851	181.451	0	1	+	CCGACCUUAGCUCAGUUGGU	285	0.103	N	N2	-1	763	696	290	33	12	32	25
unitig_8:5894567-5894580	Cluster_1952	14	24	2.353	0	1	+	GGAGAGAUGGCUG	21	0.125	N	N2	-1	24	0	0	0	0	0	0
unitig_8:5901324-5901344	Cluster_1953	21	25	2.451	0	0	-	CCCGUGG	24	0.08	N	N2	-1	24	0	0	1	0	0	0
unitig_8:5907574-5907580	Cluster_1954	7	44	4.313	0	1	+	CCCGUGG	44	0.023	N	N2	-1	44	0	0	0	0	0	0
unitig_8:5916920-5916981	Cluster_1955	62	36	3.529	0	0.028	-	UCGGAAUGCCCCCCA	33	0.111	N	N2	-1	36	0	0	0	0	0	0
unitig_8:5926090-5926196	Cluster_1956	107	21	2.059	0	0.19	-	UGUGUUCGAUAUAUGUAAGGUAGU	4	0.81	24	N11	-1	1	3	1	1	1	6	8
unitig_8:5931971-5932505	Cluster_1957	535	21	2.059	0	0.238	0	CCUGGAGGAAUUCUCCGGCGCC	2	0.952	N	N2	-1	5	1	0	8	7	0	0
unitig_8:5935375-5935569	Cluster_1958	195	25	2.451	0	0.96	+	GCCGGGGC	19	0.28	N	N2	-1	24	0	0	1	0	0	0
unitig_8:5943541-5943592	Cluster_1959	52	22	2.157	0	0.818	+	CUCCGAUUCUACC	4	0.545	N	N2	-1	22	0	0	0	0	0	0
unitig_8:5955289-5955583	Cluster_1960	295	42	4.117	0	0.571	0	UUUCCCAUCGUCAUCUAAUGUAGU	3	0.857	24	N6	0.8	0	3	0	4	1	8	26
unitig_8:5958683-5958812	Cluster_1961	130	27	2.647	0	0.037	-	AACAACUGUGUGGACAGAUACGGACCAGAGAUUU	4	0.778	N	N2	-1	8	16	0	1	2	0	0
unitig_8:5974186-5974637	Cluster_1962	452	2370	232.328	0	0	-	UGCCGGUGAUGCUAU	603	0.15	N	N2	-1	920	1239	37	38	31	46	59
unitig_8:5977078-5977459	Cluster_1963	382	20	1.961	0	0.8	+	AAAGGUGUUGAUCUCUUGCUUCCCACC	2	0.85	N	N2	-1	11	6	0	0	1	0	2
unitig_8:5978013-5978189	Cluster_1964	177	1207	118.321	0	0.006	-	AGACUGUGGGUUCGAGUCCCAUCGCGAUCGCCA	221	0.192	N	N2	-1	389	732	15	17	16	22	16
unitig_8:5986889-5987631	Cluster_1965	743	44	4.313	0	0.977	+	CCCCUGUCGACGCCA	6	0.75	N	N2	-1	23	15	1	1	0	3	1
unitig_8:6006121-6006178	Cluster_1966	58	58	5.686	0	0.983	+	CCCGUGG	55	0.069	N	N2	-1	57	0	1	0	0	0	0
unitig_8:6015241-6016234	Cluster_1967	994	125	12.254	0	0.6	0	AAGGGUAGAAUUCACAUGCAAUGU	21	0.696	24	N5	0.9	2	12	4	6	3	24	74
unitig_8:6022882-6022923	Cluster_1968	42	145	14.214	0	1	+	GGCGGGCC	128	0.048	N	N2	-1	145	0	0	0	0	0	0
unitig_8:6033774-6034312	Cluster_1969	539	21	2.059	0	1	+	CCGUGG	2	0.952	N	N2	-1	4	15	1	0	0	0	1
unitig_8:6038666-6039003	Cluster_1970	338	40	3.921	0	0.05	-	CUGUGUGCUGUAUAUGAAUGAAUUCGGGGAUGCAG	2	0.975	N	N2	-1	8	24	0	5	0	2	1
unitig_8:6039193-6039709	Cluster_1971	517	63	6.176	0	0	-	AGUUCGUCGACAAGUACGGC	1	1	N	N2	-1	10	37	3	7	2	3	1
unitig_8:6056614-6056705	Cluster_1972	92	50	4.901	0	1	+	CCCGUGG	47	0.06	N	N2	-1	49	0	1	0	0	0	0
unitig_8:6063791-6063849	Cluster_1973	59	407	39.898	0	0	-	AGCCCGGUCGCUGGUGC	379	0.015	N	N2	-1	407	0	0	0	0	0	0
unitig_8:6067286-6067296	Cluster_1974	11	147	14.41	0	0.993	+	GGCGGGCC	142	0.02	N	N2	-1	147	0	0	0	0	0	0
unitig_8:6068100-6068118	Cluster_1975	19	48	4.705	0	0	-	GUUCCCGUGG	22	0.083	N	N2	-1	48	0	0	0	0	0	0
unitig_8:6072084-6072232	Cluster_1976	149	42	4.117	0	0.571	0	ACCUUGAAUCGAACCGUAACUGGA	6	0.81	N	N2	-1	3	7	1	3	1	3	24
unitig_8:6072619-6072677	Cluster_1977	59	56	5.49	0	0.036	-	GUUCCCGUGG	21	0.161	N	N2	-1	56	0	0	0	0	0	0
unitig_8:6087186-6087665	Cluster_1978	480	61	5.98	0	0.492	0	AGAUUUCACGUGCACGAUCGUCCG	4	0.852	24	N5	0.8	2	7	2	4	2	6	38
unitig_8:6087817-6087833	Cluster_1979	17	55	5.392	0	1	+	UUCCCCCAACUCCACCA	22	0.109	N	N2	-1	55	0	0	0	0	0	0
unitig_8:6094487-6094499	Cluster_1980	13	30	2.941	0	0.967	+	CGGCGCGGCU	11	0.267	N	N2	-1	30	0	0	0	0	0	0
unitig_8:6097680-6097759	Cluster_1981	80	22	2.157	0	0.045	-	CCUGCCGUCACGC	19	0.182	N	N2	-1	22	0	0	0	0	0	0
unitig_8:6113115-6113121	Cluster_1982	7	41	4.019	0	1	+	CCCGUGG	41	0.024	N	N2	-1	41	0	0	0	0	0	0
unitig_8:6116315-6116335	Cluster_1983	21	28	2.745	0	0	-	AUUCCCGGCAACGCAACCA	25	0.143	N	N2	-1	27	0	0	1	0	0	0
unitig_8:6129346-6129816	Cluster_1984	471	30	2.941	0	0.633	0	UUGUCCUUAGGAUCUGCAGCCU	4	0.833	N	N2	-1	5	8	1	4	12	0	0
unitig_8:6130403-6130423	Cluster_1985	21	188	18.429	0	1	+	UCACGUCGGGUUCACCA	46	0.122	N	N2	-1	175	0	0	13	0	0	0
unitig_8:6138744-6138756	Cluster_1986	13	62	6.078	0	1	+	AGUGCUCUCCU	56	0.081	N	N2	-1	62	0	0	0	0	0	0
unitig_8:6147094-6147120	Cluster_1987	27	25	2.451	0	0.16	-	GCCGGUCCGCC	16	0.28	N	N2	-1	25	0	0	0	0	0	0
unitig_8:6157340-6157852	Cluster_1988	513	40	3.921	0	0.7	0	CCGGGCC	13	0.5	N	N2	-1	28	10	0	1	1	0	0
unitig_8:6167532-6167552	Cluster_1989	21	402	39.407	0	1	+	ACCUGCAUGGGCCACCA	143	0.072	N	N2	-1	389	0	10	3	0	0	0
unitig_8:6188434-6188442	Cluster_1990	9	146	14.312	0	1	+	GGCGGGCC	132	0.021	N	N2	-1	146	0	0	0	0	0	0
unitig_8:6199430-6199520	Cluster_1991	91	111	10.881	0	0.991	+	CAUGGGGUCACCA	110	0.018	N	N2	-1	111	0	0	0	0	0	0
unitig_8:6221710-6222056	Cluster_1992	347	37	3.627	0	0.946	+	GGCGCGGCU	8	0.405	N	N2	-1	37	0	0	0	0	0	0
unitig_8:6223988-6224118	Cluster_1993	131	43	4.215	0	0.953	+	CCCGUGG	35	0.186	N	N2	-1	43	0	0	0	0	0	0
unitig_8:6257512-6257850	Cluster_1994	339	92	9.019	0	0.707	0	AAACCAUCGGAGAAUAGAAAAACU	21	0.652	N	N2	-1	4	16	0	3	2	7	60
unitig_8:6276836-6276936	Cluster_1995	101	45	4.411	0	0.022	-	GGCGGGCC	38	0.089	N	N2	-1	44	0	0	0	0	1	0
unitig_8:6277815-6277903	Cluster_1996	89	34	3.333	0	0.971	+	CCCGUGG	33	0.059	N	N2	-1	34	0	0	0	0	0	0
unitig_8:6285708-6285779	Cluster_1997	72	70	6.862	0	0.071	-	CCGACCACGCCA	61	0.071	N	N2	-1	70	0	0	0	0	0	0
unitig_8:6296950-6297305	Cluster_1998	356	26	2.549	0	0.962	+	GCCGGGGC	16	0.423	N	N2	-1	18	6	0	1	0	1	0
[truncated: 11,675 more rows]

## Sheet: Novel mirnas
Novel miRNAs identified
Cluster_12489	148	2004	62.297	15	0.002	-	CAGCCAAGGAUGAUUUGCCGG	1306	0.069	21	Y	-1	61	25	119	1605	165	17	12
Cluster_12490	95	3959	123.071	8	0	-	GGAAUGUUGUCUGGCUCGAGG	1813	0.025	21	Y	-1	27	14	27	3592	264	25	10
